# Supplementary material for: DNA methylation defines regional identity of human intestinal epithelial organoids and undergoes dynamic changes during development
Source: PubMed Central journal article supplement (PMC6839835; doi:10.1136/gutjnl-2017-314817), 2017-11-15
Supplement: gutjnl-2017-314817supp001.pdf [file gutjnl-2017-314817supp001.pdf]

## Supplementary Material and Methods

**Table S1.** Patient information for the samples used for DNA methylation arrays

| Sample ID | Age group  | Sex | Age      | Sample Type    | Gut Location  | Passage | Treatments             | Ref   |
|-----------|------------|-----|----------|----------------|---------------|---------|------------------------|-------|
| 1         | paediatric | M   | 13 yrs   | purified       | T1 and SC     | na      |                        | [1,2] |
| 7         | paediatric | F   | 14 yrs   | purified       | T1 and SC     | na      |                        | [1,2] |
| 12        | paediatric | F   | 15 yrs   | purified       | T1 and SC     | na      |                        | [2]   |
| 15        | paediatric | F   | 15 yrs   | purified       | T1 and SC     | na      |                        | [2]   |
| 22        | paediatric | F   | 14 yrs   | purified       | T1 and SC     | na      |                        | [2]   |
| 23        | paediatric | M   | 14 yrs   | purified       | T1 and SC     | na      |                        | [1,2] |
| 31        | paediatric | M   | 9 yrs    | purified       | T1 and SC     | na      |                        | [2]   |
| 39        | paediatric | M   | 14 yrs   | purified       | T1 and SC     | na      |                        | [1,2] |
| 42        | paediatric | M   | 15 yrs   | purified       | T1 and SC     | na      |                        | [2]   |
| 56        | paediatric | F   | 13 yrs   | purified       | T1 and SC     | na      |                        | [1,2] |
| 63        | paediatric | M   | 6 yrs    | purified       | T1 and SC     | na      |                        | [2]   |
| 64        | paediatric | M   | 13 yrs   | purified       | T1 and SC     | na      |                        | [2]   |
| 71        | paediatric | M   | 9 yrs    | purified       | T1 and SC     | na      |                        | [2]   |
| 100       | paediatric | M   | 14 yrs   | purified       | T1 and SC     | na      |                        | [2]   |
| P1        | paediatric | M   | 13 yrs   | purified       | T1 and SC     | na      |                        | [1]   |
| P2        | paediatric | F   | 8 yrs    | purified       | T1 and SC     | na      |                        | [1]   |
| 200       | paediatric | M   | 12 yrs   | organoids      | T1 and SC     | 6       |                        |       |
| 212       | paediatric | M   | 11 yrs   | organoids      | T1 and SC     | 6       |                        |       |
| 212       | paediatric | M   | 11 yrs   | organoids      | T1 and SC     | 11      | longitudinal samples   |       |
| 223       | paediatric | F   | 15 yrs   | organoids      | T1 and SC     | 2       |                        |       |
| 223       | paediatric | F   | 15 yrs   | organoids      | T1 and SC     | 8       | longitudinal samples   |       |
| 224       | paediatric | F   | 15 yrs   | organoids      | T1 and SC     | 2 and 3 |                        |       |
| 224       | paediatric | F   | 15 yrs   | organoids      | T1 and SC     | 9       | longitudinal samples   |       |
| 225       | paediatric | F   | 14 yrs   | organoids      | T1 and SC     | 2       |                        |       |
| 229       | paediatric | M   | 5 yrs    | organoids      | T1 and SC     | 1       |                        |       |
| 242       | paediatric | F   | 4 yrs    | organoids      | T1 and SC     | 1       |                        |       |
| F_1       | foetal     | M   | GA 12 wk | purified       | FPG and FDG   | na      |                        | [1]   |
| 1320      | foetal     | M   | GA 11 wk | purified       | FPG and FDG   | na      |                        | [1]   |
| 1327      | foetal     | M   | GA 9 wk  | purified       | FPG and FDG   | na      |                        | [1]   |
| 1324      | foetal     | F   | GA 10 wk | purified       | FPG and FDG   | na      |                        |       |
| 1792      | foetal     | M   | GA 10 wk | purified       | FPG           | na      |                        |       |
| 1690      | foetal     | F   | GA 10 wk | purified       | FPG           | na      |                        |       |
| 1690      | foetal     | F   | GA 10 wk | organoids      | FPG and FDG   | 2       |                        |       |
| 1690      | foetal     | F   | GA 10 wk | organoids      | FPG and FDG   | 14      | longitudinal samples   |       |
| 1690      | foetal     | F   | GA 10 wk | organoids      | FPG and FDG   | 23      | longitudinal samples   |       |
| 1706      | foetal     | F   | GA 9 wk  | organoids      | FPG and FDG   | 9       |                        |       |
| 1707      | foetal     | M   | GA 9 wk  | organoids      | FPG and FDG   | 3       |                        |       |
| 1720      | foetal     | M   | GA 10 wk | organoids      | FPG and FDG   | 7       |                        |       |
| 1769      | foetal     | F   | GA 11 wk | organoids      | FPG and FDG   | 1 and 2 |                        |       |
| 1769      | foetal     | F   | GA 11 wk | organoids      | FPG and FDG   | 5       | longitudinal samples   |       |
| 1770      | foetal     | M   | GA 10 wk | organoids      | FPG and FDG   | 1       |                        |       |
| 1780      | foetal     | M   | GA 11 wk | organoids      | FPG and FDG   | 1 and 3 |                        |       |
| 39        | paediatric | M   | 14 yrs   | non-epithelial | T1, AC, SC    | na      |                        |       |
| WP1       | paediatric | F   | 5-15 yrs | whole biopsy   | SC            | na      |                        |       |
| WP2       | paediatric | M   | 5-15 yrs | whole biopsy   | SC            | na      |                        |       |
| WP3       | paediatric | M   | 5-15 yrs | whole biopsy   | SC            | na      |                        |       |
| WP4       | paediatric | M   | 5-15 yrs | whole biopsy   | SC            | na      |                        |       |
| WP5       | paediatric | M   | 5-15 yrs | whole biopsy   | SC            | na      |                        |       |
| WP6       | paediatric | M   | 5-15 yrs | whole biopsy   | SC            | na      |                        |       |
| 200       | paediatric | M   | 12 yrs   | organoids      | T1 and SC     | 11      | Diff and non-Diff Ctrl |       |
| 224       | paediatric | F   | 15 yrs   | organoids      | T1 and SC     | 11      | Diff and non-Diff Ctr  |       |
| 281       | paediatric | F   | 2 yrs    | organoids      | GHR, REC, STO | 3       | GM and Ctrl            |       |
| 281       | paediatric | F   | 2 yrs    | organoids      | GHR, REC, STO | 5       | GM and Ctrl            |       |
| 363       | paediatric | M   | 4 yrs    | organoids      | T1 and SC     | 4       | Diff and non-Diff Ctr  |       |
| 369       | paediatric | M   | 9 yrs    | organoids      | T1 and SC     | 3       | Diff and non-Diff Ctr  |       |
| 1769      | foetal     | F   | GA 11 wk | organoids      | FPG           | 8       | TET1 KO                |       |
| 1769      | foetal     | F   | GA 11 wk | organoids      | FPG           | 18      | TET1 KO                |       |
| 1769      | foetal     | F   | GA 11 wk | organoids      | FPG           | 12      | WT Ctrl                |       |
| 1769      | foetal     | F   | GA 11 wk | organoids      | FPG           | 21      | WT Ctrl                |       |
| 1888      | foetal     | F   | GA 9 wk  | organoids      | FPG           | 2       | Ctrl and AdC           |       |
| 1888      | foetal     | F   | GA 9 wk  | organoids      | FPG           | 6       | Ctrl and AdC           |       |
| 1889      | foetal     | M   | GA 8 wk  | organoids      | FPG           | 2       | Ctrl and AdC           |       |
| 1889      | foetal     | M   | GA 8 wk  | organoids      | FPG           | 6       | Ctrl and AdC           |       |

**Table S1 continued**

| ID  | Age group | Sex | Age    | Sample Type | Gut Location | Passage | Treatments | Ref |
|-----|-----------|-----|--------|-------------|--------------|---------|------------|-----|
| A02 | adult     | F   | 60 yrs | organoids   | SC           | 3       |            |     |
| A03 | adult     | M   | 35 yrs | organoids   | SC           | 2       |            |     |
| A04 | adult     | F   | 26 yrs | organoids   | TI and SC    | 4       |            |     |
| A06 | adult     | F   | 24 yrs | organoids   | TI and SC    | 2       |            |     |

TI= Terminal Ileum, AC=ascending colon; SC= Sigmoid Colon, GA= Gestational age, FPG= Foetal proximal gut, FDG= Foetal distal gut, yrs= years, GA= Gestational age, na= not applicable, Diff=Differentiation, Ctrl=Control, GM=Gastric medium, KO=Knockout, WT= Wildtype, STO=Stomach, GHR=Gastric Heterotopia in the rectum, REC=Rectum, AdC=Acadeoxycytidine, Ctrl=Control, Ref= Reference

**Table S2. Patient information for the samples used for RNA sequencing**

| ID    | Age group  | Sex | Age        | Sample Type | Gut Location | Passage | Reference |
|-------|------------|-----|------------|-------------|--------------|---------|-----------|
| 1     | paediatric | M   | 13 yrs     | purified    | TI and SC    | na      | [2]       |
| 7     | paediatric | F   | 14 yrs     | purified    | TI and SC    | na      | [2]       |
| 15    | paediatric | F   | 15 yrs     | purified    | TI and SC    | na      | [2]       |
| 22    | paediatric | F   | 14 yrs     | purified    | TI and SC    | na      | [2]       |
| 23    | paediatric | M   | 14 yrs     | purified    | TI and SC    | na      | [2]       |
| 31    | paediatric | M   | 9 yrs      | purified    | TI and SC    | na      | [2]       |
| 39    | paediatric | M   | 14 yrs     | purified    | TI and SC    | na      | [2]       |
| 42    | paediatric | M   | 15 yrs     | purified    | TI and SC    | na      | [2]       |
| 56    | paediatric | F   | 13 yrs     | purified    | TI and SC    | na      | [2]       |
| 63    | paediatric | M   | 6 yrs      | purified    | TI and SC    | na      | [2]       |
| 71    | paediatric | M   | 9 yrs      | purified    | TI and SC    | na      | [2]       |
| 212   | paediatric | M   | 11 yrs     | organoids   | TI and SC    | 6       |           |
| 223   | paediatric | F   | 15 yrs     | organoids   | TI and SC    | 2       |           |
| 224   | paediatric | F   | 15 yrs     | organoids   | TI and SC    | 2 and 3 |           |
| 229   | paediatric | M   | 5 yrs      | organoids   | TI and SC    | 1       |           |
| 242   | paediatric | F   | 4 yrs      | organoids   | TI and SC    | 1       |           |
| 1792  | foetal     | M   | GA nk      | purified    | FPG          | na      |           |
| 5     | foetal     | nk  | GA 11 wk   | purified    | FPG          | na      |           |
| 8     | foetal     | nk  | GA 9 wk    | purified    | FPG          | na      |           |
| 1324  | foetal     | F   | GA 10 wk   | purified    | FPG          | na      |           |
| 1327  | foetal     | M   | GA 9 wk    | purified    | FPG          | na      |           |
| Pool1 | foetal     | nk  | GA 9-11 wk | purified    | FDG          | na      |           |
| Pool2 | foetal     | nk  | GA 9-11 wk | purified    | FDG          | na      |           |
| Pool3 | foetal     | nk  | GA 9-11 wk | purified    | FDG          | na      |           |
| 1690  | foetal     | F   | GA 10 wk   | organoids   | FPG and FDG  | 2       |           |
| 1720  | foetal     | M   | GA 10 wk   | organoids   | FPG and FDG  | 7       |           |
| 1769  | foetal     | F   | GA 11 wk   | organoids   | FPG and FDG  | 1 and 2 |           |
| 1770  | foetal     | M   | GA 10 wk   | organoids   | FPG and FDG  | 1       |           |
| 1780  | foetal     | M   | GA 11 wk   | organoids   | FPG and FDG  | 1 and 3 |           |

TI= Terminal Ileum, SC= Sigmoid Colon, GA= Gestational age, FPG= Foetal proximal gut, FDG= Foetal distal gut, wk=weeks, nk=not known, yrs=years, na= not applicable

## Human intestinal epithelial organoid culture

The complete media composition for maintenance and differentiation of IEO as derived from [3,4] is shown in Tables S3 and S4. Media for newly seeded crypts was supplemented with 10  $\mu$ M Y-27632 (Sigma). Conditioned media were kindly provided by Bon-Kyoung Koo (Wellcome Trust-MRC Stem Cell Institute, University of Cambridge, UK). Organoids were maintained with media change every 2 days and splitting by mechanical disruption every 7-10 days. Organoids were harvested by dissolving Matrigel with Cell Recovery Solution (Corning®) for 30 min on ice and 60 min at 4° C on a roller-shaker; washing with PBS and subsequent lysis in RLT Plus buffer with 1%  $\beta$ - Mercaptoethanol (Qiagen).

**Table S3.** Media composition for human intestinal organoids

| <b>Basal Organoid medium = ADF+++</b>            | <b>Final concentration</b> |
|--------------------------------------------------|----------------------------|
| Products from Gibco by Thermo Fisher Scientific  |                            |
| Advanced DMEM/F12 (ADF)                          | 1x                         |
| GlutaMax                                         | 2 mM                       |
| HEPES buffer                                     | 10 mM                      |
| Penicillin/Streptomycin                          | 0.5 U/ml                   |
| <b>Complete medium</b>                           | <b>Final concentration</b> |
| ADF+++ (see above)                               | 27% (vol/vol)              |
| Wnt3a- conditioned medium                        | 50 % (vol/vol)             |
| R-spo- conditioned medium                        | 20 % (vol/vol)             |
| Primocin (Invivogen, San Diego, CA, USA)         | 500 $\mu$ g/mL             |
| B-27® Supplement (Invitrogen, Carlsbad, CA, USA) | 1x                         |
| Nicotinamide (Sigma, St. Louis, MO, USA)         | 10 mM                      |
| N-Acetylcysteine (Sigma, St. Louis, MO, USA)     | 1.25 mM                    |
| A-83-01 (Tocris, Bristol, UK)                    | 500 nM                     |
| SB202190 (Sigma, St. Louis, MO, USA)             | 10 $\mu$ M                 |
| Murine EGF (Invitrogen, Carlsbad, CA, USA)       | 50 ng/mL                   |
| Murine Noggin (Peprotech, Rocky Hill, NJ, USA)   | 100 ng/mL                  |
| Addition for foetal Organoids: PGE <sub>2</sub>  | 2.5 $\mu$ M                |

**Table S4:** Media composition for gastric and gastric heterotopic organoids

| <b>Complete medium</b>                           | <b>Final concentration</b> |
|--------------------------------------------------|----------------------------|
| ADF+++ (see above)                               | 25% (vol/vol)              |
| Wnt3a- conditioned medium                        | 50%                        |
| R-spo- conditioned medium                        | 25%                        |
| B-27® Supplement (Invitrogen, Carlsbad, CA, USA) | 1x                         |
| N-Acetylcysteine (Sigma, St. Louis, MO, USA)     | 1.25 mM                    |
| Nicotinamide (Sigma, St. Louis, MO, USA)         | 10 mM                      |
| Murine EGF (Invitrogen, Carlsbad, CA, USA)       | 20 ng/mL                   |
| Murine Noggin (Peprotech, Rocky Hill, NJ, USA)   | 150 ng/mL                  |
| FGF10 (Sigma, St. Louis, MO, USA)                | 150 ng/mL                  |
| Gastrin (Sigma, St. Louis, MO, USA)              | 10 nM                      |
| A-83-01 (Tocris, Bristol, UK)                    | 1 $\mu$ M                  |
| SB202190 (Sigma, St. Louis, MO, USA)             | 2 $\mu$ M                  |

**Table S5:** Media composition for in vitro differentiation of IEO

| Complete medium                                  | Final concentration |
|--------------------------------------------------|---------------------|
| ADF+++ (see above)                               | 77% (vol/vol)       |
| R-spo- conditioned medium                        | 20 % (vol/vol)      |
| Primocin (Invivogen, San Diego, CA, USA)         | 500 µg/mL           |
| B-27® Supplement (Invitrogen, Carlsbad, CA, USA) | 1x                  |
| N-Acetylcysteine (Sigma, St. Louis, MO, USA)     | 1.25 mM             |
| A-83-01 (Tocris, Bristol, UK)                    | 500 nM              |
| Murine EGF (Invitrogen, Carlsbad, CA, USA)       | 50 ng/mL            |
| Murine Noggin (Peprotech, Rocky Hill, NJ, USA)   | 100 ng/mL           |

**Table S6.** Primers used for PCR and pyrosequencing

| Gene     | Forward primer [5'-3']             | Reverse primer [5'-3']                           | Sequencing primer [5'-3']    |
|----------|------------------------------------|--------------------------------------------------|------------------------------|
| GATA2    | GTTGGGTAGAAAGGA<br>GAGGGATAAAAGA   | [Btn]-<br>AATAATAACAAAAATCACCCA<br>ACTCA<br>ACCT | AAAAGAGGAGAGGGG              |
| HHEX     | TTTGTAAAGAAGGGTT<br>TTAGAGTAG      | [Btn]-<br>TAACCTCCTAACCTACCTTTATCAT              | AGGGGTTTTAGAGTA<br>GA        |
| IL6R     | GGTTGGGGTAGAGGG<br>GTTTAGTTA       | [Btn]-CCCCACTCACA<br>AACACATTACT                 | GTTTTTTTTAAGGGAG<br>GT       |
| SATB2AS1 | TTTTTAGTTTAGGATG<br>TTTTGGGATAT    | [Btn]-<br>AAAACCCCAATTA<br>ACTATCTATTATAT<br>CAA | GGGATATTAGGATTTA<br>GGAGAGA  |
| TET1     | AGATTTTGGAGAGAG<br>AATAGGATTAGGTA  | [Btn]-<br>ATACTCCAAATA<br>ACTATTACCCTTACT        | GGAGAGAGAATAGGA<br>TTAGGTATA |
| TLR4     | ATGATTAATTGGGATA<br>AAAGTTAATTAGTT | [Btn]-<br>CTACTTCTATA<br>AACACAATAACCCTA<br>TA   | AGAGAAGATATTAGTG<br>TTTTAG   |

Btln=5'-biotinylation

**Table S7.** Gene expression primers used for real-time PCR

| Gene   | Forward primer [5'-3']  | Reverse Primer [5'-3']  |
|--------|-------------------------|-------------------------|
| ACTA2  | AAAAGACAGCTACGTGGGTGA   | GCCATGTTCTATCGGGTACTTC  |
| ALPI   | CATGGACCGCTTCCCATA      | GGCACCTGTCTGTCCACAT     |
| CD45   | ACCACAAGTTTACTAACGCAAGT | TTTGAGGGGGATTCCAGGTAAT  |
| CFTR   | AGTGGAGGAAAGCCTTTGGAGT  | ACAGATCTGAGCCCAACTCA    |
| CLDN15 | GGCTTCTTCATGGCAACTGT    | GGAACTCCCAGCAGTTGTA     |
| FABP6  | ACTACTCCGGGGGCCACACCAT  | GTCTCTTGCTCAGCGCTCATAGG |
| GAPDH  | AGGTCGGAGTCAACGGATTT    | TGGAAGATGGTGATGGGATTT   |
| Ki67   | GAGAGTAACGCGGAGTGTC     | CCCAGTTCGATTTTTCTGTCA   |
| LGR5   | CTCCCAGGTCTGGTGTGTTG    | GAGGTCTAGGTAGGAGGTGAAG  |
| LRIG   | GGACTTGCCGAACCTACAGG    | GCTGCGAATCTTGTGTGCTG    |
| LYZ    | TCAATAGCCGCTACTGGTGTA   | ATCACGGACAACCCTCTTTGC   |
| MUC12  | CCAGTTC AAGCGACCCCTTTTA | CGCTGTGGGATACTGTTGATT   |
| MUC17  | ATAGGGCCACCGGAGACTAT    | TGCCAAGACGTAGCTTTGTG    |
| MUC2   | GATTGCAAGTGAAGAGCAAG    | CACTTGGAGGAATAAACTGG    |
| MUC4   | CGTTCTGGGACGATGCTGAC    | GATGGCTTGGTAGGTGTTGCT   |
| MUC5B  | GTGCCCTTGCACTGTCCTAACG  | ACAATGCACATCCTGGCTCCAG  |
| NR1H4  | CCCCAAGTTCAACCACAGAT    | CTTTGATCCTCCCTGCTGAC    |
| PECAM1 | AACAGTGTTGACATGAAGAGCC  | TGTA AAAACAGCAGTCATCCTT |
| SATB2  | CTTTGCAAGAGTGGCATTCA    | GTTGTCCGGTGTGCGAGTTTTT  |
| SI     | TCATGTATGGGGGAAAGGAA    | TGTGTGTGGTCAGATCAATACG  |
| SLC5A1 | ATCTATATTAAGGCTGGGGTG   | TCTTGGTGAAAATGTAGAGC    |
| SOX9   | CTCTGGAGACTTCTGAACGAGAG | CCTTGAAGATGGCGTTGGGG    |
| TFF3   | GGAGTGCCTTGGTGTITCAA    | CCCAGGACGCAGCAGAAA      |
| VIL1   | CTGAGCGCCCAAGTCAAAG     | AGCAGTCACCATCGAAGAAGC   |
| VIM    | GACGCCATCAACACCGAGTT    | CTTTGTCGTTGGTTAGCTGGT   |

## **RNA sequencing**

Libraries for RNA sequencing were prepared with Illumina TruSeq protocol (Illumina, Cambridge, UK). RNA sequencing was performed using paired-end reads on the Illumina HiSeq 2500 platform (Illumina, Cambridge, UK) at the Institute of Clinical Molecular Biology at the University of Kiel (Kiel, Germany) and the Wellcome Trust Sanger Institute (Hinxton, UK).

## **Bioinformatic analysis**

### **DNA methylation analysis**

Pre-processing included filtering of probes for significant detection p-value ( $<e10^{-5}$ ), functional normalization, exclusion of probes located on X and Y chromosomes or probes co-locating with SNPs was performed using the Bioconductor package *minfi* [5]. Batch correction was achieved using the *combat* function in the package *sva* [6]. Beta and M values were called using *minfi* [5]. Differential methylation analysis was performed on M-values using *limma* [7] for differentially methylated positions (DMPs) (adjusted  $p < 0.01$ ) and *DMRcate* [8] for differentially methylated regions (DMRs). Heatmaps based on M-values were created using *heatmap3* [9].

### **RNA sequencing analysis**

Pre-processing of sequencing data included removal of low quality reads using *fastq\_illumina\_filter* and trimming of adapters using *cutadapt* [10]. Filtered reads were subsequently mapped to the human genome using the GRCh37 reference with *tophat2* [11], *bowtie* [12] and *samtools* [13]. Raw read alignments were counted using *htseq-count* [14]. Batch correction was performed using *RUVseq* based on expression of housekeeping genes as control genes by calling the *ruvg* function [15]. Differential gene expression analysis was performed on normalized counts using *DESeq2* [16] with a cut-off of adjusted  $p < 0.01$  and  $\text{Log}_2\text{FoldChange} > 1.5$  or  $< -1.5$ . Heatmaps were created on  $\text{rlog}$ -transformed read counts using *heatmap3* [9]. Gene ontology analysis was performed using *GOseq* [17].

## **Immunofluorescence and imaging**

Organoids in Matrigel were fixed with 4% formaldehyde (Sigma) for 20 min at room temperature, washed and blocked for 1 hour in blocking buffer [10% goat serum (New England Biolabs) +1% BSA +0.5% Triton-X (both Sigma)]. Primary antibody [Anti-FABP6 (1:500, HPA012601, Atlas Antibodies), anti-MUC5B (1:100, HPA008246, Atlas

Antibodies), or anti-EpCAM (1:200, ab20160, Abcam)] was applied in blocking buffer overnight at 4°C. After washing, goat anti-rabbit IgG (Life Technologies) or goat-anti mouse IgG (abcam) was applied 1:1000 for 1h at room temperature with added nuclear dye DAPI (1µg/ml) (Sigma). Organoids were washed 5 times with PBS+0.05% Tween-20 (Sigma) and imaged. Fluorescent and brightfield images were obtained using an EVOS FL system (Life Technologies).

## Vector construction and genome editing

The targeting vector was generated by PCR-amplification of homology arms from human genomic DNA using Phusion polymerase kit (New England Biolabs) (Table S8) and assembly into pUC118-FLIP-Puro vector backbone (Addgene #84538,[18]) via Golden Gate cloning reaction. Recombined plasmids were tested for the correct insert by restriction digest and Sanger-sequencing at the Department of Biochemistry, University of Cambridge. For the sgRNA vector, the TET1-specific gRNA was amplified from the generic gRNA vector template by reverse PCR using Phusion HF polymerase (New England Biolabs) (Table S9).

**Table S8:** Primer sequences for amplification of homology arms

| Forward Primer [5'-3'] for 5'Arm | Reverse Primer [5'-3'] for 5'Arm |
|----------------------------------|----------------------------------|
| TGTGCACCACCACACTCAGCTAA          | CACACAAGGTTTTGGTCTGAAATAACAACA   |
| Forward Primer [5'-3'] for 3'Arm | Reverse Primer [5'-3'] for 3'Arm |
| GGGAGACAGCTGACACTTGGTATAGTGA     | CACCACACCAGGCCTACAATACTTCTAA     |

**Table S9:** Primer sequences for PCR amplification of vector

| Forward primer [5'-3']                       | Specific reverse primer [5'-3']                  |
|----------------------------------------------|--------------------------------------------------|
| [Phos]-<br>GTTTTAGAGCTAGAAATAGCAAGTTAAATAAGG | TGCATGGCGGGATCGAGACACGGTGTTT<br>CGTCCTTCCACAAGAT |

Phos= 5'phosphorylation.

Human IEOs were cultured in conditioned-medium-free medium (Table S10) and electroporated following the protocol from Fujii et al [19]. Puromycin (2µg/ml) was used for selection on day 7 after electroporation.

Genotyping of individual organoid clones was performed by PCR reaction targeting each of the junctions of the integrated cassette (Table S11). Sequencing of the genomic WT allele (TET1 exon2, Table S11), as well as the TET1 transcript from cDNA (spanning exon1 - exon2) was performed by Sanger sequencing by Source Bioscience (Cambridge, UK) (Table S12).

**Table S10:** Medium used for organoids before and after electroporation

| Reagent                                                                                  | Final concentration |
|------------------------------------------------------------------------------------------|---------------------|
| AdF+++=<br>Advanced DMEM/F12 +1%GlutaMax+ 1 mM HEPES<br>(all Gibco by Life Technologies) | 97.5 % (vol/vol)    |
| B 27 supplement (Invitrogen)                                                             | 1x                  |
| Nicotinamide (Sigma)                                                                     | 10 mM               |
| N-Acetylcysteine (Sigma)                                                                 | 1.25 mM             |
| EGF (Invitrogen)                                                                         | 50 ng/ml            |
| Noggin (Peprotech)                                                                       | 100 ng/ml           |
| A83-01 (Tocris)                                                                          | 500 nM              |
| SB202190 (Sigma)                                                                         | 10 µM               |
| 15-Leu Gastrin I (Sigma)                                                                 | 10 nM               |
| CHIR99021 (Cheyman Chemical)                                                             | 5 µM                |
| <b>Optional depending on time point</b>                                                  |                     |
| DMSO (Sigma)                                                                             | 1.25 % (vol/vol)    |
| Y-27632 (Sigma)                                                                          | 10 µM               |

**Table S11:** Primer sequences for amplification of cassette integration site and for amplification and sequencing of WT allele in exon2

| Target          | Forward primer [5'-3']    | Reverse primer [5'-3']    |
|-----------------|---------------------------|---------------------------|
| 3'-arm junction | TGAGACGTGCTACTTCCATTTGTCA | TGTAAACCACCATGCCCAACCACAA |
| 5'arm junction  | GCCCAGCCAGTACCGGATAGTTTT  | CTTCTAGTTGCCAGCCATCTGTTGT |
| EXON2           | GGAAGATTGCTTGAGCCTGGGTAGG | CCCATTGCAGGTTAAGGACTCTGGG |

**Table S12:** Primer sequences for amplification and sequencing of TET1 mRNA spanning exon1-exon2 junction

| Target    | Forward primer [5'-3'] | Reverse primer [5'-3'] |
|-----------|------------------------|------------------------|
| TET1 mRNA | CGAGTTGGAAAGTTTGCCCG   | GCACGGGTGGTTTAGGTTCT   |

## References

- 1 Kraiczy J, Nayak K, Ross A, *et al.* Assessing DNA methylation in the developing human intestinal epithelium: potential link to inflammatory bowel disease. *Mucosal Immunol* 2016;**9**:647–58. doi:10.1038/mi.2015.88
- 2 Howell K, Kraiczy J, Nayak K, *et al.* DNA Methylation and Transcription Patterns in Intestinal Epithelial Cells From Pediatric Patients With Inflammatory Bowel Diseases Differentiate Disease Subtypes and Associate With Outcome. *Gastroenterology* 2017;**In press**. doi:10.1053/j.gastro.2017.10.007
- 3 Sato T, Stange DE, Ferrante M, *et al.* Long-term expansion of epithelial organoids from human colon, adenoma, adenocarcinoma, and Barrett's epithelium. *Gastroenterology* 2011;**141**:1762–72. doi:10.1053/j.gastro.2011.07.050
- 4 Fordham RP, Yui S, Hannan NRF, *et al.* Transplantation of expanded fetal intestinal progenitors contributes to colon regeneration after injury. *Cell Stem Cell* 2013;**13**:734–44. doi:10.1016/j.stem.2013.09.015
- 5 Aryee MJ, Jaffe AE, Corrada-Bravo H, *et al.* Minfi: a flexible and comprehensive Bioconductor package for the analysis of Infinium DNA methylation microarrays. *Bioinformatics* 2014;**30**:1363–9. doi:10.1093/bioinformatics/btu049
- 6 Leek JT, Johnson WE, Parker HS, Fertig EJ JA and SJ. sva: Surrogate

- Variable Analysis. *R Packag version 3180*
- 7 Ritchie ME, Phipson B, Wu D, *et al.* limma powers differential expression analyses for RNA-sequencing and microarray studies. *Nucleic Acids Res* 2015;**43**:e47. doi:10.1093/nar/gkv007
- 8 Peters TJ, Buckley MJ, Statham AL, *et al.* De novo identification of differentially methylated regions in the human genome. *Epigenetics Chromatin* 2015;**8**:6. doi:10.1186/1756-8935-8-6
- 9 Zhao S, Guo Y, Sheng Q, *et al.* heatmap3: An Improved Heatmap Package. 2015. <https://cran.r-project.org/web/packages/heatmap3/index.html>
- 10 Martin M. Cutadapt removes adapter sequences from high-throughput sequencing reads. *EMBnet.journal* 2011;**17**:10. doi:10.14806/ej.17.1.200
- 11 Kim D, Pertea G, Trapnell C, *et al.* TopHat2: accurate alignment of transcriptomes in the presence of insertions, deletions and gene fusions. *Genome Biol* 2013;**14**:R36. doi:10.1186/gb-2013-14-4-r36
- 12 Langmead B. Aligning short sequencing reads with Bowtie. *Curr Protoc Bioinformatics* 2010;**Chapter 11**:Unit 11.7. doi:10.1002/0471250953.bi1107s32
- 13 Li H, Handsaker B, Wysoker A, *et al.* The Sequence Alignment/Map format and SAMtools. *Bioinformatics* 2009;**25**:2078–9. doi:10.1093/bioinformatics/btp352
- 14 Anders S, Pyl PT, Huber W. HTSeq - A Python framework to work with high-throughput sequencing data. *Bioinformatics* 2014;**31**:166–9. doi:10.1093/bioinformatics/btu638
- 15 Risso D, Ngai J, Speed TP, *et al.* Normalization of RNA-seq data using factor analysis of control genes or samples. *Nat Biotechnol* 2014;**32**:896–902. doi:10.1038/nbt.2931
- 16 Love MI, Huber W, Anders S. Moderated estimation of fold change and dispersion for RNA-seq data with DESeq2. *Genome Biol* 2014;**15**:550. doi:10.1186/s13059-014-0550-8
- 17 Young MD, Wakefield MJ, Smyth GK, *et al.* Gene ontology analysis for RNA-seq: accounting for selection bias. *Genome Biol* 2010;**11**:R14. doi:10.1186/gb-2010-11-2-r14
- 18 Andersson-Rolf A, Mustata RC, Merenda A, *et al.* One-step generation of conditional and reversible gene knockouts. *Nat Methods* 2017;**14**:287–9. doi:10.1038/nmeth.4156
- 19 Fujii M, Matano M, Nanki K, *et al.* Efficient genetic engineering of human intestinal organoids using electroporation. *Nat Protoc* 2015;**10**:1474–85. doi:10.1038/nprot.2015.088
