# Supplementary material for: DNA methylation defines regional identity of human intestinal epithelial organoids and undergoes dynamic changes during development
Source: Gut. 2017 Nov 15;68(1):49–61. doi: 10.1136/gutjnl-2017-314817 (PMC6839835; doi:10.1136/gutjnl-2017-314817)
Supplement: Supplementary file 4 [file gutjnl-2017-314817supp003.xls]

## Sheet: Scp_TIp_dmps_001_anno
Supplementary Table S13. SCp vs TIp DMPs
Differentially methylated positions (DMPs) comparing purified intestinal epithelial cells (IEC) derived from sigmoi dcolon (SCp) compared to terminal ileum (TIp) using a cut-off of adjusted p<0.01. Annotation in columns E-S based on Illumina Infinium Human Methylation450 BeadChip v 1-2
Column Name	Description
IlmnID	Unique CpG locus identifier from the Illumina CG database
logFC	Log Fold change comparing the contrast SCp-Tip using limma Bioconductor package
Genome_Build	Genome build on which forward sequence is based
CHR	Chromosome - genome build 37
MAPINFO	Coordinates - genome build 37
Strand	Design strand
UCSC_RefGene_Name	Gene name (UCSC)
UCSC_RefGene_Accession	Accession number (UCSC)
UCSC_RefGene_Group	Gene region feature category (UCSC)
UCSC_CpG_Islands_Name	CpG island name (UCSC)
Relation_to_UCSC_CpG_Island	Relationship to Canonical CpG Island: Shores - 0-2 kb from CpG island; Shelves - 2-4 kb from CpG island
Phantom	FANTOM-derived promoter
DMR	Differentially methylated region (experimentally determined)
Enhancer	Enhancer element (informatically-determined)
Regulatory_Feature_Name	Regulatory feature (informatically determined)
Regulatory_Feature_Group	Regulatory feature category
DHS	DNAse hypersensitive site (experimentally determined)
IlmnID	logFC	P.Value	adj.P.Val	Genome_Build	CHR	MAPINFO	Strand	UCSC_RefGene_Name	UCSC_RefGene_Accession	UCSC_RefGene_Group	UCSC_CpG_Islands_Name	Relation_to_UCSC_CpG_Island	Phantom	DMR	Enhancer	Regulatory_Feature_Name	Regulatory_Feature_Group	DHS
cg00000029	0.814925	0.00110865	0.00746823	37	16	53468112	F	RBL2	NM_005611	TSS1500	chr16:53468284-53469209	N_Shore			NA	16:53467838-53469685	Promoter_Associated	TRUE
cg00000363	-0.675531	0.000656214	0.0047297	37	1	230560793	F				chr1:230561103-230562702	N_Shore			NA			NA
cg00000622	-0.227733	0.000841671	0.00587805	37	15	23034447	F	NIPA2;NIPA2;NIPA2;NIPA2	NM_001008860;NM_030922;NM_001008892;NM_001008894	TSS200;TSS200;TSS200;TSS200	chr15:23033933-23034710	Island			NA	15:23033272-23034847	Promoter_Associated	NA
cg00000721	0.618347	3.48792e-05	0.000352285	37	6	25282779	R	LRRC16A	NM_017640	Body	chr6:25279131-25279890	S_Shelf			NA	6:25282760-25283239	Unclassified_Cell_type_specific	NA
cg00000807	0.631841	0.000119003	0.00105194	37	2	23913414	F	KLHL29	NM_052920	Body	chr2:23913308-23913569	Island			NA			NA
cg00000948	-0.529342	0.000308625	0.00244115	37	8	49890609	F				chr8:49890386-49890874	Island			NA			NA
cg00001099	1.15107	4.75384e-06	5.8419e-05	37	8	87081553	F	PSKH2	NM_033126	Body	chr8:87081653-87082046	N_Shore			NA			NA
cg00001249	1.94298	1.23825e-14	7.56044e-13	37	14	60389786	F				chr14:60386271-60386750	S_Shelf			NA			NA
cg00002449	-1.19272	1.31013e-10	3.88707e-09	37	10	28961565	F				chr10:28957408-28958116	S_Shelf			NA			NA
cg00003513	2.54451	1.43397e-21	3.53128e-19	37	1	10757436	F	CASZ1;CASZ1	NM_001079843;NM_017766	5'UTR;5'UTR	chr1:10757891-10758252	N_Shore			NA	1:10756925-10757460	Unclassified_Cell_type_specific	NA
cg00003529	0.703198	0.00071915	0.0051231	37	3	149510115	R	C3orf16	NM_001144960	1stExon					NA			NA
cg00003858	0.8035	6.96556e-05	0.000652843	37	1	45080600	R	RNF220	NM_018150	Body	chr1:45082739-45083285	N_Shelf			NA			NA
cg00004105	-0.874722	1.62768e-05	0.000177551	37	10	100022608	F	LOXL4	NM_032211	Body					NA	10:100022326-100022665	Unclassified_Cell_type_specific	TRUE
cg00004562	1.97538	2.08196e-23	7.50029e-21	37	6	31089293	R	CDSN;PSORS1C1	NM_001264;NM_014068	TSS1500;5'UTR					NA			NA
cg00004996	0.87934	4.75571e-05	0.000464326	37	8	17271535	F	MTMR7	NM_004686	TSS1500	chr8:17270603-17271120	S_Shore		RDMR	NA			NA
cg00005215	0.838097	0.000372235	0.0028801	37	18	61223377	R	SERPINB12	NM_080474	TSS200					NA			NA
cg00005619	0.553966	2.6074e-07	4.1537e-06	37	11	47608722	R	FAM180B	NM_001164379	Body	chr11:47611138-47612438	N_Shelf			NA			NA
cg00005861	2.03534	6.36635e-13	2.84955e-11	37	10	112068221	F				chr10:112064137-112064859	S_Shelf			NA			NA
cg00006198	-1.39268	5.57825e-08	1.01511e-06	37	1	154476306	F	TDRD10;TDRD10	NM_182499;NM_001098475	5'UTR;5'UTR	chr1:154474107-154475699	S_Shore			NA			NA
cg00006626	-0.696862	3.51542e-06	4.44611e-05	37	1	154127462	R	NUP210L;NUP210L	NM_001159484;NM_207308	1stExon;1stExon					TRUE			NA
cg00007420	1.68786	3.27165e-12	1.2912e-10	37	6	99796732	R	C6orf168	NM_032511	Body	chr6:99797208-99797946	N_Shore			NA			NA
cg00007675	1.10833	4.18556e-06	5.20567e-05	37	8	37606579	R	LOC728024;ERLIN2	NR_003671;NM_007175	TSS1500;Body					NA			NA
cg00008036	0.65756	0.000134586	0.00117267	37	1	179712091	R	FAM163A	NM_173509	TSS1500	chr1:179711947-179713951	Island		DMR	NA	1:179711768-179712249	Unclassified_Cell_type_specific	TRUE
cg00008446	0.549545	0.00035947	0.00279263	37	1	156815774	F	NTRK1;INSRR	NM_001007792;NM_014215	Body;Body	chr1:156814881-156815792	Island			NA	1:156815702-156815942	Unclassified_Cell_type_specific	NA
cg00008564	-0.586726	0.00115601	0.00774416	37	6	27830391	F				chr6:27833120-27833406	N_Shelf			NA			NA
cg00008612	0.980536	1.59745e-10	4.66585e-09	37	13	60726243	R	DIAPH3	NM_001042517	Body					TRUE			NA
cg00008621	1.04184	1.97859e-10	5.67186e-09	37	14	62179983	F	HIF1A;HIF1A	NM_001530;NM_181054	Body;Body					TRUE			NA
cg00008629	1.30407	3.04249e-05	0.000311266	37	9	115093661	R	ROD1;ROD1;ROD1	NM_001163790;NM_005156;NM_001163788	Body;Body;5'UTR	chr9:115095149-115095919	N_Shore			NA	9:115093506-115093751	Promoter_Associated_Cell_type_specific	NA
cg00009053	1.64216	2.78109e-11	9.29165e-10	37	11	61283865	R	SYT7	NM_004200	3'UTR	chr11:61283864-61284147	Island			TRUE	11:61283818-61285355	Unclassified	NA
cg00009412	-0.260603	0.00144481	0.00940102	37	2	118572392	R	DDX18	NM_006773	1stExon	chr2:118572112-118572627	Island			NA	2:118571586-118572974	Promoter_Associated	NA
cg00009421	-0.608185	0.000224185	0.00183917	37	2	44065571	F	ABCG5;ABCG8	NM_022436;NM_022437	Body;TSS1500					NA			NA
cg00009750	2.04525	2.78011e-07	4.40356e-06	37	2	202730892	F	CDK15	NM_139158	Body					TRUE			NA
cg00010954	-1.06683	1.48171e-06	2.02591e-05	37	16	54620055	R								TRUE			NA
cg00011122	-0.31235	0.00131452	0.00865912	37	16	11439027	R	C16orf75	NM_152308	TSS1500	chr16:11439186-11439767	N_Shore			NA	16:11438603-11440065	Promoter_Associated	NA
cg00011482	1.50815	2.54896e-12	1.02492e-10	37	14	37128790	R	PAX9	NM_006194	5'UTR	chr14:37126786-37128274	S_Shore		RDMR	NA			NA
cg00011616	-2.29746	9.66477e-08	1.67859e-06	37	17	75672423	F								NA			NA
cg00011861	1.07043	1.85755e-06	2.49044e-05	37	14	103607265	F				chr14:103604539-103605504	S_Shore			NA	14:103607091-103608074	Unclassified	TRUE
cg00012362	-0.842447	0.000126192	0.00110801	37	1	153599487	R	S100A13;S100A13;S100A13;S100A13;S100A1;S100A13;S100A13	NM_005979;NM_001024213;NM_001024211;NM_001024213;NM_006271;NM_001024210;NM_001024212	5'UTR;1stExon;5'UTR;5'UTR;TSS1500;5'UTR;5'UTR					TRUE	1:153599380-153599533	Unclassified_Cell_type_specific	NA
cg00012638	1.66597	2.96974e-07	4.67831e-06	37	6	39280541	F	KCNK17;KCNK17	NM_031460;NM_001135111	Body;Body	chr6:39281135-39282215	N_Shore			NA			NA
cg00013015	2.14882	2.05483e-20	3.96015e-18	37	6	33866316	R								NA			NA
cg00013451	-0.833661	0.00113506	0.00762274	37	8	23711589	R	STC1	NM_003155	Body					NA	8:23710894-23712143	Unclassified_Cell_type_specific	TRUE
cg00013660	0.881988	1.74478e-05	0.000188864	37	9	140068770	R				chr9:140068792-140069082	N_Shore			NA			NA
cg00013804	0.541184	0.000475627	0.00357028	37	2	9358577	R	ASAP2;ASAP2	NM_001135191;NM_003887	Body;Body					TRUE			NA
cg00014445	0.597712	4.58363e-05	0.000449376	37	1	44034053	F	PTPRF;PTPRF	NM_002840;NM_130440	Body;Body	chr1:44031286-44031853	S_Shelf			NA			NA
cg00014484	-3.00545	1.40912e-14	8.49691e-13	37	12	131865279	F								TRUE			NA
cg00014733	0.519365	0.000184789	0.00155057	37	22	29730659	R	AP1B1;SNORD125;AP1B1;AP1B1	NM_001166019;NR_003686;NM_001127;NM_145730	Body;TSS1500;Body;Body					NA			NA
cg00014900	0.581671	6.77549e-07	9.93411e-06	37	1	44438411	R	DPH2;DPH2	NM_001039589;NM_001384	3'UTR;3'UTR	chr1:44440142-44441256	N_Shore			NA			NA
cg00015121	0.606332	0.000118379	0.0010471	37	14	24024633	R	THTPA;THTPA;THTPA	NR_023314;NM_024328;NM_001126339	TSS1500;TSS1500;TSS1500	chr14:24025006-24025577	N_Shore			NA	14:24024493-24024700	Unclassified_Cell_type_specific	NA
cg00016255	1.17832	4.06601e-06	5.07199e-05	37	17	41133928	F	AARSD1;AARSD1;RUNDC1;AARSD1	NM_001142653;NM_001136042;NM_173079;NM_001142654	TSS1500;TSS1500;Body;TSS1500	chr17:41132462-41133367	S_Shore			NA	17:41133840-41133980	Promoter_Associated	NA
cg00016913	1.73484	1.18532e-14	7.25902e-13	37	17	27369892	R	PIPOX	NM_016518	TSS200					NA			NA
cg00017062	0.989064	4.44661e-07	6.75991e-06	37	15	70669548	R								TRUE			TRUE
cg00017221	-0.95025	0.00041105	0.00314275	37	1	149719536	R				chr1:149719314-149719640	Island		DMR	NA			NA
cg00017429	-1.25878	1.92e-12	7.90015e-11	37	14	98170160	R								TRUE			NA
cg00017461	1.85385	3.57625e-10	9.79494e-09	37	22	30663316	R	OSM	NM_020530	TSS1500					NA	22:30663304-30663354	Promoter_Associated	NA
cg00017546	0.55994	2.33743e-05	0.000245769	37	1	28659475	F	MED18;MED18	NM_017638;NM_001127350	Body;Body	chr1:28655365-28655667	S_Shelf			NA			NA
cg00017826	-2.27703	7.62386e-08	1.35146e-06	37	2	30644955	R								TRUE	2:30644398-30645729	Unclassified_Cell_type_specific	NA
cg00018010	-2.42569	1.29812e-08	2.66714e-07	37	17	20105626	R	CYTSB;CYTSB;CYTSB;CYTSB	NM_001033554;NM_152904;NM_001033555;NM_001033553	Body;Body;Body;Body					TRUE			NA
cg00018044	0.953705	1.59441e-06	2.16641e-05	37	18	19109496	R	ESCO1	NM_052911	3'UTR					NA			NA
cg00018198	2.33618	5.90041e-16	4.62022e-14	37	2	65297247	R	CEP68	NM_015147	Body					TRUE	2:65296986-65297635	Gene_Associated_Cell_type_specific	NA
cg00018229	0.823074	0.000688594	0.00493206	37	1	231113419	R	TTC13;ARV1;TTC13	NM_001122835;NM_022786;NM_024525	Body;TSS1500;Body	chr1:231113871-231114873	N_Shore			NA			NA
cg00018845	-2.78237	1.04876e-15	7.78464e-14	37	14	38067965	R				chr14:38067446-38069207	Island			NA	14:38067527-38068063	Unclassified_Cell_type_specific	TRUE
cg00019076	0.195497	0.0014539	0.00945038	37	16	85670772	R	KIAA0182;KIAA0182	NM_001134473;NM_014615	5'UTR;Body	chr16:85670134-85670349	S_Shore			NA			NA
cg00019118	-0.657005	3.62896e-05	0.000365102	37	12	132851518	F	GALNT9;LOC100130238	NM_001122636;NR_024563	Body;TSS1500	chr12:132853943-132854190	N_Shelf			TRUE			TRUE
cg00019458	-1.50886	3.87607e-12	1.51348e-10	37	1	7887942	F	PER3	NM_016831	Body	chr1:7887198-7887476	S_Shore			NA			NA
cg00019678	1.95377	3.74897e-11	1.22366e-09	37	12	110154229	R	C12orf34	NM_032829	5'UTR	chr12:110151327-110152758	S_Shore			TRUE			NA
cg00019826	-0.896693	4.48525e-07	6.81306e-06	37	4	1554149	R				chr4:1554465-1554678	N_Shore			NA			NA
cg00020348	-0.393473	0.0003796	0.00293058	37	7	142749542	R	OR6V1	NM_001001667	1stExon					NA			NA
cg00021275	-0.349652	0.00100073	0.00683482	37	2	128142155	F				chr2:128145117-128145897	N_Shelf			NA			NA
cg00021476	1.9974	1.42101e-11	5.0073e-10	37	16	85660215	R	KIAA0182;KIAA0182	NM_001134473;NM_014615	5'UTR;Body	chr16:85658742-85658998	S_Shore			TRUE			TRUE
cg00021933	1.76746	1.18545e-13	6.05498e-12	37	1	86082316	R				chr1:86081700-86082068	S_Shore			NA			NA
cg00022054	-0.666512	2.15596e-05	0.000228478	37	1	48177261	R				chr1:48174494-48176519	S_Shore		RDMR	NA			NA
cg00022235	1.34662	2.73013e-11	9.13486e-10	37	16	11764847	R	SNN	NM_003498	5'UTR	chr16:11762563-11763246	S_Shore			NA	16:11763953-11764951	Unclassified	NA
cg00022871	-1.42831	4.17958e-07	6.38993e-06	37	17	43884358	R	CRHR1;CRHR1;CRHR1;CRHR1	NM_001145148;NM_004382;NM_001145147;NM_001145146	Body;Body;Body;Body					NA			NA
cg00023174	-0.52178	0.00145729	0.0094692	37	19	12202386	R	ZNF788	NR_027049	TSS1500	chr19:12203028-12203503	N_Shore			NA			NA
cg00024416	0.807749	0.000133425	0.0011639	37	22	24240387	F				chr22:24236257-24237539	S_Shelf			NA	22:24240250-24240481	Unclassified_Cell_type_specific	NA
cg00024443	0.658917	1.60646e-05	0.000175476	37	16	21569473	R								NA			NA
cg00024471	0.644894	0.00151497	0.00978856	37	3	188692547	F								TRUE	3:188692544-188692744	Unclassified_Cell_type_specific	NA
cg00024494	3.16594	1.53591e-20	3.05835e-18	37	16	73096842	R				chr16:73096888-73097115	N_Shore		RDMR	NA			NA
cg00024967	3.22347	1.47559e-11	5.18393e-10	37	3	169377818	R	MECOM	NM_004991	Body	chr3:169379437-169381056	N_Shore		RDMR	NA			NA
cg00024989	1.22751	0.000395773	0.00303962	37	19	17902242	F				chr19:17905579-17906317	N_Shelf			NA			NA
cg00025643	1.09949	2.03169e-07	3.31122e-06	37	1	37904694	R								TRUE			NA
cg00025795	1.4049	6.80318e-13	3.02978e-11	37	17	77983156	R	TBC1D16	NM_019020	Body	chr17:77983980-77984482	N_Shore			NA	17:77981403-77983388	Unclassified	NA
cg00026362	1.15755	4.44776e-08	8.26113e-07	37	6	43858741	F	LOC100132354	NR_024478	TSS200					TRUE			NA
cg00026412	-0.44219	0.000535402	0.0039608	37	10	62059894	R	ANK3	NM_020987	Body					TRUE	10:62059822-62059989	Unclassified_Cell_type_specific	NA
cg00026553	1.05235	7.92666e-12	2.92536e-10	37	15	90562839	R	ZNF710	NM_198526	5'UTR					TRUE			NA
cg00026603	1.75165	3.20338e-10	8.84284e-09	37	13	73141877	F								TRUE			NA
cg00027114	1.883	4.17451e-09	9.39037e-08	37	7	42740486	F								TRUE			NA
cg00027729	-0.687225	1.07354e-05	0.000122064	37	16	31285773	F	ITGAM;ITGAM	NM_001145808;NM_000632	Body;Body					NA			NA
cg00028135	-0.845735	3.38529e-06	4.29618e-05	37	3	114343673	F	ZBTB20;ZBTB20;ZBTB20;ZBTB20;ZBTB20;ZBTB20	NM_001164345;NM_001164346;NM_001164347;NM_001164344;NM_015642;NM_001164343	5'UTR;5'UTR;TSS1500;5'UTR;5'UTR;5'UTR					NA			TRUE
cg00028211	1.58807	2.80637e-07	4.44204e-06	37	2	45028802	F				chr2:45028955-45029318	N_Shore		RDMR	NA			NA
cg00028318	0.481753	4.0365e-06	5.039e-05	37	6	29570739	F	GABBR1;GABBR1;GABBR1	NM_021904;NM_021903;NM_001470	3'UTR;3'UTR;3'UTR					NA	6:29570625-29571174	Unclassified_Cell_type_specific	NA
cg00028429	-1.91702	9.80796e-11	2.97002e-09	37	15	101273479	R								TRUE			NA
cg00028431	-1.20178	1.83611e-09	4.40948e-08	37	8	125564372	F	MTSS1	NM_014751	3'UTR					NA			NA
cg00028515	2.18051	4.47844e-21	9.9473e-19	37	3	187548756	F								TRUE			NA
cg00028993	-0.496652	0.000935786	0.00644722	37	19	48247714	R	GLTSCR2	NM_015710	TSS1500	chr19:48248729-48249110	N_Shore			NA	19:48247566-48247753	Promoter_Associated	NA
cg00029282	-0.691854	0.000626982	0.00454674	37	2	95941820	F	PROM2;PROM2;PROM2	NM_001165977;NM_001165978;NM_144707	Body;Body;Body					NA			NA
cg00029825	-0.9407	0.00018065	0.00151981	37	16	31500439	R	SLC5A2	NM_003041	Body	chr16:31498650-31500564	Island			NA			TRUE
cg00029973	0.391754	0.000690758	0.00494525	37	17	3501741	F	TRPV1;TRPV1	NM_018727;NM_080704	TSS1500;5'UTR					NA			NA
cg00030047	-1.62789	1.77946e-09	4.28174e-08	37	1	6268790	R	RNF207	NM_207396	Body	chr1:6268820-6269588	N_Shore			TRUE	1:6267663-6270376	Promoter_Associated	TRUE
cg00030296	1.58706	4.40831e-18	5.20929e-16	37	17	75318732	R	SEPT9;SEPT9;SEPT9	NM_001113492;NM_001113491;NM_006640	5'UTR;Body;Body					TRUE			NA
cg00030508	-1.31085	7.36409e-05	0.000685891	37	6	30139542	F	TRIM15	NM_033229	Body	chr6:30139718-30140263	N_Shore			TRUE	6:30137754-30140152	Unclassified	NA
cg00030795	-0.316955	0.000130232	0.00113907	37	6	33422380	R	ZBTB9;ZBTB9	NM_152735;NM_152735	5'UTR;1stExon	chr6:33422046-33422530	Island	high-CpG:33530297-33530404		NA	6:33420954-33422707	Promoter_Associated	NA
cg00030807	1.53164	8.70879e-14	4.55727e-12	37	8	1786072	R	ARHGEF10	NM_014629	5'UTR					NA	8:1785796-1786117	Unclassified_Cell_type_specific	NA
cg00031105	1.33877	6.87151e-13	3.05887e-11	37	6	33166117	R	RXRB	NM_021976	Body	chr6:33167885-33168715	N_Shore			NA	6:33165168-33166317	Gene_Associated	NA
cg00031162	-0.631534	0.000164411	0.00139863	37	17	7453377	R	TNFSF12;TNFSF12-TNFSF13	NM_003809;NM_172089	Body;Body	chr17:7452150-7452645	S_Shore			TRUE	17:7451854-7453481	Unclassified	TRUE
cg00031256	-0.306952	0.000506649	0.00377211	37	6	2842255	R	SERPINB1	NM_030666	TSS200	chr6:2841810-2842273	Island	high-CpG:2787068-2787272		NA	6:2841306-2842601	Promoter_Associated_Cell_type_specific	TRUE
cg00031402	0.45154	0.000796133	0.00560175	37	10	73612154	F	PSAP;PSAP;PSAP	NM_002778;NM_001042465;NM_001042466	TSS1500;TSS1500;TSS1500	chr10:73610661-73611145	S_Shore			NA			NA
cg00031491	-0.454204	0.00134706	0.00884459	37	6	31837439	R	SLC44A4	NM_025257	Body					NA			NA
cg00031708	0.703595	0.000285781	0.00227885	37	7	23051361	R	FAM126A	NM_032581	5'UTR	chr7:23052971-23054002	N_Shore			NA			NA
cg00031896	0.485515	2.35057e-05	0.000247004	37	12	122020205	R	KDM2B	NM_032590	TSS1500	chr12:122018170-122018457	S_Shore	low-CpG:120504543-120504591		NA	12:122019013-122020752	Promoter_Associated	NA
cg00032205	1.07512	0.00094201	0.00648451	37	8	98290372	F	TSPYL5	NM_033512	TSS200	chr8:98289604-98290404	Island			NA	8:98289986-98290577	Promoter_Associated	TRUE
cg00033490	-0.336388	5.18316e-05	0.000500868	37	7	87027887	F	CROT;CROT	NM_021151;NM_001143935	Body;Body					TRUE			NA
cg00033773	0.623602	1.76281e-05	0.000190608	37	19	12779366	R	MORG1;MORG1;C19orf56;MORG1	NM_032332;NM_001099737;NM_016145;NR_029375	TSS1500;5'UTR;Body;Body	chr19:12779795-12781094	N_Shore			NA			NA
cg00034101	1.14678	6.51951e-06	7.78394e-05	37	1	40098595	R	HEYL	NM_014571	Body					TRUE			TRUE
cg00034416	-0.269143	0.000707096	0.00504702	37	1	155278724	R	FDPS;FDPS;FDPS;FDPS;FDPS;FDPS	NM_001135822;NM_002004;NM_001135821;NM_002004;NM_001135822;NM_001135821	5'UTR;1stExon;1stExon;5'UTR;1stExon;5'UTR	chr1:155278407-155278743	Island	high-CpG:153545235-153545366		NA	1:155278101-155279443	Promoter_Associated	NA
cg00035316	4.13318	2.39604e-13	1.15745e-11	37	2	176993017	F	HOXD8	NM_019558	TSS1500	chr2:176992950-176993186	Island			NA			NA
cg00035347	0.936808	0.000526592	0.0039044	37	10	104953608	F	NT5C2;NT5C2	NM_012229;NM_001134373	TSS1500;TSS1500	chr10:104952242-104953232	S_Shore			NA			NA
cg00035630	1.62554	7.74006e-08	1.36992e-06	37	11	33036664	R	DEPDC7;DEPDC7	NM_139160;NM_001077242	TSS1500;TSS1500	chr11:33037206-33037917	N_Shore			NA			NA
cg00036110	1.0954	2.51331e-05	0.000262347	37	1	40146660	F	HPCAL4	NM_016257	3'UTR	chr1:40149431-40150013	N_Shelf			NA	1:40146493-40147300	Unclassified_Cell_type_specific	NA
cg00036588	4.18336	5.07013e-34	2.83236e-30	37	20	35275710	R	SLA2;SLA2	NM_032214;NM_175077	TSS1500;TSS1500					NA			NA
cg00036732	-0.626036	0.000395704	0.00303915	37	10	102767507	R	LZTS2	NM_032429	3'UTR	chr10:102766321-102766693	S_Shore			TRUE			NA
cg00036976	1.02976	4.4491e-10	1.19831e-08	37	16	85343281	F								NA			NA
cg00037457	-2.3416	2.7668e-06	3.57638e-05	37	17	59531744	R				chr17:59531723-59535254	Island		RDMR	NA	17:59531687-59532567	Unclassified_Cell_type_specific	NA
cg00038342	0.442121	4.541e-05	0.000445668	37	2	1651130	R	PXDN	NM_012293	Body	chr2:1651995-1653401	N_Shore			NA			NA
cg00038736	-1.03256	0.000846765	0.00590883	37	19	38877134	F	GGN	NM_152657	Body	chr19:38876614-38878950	Island			NA			NA
cg00038857	-1.39044	1.27045e-07	2.15517e-06	37	17	32645753	R	CCL8	NM_005623	TSS1500					NA			NA
cg00039147	-0.578325	0.000414404	0.00316536	37	17	35194628	R								TRUE			NA
cg00039326	0.586182	0.00146075	0.00948707	37	1	36615845	F	TRAPPC3	NM_014408	TSS1500	chr1:36614855-36615462	S_Shore			TRUE	1:36614198-36616219	Promoter_Associated	NA
cg00039936	0.529036	0.000305376	0.00241757	37	19	50267881	R	TSKS	NM_021733	TSS1500	chr19:50269632-50270505	N_Shore			NA			NA
cg00040312	-6.73986	6.05516e-18	6.97744e-16	37	12	54424679	F	HOXC4;HOXC5	NM_014620;NR_003084	5'UTR;Body	chr12:54424610-54425173	Island			NA	12:54424046-54425649	Unclassified_Cell_type_specific	NA
cg00040322	1.01968	1.76708e-09	4.25623e-08	37	2	11240641	R								NA			NA
cg00040708	0.818129	2.36228e-08	4.61307e-07	37	3	49838627	R	CDH29	NM_001007540	TSS1500	chr3:49840103-49841191	N_Shore			NA			NA
cg00040837	1.11242	0.000111967	0.000997438	37	1	236081097	F							DMR	TRUE	1:236080720-236081208	Unclassified	TRUE
cg00040862	-0.833186	4.42947e-06	5.47995e-05	37	2	1416889	R	TPO;TPO;TPO;TPO	NM_175721;NM_175719;NM_000547;NM_175722	TSS1500;TSS1500;TSS1500;TSS1500					NA			NA
cg00041014	1.27478	5.79839e-08	1.05126e-06	37	1	52498044	F	KTI12;TXNDC12;KTI12	NM_138417;NM_015913;NM_138417	3'UTR;Body;1stExon	chr1:52498452-52499505	N_Shore			NA			NA
cg00042059	2.42151	3.11709e-13	1.47941e-11	37	2	55087588	F	EML6	NM_001039753	Body					TRUE			TRUE
cg00042156	-0.897349	0.000122547	0.00107908	37	10	42970842	F	LOC84856	NR_026827	TSS200	chr10:42971195-42971834	N_Shore			NA			TRUE
cg00042254	0.908321	1.89113e-06	2.53138e-05	37	1	46019963	R	AKR1A1;AKR1A1	NM_006066;NM_153326	5'UTR;5'UTR	chr1:46016403-46016694	S_Shelf			NA			NA
cg00042837	0.716302	1.50837e-05	0.000165836	37	17	37028650	R	LASP1	NM_006148	Body	chr17:37025737-37027104	S_Shore		RDMR	NA			NA
cg00043800	0.66739	1.2188e-05	0.000136942	37	2	74612144	R	LOC100189589	NR_024463	TSS1500					NA			NA
cg00044097	1.40862	1.09776e-12	4.71781e-11	37	2	106055153	F	FHL2;FHL2	NM_201557;NM_201557	1stExon;5'UTR					TRUE			NA
cg00044466	-1.29891	6.61309e-09	1.43625e-07	37	16	15238525	R								NA			NA
cg00044665	-0.854805	7.18227e-05	0.000670503	37	16	66400411	F	CDH5	NM_001795	TSS200					NA			NA
cg00044995	0.630912	0.00154373	0.00995006	37	19	408683	F	C2CD4C	NM_001136263	5'UTR	chr19:407011-409511	Island			NA			NA
cg00045275	-0.855383	0.000385395	0.00296942	37	1	43389643	F				chr1:43389835-43390551	N_Shore			NA			NA
cg00045753	0.647592	1.58588e-07	2.63798e-06	37	9	123630545	F	PHF19	NM_015651	Body	chr9:123631106-123631672	N_Shore			NA			NA
cg00045762	-2.0036	1.58442e-11	5.53093e-10	37	5	167181762	F	ODZ2	NM_001122679	Body					NA			NA
cg00046026	-0.503947	0.000226356	0.00185452	37	20	61950761	R	COL20A1	NM_020882	Body	chr20:61951346-61951549	N_Shore			NA			NA
cg00046156	-1.35468	4.20092e-05	0.000415481	37	5	2109785	F				chr5:2111836-2112484	N_Shelf			NA			NA
cg00046537	0.958757	1.35935e-10	4.01934e-09	37	5	134210707	R	TXNDC15	NM_024715	Body	chr5:134209887-134210504	S_Shore			NA	5:134209182-134211171	Promoter_Associated	NA
cg00046802	0.507799	0.000414385	0.00316528	37	9	130460675	R				chr9:130461543-130461839	N_Shore			NA			NA
cg00046899	1.21517	3.07571e-10	8.51403e-09	37	13	97777690	R								TRUE	13:97777624-97778473	Unclassified_Cell_type_specific	NA
cg00047694	-1.78268	3.58429e-15	2.41282e-13	37	16	86377053	R	LOC732275	NR_024406	Body					TRUE			TRUE
cg00048436	2.79193	4.48369e-19	6.44508e-17	37	5	32709071	F				chr5:32709910-32714450	N_Shore		RDMR	NA			NA
cg00049156	1.22287	7.96451e-06	9.3241e-05	37	1	93643903	R	TMED5;TMED5;TMED5	NM_016040;NR_030761;NM_001167830	Body;Body;Body	chr1:93645432-93646471	N_Shore			NA			NA
cg00049440	1.22429	0.000459333	0.00346475	37	9	73026643	R	KLF9	NM_001206	Body	chr9:73027330-73029184	N_Shore		CDMR	NA			NA
cg00049475	-2.16926	2.71326e-13	1.30036e-11	37	10	29923736	R	SVIL;SVIL;SVIL	NM_021738;NM_021738;NM_003174	5'UTR;1stExon;5'UTR					NA			NA
cg00049616	2.84725	8.8526e-20	1.49258e-17	37	13	100308186	F	CLYBL	NM_206808	Body	chr13:100310204-100310446	N_Shelf			NA	13:100308080-100309710	Unclassified	NA
cg00049664	1.9311	7.85014e-05	0.00072589	37	16	66613334	R	CMTM2	NM_144673	TSS200	chr16:66612749-66613412	Island			NA	16:66612785-66613385	Unclassified_Cell_type_specific	NA
cg00049729	1.14264	6.38966e-09	1.39113e-07	37	5	55776345	R				chr5:55776604-55777233	N_Shore		CDMR	TRUE			TRUE
cg00049868	-1.14396	0.000410836	0.00314117	37	2	11245407	F								NA			NA
cg00049883	2.734	5.46004e-11	1.72888e-09	37	16	5554273	F							DMR	NA			NA
cg00049892	-0.90195	5.75991e-06	6.95562e-05	37	6	132162773	F	ENPP1	NM_006208	Body					TRUE			NA
cg00050294	-1.02096	6.08999e-07	9.00838e-06	37	1	2886818	F				chr1:2886589-2886923	Island			NA			NA
cg00050402	0.959208	6.46714e-06	7.72707e-05	37	7	55073022	F				chr7:55072962-55073433	Island			NA			NA
cg00050482	0.955613	0.00101981	0.00694967	37	16	73207213	F								TRUE	16:73206087-73208073	Unclassified_Cell_type_specific	NA
cg00050496	1.21692	3.01094e-08	5.76547e-07	37	12	110211701	R	MGC14436;MGC14436	NR_026662;NR_026661	TSS1500;TSS1500					NA			NA
cg00051307	-2.9995	3.58284e-20	6.57855e-18	37	5	72524193	R				chr5:72526203-72526497	N_Shelf			NA			NA
cg00051371	-0.784755	0.000895311	0.00620168	37	7	75442678	R	CCL24	NM_002991	Body					NA			NA
cg00052385	-0.61465	8.83603e-05	0.000807659	37	8	134580580	F	ST3GAL1;ST3GAL1	NM_003033;NM_173344	5'UTR;5'UTR	chr8:134581969-134584875	N_Shore			NA			NA
cg00053755	1.36122	0.000143391	0.00124034	37	5	139728711	F				chr5:139725530-139726234	S_Shelf			NA			NA
cg00053927	-0.753193	0.000346008	0.00269993	37	13	113699014	R	MCF2L;MCF2L	NM_001112732;NM_024979	Body;Body	chr13:113701833-113702280	N_Shelf	low-CpG:112746908-112747037		NA			TRUE
cg00054197	0.660184	2.86049e-08	5.49985e-07	37	5	171765750	F	SH3PXD2B	NM_001017995	Body	chr5:171766422-171766826	N_Shore	low-CpG:171698226-171698607		NA			NA
cg00054210	1.55879	0.000380102	0.00293413	37	8	65711644	R	CYP7B1	NM_004820	TSS1500	chr8:65710990-65711722	Island			NA			NA
cg00054301	0.691655	0.000120462	0.00106317	37	16	67237548	F	ELMO3;MIR328	NM_024712;NR_029887	Body;TSS1500	chr16:67233032-67233862	S_Shelf			NA			NA
cg00054774	0.667458	0.000173823	0.00146898	37	21	43373079	F	C2CD2	NM_015500	Body	chr21:43373135-43374062	N_Shore			NA	21:43372665-43373338	Unclassified_Cell_type_specific	NA
cg00055052	0.510128	0.000213607	0.00176197	37	16	4409748	R	CORO7	NM_024535	Body					TRUE	16:4408371-4409837	Gene_Associated	NA
cg00055341	1.18213	9.85015e-11	2.98147e-09	37	2	200446845	R								TRUE			NA
cg00055603	2.24972	9.35814e-17	8.49574e-15	37	1	48508839	R								TRUE			NA
cg00055771	-0.822762	3.59295e-07	5.57097e-06	37	5	144510462	F								TRUE			NA
cg00055981	0.509726	0.000656538	0.00473163	37	9	139228737	F	GPSM1;GPSM1	NM_001145638;NM_015597	Body;Body	chr9:139228816-139229229	N_Shore			NA			NA
cg00055986	-1.36311	3.76441e-07	5.80832e-06	37	5	2537520	R								NA			NA
cg00057240	1.05494	9.89914e-05	0.000893873	37	2	191398360	R	TMEM194B	NM_001142645	Body	chr2:191399089-191399742	N_Shore			NA			NA
cg00057272	1.11874	0.000156521	0.00133922	37	8	135726252	R	ZFAT	NM_020863	TSS1500	chr8:135724770-135725552	S_Shore		CDMR	NA			NA
cg00057667	1.34994	4.58985e-05	0.000449877	37	6	140069730	R								TRUE			NA
cg00057722	0.70488	0.000127849	0.00112082	37	18	45934156	F				chr18:45934453-45937265	N_Shore		RDMR	NA			NA
cg00058879	-1.99408	4.01156e-14	2.23274e-12	37	22	40082173	F	CACNA1I;CACNA1I	NM_001003406;NM_021096	Body;Body	chr22:40081519-40082390	Island			NA	22:40081445-40082681	Unclassified_Cell_type_specific	NA
cg00058887	-1.6834	4.84324e-07	7.30894e-06	37	4	184909018	F	STOX2	NM_020225	Body					TRUE			TRUE
cg00059225	-0.90796	3.49459e-05	0.000352906	37	5	151304357	F	GLRA1;GLRA1;GLRA1;GLRA1	NM_000171;NM_001146040;NM_000171;NM_001146040	1stExon;1stExon;5'UTR;5'UTR	chr5:151304226-151304824	Island			TRUE	5:151304175-151304431	Unclassified_Cell_type_specific	TRUE
cg00059459	3.37331	2.87598e-19	4.32143e-17	37	1	8343575	R								TRUE	1:8343382-8343653	Unclassified_Cell_type_specific	NA
cg00059652	1.70325	6.63148e-11	2.07309e-09	37	17	67605498	F								TRUE			NA
cg00059707	-0.694113	0.00093868	0.00646487	37	10	2540911	F				chr10:2543463-2544121	N_Shelf			NA			NA
cg00060061	0.706893	0.000128769	0.00112799	37	8	112636613	R								NA			NA
cg00060484	-0.719359	4.33013e-05	0.000427027	37	4	3287598	R								NA	4:3287397-3288182	Unclassified	TRUE
cg00060800	-1.56618	7.18529e-12	2.6719e-10	37	5	141600994	R								TRUE			NA
cg00060836	2.36344	8.10518e-22	2.12425e-19	37	8	67834312	R	SNHG6	NR_002599	Body	chr8:67837480-67837954	N_Shelf			NA			NA
cg00061031	-0.80419	4.38811e-06	5.43521e-05	37	9	100744026	R	ANP32B	NM_006401	TSS1500	chr9:100744982-100747768	N_Shore		CDMR	NA			NA
cg00061150	0.557671	5.16207e-06	6.29312e-05	37	8	144918317	F	NRBP2	NM_178564	Body	chr8:144917878-144918318	Island			NA	8:144918124-144918934	Unclassified_Cell_type_specific	NA
cg00061264	0.303657	0.00084485	0.00589752	37	3	23852775	R	UBE2E1;UBE2E1	NM_003341;NM_182666	Body;Body	chr3:23851987-23852508	S_Shore		RDMR	NA	3:23852310-23852969	Promoter_Associated	TRUE
cg00061520	1.89202	2.0671e-09	4.91614e-08	37	16	4070371	F	ADCY9	NM_001116	Body					TRUE			NA
cg00063471	1.69354	2.54297e-10	7.13767e-09	37	15	51385970	R	TNFAIP8L3	NM_207381	Body	chr15:51385861-51387203	Island			NA			TRUE
cg00063535	0.412532	0.000512416	0.00381073	37	12	113729491	R	TPCN1;TPCN1	NM_001143819;NM_017901	Body;Body					TRUE			NA
cg00063828	1.0377	1.39731e-07	2.35048e-06	37	16	85749496	F	C16orf74	NM_206967	Body					TRUE			TRUE
cg00064080	0.777293	2.24663e-05	0.000237074	37	10	122598254	R								TRUE			NA
cg00064255	-0.780366	5.46059e-05	0.000525027	37	1	90100012	R	LRRC8C	NM_032270	5'UTR	chr1:90098230-90099292	S_Shore		RDMR	NA			NA
cg00064336	-2.14106	2.67151e-12	1.06987e-10	37	16	88143970	F								NA			NA
cg00065957	0.96363	5.29792e-09	1.17135e-07	37	1	53099352	R	FAM159A	NM_001042693	Body	chr1:53098629-53099303	S_Shore		CDMR	NA			NA
cg00066508	0.965541	5.52428e-07	8.23852e-06	37	12	110355602	R	TCHP;TCHP	NM_001143852;NM_032300	3'UTR;3'UTR					NA			NA
cg00066554	0.898898	6.01792e-09	1.31688e-07	37	1	160385636	F	VANGL2	NM_020335	Body	chr1:160389103-160389386	N_Shelf			NA			NA
cg00067274	-1.82389	1.32201e-10	3.91859e-09	37	4	155313256	R	DCHS2;DCHS2	NM_017639;NM_001142552	TSS1500;Body					NA			NA
cg00067414	1.20452	2.85202e-08	5.48446e-07	37	6	151188081	R	MTHFD1L	NM_015440	Body	chr6:151186747-151188112	Island			NA	6:151186324-151188293	Promoter_Associated	NA
cg00067518	-1.25722	2.98993e-08	5.72793e-07	37	1	7763225	R	CAMTA1	NM_015215	Body	chr1:7764593-7765856	N_Shore			NA			NA
cg00067600	-0.66404	0.000193518	0.00161468	37	3	34109141	R								TRUE			NA
cg00069014	-0.551752	3.04265e-06	3.90165e-05	37	1	14156840	R								TRUE			NA
cg00069242	0.491243	5.66904e-05	0.000542906	37	14	23450527	F	JUB	NM_032876	1stExon	chr14:23449886-23452174	Island			NA	14:23450413-23450532	Unclassified	NA
cg00069391	-1.77968	8.30478e-10	2.12534e-08	37	7	3419305	F	SDK1	NM_152744	Body					TRUE			NA
cg00069417	-0.89808	4.80661e-07	7.25956e-06	37	16	87874279	F	SLC7A5	NM_003486	Body					NA			NA
cg00069432	1.48811	1.61478e-14	9.65282e-13	37	8	99836388	R	STK3	NM_006281	Body	chr8:99837461-99837936	N_Shore			NA			NA
cg00069771	2.49016	7.61475e-06	8.95242e-05	37	1	233089275	R	C1orf57	NM_032324	Body	chr1:233086191-233086595	S_Shelf			NA			NA
cg00070235	2.04802	1.69734e-10	4.93183e-09	37	16	1682446	F	CRAMP1L	NM_020825	Body					NA			NA
cg00070383	2.4513	1.41553e-19	2.27727e-17	37	4	174429374	F				chr4:174430386-174430861	N_Shore	low-CpG:174665805-174666239	RDMR	TRUE			NA
cg00070870	0.65674	2.22376e-06	2.93444e-05	37	6	30691895	R	TUBB	NM_178014	Body	chr6:30687941-30688213	S_Shelf			NA			NA
cg00071210	0.624701	3.7192e-05	0.000373067	37	6	148736942	R	SASH1	NM_015278	Body					TRUE			NA
cg00071381	0.442009	0.000677133	0.00486233	37	1	119910574	R	HAO2;HAO2	NM_016527;NM_001005783	TSS1500;TSS1500					NA	1:119909778-119911029	Unclassified	NA
cg00071391	-2.28818	6.39899e-15	4.10562e-13	37	4	126560514	R								TRUE			NA
cg00072675	0.406321	0.000520613	0.00386507	37	1	56942628	R				chr1:56943401-56943669	N_Shore			NA			NA
cg00072689	1.22366	1.59438e-07	2.65104e-06	37	17	46681111	R	LOC404266;LOC404266;HOXB6	NR_033204;NR_033201;NM_018952	Body;Body;5'UTR					NA			TRUE
cg00073003	0.880504	0.000154685	0.00132526	37	13	112724583	F	SOX1;SOX1	NM_005986;NM_005986	1stExon;3'UTR	chr13:112726281-112728419	N_Shore			NA	13:112724492-112724761	Unclassified_Cell_type_specific	NA
cg00073010	2.06312	9.23369e-07	1.31916e-05	37	17	17627194	R	RAI1	NM_030665	5'UTR	chr17:17625605-17628500	Island			NA			NA
cg00073460	1.44428	1.96751e-06	2.62483e-05	37	6	149806502	F	ZC3H12D	NM_207360	TSS1500					NA	6:149805583-149806902	Promoter_Associated	NA
cg00073794	-0.685405	2.05661e-08	4.06382e-07	37	2	30041338	R	ALK	NM_004304	Body					NA			NA
cg00074145	1.21107	0.000953168	0.0065517	37	15	53075505	F	ONECUT1	NM_004498	Body	chr15:53076187-53077926	N_Shore		CDMR	NA			TRUE
cg00074348	1.10816	4.27484e-05	0.000422116	37	11	57006273	F	APLNR;APLNR	NM_005161;NR_027991	TSS1500;TSS1500					NA			NA
cg00075103	-1.66372	7.08998e-07	1.03557e-05	37	3	176295392	R								TRUE			NA
cg00075507	1.07648	5.18909e-06	6.32209e-05	37	17	26708226	R	SARM1	NM_015077	Body	chr17:26708225-26708805	Island			NA			NA
cg00075589	-0.25473	0.000492639	0.0036807	37	2	219524515	R	ZNF142;BCS1L;BCS1L	NM_001105537;NM_004328;NM_001079866	TSS1500;5'UTR;5'UTR	chr2:219523901-219524577	Island			NA	2:219524122-219524682	Promoter_Associated	NA
cg00076325	0.907003	5.49202e-11	1.73847e-09	37	2	172974630	F				chr2:172972804-172973242	S_Shore		RDMR	NA			NA
cg00076555	-0.992226	3.10545e-07	4.87514e-06	37	3	49705435	R	BSN	NM_003458	3'UTR					TRUE			NA
cg00076653	-2.5495	1.71009e-20	3.35765e-18	37	4	15341878	R	C1QTNF7	NM_001135170	Body					NA			NA
cg00076774	1.59449	4.25962e-11	1.37569e-09	37	2	45016971	R								TRUE			NA
cg00076936	1.09687	6.23824e-09	1.36079e-07	37	20	35503983	F	C20orf118	NM_080628	TSS1500					NA			NA
cg00077738	0.71562	1.05467e-07	1.81727e-06	37	4	1801866	R	FGFR3;FGFR3;FGFR3	NM_001163213;NM_000142;NM_022965	Body;Body;Body	chr4:1803076-1805672	N_Shore			NA			NA
cg00077904	1.45724	1.3549e-13	6.84928e-12	37	5	151078909	R								TRUE			TRUE
cg00078857	-0.754449	5.43947e-06	6.59993e-05	37	8	49426532	F				chr8:49427074-49427416	N_Shore			NA	8:49426450-49427873	Unclassified	NA
cg00079056	2.23597	2.00938e-30	4.01682e-27	37	9	33239641	R	SUGT1P1;SPINK4	NR_003667;NM_014471	Body;TSS1500					NA			NA
cg00079219	-1.75588	5.14034e-06	6.26925e-05	37	12	54360131	F	HOTAIR	NR_003716	Body	chr12:54360374-54360660	N_Shore			NA			NA
cg00079485	-0.854207	0.000594596	0.00433951	37	17	21320915	F	KCNJ12	NM_021012	3'UTR	chr17:21318650-21320041	S_Shore			NA	17:21320775-21321385	Unclassified_Cell_type_specific	NA
cg00080081	1.40653	1.19037e-09	2.96018e-08	37	17	33701776	F	SLFN11;SLFN11;SLFN11;SLFN11;SLFN11	NM_001104587;NM_152270;NM_001104588;NM_001104590;NM_001104589	TSS1500;TSS1500;TSS1500;TSS1500;TSS1500	chr17:33700487-33700760	S_Shore			NA			NA
cg00080125	-1.02287	4.23537e-07	6.46673e-06	37	17	59490613	F	C17orf82;C17orf82	NM_203425;NM_203425	3'UTR;1stExon	chr17:59488115-59490485	S_Shore			NA			NA
cg00080423	0.776305	1.79851e-05	0.000194082	37	5	1144950	R								NA			NA
cg00080682	-0.935251	6.90052e-05	0.000647356	37	22	51176543	R	ACR	NM_001097	TSS200					NA			NA
cg00081087	0.478451	0.000276787	0.00221445	37	7	34873912	R	AAA1;NPSR1;NPSR1	NR_015356;NM_207173;NM_207172	Body;Body;Body					NA			NA
cg00081602	1.13065	1.33855e-07	2.26085e-06	37	5	72922957	R	RGNEF	NM_001080479	5'UTR	chr5:72921593-72922527	S_Shore		CDMR	NA			NA
cg00081714	1.23218	3.92872e-07	6.03672e-06	37	5	116306180	R								TRUE			NA
cg00081799	-0.475891	1.81488e-05	0.000195637	37	1	6390793	F	ACOT7;ACOT7;ACOT7;ACOT7	NM_181864;NM_181865;NM_007274;NM_181866	Body;Body;Body;Body					NA	1:6390329-6392291	Unclassified	TRUE
cg00081852	1.21269	3.52212e-06	4.45348e-05	37	6	22180818	R	FLJ22536	NR_015410	Body					NA			NA
cg00081919	0.722115	2.73417e-08	5.27689e-07	37	2	43187471	F								TRUE			NA
cg00082140	-0.769486	1.58696e-06	2.15687e-05	37	5	179816766	F				chr5:179816662-179817005	Island			TRUE			NA
cg00082729	-0.821056	5.48139e-05	0.000526779	37	4	54630659	R								TRUE			NA
cg00082770	-2.70959	2.3523e-17	2.41145e-15	37	2	200332739	R	FLJ32063	NR_026830	TSS200	chr2:200333687-200334172	N_Shore			NA			NA
cg00082787	2.42591	4.61779e-17	4.4519e-15	37	22	29424662	R	ZNRF3	NM_032173	Body	chr22:29426510-29426843	N_Shore			NA			NA
cg00083042	2.20999	5.15275e-09	1.14177e-07	37	10	30404617	R								NA			NA
cg00083262	0.898901	2.83823e-07	4.48829e-06	37	1	157125526	R								TRUE	1:157125461-157126139	Unclassified	NA
cg00083659	0.795803	0.000786067	0.00553847	37	22	37404577	F	C22orf33;C22orf33	NM_178552;NM_001163857	TSS1500;TSS1500					NA			NA
cg00084094	0.630686	0.000334991	0.00262435	37	12	109096204	R	CORO1C	NM_014325	5'UTR					TRUE			NA
cg00084184	2.8158	2.51051e-23	8.8429e-21	37	4	10019009	R	SLC2A9;SLC2A9	NM_020041;NM_001001290	Body;Body	chr4:10020481-10021026	N_Shore			NA			NA
cg00084398	0.895015	9.6033e-12	3.48764e-10	37	6	43249983	R	TTBK1	NM_032538	Body	chr6:43251671-43252018	N_Shore			NA			NA
cg00084435	0.477284	0.000178668	0.00150528	37	5	195276	R	LRRC14B	NM_001080478	Body	chr5:195087-195323	Island			NA			NA
cg00084577	1.1331	2.34199e-14	1.36186e-12	37	16	30721139	R	SNORA30;SRCAP	NR_002966;NM_006662	TSS1500;Body					NA			NA
cg00084643	-1.47337	5.74911e-09	1.26205e-07	37	5	125936116	F	PHAX	NM_032177	TSS1500	chr5:125936522-125937100	N_Shore			NA	5:125936047-125937986	Promoter_Associated	NA
cg00085013	-2.3438	6.07425e-15	3.91575e-13	37	3	14871570	F	FGD5	NM_152536	Body					TRUE			NA
cg00085123	0.891256	1.43684e-06	1.97091e-05	37	2	8723906	F				chr2:8723855-8724093	Island			TRUE	2:8723689-8724336	Unclassified	TRUE
cg00085370	-0.729288	2.96105e-06	3.80444e-05	37	5	1855960	F				chr5:1856773-1858444	N_Shore			NA			NA
cg00085416	1.59706	3.15608e-11	1.04351e-09	37	8	74660265	R	STAU2;STAU2;STAU2;STAU2;STAU2;STAU2;STAU2	NM_001164381;NM_001164380;NM_001164385;NM_001164382;NM_001164384;NM_014393;NM_001164383	TSS1500;TSS1500;TSS1500;TSS1500;TSS1500;TSS1500;TSS1500	chr8:74658490-74659828	S_Shore			NA			NA
cg00085434	1.37243	3.87485e-05	0.000386825	37	11	14927489	R				chr11:14926471-14927770	Island		RDMR	NA	11:14925932-14927586	Promoter_Associated	NA
cg00085438	2.0231	1.23385e-21	3.08694e-19	37	3	152049980	F	MBNL1;MBNL1;MBNL1;MBNL1;MBNL1;MBNL1;MBNL1	NM_207295;NM_207293;NM_021038;NM_207292;NM_207296;NM_207297;NM_207294	Body;Body;Body;Body;Body;Body;Body					TRUE			NA
cg00085448	1.24588	3.50145e-07	5.44067e-06	37	12	113416442	F	OAS2;OAS2;OAS2	NM_001032731;NM_002535;NM_016817	1stExon;1stExon;1stExon					TRUE	12:113415627-113416688	Promoter_Associated	TRUE
cg00085486	1.27352	3.1711e-05	0.000323054	37	7	84812539	R				chr7:84814839-84816242	N_Shelf			NA			NA
cg00085493	-0.784726	0.000415378	0.00317203	37	1	208040203	R				chr1:208041862-208042718	N_Shore			NA	1:208040112-208040408	Promoter_Associated_Cell_type_specific	NA
cg00086426	-0.821454	0.000318012	0.00250646	37	16	10934373	R								NA			NA
cg00087368	-2.59438	4.40329e-11	1.41816e-09	37	6	100896392	R	SIM1	NM_005068	Body	chr6:100897080-100897621	N_Shore			TRUE			NA
cg00087511	0.425479	0.00129732	0.00856144	37	1	9069875	R	SLC2A7	NM_207420	Body					NA			NA
cg00087601	-1.01865	2.91073e-09	6.74322e-08	37	21	35747094	R	FAM165B	NM_058182	TSS1500	chr21:35747326-35748122	N_Shore			NA	21:35746945-35748597	Promoter_Associated	NA
cg00087645	0.555859	4.04317e-07	6.19905e-06	37	6	157040279	F				chr6:157040983-157041385	N_Shore			NA			NA
cg00087884	-0.706131	8.42833e-06	9.81021e-05	37	1	6525551	R	TNFRSF25;TNFRSF25;TNFRSF25;TNFRSF25;TNFRSF25;TNFRSF25	NM_148967;NM_003790;NM_148970;NM_001039664;NM_148966;NM_148965	Body;Body;Body;Body;Body;Body	chr1:6525996-6526228	N_Shore			TRUE			TRUE
cg00087963	-1.33381	3.04196e-09	7.02764e-08	37	16	51169437	R				chr16:51168266-51169110	S_Shore		RDMR	TRUE			NA
cg00088428	-0.281216	0.00062065	0.00450651	37	6	112668522	R	RFPL4B	NM_001013734	TSS200					NA			NA
cg00088844	-0.711196	1.55815e-08	3.15159e-07	37	12	52317349	R							RDMR	TRUE	12:52317074-52317565	Unclassified	TRUE
cg00088885	-0.773809	7.9861e-06	9.34563e-05	37	4	88896634	R	SPP1;SPP1;SPP1	NM_000582;NM_001040058;NM_001040060	TSS200;TSS200;TSS200					NA			NA
cg00089451	0.638388	0.000180535	0.001519	37	2	233468457	R				chr2:233470646-233471077	N_Shelf			NA			NA
cg00089823	-1.15024	3.89122e-05	0.000388212	37	5	1932098	R				chr5:1930754-1931986	S_Shore			NA			TRUE
cg00089966	3.26986	1.95502e-22	5.78566e-20	37	5	159340430	R				chr5:159343215-159343574	N_Shelf			TRUE			TRUE
cg00090431	1.42414	1.18775e-12	5.06978e-11	37	2	241853101	R				chr2:241855374-241855631	N_Shelf			NA	2:241853053-241853260	Unclassified	NA
cg00090674	1.45642	1.90916e-05	0.000204649	37	22	50446678	F	IL17REL	NM_001001694	5'UTR	chr22:50448567-50449521	N_Shore			NA			NA
cg00090737	-0.670766	0.000180021	0.00151511	37	10	135000089	F	KNDC1	NM_152643	Body	chr10:134999520-134999831	S_Shore			NA			TRUE
cg00091302	0.919459	2.16087e-05	0.000228957	37	1	182602986	F								TRUE	1:182602876-182602990	Unclassified_Cell_type_specific	NA
cg00091569	0.918035	3.43618e-10	9.44583e-09	37	3	40428383	R	ENTPD3	NM_001248	TSS1500	chr3:40428651-40429015	N_Shore			TRUE			NA
cg00091633	2.53351	5.28925e-15	3.44731e-13	37	3	120170383	R	FSTL1	NM_007085	TSS1500	chr3:120169202-120170519	Island			NA			TRUE
cg00091693	3.0509	3.49941e-16	2.85987e-14	37	17	39041602	R	KRT20	NM_019010	TSS200					NA	17:39041110-39041866	Unclassified_Cell_type_specific	NA
cg00092518	3.36197	6.23866e-15	4.01412e-13	37	13	50070550	F	PHF11;PHF11;PHF11	NM_001040443;NM_001040444;NM_001040444	Body;1stExon;5'UTR	chr13:50070022-50070719	Island			NA	13:50069863-50070977	Promoter_Associated	NA
cg00092992	0.716825	4.00885e-05	0.000398611	37	1	33596100	F				chr1:33592891-33593155	S_Shelf			NA	1:33595916-33596127	Unclassified_Cell_type_specific	NA
cg00093080	-0.459138	2.62553e-05	0.000272866	37	12	117421224	F	FBXW8;FBXW8	NM_153348;NM_012174	Body;Body					TRUE			NA
cg00093149	0.757836	0.000140323	0.00121693	37	12	12337461	F	LRP6	NM_002336	Body					TRUE			NA
cg00093433	1.00001	2.75271e-05	0.000284737	37	16	85981310	R				chr16:85981652-85981965	N_Shore		DMR	NA	16:85980941-85982051	Promoter_Associated	NA
cg00094913	0.710865	8.62306e-05	0.000790202	37	3	194120949	R	GP5	NM_004488	TSS1500	chr3:194117601-194118988	S_Shore			NA			NA
cg00094943	-1.93349	3.66256e-15	2.46145e-13	37	7	150093059	F	ZNF775	NM_173680	Body	chr7:150093636-150095229	N_Shore			NA			NA
cg00095018	1.03063	8.21967e-12	3.02583e-10	37	6	36101338	F	MAPK13	NM_002754	Body	chr6:36098039-36098621	S_Shelf			NA	6:36101310-36101392	Unclassified	NA
cg00095259	-0.754802	1.90475e-05	0.000204268	37	18	59218797	F	CDH20	NM_031891	Body	chr18:59221451-59221986	N_Shelf			NA	18:59218734-59219071	Unclassified	NA
cg00095326	1.40301	1.57059e-06	2.13648e-05	37	1	228940949	R								TRUE	1:228940774-228941014	Unclassified_Cell_type_specific	NA
cg00095333	1.83874	1.35711e-15	9.89512e-14	37	17	70172535	F								TRUE			NA
cg00095431	-1.47122	2.17565e-06	2.87644e-05	37	2	67775781	F								TRUE			NA
cg00095523	-1.60491	5.3823e-11	1.70599e-09	37	12	115105485	R				chr12:115104848-115105548	Island		RDMR	NA	12:115105026-115106667	Unclassified_Cell_type_specific	NA
cg00095728	0.625959	0.000674208	0.00484339	37	2	176976081	R				chr2:176977284-176977540	N_Shore			NA	2:176975825-176977222	Unclassified	TRUE
cg00095930	0.677498	0.000289756	0.00230753	37	12	109569116	F						low-CpG:108053416-108053607		TRUE			TRUE
cg00096106	1.58358	0.000319051	0.00251377	37	5	100176809	F	ST8SIA4	NM_005668	Body					TRUE			NA
cg00096328	0.747787	4.64675e-07	7.03584e-06	37	3	41200046	R								TRUE			NA
cg00096536	-0.800058	0.000165432	0.00140632	37	4	154711906	R				chr4:154712073-154712706	N_Shore		RDMR	NA			NA
cg00096603	2.17065	1.20508e-10	3.5979e-09	37	4	95572122	R	PDLIM5;PDLIM5;PDLIM5	NR_024179;NM_006457;NM_001011513	Body;Body;Body					TRUE			NA
cg00096742	-2.34175	2.53579e-22	7.29786e-20	37	14	101318357	R	MIR770;MEG3;MEG3;MEG3	NR_030528;NR_003531;NR_003530;NR_002766	TSS1500;Body;Body;Body					NA	14:101317248-101319039	Unclassified	NA
cg00097450	0.548944	0.00064345	0.00465053	37	17	78473077	R								TRUE			NA
cg00097619	0.578937	0.000291902	0.00232221	37	3	49942096	F	MST1R	NM_002447	TSS1500	chr3:49940099-49940431	S_Shore			NA			NA
cg00099094	-1.18852	6.85856e-06	8.14676e-05	37	5	2334514	R								NA			NA
cg00099393	1.43974	3.67148e-09	8.35096e-08	37	7	157361621	R	PTPRN2;PTPRN2;PTPRN2	NM_002847;NM_130842;NM_130843	Body;Body;Body	chr7:157361512-157361805	Island			NA	7:157360891-157362762	Unclassified_Cell_type_specific	TRUE
cg00100804	0.912603	0.000148187	0.00127678	37	9	123836087	F				chr9:123836702-123837585	N_Shore			NA			NA
cg00100948	1.00701	7.17054e-07	1.04599e-05	37	3	186382460	R	HRG	NM_000412	TSS1500					TRUE			NA
cg00101602	1.15646	3.08589e-05	0.000315271	37	10	73857843	R	ASCC1	NM_015947	Body					TRUE			TRUE
cg00101712	2.23982	7.35239e-12	2.72849e-10	37	3	123699208	F	ROPN1	NM_017578	Body					NA	3:123697901-123699646	Unclassified	NA
cg00101713	1.89081	6.81915e-11	2.12703e-09	37	15	32984867	F	SCG5;SCG5	NM_003020;NM_001144757	Body;Body					NA			NA
cg00101940	-0.92398	1.43704e-05	0.000158824	37	16	85479301	R								TRUE			TRUE
cg00102093	2.75525	1.70893e-21	4.14826e-19	37	1	232345923	R								TRUE			NA
cg00102439	-1.6239	1.28908e-10	3.831e-09	37	8	1441403	F				chr8:1441370-1441581	Island			NA			NA
cg00102731	1.36832	0.000216418	0.00178256	37	20	2729245	R	EBF4	NM_001110514	Body	chr20:2729997-2730797	N_Shore			TRUE			NA
cg00102955	2.55787	4.26796e-16	3.43593e-14	37	1	150230345	F	CA14;CA14	NM_012113;NM_012113	1stExon;5'UTR					NA			NA
cg00103299	-1.49885	6.77782e-07	9.93716e-06	37	15	93362247	R							CDMR	TRUE			NA
cg00103448	1.24019	3.51185e-06	4.44215e-05	37	17	46600533	F				chr17:46604362-46604881	N_Shelf			TRUE	17:46600310-46600829	Unclassified_Cell_type_specific	NA
cg00104608	-1.45169	2.32856e-09	5.49058e-08	37	3	76146501	R								TRUE			NA
cg00105753	0.680403	9.38523e-05	0.000852299	37	17	30437854	F								NA	17:30437710-30438959	Unclassified_Cell_type_specific	NA
cg00107046	-0.763572	0.000168208	0.0014267	37	1	16465562	R	EPHA2	NM_004431	Body	chr1:16464376-16464621	S_Shore			TRUE	1:16464942-16465584	Unclassified	TRUE
cg00107488	1.03556	4.36691e-05	0.000430291	37	22	19930437	R	COMT;TXNRD2	NM_000754;NM_006440	5'UTR;TSS1500	chr22:19929096-19929468	S_Shore			TRUE			NA
cg00107630	-1.62889	1.44418e-13	7.26195e-12	37	9	120174408	R	ASTN2;ASTN2;ASTN2	NM_198186;NM_014010;NM_198187	Body;Body;Body	chr9:120175253-120177496	N_Shore			NA			NA
cg00107890	-0.514903	7.05614e-05	0.000660179	37	15	71492746	F	THSD4	NM_024817	Body					TRUE			NA
cg00107970	-1.33055	2.06878e-06	2.74726e-05	37	1	156119457	R								NA	1:156119143-156119849	Unclassified_Cell_type_specific	NA
cg00108715	0.865494	1.46184e-07	2.45025e-06	37	3	52565015	F	NT5DC2;NT5DC2	NM_001134231;NM_022908	Body;Body	chr3:52567009-52568807	N_Shore			NA	3:52564840-52565242	Unclassified_Cell_type_specific	NA
cg00108894	-1.30193	3.68838e-13	1.72572e-11	37	7	138985930	F	UBN2	NM_173569	3'UTR					NA			NA
cg00109069	0.560913	0.00101504	0.00692131	37	16	85433452	R								NA			NA
cg00109344	1.31817	3.2352e-07	5.06091e-06	37	9	116344532	R	RGS3;RGS3;RGS3;RGS3	NM_130795;NM_021106;NM_144488;NM_134427	Body;5'UTR;Body;5'UTR	chr9:116346400-116346603	N_Shore			NA	9:116343993-116345494	Promoter_Associated	NA
cg00110039	1.36833	6.05052e-10	1.588e-08	37	22	17638932	R	CECR4;CECR5;CECR5;CECR4	NR_024483;NM_017829;NM_033070;NR_024482	TSS1500;Body;Body;TSS1500	chr22:17639481-17640714	N_Shore			NA			NA
cg00110832	1.7421	1.5349e-13	7.67456e-12	37	6	32121130	R	PPT2;PPT2;PRRT1	NM_138717;NM_005155;NM_030651	TSS200;TSS1500;TSS1500	chr6:32121829-32122529	N_Shore			TRUE	6:32120376-32123743	Promoter_Associated	NA
cg00110846	-1.28149	1.9172e-12	7.88942e-11	37	7	77669243	R	MAGI2	NM_012301	Body	chr7:77669670-77670057	N_Shore			NA			NA
cg00111826	0.829456	0.00131049	0.00863545	37	5	7983865	R								NA			NA
cg00112238	0.75939	0.000850511	0.00593166	37	1	54719938	R	SSBP3;SSBP3;SSBP3	NM_001009955;NM_018070;NM_145716	Body;Body;Body	chr1:54723696-54724019	N_Shelf			TRUE	1:54719930-54720210	Unclassified_Cell_type_specific	TRUE
cg00112588	0.679861	4.4488e-06	5.50186e-05	37	1	178061945	R	LOC100302401;RASAL2	NR_027982;NM_170692	Body;TSS1500	chr1:178062712-178063846	N_Shore			NA			NA
cg00112798	0.857565	0.000556628	0.00409664	37	16	87619963	R								NA			NA
cg00113096	2.46576	6.1575e-18	7.07737e-16	37	2	134119805	F	NCKAP5;NCKAP5	NM_207363;NM_207481	Body;Body					TRUE			NA
cg00114012	2.6756	1.98827e-20	3.84824e-18	37	9	130158144	F	SLC2A8	NM_014580	TSS1500	chr9:130158774-130159057	N_Shore			NA	9:130158093-130158507	Unclassified	NA
cg00115149	4.63774	1.60317e-21	3.91719e-19	37	10	111735487	R								TRUE			NA
cg00115178	1.43378	4.70862e-05	0.000460224	37	10	12648176	R	CAMK1D;CAMK1D	NM_020397;NM_153498	Body;Body					TRUE	10:12647615-12648843	Promoter_Associated	TRUE
cg00115458	3.41768	3.24803e-11	1.07174e-09	37	6	33141305	R	COL11A2;COL11A2;COL11A2	NM_080679;NM_080681;NM_080680	Body;Body;Body					NA			NA
cg00115654	0.656854	0.000172434	0.0014584	37	9	136294920	R	ADAMTS13;ADAMTS13;ADAMTS13;ADAMTS13	NR_024514;NM_139027;NM_139025;NM_139026	Body;Body;Body;Body	chr9:136294738-136295236	Island			NA	9:136294653-136295202	Unclassified	NA
cg00116315	1.04688	1.28313e-05	0.000143419	37	6	35466268	F	TULP1;TEAD3	NM_003322;NM_003214	Body;TSS1500	chr6:35464056-35466269	Island			NA			NA
cg00118507	-0.725381	5.97551e-05	0.000569301	37	1	113215934	F	MOV10;MOV10	NM_001130079;NM_020963	TSS1500;TSS1500	chr1:113217475-113218097	N_Shore			TRUE			NA
cg00118783	-1.6432	3.67801e-06	4.63334e-05	37	16	1069760	F				chr16:1069294-1070214	Island			NA			TRUE
cg00118978	1.14249	4.98611e-07	7.50481e-06	37	3	14597418	F				chr3:14597400-14597651	Island			TRUE			NA
cg00119314	0.644561	0.000140995	0.00122194	37	17	48555610	F	RSAD1	NM_018346	TSS1500	chr17:48556004-48556509	N_Shore			NA	17:48555358-48557279	Promoter_Associated	NA
cg00119896	0.464906	0.000101807	0.000916492	37	7	3083721	F	CARD11	NM_032415	TSS200					TRUE	7:3082470-3084096	Promoter_Associated	TRUE
cg00120274	-0.769897	0.000421211	0.00321152	37	10	44786545	R				chr10:44788811-44789120	N_Shelf			NA	10:44786408-44786551	Unclassified_Cell_type_specific	NA
cg00120464	-0.229828	5.06304e-05	0.000490616	37	4	146842191	F	ZNF827	NM_178835	Body					TRUE			NA
cg00120810	1.48285	1.13377e-14	6.96841e-13	37	3	11195317	R	HRH1;HRH1	NM_001098213;NM_001098212	5'UTR;TSS1500	chr3:11195901-11196552	N_Shore			NA			NA
cg00120932	1.59912	0.000314485	0.00248183	37	6	30079436	R	TRIM31	NM_007028	Body					NA			NA
cg00121884	1.92098	1.26221e-25	7.31155e-23	37	20	3799732	R	C20orf29	NM_018347	TSS1500	chr20:3800761-3801546	N_Shore			NA			NA
cg00122347	0.777793	7.78709e-05	0.00072091	37	10	104236741	F	TMEM180	NM_024789	3'UTR					NA	10:104236693-104236848	Unclassified_Cell_type_specific	NA
cg00122854	0.564524	0.000132483	0.00115643	37	2	218898491	R				chr2:218898490-218898835	Island			NA			NA
cg00122944	1.16825	6.88579e-06	8.1753e-05	37	10	6227266	R	PFKFB3	NM_001145443	Body					TRUE			NA
cg00123478	1.55981	9.12947e-09	1.93465e-07	37	4	10458165	F	ZNF518B	NM_053042	5'UTR	chr4:10458129-10459353	Island			NA			NA
cg00123906	0.677433	9.86409e-10	2.48893e-08	37	8	143818127	R	C8orf55	NM_016647	3'UTR	chr8:143820468-143821310	N_Shelf			NA			NA
cg00124009	1.29116	5.14458e-12	1.96643e-10	37	1	201439578	F	PHLDA3	NM_012396	TSS1500	chr1:201437519-201438648	S_Shore			NA			NA
cg00125002	0.564067	0.00140194	0.00916181	37	3	129747708	F								NA			NA
cg00126148	-1.93607	1.8487e-07	3.03603e-06	37	4	111533517	F				chr4:111532647-111533391	S_Shore			NA			NA
cg00126638	2.09598	4.60451e-05	0.000451083	37	6	29795583	R	HLA-G	NM_002127	5'UTR	chr6:29795553-29796594	Island			NA			TRUE
cg00126889	-1.23275	3.51201e-09	8.01328e-08	37	8	42103037	F								TRUE			NA
cg00127198	1.26578	2.273e-10	6.43707e-09	37	7	555518	F	PDGFA;PDGFA	NM_002607;NM_033023	Body;Body	chr7:556611-562845	N_Shore			NA			NA
cg00127353	1.39815	1.39881e-08	2.85463e-07	37	6	112210969	F								TRUE			NA
cg00127487	0.584471	0.000121322	0.0010696	37	22	29600139	R				chr22:29601547-29602291	N_Shore			NA			NA
cg00127861	-0.62935	2.71684e-05	0.000281331	37	16	86951112	R								NA			NA
cg00129563	1.14549	1.04192e-06	1.47279e-05	37	5	122434853	F	PRDM6	NM_001136239	Body	chr5:122433878-122435551	Island		RDMR	TRUE			TRUE
cg00129651	3.42453	3.28518e-16	2.70068e-14	37	17	38347710	F	RAPGEFL1	NM_016339	Body	chr17:38347533-38347765	Island			TRUE	17:38346579-38348542	Unclassified	NA
cg00129785	1.15069	1.82462e-06	2.45024e-05	37	21	47455453	F				chr21:47456271-47456530	N_Shore			NA			NA
cg00130181	-0.911956	4.84059e-06	5.93789e-05	37	13	100517033	F	CLYBL	NM_206808	Body					TRUE			NA
cg00130530	1.01041	3.08708e-10	8.54319e-09	37	6	35657202	R	FKBP5;FKBP5;FKBP5;FKBP5	NM_001145775;NM_001145777;NM_001145776;NM_004117	5'UTR;TSS1500;TSS1500;TSS1500	chr6:35655607-35656856	S_Shore			NA	6:35655414-35657286	Promoter_Associated	NA
cg00130693	-0.586196	0.000881253	0.00611636	37	1	226110727	F	PYCR2	NM_013328	Body	chr1:226111642-226112552	N_Shore			NA			NA
cg00130808	1.57942	0.00059346	0.00433215	37	15	37178909	R	LOC145845	NR_024264	TSS200	chr15:37179516-37179782	N_Shore		RDMR	NA			NA
cg00130819	-1.12518	2.58626e-07	4.12245e-06	37	16	84828829	R								TRUE			NA
cg00130947	-0.706753	0.000271701	0.00217897	37	6	129677367	R	LAMA2;LAMA2	NM_001079823;NM_000426	Body;Body					TRUE			NA
cg00131261	1.83411	4.25303e-08	7.92834e-07	37	8	142287264	F								NA			NA
cg00131423	-1.7872	1.2448e-13	6.3304e-12	37	16	85498042	R								NA			NA
cg00131758	0.596958	0.000452312	0.00341741	37	22	18275234	F	MICAL3	NM_015241	Body	chr22:18275679-18275922	N_Shore			NA			NA
cg00133204	0.75323	1.08048e-07	1.85776e-06	37	13	98625733	R	IPO5	NM_002271	Body	chr13:98628059-98629306	N_Shelf			NA	13:98625687-98625759	Unclassified_Cell_type_specific	NA
cg00133624	1.58969	3.38384e-12	1.33315e-10	37	12	3756130	F	EFCAB4B;EFCAB4B	NM_001144958;NM_001144959	Body;Body					TRUE			NA
cg00133811	-1.20846	1.03934e-05	0.000118532	37	2	149793702	R	KIF5C	NM_004522	Body					NA			NA
cg00134210	2.72148	7.64758e-14	4.04031e-12	37	10	14644132	R	FAM107B	NM_031453	Body	chr10:14645752-14646705	N_Shore		DMR	NA	10:14643993-14644967	Promoter_Associated	TRUE
cg00134415	-0.551858	0.000214886	0.00177129	37	22	38856689	R				chr22:38857573-38857860	N_Shore			NA			NA
cg00135293	1.09655	0.000203291	0.00168676	37	6	102088363	R	GRIK2;GRIK2;GRIK2	NM_001166247;NM_175768;NM_021956	Body;Body;Body					TRUE			NA
cg00135416	-0.580915	0.000602321	0.00438906	37	17	78172177	R	CARD14;CARD14	NM_052819;NM_024110	Body;Body	chr17:78172176-78172402	Island			NA			NA
cg00135497	-4.16446	1.05554e-17	1.1615e-15	37	4	155661849	R				chr4:155661678-155661984	Island		RDMR	NA			NA
cg00135870	0.83997	1.33164e-07	2.25051e-06	37	16	22203854	R				chr16:22201388-22202791	S_Shore		RDMR	NA	16:22203489-22203927	Promoter_Associated	NA
cg00135888	1.15349	6.33787e-06	7.5855e-05	37	11	57407543	F	MIR130A	NR_029673	TSS1500					NA			NA
cg00136077	0.629892	0.000488079	0.00364998	37	12	132832440	F	GALNT9	NM_001122636	Body	chr12:132834178-132834430	N_Shore			NA			NA
cg00136173	-0.754267	3.7918e-05	0.000379444	37	5	176045746	R				chr5:176046143-176047641	N_Shore			NA			NA
cg00136192	-0.498631	0.000648303	0.0046803	37	19	5978423	F	RANBP3;RANBP3;RANBP3	NM_003624;NM_007322;NM_007320	TSS200;TSS200;TSS200	chr19:5977440-5978816	Island			NA	19:5977508-5978708	Promoter_Associated	NA
cg00136547	-2.38797	8.96197e-19	1.2142e-16	37	6	56507796	R	DST;DST;DST;DST;DST;DST;DST	NM_001144770;NM_020388;NM_183380;NM_015548;NM_001723;NM_001144771;NM_001144769	Body;TSS200;Body;TSS200;TSS200;Body;Body					TRUE			NA
cg00136968	-0.717252	0.000367534	0.00284838	37	7	4050043	R	SDK1	NM_152744	Body					NA			NA
cg00137016	-1.12746	1.32633e-06	1.83145e-05	37	19	52675231	F	ZNF836	NM_001102657	TSS1500	chr19:52674327-52674855	S_Shore			NA	19:52674229-52675399	Unclassified	NA
cg00137385	-3.98122	4.96057e-28	5.30956e-25	37	18	46288005	F	KIAA0427;KIAA0427	NM_001142397;NM_014772	Body;Body	chr18:46287906-46288140	Island			NA			NA
cg00138126	0.636571	0.000515168	0.00382855	37	20	56286697	F	PMEPA1;PMEPA1;PMEPA1	NM_199169;NM_199170;NM_199171	TSS1500;TSS1500;TSS200	chr20:56283891-56285395	S_Shore			NA			NA
cg00138777	0.491336	5.41956e-05	0.000521415	37	10	52434552	R				chr10:52434646-52434866	N_Shore			NA			NA
cg00139681	2.08795	1.40468e-11	4.95272e-10	37	7	106125168	R								TRUE			NA
cg00140361	0.701111	0.000110475	0.000985545	37	6	31700617	R	CLIC1	NM_001288	Body	chr6:31695894-31698245	S_Shelf			NA			NA
cg00141295	0.515825	0.000314079	0.00247905	37	7	56182960	R	LOC389493	NM_001145712	3'UTR	chr7:56183577-56184165	N_Shore			NA			NA
cg00141688	0.476483	2.67637e-05	0.000277634	37	2	10517352	R	HPCAL1;HPCAL1	NM_002149;NM_134421	5'UTR;5'UTR					NA	2:10517173-10517498	Unclassified_Cell_type_specific	NA
cg00142155	0.550552	0.000671886	0.00482884	37	17	42639118	F				chr17:42634829-42636851	S_Shelf		RDMR	TRUE	17:42639099-42639125	Unclassified_Cell_type_specific	NA
cg00142239	-0.997402	7.04353e-05	0.000659211	37	8	1508017	F	DLGAP2	NM_004745	Body	chr8:1509850-1511735	N_Shore		RDMR	NA			NA
cg00142482	-0.994967	0.000200324	0.00166506	37	10	50396833	F	C10orf128	NM_001010863	TSS1500					NA			NA
cg00143249	1.9291	5.56171e-14	3.01327e-12	37	7	156798810	R	MNX1;MNX1	NM_001165255;NM_005515	Body;Body	chr7:156795355-156799394	Island			NA			TRUE
cg00143376	0.784002	8.67473e-09	1.84442e-07	37	2	232394702	R	NMUR1	NM_006056	Body	chr2:232394763-232395337	N_Shore			NA			NA
cg00143809	3.75468	3.43937e-13	1.61812e-11	37	22	50720552	F	PLXNB2	NM_012401	Body	chr22:50718979-50721884	Island		DMR	NA			NA
cg00145150	1.29891	0.000411892	0.00314836	37	19	46713976	R	DKFZp434J0226	NR_027003	Body					NA			NA
cg00145596	0.950017	2.39915e-07	3.84935e-06	37	16	81813706	F	PLCG2	NM_002661	5'UTR	chr16:81812710-81813707	Island			NA	16:81813649-81813731	Promoter_Associated	NA
cg00145683	-1.23382	1.99502e-05	0.000212984	37	16	51915089	F								TRUE			NA
cg00146676	0.955724	4.43748e-07	6.74804e-06	37	4	113442804	F				chr4:113444181-113444389	N_Shore			TRUE			NA
cg00146755	1.03529	3.20828e-09	7.37763e-08	37	21	45551519	F				chr21:45553021-45554037	N_Shore			NA	21:45551385-45551693	Gene_Associated	NA
cg00146805	0.907215	0.000135865	0.00118233	37	7	52339555	R				chr7:52341468-52342266	N_Shore			NA			NA
cg00146864	1.93331	1.24529e-17	1.35026e-15	37	17	43392332	R	MAP3K14	NM_003954	5'UTR	chr17:43393891-43394938	N_Shore		CDMR	NA			NA
cg00147286	2.49397	1.20024e-07	2.0453e-06	37	16	70713933	R	MTSS1L	NM_138383	Body	chr16:70713461-70714379	Island			TRUE	16:70713932-70714145	Gene_Associated_Cell_type_specific	TRUE
cg00147509	-0.89966	0.000272487	0.00218442	37	22	48917166	F	FAM19A5	NM_001082967	Body				CDMR	NA			NA
cg00147788	-0.928439	0.000289234	0.00230368	37	6	125855365	R								TRUE			NA
cg00147849	1.86871	9.99535e-25	4.75629e-22	37	7	127906889	R				chr7:127910860-127911287	N_Shelf			TRUE			TRUE
cg00147943	1.00485	1.80356e-05	0.000194582	37	1	68225713	F	GNG12	NM_018841	5'UTR					TRUE	1:68225421-68226660	Unclassified	NA
cg00148223	-0.757952	0.000575639	0.00421829	37	5	957913	F				chr5:958785-959172	N_Shore			TRUE			NA
cg00149537	-1.56352	4.36168e-06	5.40527e-05	37	1	9409810	R	SPSB1	NM_025106	5'UTR					NA			NA
cg00149684	-2.41365	8.03316e-16	6.11071e-14	37	1	155097375	F				chr1:155098434-155100451	N_Shore			NA			TRUE
cg00149708	1.19381	5.47193e-08	9.97173e-07	37	19	56047884	F	SBK2	NM_001101401	TSS1500	chr19:56047403-56047668	S_Shore			NA			NA
cg00149734	-0.771713	1.68061e-08	3.37666e-07	37	10	131454304	R	MGMT	NM_002412	Body					TRUE			NA
cg00151048	-1.07428	1.41873e-05	0.000157044	37	1	102098127	R								TRUE			NA
cg00151370	0.962952	0.000167872	0.00142433	37	6	16323285	F	ATXN1;ATXN1	NM_001128164;NM_000332	Body;Body	chr6:16326950-16327781	N_Shelf			TRUE	6:16322809-16323523	Unclassified	TRUE
cg00151728	2.18428	1.18612e-09	2.9514e-08	37	3	169478456	F				chr3:169482338-169483052	N_Shelf			NA			NA
cg00152034	-1.19893	8.88787e-06	0.000102893	37	5	52094702	F	ITGA1;PELO	NM_181501;NM_015946	Body;5'UTR	chr5:52095811-52096025	N_Shore			NA			NA
cg00152126	-1.93197	9.27202e-15	5.7816e-13	37	10	126744846	F	CTBP2;CTBP2	NM_001083914;NM_001329	5'UTR;5'UTR					TRUE			NA
cg00152259	0.696333	1.14577e-09	2.86007e-08	37	17	34957477	F	MRM1	NM_024864	TSS1500	chr17:34957833-34958790	N_Shore			NA	17:34957379-34960313	Promoter_Associated	NA
cg00152708	0.715318	1.8518e-05	0.00019917	37	1	1104316	R	MIR429	NR_029957	TSS200	chr1:1098043-1100584	S_Shelf			NA	1:1104082-1104371	Unclassified_Cell_type_specific	NA
cg00152878	5.50307	1.03325e-26	8.03662e-24	37	1	3209519	R	PRDM16;PRDM16	NM_022114;NM_199454	Body;Body					NA			NA
cg00152942	-1.14304	2.57457e-08	4.99225e-07	37	16	57125755	F	CPNE2	NM_152727	TSS1500	chr16:57126044-57127110	N_Shore			NA			NA
cg00152948	-0.44069	0.000466883	0.00351337	37	21	43197205	R				chr21:43198413-43198715	N_Shore			NA			NA
cg00153101	-0.786026	0.00154582	0.0099616	37	1	2431753	F	PLCH2	NM_014638	Body	chr1:2433648-2434065	N_Shore			NA	1:2430682-2432114	Unclassified_Cell_type_specific	NA
cg00153395	0.727989	2.37825e-05	0.00024963	37	1	65327523	F	JAK1	NM_002227	Body					TRUE	1:65327163-65327812	Unclassified_Cell_type_specific	NA
cg00153448	0.96676	5.67155e-07	8.44117e-06	37	20	1788248	F				chr20:1783824-1784552	S_Shelf			NA			NA
cg00154554	-1.6985	2.11655e-18	2.67972e-16	37	1	8729713	F	RERE;RERE	NM_012102;NM_001042681	5'UTR;5'UTR					TRUE			NA
cg00154846	-1.40649	1.80933e-07	2.97785e-06	37	1	2130580	F	C1orf86	NM_001146310	Body	chr1:2126048-2126642	S_Shelf			NA	1:2130416-2132750	Unclassified	NA
cg00154957	0.794495	7.09623e-05	0.000663413	37	1	109850562	F	MYBPHL	NM_001010985	TSS1500					NA			NA
cg00155063	3.00243	7.28874e-16	5.59454e-14	37	1	12227825	R	TNFRSF1B	NM_001066	Body	chr1:12226876-12227712	S_Shore		DMR	TRUE	1:12226628-12228209	Promoter_Associated	TRUE
cg00155423	-1.69267	1.22126e-06	1.70097e-05	37	2	219758021	R	WNT10A	NM_025216	3'UTR	chr2:219757458-219758001	S_Shore			TRUE	2:219757399-219758059	Unclassified	TRUE
cg00155619	0.75132	0.000282871	0.00225812	37	6	33173278	R	HSD17B8	NM_014234	Body	chr6:33172289-33172823	S_Shore			NA	6:33171945-33173651	Promoter_Associated	TRUE
cg00156194	1.84009	4.7408e-19	6.77881e-17	37	11	63330918	R	HRASLS2	NM_017878	TSS200					NA			NA
cg00156336	0.600806	5.68853e-06	6.87635e-05	37	2	75788423	F	FAM176A;FAM176A	NM_032181;NM_001135032	5'UTR;TSS1500	chr2:75787129-75787420	S_Shore			NA			TRUE
cg00156995	0.636907	0.000410601	0.00313955	37	13	41055588	F	LOC646982;LOC646982;LOC646982	NR_024505;NR_024507;NR_024506	TSS1500;TSS1500;TSS1500					NA			NA
cg00157012	0.828141	0.000109931	0.000981347	37	8	25059252	F	DOCK5	NM_024940	Body				DMR	NA			NA
cg00157109	0.577795	1.61076e-06	2.18653e-05	37	7	151569191	R	PRKAG2	NM_016203	Body	chr7:151572761-151575106	N_Shelf			NA			NA
cg00157477	1.67853	1.58714e-08	3.2048e-07	37	6	29855473	F	HLA-H	NR_001434	Body	chr6:29855295-29856565	Island	high-CpG:29963444-29963490		NA			NA
cg00157638	0.493351	0.00040766	0.00311939	37	1	10963932	R								NA	1:10963594-10964190	Unclassified_Cell_type_specific	NA
cg00157962	1.92057	1.51397e-15	1.09217e-13	37	1	109102212	F	FAM102B	NM_001010883	TSS1500	chr1:109102538-109103212	N_Shore			NA			NA
cg00158654	2.44272	1.3472e-13	6.81543e-12	37	1	192285333	F	RGS21	NM_001039152	TSS1500					NA			NA
cg00158770	0.842317	3.35855e-06	4.26583e-05	37	8	19271585	R	CSGALNACT1;CSGALNACT1;CSGALNACT1	NM_018371;NM_001130518;NR_024040	Body;Body;Body					TRUE			NA
cg00159243	1.26235	5.8498e-11	1.84186e-09	37	12	109023799	R	SELPLG	NM_003006	5'UTR					TRUE	12:109023520-109023885	Promoter_Associated	TRUE
cg00159289	1.96849	4.34688e-12	1.68281e-10	37	7	100844060	F	MOGAT3	NM_178176	1stExon	chr7:100845050-100845726	N_Shore			TRUE			TRUE
cg00159780	-0.769822	0.000853831	0.00595085	37	8	86574469	F	REXO1L2P;REXO1L1	NR_003594;NM_172239	Body;1stExon	chr8:86573421-86575248	Island			NA			NA
cg00159799	0.51871	2.50236e-06	3.2651e-05	37	19	14552013	R	PKN1;PKN1	NM_002741;NM_213560	Body;Body	chr19:14551998-14552255	Island			NA			NA
cg00160183	1.42035	2.54451e-05	0.000265291	37	13	28551730	F				chr13:28551514-28552973	Island			NA			NA
cg00160262	-1.13444	0.000760118	0.00537704	37	1	158533225	F	OR6P1	NM_001160325	1stExon					NA			NA
cg00160359	-0.491732	0.000130479	0.00114101	37	12	49178192	R	ADCY6;ADCY6	NM_020983;NM_015270	5'UTR;TSS1500	chr12:49176427-49177154	S_Shore			NA			NA
cg00160388	0.664735	0.000344743	0.00269134	37	16	14403425	R								TRUE	16:14402946-14403781	Unclassified	NA
cg00160440	-0.994794	1.06746e-06	1.50509e-05	37	4	134077575	F	PCDH10	NM_032961	Body	chr4:134071662-134073628	S_Shelf			NA			NA
cg00160886	0.9272	1.93689e-07	3.16913e-06	37	3	157216105	R	VEPH1;VEPH1;VEPH1;VEPH1;VEPH1	NM_001167911;NM_024621;NM_001167915;NM_001167916;NM_001167912	5'UTR;5'UTR;5'UTR;5'UTR;5'UTR					TRUE			NA
cg00161556	1.12047	2.42107e-05	0.000253615	37	11	19138045	R	ZDHHC13;ZDHHC13	NM_001001483;NM_019028	TSS1500;TSS1500	chr11:19138497-19139216	N_Shore			NA	11:19137953-19139443	Promoter_Associated	NA
cg00161878	-0.588138	1.09261e-06	1.53708e-05	37	10	135015300	F	KNDC1	NM_152643	Body	chr10:135014703-135015402	Island			NA			NA
cg00161955	1.57021	4.2901e-10	1.15878e-08	37	8	82608057	R	SLC10A5	NM_001010893	TSS1500					NA			NA
cg00162001	-0.952937	0.000421502	0.0032135	37	2	42479385	F	EML4;EML4	NM_001145076;NM_019063	Body;Body					TRUE			NA
cg00162064	1.02543	0.000929212	0.0064069	37	1	44998151	F	RNF220	NM_018150	Body					TRUE			NA
cg00162104	0.770594	6.6553e-06	7.92982e-05	37	4	2926894	R	ADD1;ADD1;ADD1;ADD1	NM_014189;NM_001119;NM_176801;NM_014190	Body;Body;Body;Body	chr4:2928053-2928271	N_Shore			NA			NA
cg00162806	1.48268	9.88667e-08	1.7137e-06	37	10	135051929	R	VENTX	NM_014468	Body	chr10:135048797-135052077	Island			TRUE			NA
cg00162859	1.1341	1.26036e-07	2.13944e-06	37	8	131268256	F	ASAP1	NM_018482	Body					TRUE			NA
cg00163199	0.800406	6.09895e-05	0.000579653	37	17	18089483	R	ALKBH5	NM_017758	Body	chr17:18086258-18088360	S_Shore		RDMR	NA			NA
cg00163372	2.51757	5.48304e-10	1.45073e-08	37	8	128752988	F	MYC	NM_002467	Body	chr8:128747805-128751279	S_Shore			NA			NA
cg00163541	-0.968559	0.000593362	0.00433151	37	1	238811442	R								TRUE			NA
cg00163549	0.436498	0.000191296	0.00159869	37	6	33246185	F	B3GALT4	NM_003782	1stExon	chr6:33244677-33245554	S_Shore			NA	6:33244505-33246488	Promoter_Associated	NA
cg00163674	-1.1333	0.000151848	0.00130397	37	21	46115778	F	KRTAP10-12;C21orf29	NM_198699;NM_144991	TSS1500;Body					NA			NA
cg00163702	-1.42048	2.61584e-10	7.32911e-09	37	16	81254719	R	PKD1L2;PKD1L2	NM_052892;NM_001076780	TSS1500;TSS1500					NA			NA
cg00164189	1.04013	1.62052e-09	3.93226e-08	37	22	30821186	R	MTP18;MTP18;SEC14L2	NM_001003704;NM_016498;NM_012429	TSS1500;TSS1500;3'UTR	chr22:30821625-30822010	N_Shore			NA			NA
cg00164949	0.711344	0.00146621	0.00951782	37	17	43037427	R	C1QL1	NM_006688	3'UTR	chr17:43037166-43037740	Island		DMR	TRUE			NA
cg00164997	1.33543	2.18627e-10	6.21303e-09	37	6	25042548	F								NA	6:25041980-25042604	Promoter_Associated	NA
cg00165994	0.801123	0.000252457	0.0020428	37	1	62054902	R								TRUE	1:62053958-62055531	Unclassified	NA
cg00166352	1.43235	4.45509e-07	6.77178e-06	37	4	183836691	R	DCTD;DCTD	NM_001921;NM_001012732	Body;Body	chr4:183838036-183839286	N_Shore			NA			NA
cg00166915	1.37845	1.91995e-05	0.000205653	37	14	101361359	R	MEG8	NR_024149	Body					NA			NA
cg00167158	1.5549	2.02047e-06	2.68881e-05	37	2	157909644	R								TRUE			NA
cg00167670	-1.81302	7.11681e-07	1.03923e-05	37	4	13922944	R								TRUE			TRUE
cg00167684	1.10873	2.22336e-05	0.000234904	37	16	70505196	F	FUK	NM_145059	Body	chr16:70507026-70507246	N_Shore			NA			TRUE
cg00167820	-0.679688	7.64552e-06	8.98549e-05	37	8	131663355	R								TRUE	8:131663199-131663748	Unclassified_Cell_type_specific	NA
cg00167916	1.35801	9.66905e-14	5.02431e-12	37	6	32795877	R	TAP2;TAP2	NM_000544;NM_018833	3'UTR;Body					NA			NA
cg00167958	0.479858	0.000223112	0.00183134	37	22	42677969	R				chr22:42679333-42679893	N_Shore			NA			NA
cg00168032	1.04757	0.000242845	0.0019738	37	4	160018054	R								TRUE			NA
cg00168634	-0.538366	0.00025502	0.00206108	37	4	154572830	F								TRUE	4:154572738-154573073	Unclassified_Cell_type_specific	NA
cg00169019	0.99423	1.84167e-05	0.000198184	37	6	32056438	F	TNXB	NM_019105	Body	chr6:32055067-32055601	S_Shore			NA			NA
cg00169725	1.24434	3.57057e-05	0.000359831	37	5	176543901	R				chr5:176543900-176544228	Island			TRUE	5:176543565-176544350	Unclassified_Cell_type_specific	NA
cg00169776	-1.36431	3.26418e-09	7.49435e-08	37	1	2948512	F								NA			NA
cg00169782	1.48824	1.18755e-12	5.06947e-11	37	17	39791734	F								TRUE	17:39791401-39791864	Unclassified_Cell_type_specific	NA
cg00169897	-0.733954	0.000321958	0.00253432	37	16	89098782	R							CDMR	NA	16:89098192-89098955	Unclassified_Cell_type_specific	NA
cg00170295	0.649697	1.01633e-05	0.000116138	37	6	46720370	F	LOC100287718	NM_001162435	Body					NA			NA
cg00170438	0.421742	0.00103938	0.007065	37	20	60792389	R	HRH3	NM_007232	Body	chr20:60794179-60796121	N_Shore			NA			NA
cg00170620	1.64549	2.9514e-13	1.40673e-11	37	16	56669038	R				chr16:56669037-56669727	Island		RDMR	NA			NA
cg00170931	1.52065	1.57367e-15	1.13163e-13	37	13	51915353	R	SERPINE3	NM_001101320	1stExon					NA			NA
cg00171092	-0.646071	1.09475e-05	0.000124274	37	3	124531371	F	ITGB5	NM_002213	Body					TRUE			TRUE
cg00171578	0.860167	8.93923e-06	0.000103432	37	1	147789747	R				chr1:147789652-147790094	Island		RDMR	NA			NA
cg00172603	0.887944	9.57709e-07	1.36406e-05	37	1	54822031	F	SSBP3;SSBP3;SSBP3	NM_001009955;NM_018070;NM_145716	Body;Body;Body	chr1:54821990-54822333	Island			NA			NA
cg00173005	-1.87567	2.06797e-05	0.000219988	37	1	158258366	R	CD1C	NM_001765	TSS1500					NA			NA
cg00173098	0.659	4.80132e-07	7.25238e-06	37	20	1445335	F	NSFL1C;NSFL1C;NSFL1C	NM_182483;NM_016143;NM_018839	5'UTR;Body;Body	chr20:1446936-1447729	N_Shore			NA			NA
cg00173659	-1.47041	1.51413e-07	2.53051e-06	37	7	156871088	F				chr7:156871054-156871297	Island			TRUE			NA
cg00173906	-0.732942	0.000659954	0.00475305	37	3	112871562	R								TRUE			NA
cg00174508	-1.50668	9.4206e-05	0.000855168	37	12	107774298	F	BTBD11	NM_001018072	Body					TRUE			NA
cg00174573	0.883204	0.000144556	0.00124903	37	12	125172635	R								TRUE	12:125172381-125172957	Unclassified_Cell_type_specific	NA
cg00174718	0.948933	0.00010848	0.000969804	37	6	47136110	R								TRUE			TRUE
cg00175702	0.65491	7.94046e-05	0.000733443	37	1	2109388	F	PRKCZ;PRKCZ;PRKCZ	NM_001033581;NM_001033582;NM_002744	Body;Body;Body					NA			NA
cg00175735	-0.847278	1.11134e-06	1.56128e-05	37	3	99903386	R	TMEM30C;TMEM30C	NR_028358;NR_028357	TSS1500;TSS1500					TRUE			NA
cg00175823	-0.782533	2.19352e-05	0.000232158	37	12	132977140	R				chr12:132976250-132976535	S_Shore			NA	12:132976714-132977176	Unclassified_Cell_type_specific	NA
cg00175838	-0.504976	0.000238517	0.00194226	37	6	31695027	F	DDAH2	NM_013974	Body	chr6:31695894-31698245	N_Shore			NA			NA
cg00175895	2.00735	3.21406e-17	3.2078e-15	37	4	1578077	R				chr4:1580050-1580455	N_Shore			NA			NA
cg00176043	-1.04493	7.87513e-06	9.2298e-05	37	1	67900465	R				chr1:67895135-67896826	S_Shelf			NA			NA
cg00176111	-0.988956	2.58039e-06	3.35777e-05	37	1	27331151	F				chr1:27332593-27332982	N_Shore			TRUE			NA
cg00176210	0.976387	3.45284e-05	0.000349019	37	8	41654967	R	ANK1;ANK1;ANK1;ANK1;ANK1	NM_020476;NM_020475;NM_001142446;NM_020477;NM_000037	Body;Body;Body;Body;Body	chr8:41654875-41655984	Island			NA	8:41654959-41655898	Unclassified_Cell_type_specific	TRUE
cg00176835	-0.487637	2.24513e-06	2.95986e-05	37	17	18878136	R	SLC5A10;FAM83G;SLC5A10	NM_001042450;NM_001039999;NM_152351	Body;Body;Body	chr17:18874684-18874887	S_Shelf			NA	17:18878046-18878264	Unclassified_Cell_type_specific	NA
cg00176863	-2.5841	7.76222e-10	1.99689e-08	37	14	103396890	F	AMN	NM_030943	Body	chr14:103394397-103397070	Island			NA			NA
cg00177239	-1.0964	2.84751e-05	0.000293491	37	10	116581112	R	FAM160B1;FAM160B1	NM_020940;NM_001135051	TSS1500;TSS1500	chr10:116581522-116582434	N_Shore			NA	10:116580798-116582452	Promoter_Associated	NA
cg00177243	-0.697535	0.000147014	0.00126782	37	10	18434068	F	CACNB2;CACNB2;CACNB2;CACNB2;CACNB2;CACNB2	NM_201571;NM_201593;NM_201597;NM_201572;NM_201596;NM_001167945	Body;Body;Body;Body;Body;Body	chr10:18429125-18430234	S_Shelf			NA			NA
cg00177388	-2.33259	7.63477e-14	4.03459e-12	37	5	72677886	R				chr5:72676120-72678421	Island			TRUE	5:72676801-72678409	Unclassified_Cell_type_specific	NA
cg00178119	-1.42426	9.77958e-08	1.69665e-06	37	8	105235184	F	RIMS2;RIMS2	NM_014677;NM_001100117	Body;Body	chr8:105235384-105235979	N_Shore			NA			NA
cg00178122	0.526359	0.000295176	0.00234583	37	1	151039847	R	MLLT11	NM_006818	Body	chr1:151042870-151043537	N_Shelf			NA			NA
cg00178359	1.47452	2.70262e-13	1.29556e-11	37	16	56659460	R	MT1E	NM_175617	TSS200	chr16:56659107-56659660	Island			NA	16:56658962-56660177	Unclassified_Cell_type_specific	TRUE
cg00178562	0.826473	1.22213e-07	2.07913e-06	37	1	16966354	F								NA	1:16966260-16966468	Promoter_Associated_Cell_type_specific	NA
cg00178728	-1.05303	4.75948e-07	7.19371e-06	37	4	22516158	R	GPR125	NM_145290	Body	chr4:22516856-22518048	N_Shore			NA			NA
cg00178864	0.908245	1.17437e-05	0.000132464	37	4	140201574	F	C4orf49	NM_032623	TSS200	chr4:140201064-140201449	S_Shore			NA			TRUE
cg00178928	0.606512	3.594e-05	0.000361882	37	2	233366275	R				chr2:233367780-233368577	N_Shore			TRUE			NA
cg00178984	-0.954642	0.00109987	0.00741726	37	12	60091171	F	SLC16A7	NM_004731	5'UTR					NA			NA
cg00179217	1.39461	0.000202377	0.00168007	37	6	31831340	R	SLC44A4;NEU1	NM_025257;NM_000434	3'UTR;TSS1500	chr6:31830299-31830948	S_Shore			NA	6:31831285-31832200	Promoter_Associated	NA
cg00179663	-2.39678	3.59761e-17	3.55314e-15	37	4	92189705	R	FAM190A	NM_001145065	Body					TRUE			NA
cg00179921	0.894821	4.45235e-10	1.19911e-08	37	22	39927437	R	RPS19BP1	NM_194326	Body	chr22:39928303-39929071	N_Shore			NA	22:39927309-39929400	Promoter_Associated	NA
cg00180666	-0.924461	1.10496e-06	1.55312e-05	37	20	56283207	R	PMEPA1;PMEPA1;PMEPA1;PMEPA1	NM_199171;NM_199170;NM_199169;NM_020182	5'UTR;5'UTR;Body;Body	chr20:56283891-56285395	N_Shore		DMR	TRUE			NA
cg00181676	-0.748021	0.000363654	0.0028218	37	3	196325301	R								NA	3:196324997-196325654	Unclassified_Cell_type_specific	NA
cg00181889	-1.23145	6.54134e-10	1.70682e-08	37	4	154261731	F				chr4:154265607-154266394	N_Shelf			NA			NA
cg00182256	-0.789888	0.00136017	0.00892145	37	22	49376518	F				chr22:49376395-49376660	Island		RDMR	NA			NA
cg00182273	0.722186	1.79855e-05	0.000194082	37	16	66876847	R	CA7	NM_005182	TSS1500	chr16:66878172-66879072	N_Shore			NA	16:66876626-66876904	Unclassified_Cell_type_specific	NA
cg00182421	1.46366	0.000277372	0.00221857	37	3	170586396	R	RPL22L1	NM_001099645	Body	chr3:170587936-170588270	N_Shore			NA			NA
cg00183639	0.492865	3.08599e-05	0.000315273	37	20	47834055	R				chr20:47835783-47836067	N_Shore			NA	20:47833305-47834135	Unclassified	NA
cg00183888	-0.861799	8.97964e-05	0.000819334	37	7	155276880	R								NA			NA
cg00184032	-2.22605	9.77163e-10	2.46728e-08	37	3	31494263	F								NA			NA
cg00184203	1.72143	8.28388e-12	3.04754e-10	37	2	187558402	R	FAM171B	NM_177454	TSS1500	chr2:187558794-187559012	N_Shore			NA			NA
cg00184235	-0.333772	0.00105961	0.00718214	37	8	126442434	F	TRIB1	NM_025195	TSS200	chr8:126441471-126443552	Island			NA	8:126441980-126442446	Unclassified	NA
cg00184279	1.88955	1.52525e-05	0.000167489	37	6	2986848	F	DKFZP686I15217;DKFZP686I15217	NR_026856;NR_026855	TSS1500;TSS1500	chr6:2988855-2989549	N_Shelf			NA			NA
cg00184461	0.598883	8.58178e-06	9.96919e-05	37	9	139409725	R	NOTCH1	NM_017617	Body	chr9:139409724-139410219	Island			NA	9:139409656-139409798	Unclassified_Cell_type_specific	NA
cg00184953	-1.9566	1.29824e-09	3.20481e-08	37	6	31146222	R	PSORS1C3	NR_026816	TSS1500	chr6:31148369-31148577	N_Shelf			NA			NA
cg00185622	-0.203324	0.000802293	0.00563799	37	2	197504238	F	CCDC150	NM_001080539	TSS200	chr2:197504191-197504558	Island			NA	2:197503822-197505376	Promoter_Associated	NA
cg00185660	2.11244	2.0848e-14	1.22347e-12	37	10	131667994	R	EBF3	NM_001005463	Body	chr10:131666016-131666315	S_Shore			NA			NA
cg00186374	-0.865692	8.63463e-07	1.24053e-05	37	2	151659068	R								TRUE			NA
cg00186701	1.68297	1.91187e-11	6.57449e-10	37	8	98290510	R	TSPYL5	NM_033512	TSS1500	chr8:98289604-98290404	S_Shore			NA	8:98289986-98290577	Promoter_Associated	TRUE
cg00186909	-1.46494	7.87237e-05	0.000727763	37	12	93129288	R	PLEKHG7	NM_001004330	TSS1500					TRUE			NA
cg00187120	0.912797	0.000187328	0.00156952	37	7	54731309	F				chr7:54731779-54732479	N_Shore			NA			NA
cg00187244	1.09435	6.2546e-10	1.63724e-08	37	22	41492007	F	EP300	NM_001429	Body	chr22:41487261-41489159	S_Shelf			NA			NA
cg00187437	0.870555	3.07568e-06	3.9398e-05	37	6	31089157	R	CDSN;PSORS1C1	NM_001264;NM_014068	TSS1500;5'UTR					NA			NA
cg00187557	1.47785	9.47205e-17	8.58981e-15	37	5	139081136	R				chr5:139081001-139081202	Island			NA			NA
cg00188032	2.79076	1.50288e-24	6.93304e-22	37	5	96141721	F	ERAP1;ERAP1	NM_001040458;NM_016442	5'UTR;5'UTR	chr5:96143102-96143885	N_Shore			NA			NA
cg00188627	1.48933	3.80616e-07	5.86498e-06	37	3	159557779	R	SCHIP1	NM_014575	Body				RDMR	NA			NA
cg00188748	0.910877	1.512e-05	0.000166177	37	9	130564509	F	FPGS;FPGS	NM_001018078;NM_004957	TSS1500;TSS1500	chr9:130564863-130565566	N_Shore			NA			NA
cg00191625	-0.737766	8.12998e-05	0.000749522	37	22	40021996	R	CACNA1I;CACNA1I	NM_001003406;NM_021096	Body;Body				DMR	NA			NA
cg00191957	0.686727	0.000199923	0.00166237	37	6	43476766	F	C6orf154	NM_001012974	Body	chr6:43477221-43478553	N_Shore			NA			NA
cg00192882	0.567175	0.000903423	0.00624938	37	17	19291120	R	MFAP4	NM_002404	TSS1500					TRUE			TRUE
cg00193947	-0.751896	0.000275413	0.00220506	37	9	118687943	R	C9orf27	NR_024032	TSS1500					NA			NA
cg00193959	-2.2474	6.12069e-20	1.06623e-17	37	10	129232405	R	DOCK1	NM_001380	Body					TRUE			NA
cg00193963	-2.93532	2.86217e-15	1.96136e-13	37	7	29923832	F	WIPF3	NM_001080529	Body	chr7:29923882-29924264	N_Shore			NA	7:29923588-29923865	Unclassified_Cell_type_specific	NA
cg00194126	1.36876	0.0010549	0.00715544	37	2	157186312	R	NR4A2	NM_006186	Body	chr2:157185557-157186355	Island		RDMR	NA	2:157186244-157186739	Unclassified_Cell_type_specific	NA
cg00196407	0.843746	0.00010939	0.000977143	37	17	959496	R	ABR;ABR;ABR	NM_021962;NM_001092;NM_001159746	Body;Body;Body					TRUE	17:959097-959617	Unclassified	NA
cg00196660	-0.584549	0.000700207	0.00500354	37	17	73720645	F	ITGB4;ITGB4;ITGB4	NM_000213;NM_001005731;NM_001005619	5'UTR;5'UTR;TSS200	chr17:73717023-73717847	S_Shelf			NA			NA
cg00197173	1.48032	3.77732e-17	3.71183e-15	37	6	44125647	R	CAPN11	NM_007058	TSS1500					NA			NA
cg00197322	-0.514238	0.000186025	0.00155973	37	7	1990554	F	MAD1L1;MAD1L1;MAD1L1	NM_003550;NM_001013837;NM_001013836	Body;Body;Body	chr7:1991914-1992122	N_Shore			NA			NA
cg00198586	0.878145	1.16709e-06	1.63195e-05	37	3	123861151	F	KALRN;KALRN;KALRN	NR_028136;NM_001024660;NM_003947	Body;Body;Body					TRUE			NA
cg00199065	-0.717495	1.26129e-05	0.000141188	37	21	37093340	R								NA			NA
cg00199091	0.787206	0.00147958	0.0095922	37	6	42228954	F	TRERF1	NM_033502	Body	chr6:42227081-42227488	S_Shore			TRUE	6:42228422-42229662	Gene_Associated	TRUE
cg00200645	0.85989	6.94921e-05	0.000651505	37	17	58235778	F	CA4	NM_000717	Body					TRUE			NA
cg00200876	-0.608356	0.000288207	0.00229619	37	16	68731696	F	CDH3	NM_001793	Body	chr16:68732058-68732306	N_Shore			NA			NA
cg00201025	2.50395	2.65562e-16	2.22194e-14	37	3	137832372	F	DZIP1L;DZIP1L	NM_173543;NM_001170538	5'UTR;TSS200	chr3:137833848-137834592	N_Shore			NA			NA
cg00201275	0.530609	0.000522124	0.00387487	37	6	43974774	R				chr6:43970073-43970922	S_Shelf			NA			NA
cg00201534	-0.785605	1.26283e-05	0.000141345	37	21	46056911	F	KRTAP10-10;C21orf29	NM_181688;NM_144991	TSS1500;Body					NA			NA
cg00201819	-1.05501	4.61138e-06	5.68294e-05	37	10	134910421	R	GPR123	NM_001083909	Body	chr10:134911976-134912483	N_Shore			NA	10:134910189-134910447	Unclassified_Cell_type_specific	NA
cg00202479	0.55777	0.000535162	0.00395946	37	6	31760383	R	VARS	NM_006295	Body	chr6:31763240-31763905	N_Shelf			NA	6:31758726-31760405	Gene_Associated	NA
cg00203124	1.54936	5.026e-09	1.11593e-07	37	5	153860358	R				chr5:153862142-153862451	N_Shore		CDMR	NA			NA
cg00204532	0.609801	0.00013875	0.00120494	37	3	4533398	R				chr3:4534412-4535367	N_Shore			NA			NA
cg00204976	1.31346	1.40511e-08	2.86605e-07	37	2	237475243	R				chr2:237476311-237477263	N_Shore			NA			NA
cg00205605	0.757375	5.61653e-10	1.48316e-08	37	1	2516401	R				chr1:2517397-2518892	N_Shore			TRUE	1:2516313-2516563	Promoter_Associated_Cell_type_specific	NA
cg00205756	1.14415	2.46313e-06	3.21978e-05	37	16	7762118	R	A2BP1;A2BP1;A2BP1;A2BP1;A2BP1;A2BP1	NM_001142334;NM_145893;NM_018723;NM_145891;NM_001142333;NM_145892	3'UTR;3'UTR;3'UTR;3'UTR;3'UTR;3'UTR					NA			NA
cg00206063	-2.17267	7.0132e-07	1.02513e-05	37	10	3805252	R								NA			NA
cg00206271	-1.08123	5.11839e-08	9.38492e-07	37	2	1166205	R	SNTG2	NM_018968	Body	chr2:1163016-1163820	S_Shelf			NA			NA
cg00206356	0.953923	9.57412e-07	1.36378e-05	37	4	56659922	R				chr4:56659626-56660144	Island			NA			NA
cg00207731	1.69499	2.47845e-13	1.19343e-11	37	15	91416118	R	FURIN	NM_002569	5'UTR	chr15:91414311-91415427	S_Shore			TRUE	15:91416104-91416970	Promoter_Associated	TRUE
cg00208218	-1.91658	1.45817e-05	0.000160859	37	2	71251453	R	OR7E91P	NR_002185	Body					NA			NA
cg00208504	0.706203	0.000730946	0.00519598	37	4	140200520	R	C4orf49	NM_032623	Body	chr4:140201064-140201449	N_Shore		RDMR	NA	4:140200227-140201154	Unclassified_Cell_type_specific	NA
cg00208830	-1.69964	2.40374e-10	6.77768e-09	37	1	183154778	F	LAMC2;LAMC2	NM_018891;NM_005562	TSS1500;TSS1500					NA			NA
cg00209037	-0.709932	4.85955e-06	5.95905e-05	37	22	46443395	R				chr22:46440393-46441019	S_Shelf			NA			NA
cg00209623	0.743888	2.39888e-06	3.14285e-05	37	3	193851106	R				chr3:193851699-193852042	N_Shore			NA			NA
cg00209786	1.37022	1.54472e-14	9.25845e-13	37	20	56752779	R				chr20:56754677-56755105	N_Shore			NA			NA
cg00210186	0.434951	0.00020186	0.00167629	37	9	37905641	F	MCART1;MCART1;MCART1	NR_024872;NR_024873;NM_033412	TSS1500;TSS1500;TSS1500	chr9:37903630-37904475	S_Shore			NA			NA
cg00210249	2.85728	4.13842e-15	2.75447e-13	37	10	71135679	R	HK1;HK1;HK1;HK1;HK1	NM_033500;NM_000188;NM_033498;NM_033497;NM_033496	Body;Body;Body;Body;Body					TRUE			TRUE
cg00210271	1.46542	7.08876e-07	1.03543e-05	37	12	54088934	F				chr12:54089211-54089413	N_Shore		CDMR	NA	12:54088925-54089720	Unclassified	NA
cg00210768	0.650041	4.21856e-07	6.44468e-06	37	17	21200454	R	MAP2K3;MAP2K3	NM_002756;NM_145109	5'UTR;Body					TRUE			TRUE
cg00211174	-1.24055	4.08251e-08	7.63665e-07	37	3	127332098	R	MCM2	NM_004526	Body					TRUE			NA
cg00211496	0.851398	6.45746e-05	0.000610157	37	7	39234456	F	POU6F2;POU6F2	NM_007252;NM_001166018	Body;Body					NA			NA
cg00211623	0.465608	0.00134005	0.00880538	37	3	75658490	F								NA			NA
cg00211821	-0.52104	0.000300711	0.00238462	37	17	16978673	R	MPRIP;MPRIP	NM_015134;NM_201274	Body;Body					TRUE			NA
cg00212470	0.807242	5.78923e-06	6.98814e-05	37	1	41301421	F	KCNQ4;KCNQ4	NM_004700;NM_172163	Body;Body	chr1:41303355-41304436	N_Shore			TRUE			NA
cg00212520	-0.795798	6.63203e-11	2.0731e-09	37	3	42451096	R	LYZL4	NM_144634	5'UTR					NA			NA
cg00212521	1.07628	0.000304779	0.00241354	37	1	240370408	F	FMN2	NM_020066	Body	chr1:240370859-240371526	N_Shore			NA			NA
cg00213281	2.69039	7.44677e-14	3.94187e-12	37	2	149639822	R	KIF5C;MIR1978	NM_004522;NR_031742	Body;TSS1500					NA			NA
cg00213295	1.15082	2.72832e-06	3.53111e-05	37	17	32925561	R	TMEM132E	NM_207313	Body					TRUE			NA
cg00213301	1.02306	0.000177577	0.00149711	37	15	37170017	R	LOC145845	NR_024264	Body	chr15:37172473-37173018	N_Shelf		RDMR	NA			NA
cg00214171	0.954693	1.0817e-09	2.71358e-08	37	17	73642991	R	RECQL5;LOC100130933	NM_004259;NM_001162997	Body;5'UTR					NA			NA
cg00214688	-0.356834	0.000964564	0.0066201	37	10	33201038	R	ITGB1;ITGB1;ITGB1;ITGB1;ITGB1;ITGB1	NM_033668;NM_133376;NM_002211;NM_033667;NM_033669;NM_033666	Body;Body;Body;Body;Body;Body			low-CpG:33241039-33241046		NA			NA
cg00215019	-1.66495	6.50952e-07	9.58031e-06	37	10	50311040	R	C10orf72;C10orf72	NM_001031746;NM_144984	Body;3'UTR					NA			NA
cg00216061	0.404356	0.000927342	0.00639466	37	16	88547579	R	ZFPM1	NM_153813	Body					NA			NA
cg00216138	2.02459	4.21027e-08	7.85436e-07	37	15	37171175	R	LOC145845	NR_024264	Body	chr15:37172473-37173018	N_Shore		RDMR	TRUE			NA
cg00216180	1.34051	4.80882e-15	3.16452e-13	37	13	114778713	R	RASA3	NM_007368	Body	chr13:114778525-114778809	Island			NA			NA
cg00216901	0.936155	1.81814e-07	2.99089e-06	37	20	36156919	F	BLCAP;BLCAP;BLCAP;BLCAP	NM_001167820;NM_001167822;NM_001167821;NM_006698	TSS1500;TSS1500;TSS1500;TSS1500	chr20:36156022-36156669	S_Shore			NA	20:36155422-36157045	Promoter_Associated	NA
cg00217953	-0.569946	0.00115881	0.00776061	37	2	97527635	R	SEMA4C	NM_017789	Body	chr2:97527489-97527704	Island			NA			NA
cg00218406	2.40471	3.29022e-11	1.08487e-09	37	6	31431407	R	HCP5	NM_006674	3'UTR				DMR	NA	6:31430369-31431494	Promoter_Associated	NA
cg00218409	2.83264	7.90723e-16	6.02955e-14	37	2	74963008	R								TRUE			NA
cg00218415	-0.739711	2.20495e-10	6.26045e-09	37	20	60586720	F	TAF4	NM_003185	Body	chr20:60587264-60587488	N_Shore			NA			NA
cg00218447	-4.01451	3.95172e-16	3.20001e-14	37	12	54428171	F	HOXC4;HOXC5;HOXC5	NM_014620;NR_003084;NM_018953	5'UTR;Body;Body	chr12:54427025-54428709	Island			NA			NA
cg00218628	2.04054	1.12106e-07	1.92243e-06	37	12	31255279	R	DDX11;DDX11;DDX11	NM_004399;NM_152438;NM_030653	Body;Body;Body					NA			NA
cg00218707	-0.546245	0.000157669	0.00134789	37	15	75587027	R	GOLGA6D	NM_001145224	3'UTR					NA			NA
cg00219210	-0.670172	0.000775508	0.00547258	37	17	12893648	R	RICH2	NM_014859	3'UTR					NA			NA
cg00219282	1.07848	4.04221e-08	7.56508e-07	37	6	159654898	R	FNDC1	NM_032532	Body	chr6:159653233-159655397	Island			NA			NA
cg00219303	-1.08477	2.14732e-05	0.000227675	37	22	38146969	R	TRIOBP;TRIOBP;TRIOBP	NM_007032;NM_001039141;NM_138632	Body;Body;Body	chr22:38141761-38142999	S_Shelf			NA			NA
cg00219585	0.67667	3.00072e-05	0.000307409	37	12	2114225	F	DCP1B	NM_152640	TSS1500	chr12:2113343-2113881	S_Shore			NA			NA
cg00219816	1.42063	4.60159e-07	6.97367e-06	37	8	96280555	R	C8orf37	NM_177965	Body	chr8:96280844-96281747	N_Shore			NA			NA
cg00220335	0.865856	3.36268e-07	5.24103e-06	37	5	1343783	R	CLPTM1L	NM_030782	Body	chr5:1344545-1345469	N_Shore			NA			NA
cg00220661	1.0649	1.60185e-06	2.17522e-05	37	18	74241269	R	LOC284276	NR_015417	Body				RDMR	NA			NA
cg00220955	-0.226642	0.00149411	0.009673	37	16	68279164	R	PLA2G15	NM_012320	TSS200	chr16:68278870-68279628	Island			NA	16:68278713-68279890	Promoter_Associated	NA
cg00221718	-2.86854	5.619e-22	1.51852e-19	37	3	128914668	R								TRUE			TRUE
cg00221736	0.459046	1.14521e-05	0.000129495	37	7	86819455	R	DMTF1;DMTF1;DMTF1;DMTF1;DMTF1	NM_001142326;NM_021145;NM_001142327;NR_024550;NR_024549	Body;Body;Body;Body;Body					NA			NA
cg00221794	1.28219	3.36497e-06	4.27286e-05	37	2	20776620	F							DMR	NA	2:20776324-20776793	Unclassified	NA
cg00222472	-1.27469	6.87892e-05	0.000645525	37	1	164545783	F	PBX1	NM_002585	Body	chr1:164545540-164545917	Island			NA			NA
cg00223186	-0.421353	0.00135694	0.00890401	37	1	180472200	R	ACBD6	NM_032360	TSS200	chr1:180471325-180472277	Island			NA	1:180471061-180473001	Promoter_Associated	NA
cg00223245	1.18902	8.51546e-06	9.90146e-05	37	3	64307530	F								TRUE			TRUE
cg00223681	1.91772	1.94964e-09	4.66125e-08	37	2	177024117	R				chr2:177024501-177025692	N_Shore			NA			NA
cg00223715	-0.770889	1.2292e-06	1.71117e-05	37	22	49063003	R	FAM19A5;FAM19A5	NM_015381;NM_001082967	Body;Body	chr22:49063538-49063900	N_Shore			NA			NA
cg00223899	1.88481	3.88596e-08	7.29507e-07	37	16	88299326	R							DMR	NA			NA
cg00224083	1.11987	0.000400156	0.00306965	37	4	139773135	F								TRUE			NA
cg00225697	-0.894526	0.000336923	0.00263716	37	6	112684258	R				chr6:112683759-112683979	S_Shore			NA			NA
cg00225858	1.58838	8.80673e-09	1.87073e-07	37	16	84223841	R	ADAD2;ADAD2	NM_139174;NM_001145400	TSS1500;TSS1500	chr16:84224731-84225085	N_Shore			NA			NA
cg00226580	2.41702	2.1221e-09	5.0355e-08	37	5	89000691	F								TRUE			NA
cg00226831	-0.669547	0.000902844	0.00624601	37	15	42371511	R	PLA2G4D	NM_178034	Body	chr15:42371634-42371842	N_Shore			TRUE			NA
cg00226904	-0.573191	1.50123e-05	0.000165131	37	18	61157065	F	SERPINB5	NM_002639	Body					NA			NA
cg00226984	-0.569961	8.76277e-07	1.25761e-05	37	2	239047305	F	KLHL30	NM_198582	TSS200	chr2:239048071-239048454	N_Shore			NA			TRUE
cg00228390	-1.30964	0.00094321	0.00649201	37	6	168197667	R	C6orf123	NR_026773	TSS200	chr6:168197142-168198164	Island			NA			NA
cg00228689	0.68862	4.12034e-05	0.000408363	37	1	53742112	F	LRP8;LRP8;LRP8;LRP8	NM_033300;NM_001018054;NM_017522;NM_004631	Body;Body;Body;Body	chr1:53742297-53742845	N_Shore			NA			NA
cg00228738	0.907384	1.18947e-10	3.5537e-09	37	9	95944545	R				chr9:95946147-95947835	N_Shore			NA	9:95944504-95944707	Unclassified_Cell_type_specific	NA
cg00228796	0.834319	2.39724e-06	3.141e-05	37	1	21670736	R	ECE1	NM_001113348	Body	chr1:21671360-21672319	N_Shore			NA	1:21670736-21672679	Promoter_Associated	NA
cg00228891	-1.25296	0.000648619	0.00468216	37	1	207818893	F	CR1L	NM_175710	Body	chr1:207818389-207818952	Island			NA	1:207818142-207818927	Unclassified	NA
cg00229755	0.749157	6.02401e-08	1.08844e-06	37	2	96679346	R	LOC729234	NR_003698	Body	chr2:96676160-96676733	S_Shelf			NA			NA
cg00230120	-1.06638	8.75593e-10	2.23127e-08	37	12	1609346	F	LOC100292680	NR_028415	TSS1500					TRUE			TRUE
cg00230183	1.08445	6.7421e-07	9.89013e-06	37	16	88882565	R	GALNS	NM_000512	Body	chr16:88883056-88883461	N_Shore			NA	16:88881939-88882888	Unclassified	TRUE
cg00230517	1.00784	0.000169372	0.00143542	37	2	65648650	R	SPRED2	NM_181784	Body					TRUE			NA
cg00230715	0.736125	0.000399247	0.00306325	37	5	106854267	R	EFNA5	NM_001962	Body					TRUE			NA
cg00230766	-0.930908	1.64718e-07	2.73137e-06	37	2	9388337	R	ASAP2;ASAP2	NM_001135191;NM_003887	Body;Body					TRUE			NA
cg00231504	-2.2401	4.72321e-09	1.05357e-07	37	6	100906448	R	SIM1	NM_005068	Body	chr6:100905952-100906686	Island			NA			NA
cg00231810	-1.04781	0.000520424	0.0038638	37	7	155353618	R								NA			NA
cg00232160	0.746491	5.99293e-05	0.000570841	37	9	129468157	F				chr9:129468130-129468336	Island			NA			NA
cg00232453	0.854318	6.99191e-08	1.24768e-06	37	6	31864574	F	EHMT2;EHMT2	NM_006709;NM_025256	Body;Body	chr6:31864897-31865419	N_Shore			NA			NA
cg00232500	1.52071	1.9792e-20	3.83251e-18	37	9	14910689	R	FREM1	NM_144966	TSS1500					NA			NA
cg00232952	-0.52727	6.21322e-05	0.000589429	37	18	30047736	F	FAM59A	NM_022751	Body	chr18:30050115-30051345	N_Shelf			NA			NA
cg00232996	1.28764	6.21739e-11	1.95021e-09	37	6	32094729	F	ATF6B;ATF6B	NM_004381;NM_001136153	Body;Body	chr6:32097820-32098086	N_Shelf			NA			NA
cg00233307	0.918246	5.54996e-05	0.000532652	37	19	39109076	R	MAP4K1;EIF3K;MAP4K1	NM_007181;NM_013234;NM_001042600	TSS1500;TSS1500;TSS1500	chr19:39109432-39109862	N_Shore			NA	19:39108249-39110187	Promoter_Associated	NA
cg00233633	0.906996	0.000838341	0.00585803	37	7	29153560	F	CPVL;CPVL	NM_031311;NM_019029	Body;Body					TRUE			TRUE
cg00234095	-1.58728	1.39481e-07	2.34666e-06	37	17	39440474	F								TRUE			NA
cg00234467	0.405695	0.000831517	0.0058167	37	17	20220360	R				chr17:20223749-20225068	N_Shelf			NA			NA
cg00235460	1.05783	7.14627e-05	0.000667494	37	2	175867417	F	CHN1;CHN1	NM_001822;NM_001025201	Body;Body	chr2:175869574-175870289	N_Shelf			NA			NA
cg00235508	-0.723026	6.1821e-05	0.000586804	37	17	79439311	R								NA			TRUE
cg00235786	-0.777962	2.38591e-10	6.73204e-09	37	5	97903451	R								NA			NA
cg00236305	-1.51094	1.45592e-09	3.56123e-08	37	2	1796076	R	MYT1L	NM_015025	Body					NA			TRUE
cg00237010	1.81511	8.36616e-11	2.56253e-09	37	12	772861	F	NINJ2	NM_016533	TSS200					TRUE			NA
cg00237520	-0.831244	7.45606e-07	1.08373e-05	37	5	177764237	R	COL23A1	NM_173465	Body	chr5:177764136-177764341	Island			NA			NA
cg00238283	-1.88591	1.23406e-08	2.54744e-07	37	7	158059790	F	PTPRN2;PTPRN2;PTPRN2	NM_002847;NM_130842;NM_130843	Body;Body;Body	chr7:158060894-158061100	N_Shore			NA			NA
cg00238570	1.97261	4.20108e-11	1.35851e-09	37	2	110871644	R	MALL	NM_005434	Body	chr2:110872945-110873587	N_Shore			NA			NA
cg00238662	2.00085	4.34312e-14	2.39862e-12	37	6	43235803	F	TTBK1	NM_032538	Body	chr6:43237260-43237643	N_Shore			NA			TRUE
cg00238848	-0.899258	0.00024839	0.00201389	37	11	72408252	R	ARAP1;ARAP1;ARAP1	NM_001135190;NM_015242;NM_001040118	Body;Body;Body	chr11:72408050-72408513	Island			TRUE			TRUE
cg00238958	-0.700921	4.68642e-05	0.000458252	37	6	28480984	R	GPX6	NM_182701	Body					NA			NA
cg00239394	-0.417247	0.000742847	0.00527038	37	2	85109389	F	C2orf89	NM_001080824	TSS1500	chr2:85107731-85108430	S_Shore			NA	2:85108830-85109675	Promoter_Associated	TRUE
cg00239915	2.012	7.51898e-10	1.93957e-08	37	7	157809596	R	PTPRN2;PTPRN2;PTPRN2	NM_002847;NM_130842;NM_130843	Body;Body;Body				RDMR	TRUE			NA
cg00239988	-0.56058	0.000709016	0.00505931	37	5	134606261	R								TRUE			NA
cg00240178	1.96675	6.07283e-11	1.90751e-09	37	6	74232108	R	EEF1A1	NM_001402	TSS1500	chr6:74233268-74233546	N_Shore			NA	6:74231909-74232118	Promoter_Associated	NA
cg00240205	-1.06654	1.51666e-07	2.53421e-06	37	2	69450115	F	ANTXR1	NM_032208	Body					TRUE			NA
cg00240767	0.447919	0.000422059	0.00321703	37	16	28564522	R	CCDC101	NM_138414	TSS1500	chr16:28565145-28565753	N_Shore			NA	16:28564406-28564558	Unclassified_Cell_type_specific	NA
cg00240860	-0.681278	0.000144359	0.00124765	37	16	15702420	F	KIAA0430	NM_014647	Body					TRUE			NA
cg00240880	-0.791258	1.98851e-05	0.000212361	37	20	43343233	F	WISP2	NM_003881	TSS1500					TRUE			TRUE
cg00241076	0.745721	2.11078e-06	2.79857e-05	37	16	27120945	F				chr16:27121011-27121241	N_Shore			NA	16:27120809-27122335	Unclassified	NA
cg00241273	-1.8152	4.23566e-09	9.51901e-08	37	13	107172856	F	EFNB2	NM_004093	Body					TRUE	13:107172562-107173111	Unclassified_Cell_type_specific	NA
cg00241281	-0.727599	7.96645e-08	1.40669e-06	37	14	105779794	R	PACS2;PACS2	NM_015197;NM_001100913	TSS1500;TSS1500	chr14:105780339-105782027	N_Shore			NA			NA
cg00241663	2.46915	3.90111e-10	1.0618e-08	37	3	128209772	R	GATA2	NM_032638	5'UTR	chr3:128205495-128212274	Island		CDMR	NA			TRUE
cg00242020	0.59289	0.000916126	0.00632705	37	8	37797632	R	GOT1L1;GOT1L1	NM_152413;NM_152413	5'UTR;1stExon					NA			NA
cg00242358	1.30135	6.942e-12	2.58939e-10	37	3	47619041	R	CSPG5	NM_006574	Body	chr3:47619112-47621131	N_Shore			NA			TRUE
cg00243187	2.46027	1.37376e-17	1.47427e-15	37	11	128746214	R								NA			NA
cg00243272	2.6269	2.00802e-19	3.11005e-17	37	22	50720468	F	PLXNB2	NM_012401	Body	chr22:50718979-50721884	Island			NA			NA
cg00243281	1.32348	9.29787e-10	2.35817e-08	37	11	2597838	R	KCNQ1;KCNQ1	NM_000218;NM_181798	Body;Body	chr11:2596378-2596607	S_Shore			NA			NA
cg00244040	1.57377	8.35169e-08	1.46861e-06	37	14	61788914	F	PRKCH	NM_006255	1stExon	chr14:61787880-61789467	Island		DMR	NA	14:61787646-61789040	Promoter_Associated	NA
cg00244111	-1.59099	2.04151e-11	6.98729e-10	37	3	149086884	R	TM4SF1	NM_014220	3'UTR			low-CpG:150569574-150569578		NA			NA
cg00245032	-0.741821	1.6114e-06	2.18731e-05	37	2	32502380	F	YIPF4	NM_032312	TSS1500	chr2:32502965-32503471	N_Shore			NA	2:32502235-32503923	Promoter_Associated	NA
cg00245075	2.62113	7.06915e-20	1.21178e-17	37	12	51756242	R	GALNT6	NM_007210	Body					TRUE			NA
cg00245778	-0.239547	0.000462415	0.00348464	37	1	179064635	R	TOR3A	NM_022371	3'UTR					NA			NA
cg00245854	0.736909	2.90678e-05	0.000298965	37	5	150138895	F	DCTN4;DCTN4;DCTN4	NM_016221;NM_001135644;NM_001135643	TSS1500;TSS1500;TSS1500	chr5:150138371-150138714	S_Shore			NA	5:150137824-150139000	Promoter_Associated	NA
cg00245885	0.407046	0.000467457	0.00351696	37	5	134680139	F	H2AFY;H2AFY;H2AFY;H2AFY	NM_004893;NM_001040158;NM_138610;NM_138609	Body;Body;Body;Body					TRUE			NA
cg00246386	-1.00837	0.000278448	0.00222621	37	20	2674548	F	EBF4	NM_001110514	Body	chr20:2672904-2674698	Island		DMR	NA			NA
cg00247426	1.19444	7.3781e-10	1.90673e-08	37	1	19051735	R	PAX7;PAX7;PAX7	NM_013945;NM_002584;NM_001135254	Body;Body;Body					TRUE			TRUE
cg00247571	1.86957	6.07244e-10	1.59272e-08	37	13	50707065	R				chr13:50707585-50708019	N_Shore		RDMR	NA	13:50706355-50707222	Unclassified	NA
cg00247631	0.920109	0.000226843	0.00185807	37	6	35479350	R	TULP1	NM_003322	Body	chr6:35479388-35479678	N_Shore			TRUE			NA
cg00248242	-1.21669	6.53008e-08	1.17266e-06	37	2	240867059	R				chr2:240868278-240868590	N_Shore			NA	2:240866747-240867401	Unclassified_Cell_type_specific	NA
cg00248454	-0.643916	2.42006e-06	3.16764e-05	37	1	6505421	R	ESPN	NM_031475	Body	chr1:6507207-6509186	N_Shore			NA	1:6504121-6505730	Unclassified	NA
cg00249264	1.04503	1.35346e-10	4.00368e-09	37	16	55542747	F	LPCAT2	NM_017839	TSS200	chr16:55542920-55543274	N_Shore			NA			NA
cg00249503	1.26345	8.95906e-11	2.7304e-09	37	17	76565078	F	DNAH17	NM_173628	Body					NA			NA
cg00250123	0.701902	0.00106856	0.00723585	37	4	69048335	F	LOC100130017	NR_015446	Body	chr4:69048062-69048437	Island			NA			NA
cg00250483	1.08396	1.45956e-07	2.44702e-06	37	1	163172914	R	RGS5	NM_003617	TSS200					TRUE			NA
cg00250525	1.22225	1.81393e-14	1.07472e-12	37	8	37719489	F	RAB11FIP1;RAB11FIP1;RAB11FIP1	NM_001002814;NM_001002233;NM_025151	3'UTR;3'UTR;3'UTR					NA			NA
cg00251405	-0.608387	0.000238707	0.00194361	37	1	33219246	R	KIAA1522	NM_020888	Body	chr1:33219427-33220028	N_Shore			NA	1:33219131-33220885	Promoter_Associated	NA
cg00252408	4.54929	4.22875e-27	3.69272e-24	37	1	98389381	R				chr1:98386189-98386724	S_Shelf			NA			NA
cg00252418	0.82446	5.63861e-05	0.000540284	37	7	154540325	F	DPP6;DPP6;DPP6	NM_001936;NM_130797;NM_001039350	Body;Body;Body	chr7:154542059-154542348	N_Shore			NA			NA
cg00253182	1.64061	7.79737e-10	2.00504e-08	37	9	2619314	R	FLJ35024	NR_015375	Body	chr9:2621308-2623685	N_Shore			NA			NA
cg00253228	-0.982549	4.51363e-05	0.000443248	37	8	145025610	R	PLEC1;PLEC1;PLEC1;PLEC1	NM_000445;NM_201378;NM_201379;NM_201380	Body;Body;Body;TSS1500	chr8:145024449-145025179	S_Shore		RDMR	NA			NA
cg00253269	0.80833	4.908e-05	0.000477389	37	17	7965013	R								TRUE			NA
cg00253564	0.550484	0.000115216	0.00102287	37	1	6552403	F	PLEKHG5;PLEKHG5;PLEKHG5	NM_198681;NM_001042663;NM_020631	Body;Body;TSS1500	chr1:6550083-6551115	S_Shore			NA			NA
cg00253658	1.22567	1.60074e-05	0.000174911	37	16	54210496	R								NA			NA
cg00253681	1.186	1.23592e-05	0.000138636	37	12	14996583	F	ART4	NM_021071	TSS200					NA			NA
cg00255368	0.288509	0.000330343	0.00259227	37	1	217310887	R	ESRRG	NM_001134285	5'UTR	chr1:217310749-217311178	Island			NA			NA
cg00255732	0.961432	6.77833e-06	8.0625e-05	37	2	242147702	R	ANO7	NM_001001891	Body	chr2:242148678-242149079	N_Shore			NA			NA
cg00255752	-1.73772	6.89659e-12	2.57362e-10	37	16	12005841	F	GSPT1;GSPT1;GSPT1	NM_001130006;NM_002094;NM_001130007	Body;Body;5'UTR	chr16:12008880-12010114	N_Shelf			NA			NA
cg00255882	1.01719	0.0014102	0.00920755	37	2	128569347	F	WDR33;WDR33;WDR33	NM_001006623;NM_018383;NM_001006622	TSS1500;TSS1500;TSS1500	chr2:128568321-128569064	S_Shore			NA	2:128567836-128569667	Promoter_Associated	NA
cg00255919	2.74852	9.72589e-13	4.21897e-11	37	5	131827918	F	IRF1	NM_002198	TSS1500	chr5:131825842-131826935	S_Shore		RDMR	NA	5:131827803-131828004	Unclassified_Cell_type_specific	NA
cg00256046	-1.2132	3.83694e-06	4.81156e-05	37	1	217306763	R	ESRRG	NM_001134285	5'UTR	chr1:217307744-217309179	N_Shore			NA			NA
cg00256155	5.73144	1.41368e-32	5.33798e-29	37	1	47915647	R				chr1:47915639-47915952	Island			NA	1:47915461-47916210	Unclassified_Cell_type_specific	TRUE
cg00256928	1.32814	2.23911e-07	3.6163e-06	37	12	115175155	F				chr12:115173614-115174822	S_Shore			NA			NA
cg00257296	2.23016	6.97369e-21	1.49051e-18	37	12	120799373	R	MSI1	NM_002442	Body	chr12:120799372-120799912	Island			TRUE			TRUE
cg00257455	1.40514	3.10329e-09	7.15517e-08	37	1	65530538	R				chr1:65532161-65533212	N_Shore			NA			NA
cg00257893	0.633613	0.00103137	0.00701782	37	6	138820840	R	NHSL1;NHSL1	NM_001144060;NM_020464	TSS1500;Body					NA			NA
cg00258316	-0.531899	0.000336321	0.0026333	37	1	8194341	R								TRUE			TRUE
cg00258445	-1.13315	3.79305e-06	4.76194e-05	37	17	52423858	F								TRUE			NA
cg00259584	0.465183	0.00107021	0.00724556	37	2	106986308	R								NA			NA
cg00260012	-1.69129	2.04734e-13	1.00206e-11	37	2	31031702	F	CAPN13	NM_144575	TSS1500					NA			NA
cg00260201	1.09312	0.000682695	0.00489539	37	17	46029581	F	PRR15L	NM_024320	3'UTR					NA			NA
cg00261082	1.28039	1.86911e-10	5.38413e-09	37	2	209563429	F								TRUE			NA
cg00261832	-0.681175	0.000655027	0.00472224	37	6	132270033	R	CTGF	NM_001901	3'UTR	chr6:132271356-132271658	N_Shore		RDMR	NA			NA
cg00261900	0.881209	9.08977e-06	0.00010498	37	6	44194802	R	SLC29A1;SLC29A1;SLC29A1;SLC29A1;SLC29A1	NM_001078174;NM_001078176;NM_001078175;NM_004955;NM_001078177	5'UTR;5'UTR;5'UTR;5'UTR;5'UTR	chr6:44191278-44191872	S_Shelf	low-CpG:44302716-44302995		NA	6:44194695-44194838	Unclassified_Cell_type_specific	TRUE
cg00262030	0.557367	1.46319e-05	0.000161369	37	8	61837048	R				chr8:61834699-61835871	S_Shore		RDMR	NA			NA
cg00262446	-1.04655	0.000143741	0.00124304	37	4	101439228	R	EMCN;EMCN;EMCN;EMCN	NM_016242;NM_001159694;NM_001159694;NM_016242	5'UTR;5'UTR;1stExon;1stExon					NA			NA
cg00262621	-0.904722	0.000984633	0.0067389	37	1	1566374	R	MMP23B	NM_006983	TSS1500	chr1:1564421-1570006	Island			TRUE			NA
cg00263146	1.07814	1.49713e-05	0.00016472	37	5	17221971	F	BASP1	NM_006317	5'UTR	chr5:17217788-17219021	S_Shelf			NA			NA
cg00263248	1.50744	2.04217e-05	0.000217539	37	14	98444151	F	C14orf64	NR_015430	Body					NA	14:98444107-98445301	Unclassified_Cell_type_specific	NA
cg00263700	-3.85865	1.17509e-21	2.95624e-19	37	16	968257	R	LMF1	NM_022773	Body	chr16:967241-967619	S_Shore			NA			NA
cg00264129	1.68027	1.1834e-08	2.45246e-07	37	5	139725093	R	HBEGF	NM_001945	Body	chr5:139725530-139726234	N_Shore		CDMR	TRUE	5:139724627-139727187	Promoter_Associated	NA
cg00264133	0.980341	5.63447e-05	0.000539925	37	17	73154796	F				chr17:73149830-73150885	S_Shelf			NA			NA
cg00264419	3.08397	7.77846e-17	7.19294e-15	37	8	22922124	R	TNFRSF10B;TNFRSF10B;TNFRSF10B	NM_147187;NR_027140;NM_003842	Body;Body;Body	chr8:22925655-22926912	N_Shelf			NA			NA
cg00264500	0.786548	1.10165e-07	1.89169e-06	37	20	62186943	F	C20orf195	NM_024059	5'UTR	chr20:62187125-62187896	N_Shore			NA			NA
cg00264754	-1.14352	6.25985e-05	0.000593204	37	11	40136810	R	LRRC4C	NM_020929	Body					NA			NA
cg00264958	-0.797378	1.02019e-06	1.44452e-05	37	17	48023189	R								TRUE			NA
cg00264994	-0.737791	0.0005561	0.0040935	37	17	47991806	F				chr17:47987524-47988101	S_Shelf			NA			TRUE
cg00267286	1.3698	1.81057e-11	6.24984e-10	37	10	16564187	R	C1QL3	NM_001010908	TSS200	chr10:16561604-16563822	S_Shore			NA			NA
cg00268644	-3.04113	3.86646e-33	1.69544e-29	37	20	6105569	R	FERMT1	NM_017671	TSS1500	chr20:6103436-6103970	S_Shore			NA			NA
cg00269659	2.52365	1.09862e-17	1.20468e-15	37	16	27729685	F	KIAA0556	NM_015202	Body					TRUE			NA
cg00270093	0.575458	0.000440744	0.00334053	37	19	50027944	F	FCGRT;FCGRT	NM_001136019;NM_004107	Body;Body	chr19:50027777-50028011	Island			NA	19:50027904-50028014	Unclassified_Cell_type_specific	NA
cg00271204	0.896728	3.20219e-12	1.26525e-10	37	5	139142898	R				chr5:139143965-139144177	N_Shore			NA			NA
cg00271964	-0.387045	9.52129e-06	0.000109474	37	2	144693693	F				chr2:144694666-144695180	N_Shore			TRUE			NA
cg00272795	-1.49012	0.000140806	0.00122054	37	21	46220161	F	UBE2G2;UBE2G2	NM_182688;NM_003343	5'UTR;Body	chr21:46221388-46222456	N_Shore			NA			NA
cg00273124	1.20019	4.20766e-06	5.23124e-05	37	5	177581512	F	NHP2;NHP2	NM_017838;NM_001034833	TSS1500;TSS1500	chr5:177580534-177581126	S_Shore			NA			NA
cg00273198	-1.96356	6.85159e-14	3.65243e-12	37	9	139069298	R				chr9:139069755-139070076	N_Shore			NA			NA
cg00273657	0.921532	7.08121e-05	0.000662266	37	10	127262562	R	LOC100169752	NR_023362	TSS1500					NA			NA
cg00274399	-0.247928	0.00109183	0.00737027	37	13	22245420	R	FGF9;FGF9	NM_002010;NM_002010	5'UTR;1stExon	chr13:22243259-22245362	S_Shore			NA			NA
cg00274909	-0.710323	0.000590286	0.00431168	37	11	131799642	R	NTM;NTM;NTM;NTM	NM_001144059;NM_001048209;NM_001144058;NM_016522	Body;Body;Body;Body					NA			NA
cg00275103	-0.582658	8.66965e-06	0.000100601	37	16	87102642	F								TRUE			NA
cg00275362	1.03426	0.000235962	0.00192368	37	19	20277051	F	ZNF486	NM_052852	TSS1500					NA			NA
cg00275449	1.33012	5.99744e-08	1.08398e-06	37	3	195162127	R	ACAP2	NM_012287	Body	chr3:195162891-195164119	N_Shore			NA	3:195162026-195162283	Promoter_Associated_Cell_type_specific	NA
cg00275503	-1.50264	4.99349e-10	1.33248e-08	37	6	133908606	R								TRUE			NA
cg00277233	-1.48988	6.39119e-20	1.10814e-17	37	4	54229634	F	SCFD2	NM_152540	Body	chr4:54231708-54232320	N_Shelf			NA			NA
cg00277714	2.69198	2.16841e-16	1.84572e-14	37	13	30459305	F								TRUE	13:30459242-30459342	Unclassified_Cell_type_specific	NA
cg00277753	-1.73736	4.74833e-08	8.76909e-07	37	10	134918927	F	GPR123	NM_001083909	Body	chr10:134918755-134918975	Island			NA			NA
cg00278984	-1.45299	2.00874e-08	3.97579e-07	37	6	29203786	F								TRUE			NA
cg00279406	1.4096	4.38711e-09	9.8312e-08	37	1	226924739	R	ITPKB	NM_002221	Body	chr1:226924560-226926553	Island			NA			NA
cg00279557	1.36678	1.44478e-08	2.94079e-07	37	16	3064850	R	CLDN6	NM_021195	3'UTR	chr16:3063679-3063981	S_Shore			NA			NA
cg00279700	-0.551951	2.039e-07	3.32219e-06	37	1	226734755	R				chr1:226736354-226737412	N_Shore			NA			NA
cg00280235	1.29517	6.33317e-06	7.5801e-05	37	7	107797076	F	NRCAM;NRCAM;NRCAM;NRCAM	NM_001037133;NM_001037133;NM_001037132;NM_005010	1stExon;5'UTR;Body;Body					NA			NA
cg00280270	-2.55994	8.58526e-25	4.16798e-22	37	22	21320131	F	AIFM3;AIFM3;AIFM3;AIFM3	NM_144704;NM_001018060;NM_001146288;NR_027464	5'UTR;5'UTR;TSS1500;TSS1500	chr22:21319178-21319912	S_Shore			NA	22:21318855-21320232	Unclassified_Cell_type_specific	NA
cg00280858	1.54009	4.45179e-06	5.50539e-05	37	7	157809235	F	PTPRN2;PTPRN2;PTPRN2	NM_002847;NM_130842;NM_130843	Body;Body;Body				RDMR	NA			NA
cg00281100	-0.591652	5.99591e-05	0.000571098	37	10	90041434	R	RNLS	NM_018363	Body					TRUE			NA
cg00282426	0.366918	0.000267362	0.00214806	37	9	136843224	R	VAV2;VAV2	NM_001134398;NM_003371	Body;Body	chr9:136844420-136844775	N_Shore			NA			NA
cg00282953	0.863137	4.71236e-06	5.79564e-05	37	5	175793541	F	ARL10	NM_173664	Body	chr5:175792355-175793505	S_Shore			NA			TRUE
cg00283030	0.600623	3.54235e-06	4.47628e-05	37	2	132056444	F	LOC440910	NR_030728	Body	chr2:132056862-132057199	N_Shore			NA			NA
cg00283344	0.228613	0.00144109	0.00938073	37	2	86847539	R	RNF103	NM_005667	Body	chr2:86850042-86851178	N_Shelf			NA			NA
cg00283662	0.868091	5.4237e-09	1.19648e-07	37	19	46178101	R	MIR642;GIPR	NR_030372;NM_000164	TSS200;Body	chr19:46180162-46180769	N_Shelf			NA			NA
cg00283857	-1.06133	3.52967e-09	8.05177e-08	37	6	158018184	F	ZDHHC14;ZDHHC14	NM_153746;NM_024630	Body;Body	chr6:158013812-158014256	S_Shelf			TRUE			NA
cg00283986	-0.852513	6.36404e-05	0.000602321	37	2	20875062	F				chr2:20870006-20871280	S_Shelf			TRUE	2:20874907-20875458	Unclassified_Cell_type_specific	TRUE
cg00284153	2.09709	3.05957e-14	1.73872e-12	37	10	135171713	R	C10orf125;C10orf125	NM_198472;NM_001098483	TSS200;TSS200	chr10:135170645-135171954	Island			NA	10:135170363-135172284	Promoter_Associated	NA
cg00284173	1.45445	1.03812e-06	1.46778e-05	37	2	24273093	R	FKBP1B;FKBP1B	NM_054033;NM_004116	Body;Body	chr2:24272582-24273313	Island			NA	2:24272281-24273317	Unclassified_Cell_type_specific	NA
cg00284386	1.04817	1.49558e-08	3.03434e-07	37	8	1786207	R	ARHGEF10	NM_014629	5'UTR					NA			NA
cg00285317	0.971289	3.01037e-06	3.86415e-05	37	2	238406108	R	MLPH;MLPH	NM_001042467;NM_024101	Body;Body					TRUE			NA
cg00285343	1.18834	0.0010272	0.00699266	37	7	41733356	F	LOC285954;LOC285954;INHBA	NR_027119;NR_027118;NM_002192	TSS200;TSS200;Body					NA	7:41732612-41733461	Unclassified	NA
cg00285394	1.44913	2.58607e-09	6.0405e-08	37	8	126011954	F	SQLE	NM_003129	Body	chr8:126010436-126011194	S_Shore		CDMR	NA	8:126009738-126012167	Promoter_Associated	NA
cg00286102	3.33126	4.26272e-11	1.37648e-09	37	20	61047376	F	GATA5	NM_080473	Body	chr20:61049361-61051897	N_Shore			NA			NA
cg00286125	-0.988121	8.16779e-06	9.53963e-05	37	19	36246906	F	HSPB6	NM_144617	Body	chr19:36246328-36247982	Island			NA	19:36246363-36247460	Unclassified_Cell_type_specific	NA
cg00286188	-0.693235	0.000140446	0.00121793	37	2	33493596	F	LTBP1;LTBP1;LTBP1;LTBP1;LTBP1	NM_000627;NM_206943;NM_001166265;NM_001166266;NM_001166264	Body;Body;Body;Body;Body					TRUE			NA
cg00286773	-0.656752	0.000230381	0.00188368	37	11	12207449	R	MICAL2	NM_014632	Body					TRUE			NA
cg00287413	-1.07361	2.42555e-07	3.8874e-06	37	20	52788779	R	CYP24A1;CYP24A1	NM_001128915;NM_000782	Body;Body	chr20:52789252-52790986	N_Shore			NA			NA
cg00287717	-0.353092	0.00130041	0.00857849	37	10	52390780	R								NA			NA
cg00288376	-0.999905	0.000461026	0.0034752	37	15	82313720	R								TRUE			NA
cg00288463	0.93669	1.7419e-08	3.48982e-07	37	2	223382426	F	SGPP2	NM_152386	Body					TRUE			NA
cg00288763	2.67548	3.2017e-18	3.88476e-16	37	4	154679462	F	RNF175	NM_173662	Body	chr4:154680774-154681377	N_Shore		CDMR	NA			NA
cg00288844	1.47817	7.442e-11	2.30456e-09	37	16	11835360	R	TXNDC11	NM_015914	Body	chr16:11836073-11837092	N_Shore		RDMR	NA	16:11835199-11835496	Promoter_Associated_Cell_type_specific	NA
cg00289503	0.921679	0.000823784	0.00576844	37	20	61470028	R	COL9A3	NM_001853	Body	chr20:61471903-61472256	N_Shore			NA			NA
cg00290023	1.59837	9.52966e-13	4.1387e-11	37	5	174962968	F								TRUE			NA
cg00290340	0.898392	1.44226e-05	0.000159337	37	15	65625267	R	IGDCC3	NM_004884	Body					NA			NA
cg00290607	1.35498	0.000152598	0.0013095	37	11	67383545	R				chr11:67383537-67383809	Island			TRUE	11:67382913-67383979	Promoter_Associated	NA
cg00290758	-1.3711	2.97136e-07	4.6805e-06	37	10	121171859	R	GRK5	NM_005308	Body					NA			TRUE
cg00290994	-1.01303	2.34159e-05	0.000246175	37	1	41848739	R				chr1:41847264-41849204	Island		DMR	NA			NA
cg00292513	-0.876428	1.47084e-06	2.01206e-05	37	12	248296	F	IQSEC3;IQSEC3	NM_001170738;NM_015232	Body;Body	chr12:247455-248501	Island			NA			NA
cg00292540	-0.991833	3.44399e-10	9.4641e-09	37	3	149251606	F	WWTR1;WWTR1;WWTR1	NM_015472;NM_001168278;NM_001168280	Body;Body;Body					TRUE			NA
cg00292947	-0.579597	4.622e-05	0.000452582	37	15	78499137	R	ACSBG1	NM_015162	Body					TRUE			NA
cg00293381	0.558521	6.40478e-07	9.43809e-06	37	12	121177413	R	ACADS	NM_000017	3'UTR	chr12:121177115-121177341	S_Shore			NA			NA
cg00293599	-0.606357	6.2223e-05	0.000590153	37	6	34505610	R	SPDEF	NM_012391	3'UTR					NA			NA
cg00293644	1.42295	0.00146334	0.00950173	37	1	32674341	R	DCDC2B	NM_001099434	TSS1500	chr1:32670569-32671885	S_Shelf			NA			NA
cg00293660	3.93742	1.34689e-23	5.02531e-21	37	6	55103999	R	HCRTR2	NM_001526	Body					NA			NA
cg00294109	2.74763	1.1917e-14	7.29372e-13	37	3	3219781	R	CRBN	NM_016302	Body	chr3:3221083-3221617	N_Shore			NA			NA
cg00294267	1.46197	6.1954e-09	1.35216e-07	37	16	49572227	R	ZNF423	NM_015069	Body					NA			NA
cg00294382	0.939292	3.34506e-05	0.000339148	37	12	56732721	R	IL23A;IL23A	NM_016584;NM_016584	5'UTR;1stExon					TRUE	12:56732294-56732852	Promoter_Associated	NA
cg00294940	1.56211	3.43507e-19	5.08655e-17	37	1	48687524	F	SLC5A9;SLC5A9	NM_001135181;NM_001011547	TSS1500;TSS1500					NA			NA
cg00294956	-0.80425	3.69173e-05	0.000370686	37	5	13921996	R	DNAH5	NM_001369	Body					TRUE			NA
cg00295426	0.495233	0.00114282	0.00766764	37	7	2208606	F	MAD1L1;MAD1L1;MAD1L1	NM_003550;NM_001013837;NM_001013836	Body;Body;Body					NA			NA
cg00295744	2.56226	2.83872e-17	2.86262e-15	37	1	151689985	F	TNRC4	NM_007185	TSS1500					NA	1:151689852-151690035	Unclassified_Cell_type_specific	TRUE
cg00295853	3.3247	4.89519e-23	1.62167e-20	37	1	87245071	F								TRUE			NA
cg00296038	1.46734	4.61089e-15	3.04557e-13	37	3	11624533	R	VGLL4;VGLL4;VGLL4	NM_014667;NM_001128219;NM_001128220	Body;Body;TSS1500					TRUE			NA
cg00296079	-0.264111	0.000801373	0.00563289	37	1	160990978	F	F11R;F11R	NM_016946;NM_016946	1stExon;5'UTR	chr1:160990718-160991225	Island	high-CpG:159257525-159257606		TRUE	1:160990446-160991562	Promoter_Associated	TRUE
cg00296458	0.657626	4.02834e-08	7.54154e-07	37	1	16070763	R	TMEM82	NM_001013641	Body	chr1:16070628-16070853	Island			NA	1:16070731-16070854	Unclassified_Cell_type_specific	NA
cg00296903	-0.321415	0.000533104	0.0039461	37	9	90620271	R				chr9:90621588-90622101	N_Shore			NA			NA
cg00297075	1.25121	2.56831e-07	4.09671e-06	37	9	79627672	R				chr9:79628910-79629393	N_Shore			NA			NA
cg00297600	1.20031	4.42807e-07	6.7365e-06	37	8	35401670	R	UNC5D	NM_080872	Body					TRUE			NA
cg00297843	0.519862	0.000261012	0.00210338	37	4	1767501	F				chr4:1768563-1769074	N_Shore			NA			NA
cg00297912	2.66097	1.89986e-16	1.63488e-14	37	6	155636825	R	TFB1M	NM_016020	TSS1500	chr6:155635218-155635882	S_Shore			NA			NA
cg00298357	0.928587	1.77082e-10	5.12781e-09	37	5	148758791	F	IL17B;IL17B	NM_014443;NM_014443	5'UTR;1stExon					NA			NA
cg00298399	0.90225	1.24616e-05	0.000139659	37	1	17697934	R	PADI6	NM_207421	TSS1500					TRUE			NA
cg00298405	0.612933	0.000680336	0.00488131	37	22	46835192	R	CELSR1	NM_014246	Body	chr22:46834984-46835285	Island			NA			NA
cg00298595	0.332323	1.13633e-05	0.000128565	37	17	18909456	R	SLC5A10;SLC5A10;FAM83G	NM_001042450;NM_152351;NM_001039999	Body;Body;TSS1500	chr17:18906909-18908243	S_Shore			NA			NA
cg00299105	-0.529033	6.70896e-05	0.000631332	37	11	113243817	R								TRUE			NA
cg00299396	1.87897	1.16389e-13	5.95608e-12	37	11	115483607	F								TRUE			NA
cg00299603	-2.84261	6.48004e-20	1.12212e-17	37	5	64494334	R	ADAMTS6	NM_197941	Body					TRUE			NA
cg00299767	0.568569	0.000874904	0.00607766	37	14	21560917	R	ZNF219;ZNF219;ZNF219	NM_001101672;NM_016423;NM_001102454	Body;Body;Body	chr14:21558547-21561443	Island			NA	14:21559917-21561257	Unclassified	NA
cg00299820	0.767322	0.00105218	0.00713875	37	1	11943154	R								TRUE	1:11943111-11943179	Unclassified_Cell_type_specific	TRUE
cg00300298	1.1375	7.43949e-06	8.76481e-05	37	20	30308956	F	BCL2L1;BCL2L1	NM_138578;NM_001191	Body;Body	chr20:30310503-30310707	N_Shore			TRUE	20:30308686-30309043	Promoter_Associated	NA
cg00300303	-1.04897	5.96406e-07	8.83814e-06	37	1	1067223	R								NA			NA
cg00300627	-0.931075	0.000247613	0.00200831	37	9	132646360	R				chr9:132648043-132648284	N_Shore			NA			NA
cg00300637	1.08966	0.000111164	0.000991018	37	5	319433	R	AHRR	NM_020731	Body	chr5:320788-323010	N_Shore			NA			NA
cg00300672	-1.52657	1.9312e-06	2.58018e-05	37	2	125077436	R	CNTNAP5	NM_130773	Body					TRUE			NA
cg00300794	-1.16773	9.78182e-09	2.06089e-07	37	16	1231723	R	CACNA1H;CACNA1H	NM_021098;NM_001005407	Body;Body	chr16:1230112-1230317	S_Shore			NA			NA
cg00300822	0.67042	6.95408e-05	0.000651872	37	16	30075511	R	ALDOA;ALDOA;ALDOA	NM_184043;NM_001127617;NM_000034	TSS200;TSS1500;5'UTR	chr16:30076310-30077872	N_Shore			NA	16:30075276-30075636	Promoter_Associated	NA
cg00300969	-0.834855	1.0839e-05	0.000123142	37	20	31366486	F	DNMT3B;DNMT3B;DNMT3B;DNMT3B	NM_175849;NM_006892;NM_175850;NM_175848	5'UTR;5'UTR;TSS1500;5'UTR					NA	20:31365642-31367246	Unclassified	TRUE
cg00301033	0.54394	4.35116e-06	5.3937e-05	37	11	43390036	R	TTC17	NM_018259	Body					TRUE			NA
cg00302587	2.08903	1.78694e-12	7.40046e-11	37	10	51576241	F	NCOA4;NCOA4;NCOA4;NCOA4;NCOA4	NM_001145262;NM_005437;NM_001145263;NM_001145261;NM_001145260	TSS200;5'UTR;5'UTR;Body;Body	chr10:51572198-51572620	S_Shelf			TRUE			NA
cg00303745	2.50055	2.12726e-14	1.24642e-12	37	7	50133212	F	ZPBP;ZPBP	NM_007009;NM_001159878	TSS1500;TSS1500	chr7:50132572-50132921	S_Shore		CDMR	NA	7:50132066-50133331	Promoter_Associated_Cell_type_specific	NA
cg00303919	-0.552745	1.84504e-08	3.67605e-07	37	1	120336983	R	REG4;REG4	NM_001159352;NM_032044	3'UTR;3'UTR					TRUE			NA
cg00304185	0.807931	0.000190768	0.0015948	37	16	1033074	R	SOX8	NM_014587	Body	chr16:1029878-1035327	Island			NA			NA
cg00305193	1.30887	4.77427e-13	2.18933e-11	37	1	26158583	R	FAM54B;FAM54B;FAM54B;FAM54B	NM_001099627;NM_001099625;NM_001099626;NM_019557	3'UTR;3'UTR;3'UTR;3'UTR					NA			NA
cg00305281	0.673402	0.00011167	0.000995029	37	22	42316176	F				chr22:42315502-42316409	Island			NA	22:42315273-42316279	Unclassified	TRUE
cg00305740	1.41885	3.22257e-06	4.11015e-05	37	7	73392697	R								NA	7:73392672-73392699	Unclassified_Cell_type_specific	NA
cg00305993	0.805636	1.88051e-07	3.08442e-06	37	15	76116615	R								TRUE			NA
cg00305996	2.4087	6.50784e-19	9.06084e-17	37	2	227655319	R	IRS1	NM_005544	3'UTR	chr2:227655903-227656647	N_Shore		CDMR	NA			NA
cg00306090	0.728221	7.23033e-05	0.00067465	37	20	2820742	R	VPS16;FAM113A;VPS16	NM_022575;NM_022760;NM_080413	TSS1500;5'UTR;TSS1500	chr20:2820509-2821911	Island			NA			NA
cg00306284	0.657622	4.72885e-06	5.81382e-05	37	17	18855313	F	SLC5A10;SLC5A10	NM_152351;NM_001042450	TSS200;TSS200					NA	17:18854730-18855479	Unclassified_Cell_type_specific	NA
cg00306523	1.57383	1.81255e-05	0.000195422	37	8	94257369	R								TRUE			NA
cg00306721	1.08035	2.22956e-05	0.000235489	37	11	62477480	F	BSCL2	NM_001130702	TSS1500	chr11:62476770-62477481	Island			TRUE	11:62476291-62477634	Promoter_Associated	TRUE
cg00306851	1.00799	1.44932e-05	0.000160004	37	15	39742079	F								TRUE			NA
cg00306951	0.628921	0.000949245	0.00652836	37	2	221831539	R								TRUE			TRUE
cg00307066	0.480994	0.000989752	0.00676973	37	4	41880465	R				chr4:41880224-41880500	Island		RDMR	NA			NA
cg00307818	0.5826	4.2551e-05	0.00042034	37	1	55463592	R	BSND	NM_057176	TSS1500	chr1:55462688-55463010	S_Shore			NA			NA
cg00308618	1.26315	8.1267e-12	2.99404e-10	37	2	152831903	R	CACNB4;CACNB4;CACNB4;CACNB4	NM_000726;NM_001145798;NM_001005747;NM_001005746	Body;Body;TSS1500;Body					NA			NA
cg00308665	-0.667152	0.000352516	0.00274461	37	13	47469654	F	HTR2A;HTR2A	NM_000621;NM_001165947	Body;Body					NA			NA
cg00308841	0.802563	5.04406e-07	7.58476e-06	37	5	90790737	F								TRUE			NA
cg00308914	-2.48084	1.36572e-14	8.26944e-13	37	5	17436715	F								TRUE			NA
cg00309133	0.924467	2.35983e-05	0.000247887	37	15	69452320	F	MIR548H4;GLCE	NR_031680;NM_015554	Body;TSS1500	chr15:69452451-69453939	N_Shore			NA	15:69452317-69453028	Promoter_Associated	NA
cg00310391	-1.32257	1.39942e-08	2.85572e-07	37	7	25218741	R	C7orf31	NM_138811	Body	chr7:25219408-25219962	N_Shore		CDMR	NA			NA
cg00310404	1.05091	0.000105047	0.000942291	37	1	27673775	F	SYTL1	NM_032872	Body	chr1:27675919-27678016	N_Shelf			NA			NA
cg00310412	0.609311	0.000132252	0.00115474	37	15	74724918	R	SEMA7A;SEMA7A;SEMA7A	NM_003612;NM_001146029;NM_001146030	Body;Body;5'UTR	chr15:74725323-74726487	N_Shore		CDMR	NA			NA
cg00310463	-1.22845	1.2672e-05	0.000141786	37	3	134371285	R	KY	NM_178554	TSS1500	chr3:134369464-134370242	S_Shore		RDMR	NA			TRUE
cg00311035	-0.649347	0.000178735	0.00150566	37	7	30176168	F	C7orf41	NM_152793	Body	chr7:30174230-30176169	Island		CDMR	NA	7:30176155-30176910	Promoter_Associated	NA
cg00311883	-0.836123	5.24862e-05	0.000506473	37	1	235099120	F								NA	1:235098574-235099525	Promoter_Associated	NA
cg00312809	-0.514535	0.000532021	0.00393943	37	1	2028213	R	PRKCZ;PRKCZ	NM_002744;NM_001033581	Body;5'UTR	chr1:2025205-2026225	S_Shore			NA	1:2028162-2028311	Unclassified_Cell_type_specific	NA
cg00313099	3.3542	5.03793e-17	4.81596e-15	37	16	64479729	R								TRUE			NA
cg00314003	1.22628	2.22866e-05	0.0002354	37	11	126873943	R				chr11:126873091-126873809	S_Shore			NA	11:126872725-126874374	Unclassified_Cell_type_specific	NA
cg00314018	0.690834	9.21418e-05	0.000838502	37	20	3776260	R	CDC25B;CDC25B;CDC25B	NM_021872;NM_021873;NM_004358	TSS200;TSS200;TSS200	chr20:3776198-3776419	Island			NA	20:3776034-3777551	Promoter_Associated	NA
cg00314029	1.75142	6.99274e-08	1.24778e-06	37	2	161348665	F	RBMS1;RBMS1	NM_002897;NM_016836	Body;Body	chr2:161349223-161350371	N_Shore		CDMR	NA			TRUE
cg00314115	1.11683	0.000274009	0.00219528	37	2	121280002	R				chr2:121279842-121280183	Island			NA			NA
cg00314368	-0.515109	0.000297792	0.00236455	37	8	122988442	R								TRUE			NA
cg00314622	1.19161	5.04673e-08	9.26812e-07	37	3	12199836	R	SYN2;TIMP4;SYN2	NM_133625;NM_003256;NM_003178	Body;Body;Body	chr3:12200183-12200532	N_Shore			TRUE			NA
cg00316312	-0.48415	0.000923866	0.00637392	37	10	134916087	R	GPR123	NM_001083909	Body	chr10:134918755-134918975	N_Shelf			NA			NA
cg00316341	1.63383	2.2221e-11	7.55088e-10	37	10	16898311	R	CUBN	NM_001081	Body					TRUE	10:16898199-16898407	Unclassified_Cell_type_specific	NA
cg00316478	-1.41409	5.64023e-08	1.02541e-06	37	16	89222027	F	ACSF3	NM_174917	3'UTR	chr16:89225687-89226195	N_Shelf		DMR	TRUE	16:89222024-89222269	Unclassified_Cell_type_specific	TRUE
cg00316759	1.30553	3.64107e-09	8.28687e-08	37	15	71407484	R	CT62;CT62	NM_001102658;NM_001102658	5'UTR;1stExon	chr15:71407656-71408498	N_Shore		RDMR	NA	15:71407052-71408285	Unclassified	NA
cg00316921	-0.791838	7.1678e-06	8.4773e-05	37	8	142984347	R				chr8:142984423-142984653	N_Shore			NA			NA
cg00317837	-2.18542	1.03132e-15	7.66635e-14	37	8	121048603	R	DEPDC6	NM_022783	Body					TRUE			NA
cg00317879	0.922737	0.000327246	0.00257064	37	11	68920611	F								TRUE			NA
cg00318436	0.43654	8.79639e-05	0.000804306	37	16	67696181	F	PARD6A;ACD;ACD;PARD6A;ACD	NM_016948;NM_022914;NM_001082487;NM_001037281;NM_001082486	Body;TSS1500;TSS1500;Body;TSS1500	chr16:67693451-67695560	S_Shore			NA			NA
cg00318897	0.901697	1.20228e-05	0.000135276	37	16	88268362	R				chr16:88268113-88268367	Island			NA			TRUE
cg00319312	-2.16319	2.53469e-06	3.30263e-05	37	1	203671140	R	ATP2B4;ATP2B4	NM_001001396;NM_001684	Body;Body					TRUE	1:203671101-203672050	Promoter_Associated	NA
cg00319595	0.934999	2.66583e-06	3.45782e-05	37	16	75300861	R	BCAR1;BCAR1;BCAR1;BCAR1;BCAR1	NM_001170718;NM_001170716;NM_001170715;NM_001170714;NM_001170720	TSS1500;TSS200;Body;TSS1500;TSS1500	chr16:75298976-75300186	S_Shore			NA			NA
cg00319661	-0.768608	2.51052e-05	0.000262076	37	5	2632178	F								NA			NA
cg00319686	0.937319	0.000158883	0.00135729	37	15	66680551	R	MAP2K1	NM_002755	Body	chr15:66678895-66679963	S_Shore			NA	15:66678648-66680556	Promoter_Associated	NA
cg00319692	1.17445	1.09027e-07	1.87325e-06	37	8	87111119	R	ATP6V0D2	NM_152565	TSS200					NA			NA
cg00319893	0.771003	0.00150774	0.0097495	37	1	181526714	F	CACNA1E	NM_000721	Body					TRUE			NA
cg00320094	1.07068	1.571e-08	3.17488e-07	37	1	68695183	F	GPR177;GPR177	NM_001002292;NM_024911	Body;Body	chr1:68696639-68697628	N_Shore			NA			NA
cg00320539	-0.687933	0.000168458	0.00142864	37	2	1983439	R	MYT1L	NM_015025	Body					NA			NA
cg00320980	-0.502756	0.000156934	0.00134238	37	10	134839587	F				chr10:134843465-134843776	N_Shelf		CDMR	NA			NA
cg00321007	2.49127	1.23092e-24	5.7632e-22	37	17	15340112	R	CDRT4	NM_173622	3'UTR					NA	17:15340060-15340443	Unclassified_Cell_type_specific	NA
cg00321074	1.56493	7.18151e-10	1.85958e-08	37	3	19990693	F	RAB5A	NM_004162	5'UTR	chr3:19988333-19989321	S_Shore			NA			NA
cg00321234	1.58301	7.31363e-07	1.06473e-05	37	4	141217605	R	SCOC	NM_032547	5'UTR				CDMR	NA			TRUE
cg00321555	-0.937966	7.89015e-05	0.000729259	37	10	6779875	F								TRUE			NA
cg00321638	-0.89127	1.78503e-06	2.40229e-05	37	3	186998894	R	MASP1;MASP1;MASP1	NM_139125;NM_001879;NM_001031849	Body;Body;Body					TRUE			TRUE
cg00321901	-0.850014	3.61937e-09	8.23915e-08	37	8	10512459	R	RP1L1;RP1L1	NM_178857;NM_178857	1stExon;5'UTR					NA			TRUE
cg00322262	1.25335	8.92958e-10	2.27126e-08	37	4	8085866	F	ABLIM2;ABLIM2;ABLIM2;ABLIM2;ABLIM2;ABLIM2;ABLIM2	NM_032432;NM_001130083;NM_001130087;NM_001130088;NM_001130084;NM_001130085;NM_001130086	Body;Body;Body;Body;Body;Body;Body	chr4:8087169-8087449	N_Shore			NA			NA
cg00322919	2.39885	3.40181e-16	2.78737e-14	37	10	17172000	R	CUBN	NM_001081	TSS200					NA			NA
cg00323313	0.850296	6.08628e-08	1.09833e-06	37	1	23054915	F	EPHB2;EPHB2	NM_004442;NM_017449	Body;Body					TRUE			NA
cg00323842	1.45685	7.35274e-14	3.89666e-12	37	5	124044098	R	ZNF608	NM_020747	Body					TRUE			NA
cg00323861	-1.06669	0.000899991	0.0062287	37	4	70155747	R	UGT2B28	NM_053039	Body					NA			NA
cg00323916	1.19872	2.77998e-18	3.4209e-16	37	22	38057185	F	PDXP	NM_020315	Body	chr22:38054403-38055450	S_Shore		RDMR	TRUE	22:38056868-38057529	Promoter_Associated	TRUE
cg00324592	1.14965	3.26928e-08	6.21898e-07	37	8	42914541	F	FNTA;FNTA;FNTA	NM_001018677;NM_001018676;NM_002027	Body;Body;Body	chr8:42911215-42912042	S_Shelf			NA			NA
cg00325599	-0.251069	0.0013526	0.00887854	37	3	36986513	F	TRANK1;TRANK1	NM_014831;NM_014831	1stExon;5'UTR	chr3:36985540-36987041	Island	high-CpG:36961338-36961610	DMR	NA	3:36985431-36987301	Promoter_Associated	TRUE
cg00325750	0.506286	9.59821e-05	0.000869723	37	5	50675041	F				chr5:50678632-50679375	N_Shelf		DMR	NA			NA
cg00325920	-2.69544	3.0762e-19	4.59687e-17	37	3	61776005	R	PTPRG	NM_002841	Body					TRUE			NA
cg00326183	-0.856432	6.73927e-08	1.20666e-06	37	2	241808259	R	AGXT;AGXT	NM_000030;NM_000030	1stExon;5'UTR					NA			TRUE
cg00326231	-0.807343	0.000190365	0.00159192	37	22	19278249	F	CLTCL1;CLTCL1	NM_001835;NM_007098	Body;Body	chr22:19278671-19279573	N_Shore			NA	22:19278112-19279983	Promoter_Associated	NA
cg00326300	1.31808	7.60715e-10	1.96046e-08	37	1	33772032	F				chr1:33772146-33773104	N_Shore			TRUE	1:33772031-33772280	Unclassified_Cell_type_specific	NA
cg00326785	1.63907	5.79624e-10	1.52666e-08	37	7	22395217	R	RAPGEF5	NM_012294	5'UTR	chr7:22396039-22396852	N_Shore			NA	7:22395198-22395365	Unclassified_Cell_type_specific	NA
cg00326902	-0.511929	0.000580559	0.00424968	37	6	117747649	R	ROS1	NM_002944	TSS1500					NA			NA
cg00327332	1.36155	3.72229e-11	1.21535e-09	37	20	23498993	F	CSTT	NR_001279	TSS1500					NA			NA
cg00327577	1.33575	5.43773e-11	1.72235e-09	37	16	31214993	R	PYCARD;PYCARD	NM_013258;NM_145182	TSS1500;TSS1500	chr16:31213566-31214287	S_Shore			NA			NA
cg00327772	1.06052	1.72691e-05	0.000187119	37	14	75535155	R	FAM164C;FAM164C	NM_001042430;NM_024643	TSS1500;TSS1500	chr14:75535825-75536376	N_Shore			NA			NA
cg00328058	0.710309	1.4623e-05	0.000161276	37	1	901062	F	PLEKHN1;KLHL17;PLEKHN1	NM_001160184;NM_198317;NM_032129	TSS1500;3'UTR;TSS1500	chr1:894313-902654	Island			NA			NA
cg00328227	0.826135	1.12912e-06	1.58342e-05	37	1	109204325	R	C1orf59;C1orf59	NM_144584;NM_001102592	TSS200;TSS1500	chr1:109203593-109204378	Island			NA	1:109203476-109204442	Promoter_Associated	TRUE
cg00329272	0.703216	4.37439e-06	5.41921e-05	37	1	3191481	F	PRDM16;PRDM16	NM_022114;NM_199454	Body;Body	chr1:3195376-3196052	N_Shelf			NA	1:3191469-3191507	Unclassified_Cell_type_specific	NA
cg00329300	1.47924	2.15242e-06	2.8484e-05	37	1	161008462	R	TSTD1;TSTD1;TSTD1	NM_001113207;NM_001113205;NM_001113206	Body;Body;Body	chr1:161008377-161008830	Island			NA	1:161008079-161009395	Promoter_Associated	TRUE
cg00329411	-1.58979	1.2344e-12	5.25464e-11	37	5	55881858	F								TRUE			NA
cg00329697	-0.243554	0.000117545	0.00104085	37	1	45286062	R	PTCH2	NM_001166292	3'UTR					TRUE	1:45284879-45286657	Promoter_Associated	NA
cg00330825	0.967369	2.30757e-10	6.52683e-09	37	11	811545	F	RPLP2;SNORA52	NM_001004;NR_002585	Body;TSS200	chr11:809202-810509	S_Shore			NA			NA
cg00331283	0.491729	0.00128841	0.00851006	37	11	133917072	R								TRUE			NA
cg00331616	-0.895709	5.57855e-05	0.000535044	37	13	20207201	R	MPHOSPH8	NM_017520	TSS1500	chr13:20207461-20208252	N_Shore			NA	13:20207094-20208984	NonGene_Associated	NA
cg00332048	1.67438	4.40214e-11	1.4179e-09	37	7	18535072	F	HDAC9;HDAC9;HDAC9;HDAC9;HDAC9	NM_178423;NM_058176;NM_058177;NM_014707;NM_178425	TSS1500;TSS1500;TSS1500;TSS1500;TSS1500					TRUE			NA
cg00332126	-3.07327	1.81105e-28	2.19407e-25	37	11	44251108	F	EXT2;EXT2	NM_207122;NM_000401	Body;Body					TRUE			NA
cg00332155	-0.409529	0.000848021	0.00591611	37	15	35837878	R	ATPBD4;ATPBD4	NM_080650;NM_001141972	Body;Body	chr15:35838126-35838515	N_Shore			NA	15:35837630-35839119	Promoter_Associated	NA
cg00332421	0.789856	6.07542e-06	7.29966e-05	37	9	138590995	F	SOHLH1;SOHLH1	NM_001012415;NM_001101677	Body;Body	chr9:138591283-138591504	N_Shore			NA			NA
cg00332509	-0.77265	0.000149613	0.0012873	37	16	89363830	R	ANKRD11	NM_013275	Body					TRUE	16:89363821-89364370	Unclassified_Cell_type_specific	NA
cg00332822	2.60001	6.89218e-20	1.18643e-17	37	7	115897974	R	TES;TES	NM_152829;NM_015641	3'UTR;3'UTR					NA			NA
cg00333583	0.804107	0.000547407	0.00403738	37	15	85589274	R	PDE8A;PDE8A	NM_173454;NM_002605	Body;Body					TRUE			NA
cg00333679	0.892579	0.000227858	0.00186522	37	6	33943783	F				chr6:33943604-33944027	Island			NA			NA
cg00334177	0.885186	0.00138776	0.00908021	37	6	28511757	R								NA	6:28511439-28512144	Unclassified	NA
cg00334274	1.20055	3.1668e-05	0.000322682	37	22	30474915	F				chr22:30476012-30476530	N_Shore			NA	22:30474680-30475486	Unclassified_Cell_type_specific	NA
cg00334821	1.63462	4.78656e-09	1.06689e-07	37	7	73508994	F	LIMK1	NM_002314	Body				RDMR	NA			TRUE
cg00334863	1.42886	2.54666e-11	8.56032e-10	37	22	42779093	R	NFAM1	NM_145912	3'UTR					TRUE			NA
cg00334933	-1.30819	9.4543e-08	1.64596e-06	37	7	84629717	F	SEMA3D	NM_152754	Body					NA			NA
cg00335286	-0.837228	0.000157901	0.00134955	37	18	13916355	R	MC2R	NM_000529	TSS1500					NA			NA
cg00335744	0.699467	0.000879181	0.00610353	37	5	95298673	R	ELL2	NM_012081	TSS1500	chr5:95296368-95297438	S_Shore		RDMR	NA			NA
cg00335802	-1.42294	2.02422e-08	4.00443e-07	37	18	10791505	R	FAM38B	NM_022068	Body				CDMR	NA			NA
cg00335908	-2.31245	4.83006e-17	4.63791e-15	37	16	89002930	F	CBFA2T3;CBFA2T3	NM_175931;NM_005187	5'UTR;Body	chr16:89006334-89008600	N_Shelf			NA			TRUE
cg00336164	0.843507	4.4767e-05	0.000440013	37	2	219906404	R	CCDC108;CCDC108	NM_194302;NM_152389	TSS200;TSS200	chr2:219906107-219906328	S_Shore			NA			TRUE
cg00336700	1.53668	4.02471e-08	7.53544e-07	37	2	176943704	F				chr2:176944087-176948446	N_Shore			NA	2:176943502-176943765	Unclassified_Cell_type_specific	NA
cg00337020	3.25168	2.20675e-23	7.85074e-21	37	19	2241089	R	SF3A2	NM_007165	5'UTR	chr19:2235681-2237102	S_Shelf			NA	19:2241016-2241275	Promoter_Associated_Cell_type_specific	NA
cg00338529	0.48897	7.23004e-06	8.54373e-05	37	2	134948022	R				chr2:134949067-134949727	N_Shore			NA			NA
cg00338702	-0.744727	0.000142146	0.00123076	37	12	133463694	R	CHFR;CHFR;CHFR;CHFR;CHFR	NM_001161345;NM_001161347;NM_018223;NM_001161346;NM_001161344	Body;Body;Body;Body;Body	chr12:133463807-133464858	N_Shore		DMR	NA	12:133463273-133464970	Unclassified	NA
cg00339682	1.73169	5.25357e-15	3.42788e-13	37	4	13531163	F				chr4:13530847-13531244	Island			NA			NA
cg00339913	0.871784	0.000580047	0.00424624	37	8	22085227	R	PHYHIP;PHYHIP	NM_014759;NM_001099335	Body;Body					TRUE			TRUE
cg00340102	0.520024	0.00154204	0.00994088	37	20	34129456	F	ERGIC3;ERGIC3	NM_198398;NM_015966	TSS1500;TSS1500	chr20:34129537-34130038	N_Shore			NA	20:34129072-34130302	Promoter_Associated	NA
cg00340138	-1.95369	8.10404e-27	6.58339e-24	37	1	247466949	F	ZNF496	NM_032752	Body	chr1:247463848-247464710	S_Shelf			NA			NA
cg00340584	0.634008	1.56386e-05	0.000171327	37	1	149512963	F				chr1:149514271-149514592	N_Shore			NA			NA
cg00340855	0.866263	7.81999e-05	0.00072338	37	6	30458586	F	HLA-E	NM_005516	Body	chr6:30457369-30458175	S_Shore			NA			NA
cg00341042	-1.76879	9.20988e-12	3.35641e-10	37	10	116854499	F	ATRNL1	NM_207303	Body	chr10:116852261-116854094	S_Shore			NA			NA
cg00341204	2.11713	1.44922e-17	1.55117e-15	37	19	11520483	F	RGL3;RGL3	NM_001161616;NM_001035223	Body;Body	chr19:11517059-11517284	S_Shelf			NA			NA
cg00341297	1.12058	4.79758e-13	2.19804e-11	37	1	15515211	F	TMEM51;TMEM51;TMEM51;TMEM51	NM_001136218;NM_018022;NM_001136216;NM_001136217	5'UTR;5'UTR;5'UTR;5'UTR					TRUE			NA
cg00341885	-3.28965	2.76636e-18	3.40571e-16	37	19	4323034	R	FSD1	NM_024333	Body	chr19:4322974-4323201	Island			NA			NA
cg00342590	0.568066	3.98618e-05	0.000396609	37	19	50864954	F	NAPSA	NM_004851	Body	chr19:50860846-50861263	S_Shelf			NA			NA
cg00344372	0.521959	0.000187561	0.00157115	37	4	3443625	F	HGFAC	NM_001528	TSS200					NA	4:3443585-3443702	Unclassified_Cell_type_specific	NA
cg00344422	0.53906	0.00066002	0.00475336	37	13	100149311	R				chr13:100150692-100151020	N_Shore		DMR	NA	13:100148847-100149341	Unclassified	NA
cg00344655	-0.455292	0.000235504	0.00192052	37	1	21604592	R	ECE1;ECE1;ECE1;ECE1	NM_001113347;NM_001397;NM_001113349;NM_001113348	Body;Body;Body;Body					TRUE			NA
cg00346208	5.15067	4.1391e-27	3.62219e-24	37	1	20669905	R	VWA5B1	NM_001039500	Body	chr1:20669566-20670018	Island			NA	1:20669755-20670772	Unclassified_Cell_type_specific	TRUE
cg00346376	1.51621	6.22558e-13	2.79267e-11	37	5	1110089	R	SLC12A7	NM_006598	Body	chr5:1111396-1112388	N_Shore			NA			NA
cg00346898	1.24142	3.32762e-11	1.09614e-09	37	1	231761721	R	TSNAX-DISC1;DISC1;DISC1;DISC1;DISC1;TSNAX-DISC1;DISC1;DISC1;TSNAX-DISC1;DISC1;TSNAX-DISC1;DISC1;DISC1;TSNAX-DISC1;DISC1;DISC1;DISC1;DISC1;DISC1;DISC1;DISC1;DISC1;DISC1;TSNAX-DISC1;TSNAX-DISC1;DISC1;DISC1;DISC1;TSNAX-DISC1;DISC1;DISC1	NR_028394;NM_001164556;NM_001164538;NM_018662;NM_001164555;NR_028397;NM_001164554;NM_001164552;NR_028393;NM_001164537;NR_028400;NM_001164551;NM_001164539;NR_028398;NM_001164540;NM_001164542;NM_001164548;NM_001012959;NM_001164547;NM_001164550;NM_001164546;NM_001012957;NM_001012958;NR_028399;NR_028395;NM_001164545;NM_001164549;NM_001164544;NR_028396;NM_001164553;NM_001164541	Body;TSS1500;TSS1500;TSS1500;TSS1500;Body;TSS1500;TSS1500;Body;TSS1500;Body;TSS1500;TSS1500;Body;TSS1500;TSS1500;TSS1500;TSS1500;TSS1500;TSS1500;TSS1500;TSS1500;TSS1500;Body;Body;TSS1500;TSS1500;TSS1500;Body;TSS1500;TSS1500	chr1:231762414-231763115	N_Shore			NA			NA
cg00346985	1.47419	0.000160311	0.00136758	37	1	46940516	R				chr1:46940236-46940437	S_Shore			NA			NA
cg00347673	0.655237	6.82129e-10	1.77261e-08	37	2	163033514	F	FAP	NM_004460	Body					TRUE			NA
cg00347746	1.51243	6.93261e-07	1.01459e-05	37	19	48970082	F				chr19:48972225-48973157	N_Shelf			NA			TRUE
cg00347757	2.86087	1.46109e-09	3.57324e-08	37	13	20768560	R	GJB2	NM_004004	TSS1500	chr13:20766208-20767779	S_Shore			NA			NA
cg00347863	2.07421	1.31996e-15	9.63981e-14	37	7	94220697	R	SGCE;SGCE;SGCE	NM_001099400;NM_001099401;NM_003919	Body;Body;Body					TRUE			NA
cg00348222	-1.74819	2.097e-08	4.13423e-07	37	16	1170618	R								NA			NA
cg00348763	-0.775616	3.84163e-05	0.000383856	37	19	40696613	R	MAP3K10	NM_002446	TSS1500	chr19:40696811-40698193	N_Shore			NA	19:40696575-40697539	Promoter_Associated	NA
cg00348891	-0.908182	1.42058e-05	0.000157231	37	13	46251914	R								TRUE			NA
cg00348992	-0.919662	1.77312e-06	2.3876e-05	37	1	245365165	F	KIF26B	NM_018012	Body					TRUE			NA
cg00349061	0.946496	0.00115104	0.00771617	37	1	26371865	R	SLC30A2;SLC30A2	NM_032513;NM_001004434	Body;Body	chr1:26372281-26373313	N_Shore			TRUE	1:26371763-26372025	Unclassified_Cell_type_specific	TRUE
cg00350296	-0.876786	0.000360746	0.00280147	37	11	66084841	R	CD248	NM_020404	TSS1500	chr11:66083572-66083782	S_Shore			TRUE			TRUE
cg00350304	1.34443	3.97514e-14	2.21429e-12	37	16	85409269	F				chr16:85407314-85407576	S_Shore			NA			NA
cg00350405	-0.990753	1.68503e-10	4.89954e-09	37	2	128244940	F	IWS1	NM_017969	Body					TRUE			NA
cg00350432	1.13376	4.44379e-07	6.75612e-06	37	15	67065190	R	SMAD6;SMAD6;SMAD6	NM_001142861;NR_027654;NM_005585	Body;Body;Body					TRUE			NA
cg00350615	1.40313	2.31745e-11	7.84091e-10	37	6	33141152	R	COL11A2;COL11A2;COL11A2	NM_080679;NM_080681;NM_080680	Body;Body;Body					NA			NA
cg00351324	-1.61161	3.66342e-05	0.000368133	37	10	106028537	R	GSTO2	NM_183239	TSS200	chr10:106028542-106029047	N_Shore			NA	10:106027989-106029477	Promoter_Associated	TRUE
cg00351443	0.909426	1.32507e-06	1.82992e-05	37	10	105252720	R	NEURL	NM_004210	TSS1500	chr10:105253191-105254428	N_Shore			TRUE			TRUE
cg00351537	-0.974303	5.95659e-08	1.07717e-06	37	19	7580275	F	ZNF358	NM_018083	TSS1500	chr19:7580824-7581415	N_Shore			NA	19:7580145-7580291	Unclassified_Cell_type_specific	NA
cg00352027	1.43923	4.70069e-12	1.80897e-10	37	10	71893159	F	AIFM2	NM_032797	TSS1500	chr10:71892092-71892802	S_Shore			NA			NA
cg00352652	1.92109	1.95206e-17	2.03128e-15	37	16	88547533	R	ZFPM1	NM_153813	Body					NA			NA
cg00352780	1.3338	2.14424e-10	6.10336e-09	37	20	33544183	R	GSS	NM_000178	TSS1500	chr20:33543082-33543846	S_Shore			TRUE	20:33543031-33544467	Promoter_Associated	NA
cg00353330	-1.13031	2.53934e-05	0.000264829	37	4	101715708	R								TRUE			NA
cg00353353	-3.17236	1.83412e-18	2.34839e-16	37	7	157371980	R	PTPRN2;PTPRN2;PTPRN2	NM_002847;NM_130842;NM_130843	Body;Body;Body	chr7:157369120-157369394	S_Shelf		RDMR	NA			NA
cg00354437	-1.18215	1.9883e-06	2.64988e-05	37	16	87133690	F								TRUE			NA
cg00354572	1.15178	1.67899e-06	2.26999e-05	37	12	81471419	R	ACSS3	NM_024560	TSS1500	chr12:81471569-81472119	N_Shore			NA			NA
cg00354863	1.58168	1.4509e-11	5.10158e-10	37	8	37886955	R	EIF4EBP1	NM_004095	TSS1500	chr8:37887692-37888830	N_Shore			NA			NA
cg00355188	0.792327	7.59842e-09	1.63096e-07	37	10	134053962	R	STK32C	NM_173575	Body					NA			NA
cg00355656	1.97671	3.34076e-17	3.32206e-15	37	1	229692519	R	ABCB10	NM_012089	Body	chr1:229693772-229695074	N_Shore			NA	1:229692398-229692561	Promoter_Associated_Cell_type_specific	NA
cg00355699	-1.49953	1.68386e-05	0.000183009	37	13	104667830	F								TRUE			NA
cg00356131	-2.96335	3.54975e-14	1.99531e-12	37	5	72593933	F				chr5:72594147-72595808	N_Shore		RDMR	TRUE			NA
cg00356183	2.07068	2.0982e-10	5.98318e-09	37	7	751833	F	PRKAR1B;PRKAR1B;PRKAR1B;PRKAR1B;PRKAR1B;PRKAR1B	NM_002735;NM_001164760;NM_001164761;NM_001164762;NM_001164759;NM_001164758	5'UTR;5'UTR;5'UTR;5'UTR;5'UTR;5'UTR	chr7:751712-752150	Island			NA			TRUE
cg00356645	0.609331	0.00014732	0.00127022	37	6	170594229	F	DLL1	NM_005618	Body	chr6:170592384-170593079	S_Shore			NA			NA
cg00356829	0.886923	2.11262e-05	0.000224358	37	16	30025364	F				chr16:30022651-30023007	S_Shelf			NA			NA
cg00356916	-1.79797	2.70576e-12	1.08231e-10	37	1	116256618	F	CASQ2	NM_001232	Body					TRUE			NA
cg00357546	-0.488543	8.85104e-05	0.000808922	37	10	135032154	F	KNDC1	NM_152643	Body	chr10:135033330-135033739	N_Shore			TRUE			TRUE
cg00357958	-1.50106	4.5399e-09	1.01552e-07	37	12	123215010	R	GPR81;GPR81	NM_032554;NM_032554	1stExon;5'UTR					NA	12:123214989-123215200	Unclassified_Cell_type_specific	NA
cg00358023	0.691927	3.72228e-06	4.68362e-05	37	7	157217482	R				chr7:157216598-157216949	S_Shore			NA			NA
cg00359465	0.686516	4.61327e-08	8.54209e-07	37	1	2004346	F	PRKCZ;PRKCZ	NM_001033581;NM_002744	TSS1500;Body	chr1:2005179-2005565	N_Shore			NA			TRUE
cg00359590	0.80247	8.2488e-06	9.62488e-05	37	8	27469673	R	CLU;CLU;CLU	NM_001171138;NM_001831;NM_203339	TSS1500;Body;TSS1500	chr8:27471954-27472523	N_Shelf			NA			NA
cg00360324	0.412348	0.000237103	0.00193182	37	2	27716823	R	FNDC4	NM_022823	Body	chr2:27717681-27718337	N_Shore			NA			NA
cg00360610	0.963784	1.14471e-07	1.95879e-06	37	2	96970381	R	SNRNP200	NM_014014	Body	chr2:96971125-96971556	N_Shore			NA			NA
cg00360798	2.4752	2.58853e-21	6.07023e-19	37	7	140139524	R				chr7:140135364-140135620	S_Shelf			NA			NA
cg00361025	0.711113	0.000368116	0.00285257	37	7	39451576	F	POU6F2;POU6F2	NM_007252;NM_001166018	Body;Body	chr7:39453515-39454291	N_Shore			NA			NA
cg00362657	-1.87518	0.000165128	0.00140405	37	21	44876670	F				chr21:44876603-44876827	Island		DMR	NA	21:44876220-44876975	Unclassified_Cell_type_specific	NA
cg00363737	-3.89474	2.11569e-22	6.20709e-20	37	10	116031419	F	VWA2	NM_198496	Body					TRUE			TRUE
cg00363845	-1.41289	3.42526e-07	5.33163e-06	37	19	17446137	F	ANO8	NM_020959	TSS1500	chr19:17443965-17444633	S_Shore			NA	19:17444394-17446224	Promoter_Associated	NA
cg00364304	-0.776511	6.16327e-05	0.000585166	37	16	79381402	R								TRUE			NA
cg00364457	1.14502	1.28129e-13	6.50216e-12	37	6	38608738	F	BTBD9;BTBD9	NM_052893;NM_001099272	TSS1500;TSS1500	chr6:38607205-38607462	S_Shore			NA			NA
cg00364615	1.34103	4.44647e-12	1.71729e-10	37	15	67424723	F	SMAD3;SMAD3	NM_005902;NM_001145102	Body;5'UTR					TRUE			NA
cg00364644	-1.49918	6.8394e-09	1.4813e-07	37	16	88234627	R				chr16:88233988-88234190	S_Shore			NA			TRUE
cg00366037	2.46843	1.7175e-17	1.80703e-15	37	10	76781121	F	MYST4	NM_012330	Body					TRUE			NA
cg00366412	1.62421	1.99166e-10	5.7069e-09	37	17	72539810	R	CD300C	NM_006678	Body					NA			NA
cg00367863	-0.452862	0.000947877	0.00651994	37	16	29854122	F	MVP;MVP	NM_017458;NM_005115	Body;Body	chr16:29855903-29856195	N_Shore			NA			NA
cg00367962	-1.53253	1.44069e-06	1.97571e-05	37	2	240508665	F								NA			NA
cg00368296	-0.521738	0.000411588	0.00314651	37	19	8052183	R	ELAVL1	NM_001419	Body					TRUE			TRUE
cg00368356	1.92529	7.78061e-21	1.64147e-18	37	19	39395717	R	NFKBIB;NFKBIB	NM_001001716;NM_002503	Body;Body	chr19:39395881-39396106	N_Shore			NA			NA
cg00368577	1.55013	4.68565e-08	8.66161e-07	37	12	52915064	R	KRT5	NM_000424	TSS1500					NA			NA
cg00369142	0.836049	0.000152759	0.00131069	37	3	135864939	R	PPP2R3A;PPP2R3A	NM_181897;NM_002718	3'UTR;3'UTR					NA			NA
cg00369333	-0.572134	0.000796591	0.00560478	37	19	54495381	R	CACNG6;CACNG6;CACNG6	NM_145814;NM_031897;NM_145815	TSS200;TSS200;TSS200	chr19:54496202-54496612	N_Shore			NA	19:54495120-54495387	Unclassified_Cell_type_specific	TRUE
cg00369909	-0.635447	1.03484e-07	1.78569e-06	37	22	42060908	F				chr22:42062790-42063002	N_Shore			NA			NA
cg00370047	-1.88314	9.7196e-11	2.94567e-09	37	11	1481436	F	BRSK2	NM_003957	Body	chr11:1481390-1481615	Island			TRUE	11:1481359-1481437	Unclassified_Cell_type_specific	NA
cg00370229	-2.81354	1.4322e-07	2.40511e-06	37	6	29521602	F				chr6:29521110-29521833	Island		DMR	TRUE			NA
cg00370608	0.512517	0.000147971	0.00127516	37	16	70784519	F	VAC14	NM_018052	Body					TRUE			NA
cg00370820	-0.291983	0.000813318	0.00570485	37	22	39101671	R	GTPBP1	NM_004286	TSS200	chr22:39101825-39102668	N_Shore			NA	22:39101147-39103108	Promoter_Associated	NA
cg00371702	1.28593	1.25747e-09	3.11223e-08	37	3	25469125	F	RARB;RARB	NM_000965;NM_016152	TSS1500;TSS1500					NA			NA
cg00372132	-1.13905	6.18955e-08	1.11549e-06	37	4	48520387	R	FRYL	NM_015030	Body					TRUE			NA
cg00372249	0.549822	0.000801828	0.00563521	37	4	185745711	F	ACSL1	NM_001995	5'UTR	chr4:185746557-185747827	N_Shore			NA			NA
cg00372774	-3.35792	7.1718e-22	1.90038e-19	37	22	22902198	R	PRAME;PRAME;LOC648691;PRAME;PRAME;PRAME	NM_206953;NM_006115;NR_027426;NM_206954;NM_206955;NM_206956	TSS1500;TSS1500;Body;TSS1500;TSS1500;TSS1500	chr22:22901386-22901698	S_Shore			NA	22:22901407-22902256	Unclassified	NA
cg00372908	-0.388205	0.000145654	0.00125743	37	2	174523069	R								TRUE			TRUE
cg00373101	-0.40173	0.00134169	0.00881517	37	16	19125146	R	ITPRIPL2;ITPRIPL2	NM_001034841;NR_028028	TSS200;TSS200	chr16:19125136-19126607	Island			NA	16:19125087-19125480	Unclassified_Cell_type_specific	NA
cg00373436	1.8421	2.83334e-09	6.57737e-08	37	3	111721343	R	TAGLN3;TAGLN3;TAGLN3	NM_001008272;NM_001008273;NM_013259	Body;Body;Body					TRUE			NA
cg00373763	-0.277687	0.000601917	0.00438642	37	13	50908713	R								TRUE			NA
cg00374229	-1.15147	0.000365086	0.00283167	37	2	186182966	R								TRUE			NA
cg00374747	-0.629126	5.2782e-05	0.000509087	37	11	2907930	F	CDKN1C;CDKN1C;CDKN1C	NM_000076;NM_001122631;NM_001122630	TSS1500;TSS1500;TSS1500	chr11:2905023-2907024	S_Shore			NA			NA
cg00375025	1.88396	4.47808e-10	1.20564e-08	37	3	155860932	R	KCNAB1;KCNAB1;KCNAB1	NM_003471;NM_003471;NM_172160	1stExon;5'UTR;Body					NA			NA
cg00375146	-1.62548	5.3223e-09	1.17608e-07	37	11	1221812	R				chr11:1221571-1221863	Island			NA			NA
cg00375608	1.89974	4.22756e-06	5.25278e-05	37	7	1607787	F	PSMG3;PSMG3	NM_032302;NM_001134340	Body;Body	chr7:1609568-1610037	N_Shore			TRUE			TRUE
cg00376480	0.908739	3.13347e-08	5.97985e-07	37	21	46892832	F	COL18A1;COL18A1;COL18A1	NM_130444;NM_030582;NM_130445	Body;Body;Body	chr21:46894816-46896312	N_Shore			TRUE			NA
cg00376553	1.164	0.000179793	0.00151338	37	7	100073281	R	TSC22D4	NM_030935	Body	chr7:100075303-100075551	N_Shelf			NA			NA
cg00376979	-1.47855	1.22114e-05	0.000137171	37	21	34350727	R				chr21:34350726-34350961	Island			TRUE			NA
cg00377074	0.905498	1.41868e-07	2.38368e-06	37	6	134159127	R	MGC34034;MGC34034	NR_027029;NR_027030	Body;Body	chr6:134159126-134159349	Island			NA	6:134158712-134159661	Unclassified	NA
cg00377320	0.526888	1.16959e-05	0.000131992	37	17	47988100	F				chr17:47987524-47988101	Island			NA	17:47987568-47988333	Unclassified_Cell_type_specific	TRUE
cg00377497	2.26008	6.06403e-14	3.26202e-12	37	8	27167110	F	TRIM35	NM_171982	Body	chr8:27168205-27169082	N_Shore			NA			NA
cg00377915	2.10389	3.99106e-16	3.22802e-14	37	10	70631035	F	STOX1;STOX1;STOX1;STOX1;STOX1	NM_001130162;NM_001130160;NM_152709;NM_001130161;NM_001130159	5'UTR;Body;Body;Body;Body					TRUE			NA
cg00377924	-1.38866	3.38504e-09	7.74568e-08	37	3	107535430	F								TRUE			NA
cg00378423	1.77854	8.26858e-13	3.62849e-11	37	17	36876238	R	MLLT6	NM_005937	Body					TRUE			NA
cg00378636	-1.06896	3.13998e-08	5.99034e-07	37	19	12862636	F	BEST2	NM_017682	TSS1500	chr19:12865419-12865825	N_Shelf			NA			NA
cg00378999	-1.44294	2.55616e-05	0.00026637	37	11	3246380	R								NA			NA
cg00379377	-0.438426	0.00117736	0.00786974	37	6	151518101	R								TRUE			NA
cg00380435	0.548829	1.15026e-06	1.6102e-05	37	14	105196312	R	ADSSL1;ADSSL1	NM_199165;NM_152328	1stExon;Body					NA			NA
cg00380930	1.25621	1.88784e-12	7.77644e-11	37	3	182443989	R								TRUE			NA
cg00382053	-0.660315	0.00102716	0.0069925	37	16	20359444	R	UMOD;UMOD	NM_003361;NM_001008389	Body;Body	chr16:20359767-20360498	N_Shore			NA			NA
cg00382470	1.13234	9.49348e-10	2.40271e-08	37	6	38141572	R	BTBD9;BTBD9;BTBD9	NM_052893;NM_152733;NM_001099272	3'UTR;3'UTR;3'UTR					NA	6:38141446-38141624	Unclassified_Cell_type_specific	NA
cg00383081	-1.53819	2.60578e-06	3.3879e-05	37	1	182362088	F	GLUL;GLUL	NM_001033044;NM_002065	TSS1500;TSS1500	chr1:182359697-182361563	S_Shore		RDMR	NA			NA
cg00383290	-0.732203	7.79021e-10	2.00345e-08	37	1	234509457	R	C1orf31;C1orf31	NM_001012985;NM_001012985	1stExon;5'UTR	chr1:234508994-234509501	Island			NA	1:234508586-234510198	Promoter_Associated	NA
cg00383763	-2.2556	7.69413e-21	1.62575e-18	37	1	202682124	F				chr1:202678881-202679769	S_Shelf			NA			NA
cg00383793	0.839877	0.000554441	0.00408232	37	3	50488162	R	CACNA2D2;CACNA2D2	NM_001005505;NM_006030	Body;Body					NA	3:50487465-50488502	Unclassified_Cell_type_specific	NA
cg00385596	-1.64832	2.80515e-19	4.22746e-17	37	11	76088726	F	PRKRIR	NM_004705	Body	chr11:76091524-76092638	N_Shelf			NA			NA
cg00386586	-1.28997	2.38202e-06	3.12271e-05	37	13	114917527	F				chr13:114914536-114914753	S_Shelf			NA			NA
cg00386725	1.00035	3.553e-06	4.48807e-05	37	1	18617791	R	IGSF21	NM_032880	Body					TRUE			NA
cg00387445	2.266	5.01918e-15	3.28916e-13	37	1	151584078	F	SNX27	NM_030918	TSS1500	chr1:151584374-151585205	N_Shore			NA	1:151583940-151585757	Promoter_Associated	NA
cg00387658	0.826546	1.02403e-06	1.44956e-05	37	20	54986793	F	CASS4;CASS4;CASS4;CASS4	NM_001164116;NM_001164114;NM_001164115;NM_020356	TSS1500;TSS1500;TSS1500;TSS1500					TRUE	20:54986738-54987675	Promoter_Associated_Cell_type_specific	NA
cg00388197	2.13664	6.69253e-16	5.18079e-14	37	14	50558910	R	C14orf183	NM_001014830	Body					NA			NA
cg00388503	3.1604	9.802e-15	6.09251e-13	37	2	64372160	R	PELI1	NM_020651	TSS1500	chr2:64370888-64371811	S_Shore			NA			NA
cg00390259	-0.823166	3.74435e-06	4.7079e-05	37	13	106650270	F								NA			NA
cg00390724	-1.31992	4.32317e-08	8.04708e-07	37	3	18484742	F				chr3:18485112-18487056	N_Shore		RDMR	NA	3:18484698-18485015	Promoter_Associated_Cell_type_specific	NA
cg00390784	-2.32309	5.35518e-19	7.59869e-17	37	6	2682491	F	MYLK4	NM_001012418	Body	chr6:2685400-2685625	N_Shelf			NA			NA
cg00390941	0.798585	5.26546e-07	7.88802e-06	37	12	15124659	F	PDE6H	NM_006205	TSS1500					NA			NA
cg00391247	0.451531	0.00060557	0.00440902	37	12	31378024	R								TRUE			NA
cg00392155	3.06815	2.02916e-11	6.94909e-10	37	2	225305951	F				chr2:225306900-225307500	N_Shore			NA			NA
cg00392257	0.773132	0.000155237	0.00132932	37	1	156696747	R	ISG20L2	NM_030980	1stExon	chr1:156698111-156698916	N_Shore		RDMR	TRUE			NA
cg00392396	-1.66396	9.04516e-14	4.72117e-12	37	15	29409632	R	APBA2;APBA2	NM_005503;NM_001130414	3'UTR;3'UTR	chr15:29407695-29408229	S_Shore			NA	15:29409587-29409684	Unclassified_Cell_type_specific	NA
cg00393193	0.537002	3.95174e-05	0.000393595	37	5	176959146	R	FAM193B;FAM193B	NM_019057;NR_024019	Body;Body	chr5:176958301-176958517	S_Shore			NA			NA
cg00393435	-0.219449	0.000315764	0.00249105	37	22	39052596	R	LOC646851;LOC646851;CBY1;CBY1	NM_001013647;NM_001013647;NM_015373;NM_001002880	1stExon;5'UTR;TSS200;TSS200	chr22:39052054-39053054	Island	high-CpG:37382252-37382543		NA	22:39051686-39053639	Promoter_Associated	NA
cg00393487	1.11503	0.000233605	0.00190732	37	3	186916546	F	RTP1	NM_153708	Body	chr3:186917411-186917756	N_Shore			NA			NA
cg00394180	0.614825	0.00145993	0.00948324	37	8	97167170	R	GDF6	NM_001001557	Body	chr8:97169731-97170432	N_Shelf			TRUE	8:97167135-97167213	Unclassified_Cell_type_specific	NA
cg00394214	-0.400909	0.000161028	0.00137306	37	19	17420434	R	DDA1;DDA1	NM_024050;NM_024050	5'UTR;1stExon	chr19:17420717-17420939	N_Shore	high-CpG:17281216-17281447		NA	19:17419952-17421049	Promoter_Associated	NA
cg00394658	0.934476	1.55101e-07	2.58631e-06	37	11	48001669	R	PTPRJ;PTPRJ	NM_001098503;NM_002843	TSS1500;TSS1500	chr11:48001604-48003170	Island			NA			NA
cg00394718	-2.48823	7.62888e-11	2.35671e-09	37	8	120684921	F								TRUE			NA
cg00395140	0.668176	0.00123989	0.00823035	37	19	3063728	F	AES;AES;AES	NM_198969;NM_198970;NM_001130	TSS1500;TSS1500;TSS1500	chr19:3061188-3061952	S_Shore			NA			NA
cg00395486	-1.12403	5.78835e-07	8.60245e-06	37	6	143997701	F	PHACTR2;PHACTR2;PHACTR2;PHACTR2	NM_001100165;NM_001100166;NM_014721;NM_001100164	TSS1500;Body;Body;TSS1500	chr6:143999154-143999667	N_Shore			NA			NA
cg00395501	-0.837838	1.94743e-06	2.60094e-05	37	1	93296860	R	RPL5	NM_000969	TSS1500	chr1:93297498-93298122	N_Shore			NA	1:93296804-93298515	Unclassified	NA
cg00395579	0.67109	0.000469447	0.00353039	37	8	103243598	R	RRM2B	NM_015713	Body					TRUE			NA
cg00395990	0.976689	7.6439e-08	1.35443e-06	37	11	119054921	F	PDZD3;PDZD3	NM_024791;NM_001168468	TSS1500;TSS1500					NA			NA
cg00396427	1.26293	8.13672e-07	1.17454e-05	37	16	25023604	R	ARHGAP17;ARHGAP17	NM_001006634;NM_018054	Body;Body	chr16:25026067-25026538	N_Shelf			NA			NA
cg00396667	-2.00545	0.000297245	0.00236057	37	5	134364387	R	PITX1	NM_002653	3'UTR	chr5:134363092-134365146	Island		DMR	NA			NA
cg00396865	1.35137	2.66376e-11	8.92966e-10	37	9	139620597	R	SNHG7;SNORA43;SNHG7;SNHG7	NR_003672;NR_002975;NR_024543;NR_024542	Body;Body;Body;Body	chr9:139622242-139623428	N_Shore			NA			NA
cg00396910	1.61894	6.04776e-14	3.25412e-12	37	2	166563180	F								TRUE			NA
cg00397103	-1.13969	6.19305e-06	7.42744e-05	37	1	5540008	R								NA			NA
cg00397422	-0.741456	0.000964343	0.00661903	37	17	33885049	R	SLFN14	NM_001129820	1stExon					NA			NA
cg00397479	2.28886	1.11183e-09	2.78113e-08	37	6	31831510	R	NEU1;SLC44A4	NM_000434;NM_025257	TSS1500;Body	chr6:31830299-31830948	S_Shore			NA	6:31831285-31832200	Promoter_Associated	NA
cg00397764	1.66072	3.27209e-15	2.21767e-13	37	10	115939717	F	TDRD1	NM_198795	5'UTR	chr10:115938962-115939292	S_Shore			TRUE			NA
cg00398816	0.568437	0.000496196	0.00370436	37	10	43598772	F	RET;RET	NM_020630;NM_020975	Body;Body	chr10:43600146-43601165	N_Shore			NA	10:43598510-43598956	Unclassified_Cell_type_specific	NA
cg00399027	-1.03329	3.02248e-05	0.000309421	37	16	85676861	R	KIAA0182;KIAA0182	NM_001134473;NM_014615	5'UTR;Body	chr16:85674843-85675192	S_Shore			NA			NA
cg00400987	-1.33228	7.22862e-07	1.05356e-05	37	16	28915821	R	ATP2A1;ATP2A1;RABEP2	NM_173201;NM_004320;NM_024816	3'UTR;3'UTR;3'UTR	chr16:28911944-28912183	S_Shelf			NA			NA
cg00401234	-1.68335	4.72397e-11	1.51296e-09	37	20	17554599	R	DSTN;DSTN	NM_006870;NM_001011546	Body;5'UTR	chr20:17550330-17551317	S_Shelf			NA			NA
cg00401433	1.36901	1.25378e-05	0.000140437	37	8	106674239	F	ZFPM2	NM_012082	Body					TRUE			NA
cg00401471	0.638528	1.06232e-05	0.000120933	37	19	38782834	R	SPINT2;SPINT2	NM_021102;NM_001166103	3'UTR;3'UTR					NA			NA
cg00401797	-1.46453	5.55481e-07	8.2809e-06	37	1	3315193	R	PRDM16;PRDM16	NM_022114;NM_199454	Body;Body					NA			NA
cg00401972	-0.669995	0.00123816	0.00821984	37	16	66400404	F	CDH5	NM_001795	TSS200					NA			NA
cg00402222	-0.72521	0.000374201	0.002894	37	5	178622572	R	ADAMTS2;ADAMTS2	NM_021599;NM_014244	Body;Body					NA			NA
cg00402352	-0.714486	0.00012565	0.0011038	37	11	134373160	F								TRUE			NA
cg00402381	1.05068	5.04063e-06	6.15888e-05	37	19	42416271	F				chr19:42416992-42417513	N_Shore		RDMR	NA			NA
cg00402668	-0.744293	6.37511e-05	0.000603242	37	6	32768079	R								NA			NA
cg00402873	0.83021	2.80166e-05	0.000289299	37	4	1333032	F	MAEA;MAEA	NM_005882;NM_001017405	3'UTR;3'UTR	chr4:1333378-1333676	N_Shore			NA			NA
cg00403478	0.943724	5.44425e-05	0.000523592	37	6	33040769	R	HLA-DPA1	NM_033554	Body					NA			NA
cg00403498	1.34519	5.04732e-06	6.16632e-05	37	6	32119923	R	PRRT1;PPT2	NM_030651;NM_138717	TSS1500;TSS1500	chr6:32121829-32122529	N_Shore			TRUE	6:32119682-32119933	Unclassified_Cell_type_specific	NA
cg00404394	0.46283	0.000305312	0.00241715	37	1	27960150	R	FGR	NM_005248	5'UTR	chr1:27960567-27961023	N_Shore			NA			NA
cg00404717	1.09021	0.000160957	0.00137254	37	4	174912178	R								NA	4:174911686-174912335	Unclassified_Cell_type_specific	NA
cg00405069	1.31402	5.30136e-09	1.1719e-07	37	1	52455390	R	RAB3B	NM_002867	5'UTR	chr1:52455970-52456453	N_Shore			NA			NA
cg00405152	-0.310302	0.00107	0.00724437	37	19	47217237	R	PRKD2;PRKD2;PRKD2;PRKD2;PRKD2	NM_001079880;NM_001079882;NM_016457;NM_001079881;NM_001079882	Body;5'UTR;Body;Body;1stExon	chr19:47217161-47217555	Island			NA	19:47216698-47218193	Promoter_Associated	NA
cg00405484	0.479282	0.000488276	0.00365139	37	8	141544373	R	EIF2C2;EIF2C2	NM_012154;NM_001164623	Body;Body	chr8:141545521-141545749	N_Shore			NA			NA
cg00405939	1.98278	6.02174e-07	8.91551e-06	37	19	4045108	R				chr19:4044917-4045154	Island			TRUE	19:4045070-4045208	Gene_Associated_Cell_type_specific	NA
cg00406023	-1.3443	2.98262e-10	8.28107e-09	37	11	120090023	F	OAF	NM_178507	Body					TRUE			NA
cg00406338	0.964107	1.83181e-07	3.01097e-06	37	20	57267528	R	NPEPL1	NM_024663	TSS1500	chr20:57267527-57268420	Island			NA			NA
cg00406796	-0.297074	0.000630478	0.00456949	37	19	40596516	F	ZNF780A;ZNF780A;ZNF780A;ZNF780A	NM_001010880;NM_001142579;NM_001142578;NM_001142577	5'UTR;5'UTR;5'UTR;5'UTR	chr19:40596540-40596863	N_Shore			NA	19:40596131-40597110	Promoter_Associated	TRUE
cg00406976	-0.373344	0.000456704	0.0034467	37	19	638588	F	FGF22	NM_020637	TSS1500	chr19:639150-639400	N_Shore			NA			NA
cg00407040	1.84036	9.17063e-10	2.32735e-08	37	10	14247935	R	FRMD4A	NM_018027	Body					TRUE			NA
cg00407062	1.07041	3.48392e-11	1.14292e-09	37	9	130964374	R	CIZ1;DNM1;DNM1;CIZ1	NM_012127;NM_001005336;NM_004408;NM_001131015	5'UTR;TSS1500;TSS1500;5'UTR	chr9:130965464-130966516	N_Shore			NA			NA
cg00407329	-1.32743	4.02289e-05	0.000399807	37	6	100893665	R	SIM1	NM_005068	Body	chr6:100895007-100895246	N_Shore			NA			NA
cg00407468	0.94599	7.99589e-09	1.71087e-07	37	9	126692955	R	DENND1A;DENND1A	NM_024820;NM_020946	TSS1500;TSS1500				RDMR	NA	9:126692040-126693081	Promoter_Associated	NA
cg00407820	-0.512086	6.8626e-05	0.000644185	37	6	150182095	F	LRP11	NM_032832	Body	chr6:150184344-150185505	N_Shelf			TRUE			NA
cg00408285	1.75821	8.61855e-07	1.2383e-05	37	16	85670262	R	KIAA0182;KIAA0182	NM_001134473;NM_014615	5'UTR;Body	chr16:85670134-85670349	Island			NA			NA
cg00408776	4.08293	8.37729e-27	6.75157e-24	37	5	1337571	F	CLPTM1L	NM_030782	Body	chr5:1339662-1340082	N_Shelf			NA			NA
cg00409104	0.683237	0.000238507	0.00194222	37	17	8762014	F	PIK3R6	NM_001010855	5'UTR					TRUE	17:8761932-8762095	Unclassified_Cell_type_specific	NA
cg00409126	2.96428	2.44277e-11	8.2308e-10	37	5	67730128	R								NA	5:67729978-67730609	Unclassified	TRUE
cg00409260	1.18259	2.84248e-09	6.59747e-08	37	8	143750236	R	JRK;JRK	NM_001077527;NM_003724	5'UTR;5'UTR	chr8:143750759-143751448	N_Shore			NA	8:143750099-143751838	Promoter_Associated	NA
cg00409309	0.724805	0.000115096	0.00102198	37	6	32783551	F	HLA-DOB	NM_002120	Body					NA			NA
cg00409434	-1.67813	4.72595e-07	7.14834e-06	37	2	46414317	R	PRKCE	NM_005400	3'UTR					TRUE			TRUE
cg00409658	0.587559	8.83594e-07	1.26712e-05	37	6	138744549	R	NHSL1;NHSL1	NM_001144060;NM_020464	3'UTR;3'UTR	chr6:138745348-138745593	N_Shore			NA			NA
cg00409844	1.57515	4.16404e-08	7.77559e-07	37	5	68798649	R	OCLN	NM_002538	5'UTR					TRUE			NA
cg00410534	0.553503	0.000105826	0.000948217	37	16	67232557	R	ELMO3;E2F4	NM_024712;NM_001950	TSS1500;3'UTR	chr16:67233032-67233862	N_Shore			TRUE	16:67231473-67233091	Gene_Associated	TRUE
cg00410926	-0.598547	0.00108617	0.00733739	37	9	35563534	R	FAM166B;FAM166B	NM_001164310;NM_001099951	Body;Body					TRUE			NA
cg00411097	0.911769	4.52411e-06	5.58601e-05	37	7	1596050	R	TMEM184A;TMEM184A	NM_001097620;NM_001097620	1stExon;5'UTR					TRUE	7:1594906-1596387	Unclassified_Cell_type_specific	NA
cg00411447	-0.278848	0.000309724	0.0024489	37	20	35402323	F	DSN1;DSN1;DSN1;DSN1;DSN1	NM_001145317;NM_001145315;NM_001145316;NM_024918;NM_001145318	TSS200;TSS200;TSS200;TSS200;TSS200	chr20:35401825-35402457	Island			NA	20:35401219-35403433	Promoter_Associated	NA
cg00411697	0.84425	1.7458e-06	2.35392e-05	37	11	116663321	R	APOA5;APOA5	NM_001166598;NM_052968	TSS200;TSS200	chr11:116661034-116661410	S_Shore			NA			NA
cg00411945	1.15681	2.0667e-08	4.08022e-07	37	10	45324999	F								TRUE			NA
cg00412094	0.540663	1.46351e-08	2.97505e-07	37	4	2794091	F	SH3BP2	NM_001122681	TSS1500	chr4:2794494-2794875	N_Shore			NA	4:2793976-2794232	Unclassified_Cell_type_specific	NA
cg00412675	-1.61055	1.30426e-08	2.67884e-07	37	8	11577758	R	GATA4	NM_002052	Body					TRUE			NA
cg00412851	2.27596	2.04106e-23	7.379e-21	37	6	15463343	F	JARID2	NM_004973	Body					TRUE			NA
cg00413066	0.294308	4.96637e-05	0.0004824	37	15	52405464	R	BCL2L10	NM_020396	TSS1500	chr15:52404191-52404978	S_Shore			NA			NA
cg00413250	-0.971257	2.90932e-06	3.74316e-05	37	16	13155767	F	SHISA9	NM_001145204	Body					TRUE			NA
cg00413838	-0.624945	0.000841914	0.00587944	37	8	49804177	F								TRUE			NA
cg00414384	-1.57395	2.73642e-06	3.54071e-05	37	11	68518048	F	MTL5;MTL5	NM_001039656;NM_004923	Body;Body	chr11:68517667-68518179	Island			NA	11:68517487-68519396	Unclassified	NA
cg00414835	0.441687	0.000919031	0.00634444	37	10	48439452	F	GDF10	NM_004962	TSS1500	chr10:48438411-48439320	S_Shore			NA	10:48438493-48439997	Unclassified_Cell_type_specific	NA
cg00415971	1.20469	1.52696e-05	0.000167635	37	10	86004761	R	RGR;RGR;RGR	NM_001012722;NM_002921;NM_001012720	TSS200;TSS200;TSS200					NA			NA
cg00415993	-0.85377	0.00137885	0.00902754	37	5	75919188	R	F2RL2;F2RL2;IQGAP2	NM_004101;NM_004101;NM_006633	1stExon;5'UTR;Body					NA			NA
cg00416130	0.908277	1.59232e-05	0.000174075	37	1	35257924	R	GJA4	NM_002060	TSS1500	chr1:35258564-35258791	N_Shore			NA			NA
cg00416206	-0.751275	5.4743e-06	6.63943e-05	37	5	54015681	R								TRUE			NA
cg00416243	1.15296	7.57867e-06	8.91414e-05	37	6	143857467	R				chr6:143857743-143858751	N_Shore			NA			NA
cg00416882	-0.567047	0.00102832	0.00699967	37	18	44495671	R	PIAS2;PIAS2	NM_173206;NM_004671	Body;Body	chr18:44496910-44497832	N_Shore		RDMR	NA			NA
cg00417131	0.561786	0.000486548	0.00364033	37	6	89828674	F	SFRS13B	NM_080743	TSS1500	chr6:89827134-89828122	S_Shore			NA			NA
cg00417147	-1.34952	1.08216e-09	2.71459e-08	37	12	125578545	R	AACS	NM_023928	Body	chr12:125578348-125578588	Island			NA			NA
cg00417197	2.2365	2.27012e-10	6.42982e-09	37	7	111817978	R	DOCK4	NM_014705	Body					TRUE			NA
cg00417304	2.07788	1.79182e-15	1.27569e-13	37	11	45124456	R	PRDM11	NM_020229	Body					TRUE	11:45123798-45125253	Unclassified	NA
cg00417424	0.921617	6.09977e-09	1.33293e-07	37	5	179224563	R				chr5:179224732-179224985	N_Shore			NA			NA
cg00417757	-0.258384	0.000746116	0.00529127	37	7	105172974	R	RINT1	NM_021930	Body	chr7:105172468-105172821	S_Shore			NA	7:105171811-105173334	Promoter_Associated	NA
cg00418068	1.26411	5.17649e-07	7.76815e-06	37	1	33895505	R				chr1:33896002-33896929	N_Shore		RDMR	TRUE			NA
cg00418150	0.616006	0.000951742	0.00654377	37	11	44327869	R	ALX4	NM_021926	Body	chr11:44327240-44327932	Island		RDMR	NA	11:44326437-44328397	Unclassified_Cell_type_specific	TRUE
cg00418163	-0.910775	1.91724e-05	0.00020539	37	12	83476631	F	TMTC2	NM_152588	Body					TRUE			NA
cg00418663	0.84399	8.49146e-07	1.22164e-05	37	10	73491922	F	C10orf105;CDH23	NM_001168390;NM_022124	5'UTR;Body					NA			NA
cg00418743	-0.277648	0.000749132	0.00531017	37	6	43544011	F	XPO5;POLH;POLH	NM_020750;NM_006502;NM_006502	TSS200;1stExon;5'UTR	chr6:43543124-43544076	Island			NA	6:43542934-43544599	Promoter_Associated	NA
cg00419333	-0.30338	0.000863772	0.00600945	37	16	69458555	R	CYB5B;CYB5B	NM_030579;NM_030579	1stExon;5'UTR	chr16:69458264-69458626	Island			NA	16:69458035-69458990	Promoter_Associated	NA
cg00420347	1.3512	1.74891e-20	3.42726e-18	37	1	65362428	R	JAK1	NM_002227	5'UTR					TRUE			NA
cg00420348	2.16318	1.39746e-07	2.35055e-06	37	11	830190	R	EFCAB4A	NM_173584	Body	chr11:829284-833558	Island			NA	11:829828-831432	Unclassified	TRUE
cg00420510	1.4859	3.2996e-10	9.09551e-09	37	5	1089571	F	SLC12A7	NM_006598	Body	chr5:1087533-1087909	S_Shore			NA			NA
cg00420526	-0.475413	2.71923e-05	0.000281557	37	16	67999966	R	SLC12A4;SLC12A4;SLC12A4;SLC12A4	NM_001145961;NM_001145962;NM_005072;NM_001145964	Body;Body;Body;Body	chr16:68001916-68002462	N_Shore			TRUE			NA
cg00421032	-0.491753	0.000263883	0.00212392	37	4	22493281	R	GPR125	NM_145290	Body					TRUE			NA
cg00421164	0.500929	0.00115341	0.00772928	37	6	7111068	F	RREB1;RREB1;RREB1;RREB1	NM_001003700;NM_001003699;NM_001168344;NM_001003698	5'UTR;5'UTR;5'UTR;5'UTR	chr6:7107075-7109854	S_Shore		RDMR	NA			NA
cg00421173	1.24826	9.26623e-13	4.03073e-11	37	4	140603682	F	MGST2	NM_002413	Body					TRUE			NA
cg00421335	1.74323	1.04688e-15	7.77349e-14	37	2	71206528	F	ANKRD53;ANKRD53	NM_024933;NM_001115116	Body;Body	chr2:71205563-71206529	Island			NA			NA
cg00421693	1.53191	1.51359e-10	4.44064e-09	37	5	118689293	F	TNFAIP8	NM_001077654	Body	chr5:118691401-118691759	N_Shelf			NA			NA
cg00422716	1.36916	1.18161e-08	2.44926e-07	37	7	123484985	R	HYAL4	NM_012269	TSS1500					NA			NA
cg00422932	-1.63748	1.28242e-11	4.55094e-10	37	11	3402000	R	LOC650368	NR_024248	TSS200	chr11:3400155-3400419	S_Shore			NA			NA
cg00422995	1.37092	1.47482e-19	2.36136e-17	37	2	98256494	F								NA			NA
cg00423030	-0.811062	0.00140089	0.00915569	37	17	76037075	R	TNRC6C;TNRC6C	NM_018996;NM_001142640	5'UTR;5'UTR	chr17:76037074-76037323	Island			NA	17:76036732-76037572	Unclassified	TRUE
cg00423398	0.582738	1.68129e-05	0.000182763	37	3	38038969	R	VILL	NM_015873	Body	chr3:38040289-38040535	N_Shore			NA	3:38037502-38039134	Promoter_Associated	NA
cg00423487	0.479362	0.000205208	0.00170077	37	19	4455957	R	UBXN6;UBXN6	NM_025241;NM_001171091	Body;TSS1500	chr19:4457493-4458040	N_Shore		RDMR	TRUE			NA
cg00423704	-0.760957	0.000485522	0.00363359	37	20	21077665	R				chr20:21080929-21082824	N_Shelf			NA			NA
cg00423969	0.707997	0.000101613	0.000915027	37	2	97359879	F	FER1L5;FER1L5	NM_001113382;NM_001077400	Body;TSS1500					NA			NA
cg00424169	1.25941	1.08634e-06	1.52933e-05	37	13	31506837	F	C13orf26;C13orf26	NM_152325;NM_152325	1stExon;5'UTR					NA			NA
cg00425217	1.29873	9.22653e-09	1.9539e-07	37	19	13205470	R	NFIX	NM_002501	3'UTR	chr19:13207375-13207621	N_Shore		RDMR	TRUE	19:13204358-13205559	Unclassified	NA
cg00425636	-0.901711	1.5855e-07	2.63747e-06	37	18	43404545	F	SIGLEC15	NM_213602	TSS1500					NA			NA
cg00425710	0.748175	0.000712311	0.00508078	37	16	56672671	F	MT1A	NM_005946	1stExon	chr16:56671937-56672530	S_Shore			NA			TRUE
cg00425843	2.11952	1.94983e-14	1.15006e-12	37	10	94883021	F								NA			NA
cg00426182	-0.220645	0.00089932	0.00622427	37	6	28072559	R				chr6:28072464-28072926	Island			NA	6:28072129-28073459	Promoter_Associated	NA
cg00426709	3.55184	6.10715e-18	7.02545e-16	37	6	100067930	F				chr6:100066405-100067277	S_Shore			NA	6:100067930-100067966	Unclassified_Cell_type_specific	NA
cg00427150	2.04968	1.88166e-07	3.08594e-06	37	13	114770568	R	RASA3	NM_007368	Body	chr13:114773745-114774499	N_Shelf			NA			NA
cg00427604	1.36374	1.66817e-10	4.8526e-09	37	16	55542751	F	LPCAT2	NM_017839	TSS200	chr16:55542920-55543274	N_Shore			NA			NA
cg00428382	1.736	4.48543e-08	8.32389e-07	37	4	124427390	F				chr4:124426780-124427157	S_Shore		RDMR	TRUE			NA
cg00428457	-2.25372	2.04385e-09	4.86794e-08	37	2	119887680	R								TRUE			NA
cg00428492	0.34671	0.00134415	0.00882916	37	3	112708982	R	GTPBP8;GTPBP8	NM_138485;NM_014170	TSS1500;TSS1500	chr3:112709666-112710270	N_Shore			NA			NA
cg00428526	1.88967	5.56097e-15	3.60889e-13	37	4	7031099	R	TBC1D14;TBC1D14;TBC1D14	NM_001113361;NM_020773;NM_001113363	Body;Body;Body	chr4:7026763-7027166	S_Shelf			NA			NA
cg00428692	0.609021	0.000594845	0.00434109	37	5	194530	R	LRRC14B	NM_001080478	Body	chr5:195087-195323	N_Shore			NA	5:194375-194724	Unclassified_Cell_type_specific	NA
cg00428709	-1.73626	5.14856e-08	9.43514e-07	37	16	51584433	F								TRUE			NA
cg00429107	-0.542186	0.000175989	0.00148507	37	21	45662813	R				chr21:45660557-45663172	Island			NA			NA
cg00429509	-0.455995	0.000996389	0.00680873	37	2	365132	R								NA			NA
cg00430542	1.31523	1.93781e-08	3.84754e-07	37	16	73098732	R				chr16:73099812-73100791	N_Shore		RDMR	TRUE			TRUE
cg00430888	0.355366	0.000557739	0.00410386	37	4	185926063	F				chr4:185926380-185926651	N_Shore			NA	4:185925916-185926896	Unclassified	NA
cg00431114	0.899533	7.00914e-09	1.51484e-07	37	20	43104027	F	TTPAL;TTPAL	NM_024331;NM_001039199	TSS1500;TSS1500	chr20:43104406-43104654	N_Shore			NA	20:43103750-43105321	Promoter_Associated	NA
cg00431565	1.63688	1.5988e-09	3.88279e-08	37	19	3369478	R	NFIC;NFIC	NM_005597;NM_205843	Body;Body	chr19:3369477-3369913	Island			NA			NA
cg00431673	-0.378972	0.000110522	0.000985901	37	8	12974448	R	DLC1;DLC1;DLC1	NM_006094;NM_182643;NM_001164271	Body;Body;TSS1500					NA			NA
cg00431699	1.38063	1.65057e-06	2.23498e-05	37	2	63278831	R	OTX1	NM_014562	5'UTR	chr2:63274475-63279430	Island			NA			NA
cg00431837	-1.16709	7.75123e-05	0.000717965	37	6	107812732	F	SOBP	NM_018013	Body	chr6:107810066-107812733	Island			NA			NA
cg00432262	-0.822358	1.52351e-05	0.000167315	37	7	46400029	F								TRUE			NA
cg00432937	1.2329	2.17854e-05	0.000230719	37	7	100879557	F	CLDN15	NM_014343	Body	chr7:100875555-100876212	S_Shelf			NA			NA
cg00433296	4.73777	1.39299e-31	3.973e-28	37	8	22223852	F	SLC39A14;SLC39A14;SLC39A14;SLC39A14	NM_001135154;NM_015359;NM_001128431;NM_001135153	TSS1500;TSS1500;TSS1500;TSS1500	chr8:22224519-22225244	N_Shore		RDMR	NA			NA
cg00433406	-0.899692	0.000209958	0.00173524	37	1	20616975	F	VWA5B1	NM_001039500	TSS1500					NA			NA
cg00433866	1.30386	4.0163e-08	7.52177e-07	37	6	29623646	F	MOG;MOG;MOG;MOG;MOG;MOG;MOG;MOG;MOG;MOG;MOG	NM_001008229;NM_206811;NM_002433;NM_206813;NM_206809;NM_206812;NM_206810;NM_001170418;NM_001008228;NM_206814;NM_001170417	TSS1500;TSS1500;TSS1500;TSS1500;TSS1500;TSS1500;TSS1500;TSS1500;TSS1500;TSS1500;TSS1500					TRUE			NA
cg00434395	4.04785	4.64779e-30	8.42394e-27	37	11	59518964	F				chr11:59522425-59523303	N_Shelf			NA			NA
cg00434461	0.739648	0.000461637	0.00347936	37	5	92905860	F	FLJ42709;FLJ42709;FLJ42709	NR_021490;NR_021491;NR_015369	Body;Body;Body	chr5:92906239-92908875	N_Shore		RDMR	NA			NA
cg00434573	1.18463	0.000104524	0.000937999	37	19	2041960	F	MKNK2;MKNK2	NM_199054;NM_017572	Body;Body	chr19:2041823-2042593	Island	high-CpG:1992862-1993038		TRUE	19:2041380-2043397	Promoter_Associated	NA
cg00435692	-0.660961	3.67553e-06	4.6308e-05	37	15	71999487	F	THSD4	NM_024817	Body					TRUE			NA
cg00436476	1.92547	1.30606e-05	0.000145734	37	6	26240505	F	HIST1H4F	NM_003540	TSS200	chr6:26240697-26240951	N_Shore			NA	6:26240372-26240619	Promoter_Associated_Cell_type_specific	NA
cg00437124	-0.995525	4.68795e-06	5.76962e-05	37	6	114475951	R								TRUE			NA
cg00438026	0.428453	0.00139551	0.0091245	37	6	31513267	F	ATP6V1G2;NFKBIL1;NFKBIL1;ATP6V1G2	NM_130463;NM_001144962;NM_001144963;NM_138282	Body;TSS1500;TSS1500;Body	chr6:31509668-31509896	S_Shelf			NA			NA
cg00438946	0.972184	1.26944e-10	3.77815e-09	37	6	34215475	F	C6orf1;C6orf1;C6orf1	NM_178508;NM_001008703;NM_001008704	5'UTR;5'UTR;5'UTR	chr6:34216408-34217348	N_Shore			NA	6:34215366-34215597	Unclassified_Cell_type_specific	NA
cg00438952	1.38082	1.01251e-10	3.05969e-09	37	3	177149136	R								TRUE			NA
cg00439261	0.908763	4.1108e-11	1.33164e-09	37	16	75273413	R	BCAR1;BCAR1;BCAR1;BCAR1;BCAR1;BCAR1;BCAR1;BCAR1;BCAR1	NM_001170718;NM_001170719;NM_001170721;NM_001170715;NM_001170720;NM_014567;NM_001170714;NM_001170716;NM_001170717	Body;Body;TSS1500;Body;Body;Body;Body;Body;Body	chr16:75269028-75269879	S_Shelf			NA	16:75272405-75273483	Unclassified	TRUE
cg00439318	1.1777	1.16959e-05	0.000131992	37	16	89601909	F	SPG7;SPG7	NM_003119;NM_199367	Body;Body	chr16:89603563-89603896	N_Shore			NA			NA
cg00439658	0.476654	0.000435499	0.00330624	37	17	72848669	F	GRIN2C	NM_000835	Body	chr17:72848166-72848901	Island			TRUE	17:72848356-72849429	Promoter_Associated_Cell_type_specific	TRUE
cg00439790	2.30342	1.39894e-14	8.45047e-13	37	12	57532315	R	LRP1	NM_002332	Body					TRUE			NA
cg00440032	-2.64253	2.68851e-18	3.31936e-16	37	12	127257679	F								NA			NA
cg00440217	-1.39202	1.73199e-08	3.47185e-07	37	6	71012765	F	COL9A1;COL9A1	NM_001851;NM_001851	5'UTR;1stExon					NA			NA
cg00441434	1.82703	4.68919e-15	3.09329e-13	37	8	26434054	R	DPYSL2	NM_001386	TSS1500	chr8:26434372-26436785	N_Shore			NA			NA
cg00442267	0.432535	0.000494339	0.00369172	37	19	46317840	R	RSPH6A	NM_030785	1stExon	chr19:46318490-46319266	N_Shore			NA	19:46317792-46318030	Unclassified_Cell_type_specific	NA
cg00443673	-0.45643	0.000178338	0.00150278	37	17	38296516	F	CASC3;CASC3	NM_007359;NM_007359	5'UTR;1stExon				RDMR	NA	17:38295898-38297707	Promoter_Associated	NA
cg00444059	1.21437	4.19739e-07	6.41476e-06	37	16	31439672	R	COX6A2;COX6A2	NM_005205;NM_005205	1stExon;5'UTR	chr16:31438891-31439682	Island			NA			NA
cg00445443	-1.63146	5.02584e-05	0.000487549	37	7	27143478	R	HOXA2	NM_006735	TSS1500	chr7:27143181-27143479	Island		CDMR	TRUE			NA
cg00446023	2.40996	1.21496e-19	1.98187e-17	37	11	2880777	F				chr11:2883689-2884461	N_Shelf			NA	11:2880738-2880787	Unclassified_Cell_type_specific	NA
cg00446046	1.839	6.27145e-09	1.36751e-07	37	3	187686918	F								TRUE			NA
cg00446123	1.94013	2.31288e-05	0.000243394	37	20	62367888	R	LIME1	NM_017806	TSS200	chr20:62368955-62371962	N_Shore		CDMR	NA	20:62367587-62368260	Promoter_Associated	NA
cg00446235	0.882012	0.000182094	0.0015307	37	1	161008644	F	TSTD1;TSTD1;TSTD1	NM_001113207;NM_001113205;NM_001113206	Body;Body;Body	chr1:161008377-161008830	Island			NA	1:161008079-161009395	Promoter_Associated	NA
cg00446414	2.13646	1.88427e-10	5.42395e-09	37	8	29387350	R								TRUE	8:29386861-29387757	Unclassified	TRUE
cg00446472	0.930905	4.71569e-05	0.00046086	37	16	89042082	R	CBFA2T3	NM_005187	Body					NA	16:89041875-89042224	Promoter_Associated_Cell_type_specific	NA
cg00446758	0.40523	7.28849e-08	1.2963e-06	37	7	132764863	F	CHCHD3	NM_017812	Body	chr7:132766509-132767096	N_Shore			NA			NA
cg00446763	1.04117	0.0013045	0.00860102	37	3	124625655	R	MUC13	NM_033049	3'UTR					NA			NA
cg00446803	0.375735	2.49377e-05	0.0002605	37	8	144814058	R	FAM83H	NM_198488	5'UTR	chr8:144815203-144816518	N_Shore			NA	8:144813469-144814390	Unclassified	NA
cg00446900	0.790731	2.24154e-05	0.000236638	37	10	129717806	F	PTPRE	NM_006504	5'UTR			low-CpG:129607731-129607802		NA			NA
cg00447110	-0.736318	0.000287475	0.00229115	37	19	51645522	R	SIGLEC7;SIGLEC7	NM_016543;NM_014385	TSS200;TSS200					NA			NA
cg00447208	0.465236	0.000654371	0.00471834	37	17	76126301	F	TMC8;TMC6;TMC6	NM_152468;NM_007267;NM_001127198	TSS1500;5'UTR;TSS1500	chr17:76127521-76128406	N_Shore			NA			NA
cg00447277	1.04854	9.50024e-08	1.65325e-06	37	17	3558808	R	CTNS;CTNS	NM_001031681;NM_004937	Body;Body					NA			NA
cg00447582	0.390311	8.69649e-05	0.00079626	37	16	569849	F	RAB11FIP3;RAB11FIP3	NM_014700;NM_001142272	Body;Body					NA	16:569704-570219	Unclassified_Cell_type_specific	NA
cg00448300	-0.631214	1.69639e-06	2.29215e-05	37	2	132205917	R				chr2:132202265-132203257	S_Shelf			NA			NA
cg00448707	0.56139	2.91535e-08	5.59479e-07	37	1	68512928	F	DIRAS3	NM_004675	Body	chr1:68512643-68513005	Island			NA			NA
cg00448752	0.979382	1.28639e-05	0.000143737	37	1	101775370	R								TRUE	1:101774424-101775802	Promoter_Associated	NA
cg00448875	0.774874	1.62541e-05	0.000177342	37	3	133611626	F	RAB6B	NM_016577	Body	chr3:133613566-133615174	N_Shore			NA			NA
cg00448889	1.14935	4.53027e-11	1.45515e-09	37	15	60714492	F	NARG2;NARG2	NM_001018089;NM_024611	3'UTR;3'UTR					TRUE			NA
cg00449067	-0.542623	0.00147168	0.00954815	37	2	188269443	F	CALCRL	NM_005795	5'UTR					TRUE			NA
cg00449201	-1.10222	7.17317e-05	0.000669715	37	19	50193437	F	CPT1C;CPT1C;C19orf76	NM_152359;NM_001136052;NM_001101340	TSS1500;TSS1500;Body	chr19:50193020-50194798	Island			NA	19:50192245-50194371	Promoter_Associated	NA
cg00449930	-0.654829	0.00096267	0.00660933	37	16	69555896	R								TRUE			NA
cg00450015	1.21067	2.4832e-07	3.9709e-06	37	2	120193766	R	TMEM37	NM_183240	Body	chr2:120190030-120190308	S_Shelf			NA			NA
cg00450425	1.58776	1.25438e-13	6.37672e-12	37	1	116189098	R	VANGL1	NM_138959	5'UTR	chr1:116184380-116185561	S_Shelf			NA			NA
cg00450651	2.02831	3.28808e-20	6.08943e-18	37	5	139485902	R				chr5:139486931-139487672	N_Shore		RDMR	NA			NA
cg00451105	1.27273	7.72061e-06	9.06642e-05	37	13	29104082	F				chr13:29105411-29105676	N_Shore			NA			NA
cg00451413	0.731751	6.30243e-11	1.97613e-09	37	3	141654247	R								NA			NA
cg00451491	0.483587	0.000687231	0.00492367	37	2	157528744	F								TRUE			NA
cg00451807	0.728556	1.98238e-09	4.7315e-08	37	10	81460453	R				chr10:81460423-81460743	Island			NA			NA
cg00452039	-0.899122	1.48906e-05	0.000163924	37	7	151571753	F	PRKAG2	NM_016203	Body	chr7:151572761-151575106	N_Shore			NA			NA
cg00452270	-0.90343	9.85722e-06	0.000112996	37	1	145015987	R	PDE4DIP	NM_022359	Body					TRUE			NA
cg00452755	-0.393764	0.000240779	0.00195895	37	1	28864993	R	SNHG3-RCC1;RCC1;RCC1;RCC1;SNHG3-RCC1;SNHG3-RCC1	NR_030725;NM_001269;NM_001048194;NM_001048195;NR_030726;NM_001048199	Body;3'UTR;3'UTR;3'UTR;Body;3'UTR					NA	1:28864910-28865124	Gene_Associated_Cell_type_specific	NA
cg00453202	0.567113	8.88008e-06	0.000102806	37	16	85482380	F								TRUE	16:85482351-85482708	Unclassified_Cell_type_specific	NA
cg00453258	0.663088	0.000744925	0.00528356	37	10	105219172	F	CALHM1	NM_001001412	TSS1500	chr10:105217966-105218287	S_Shore			NA	10:105218747-105219420	Unclassified_Cell_type_specific	NA
cg00453349	-0.272717	0.00135567	0.00889683	37	2	110371869	R	SEPT10;ANKRD57;SEPT10	NM_144710;NM_023016;NM_178584	TSS200;TSS200;TSS200	chr2:110370906-110373301	Island			NA			NA
cg00453735	1.95183	4.13856e-08	7.73226e-07	37	10	33321730	F								TRUE			TRUE
cg00453808	-0.387328	0.0013336	0.00876878	37	19	44116206	R	ZNF428;SRRM5	NM_182498;NM_001145641	Body;TSS200					NA			NA
cg00453938	1.18484	6.23198e-06	7.47039e-05	37	20	39320532	R				chr20:39321289-39321647	N_Shore		RDMR	TRUE	20:39320441-39320571	Unclassified_Cell_type_specific	NA
cg00454274	-1.70541	4.78029e-09	1.06574e-07	37	1	54200587	F	GLIS1	NM_147193	TSS1500	chr1:54203402-54205310	N_Shelf			TRUE			NA
cg00454719	1.42135	5.6158e-11	1.77531e-09	37	13	37453500	R	SMAD9;SMAD9	NM_001127217;NM_005905	Body;Body					NA			NA
cg00454862	-1.52725	1.34098e-07	2.26433e-06	37	1	192983012	F								TRUE			NA
cg00455178	-0.288209	1.07803e-06	1.51851e-05	37	11	14913981	R	CYP2R1	NM_024514	TSS1500	chr11:14912900-14913771	S_Shore			NA	11:14913413-14914093	Promoter_Associated	NA
cg00455796	-0.403501	0.00118047	0.00788717	37	19	11475827	R	LPPR2;LPPR2	NM_001170635;NM_022737	3'UTR;3'UTR	chr19:11471905-11472299	S_Shelf			NA			NA
cg00456216	0.797736	1.70481e-08	3.42191e-07	37	1	27427064	R	SLC9A1	NM_003047	Body					NA			NA
cg00456299	0.574509	6.09322e-06	7.31868e-05	37	1	22677736	R								TRUE			NA
cg00456326	0.686599	0.000401373	0.00307719	37	2	19560467	F				chr2:19560963-19561650	N_Shore		RDMR	NA			NA
cg00456672	1.24315	3.09269e-09	7.13396e-08	37	15	62358751	F	C2CD4A	NM_207322	TSS1500	chr15:62359827-62360995	N_Shore			NA			NA
cg00456892	2.01124	2.00117e-05	0.000213551	37	11	124629925	R	ESAM	NM_138961	Body	chr11:124629723-124629926	Island			NA	11:124629168-124630264	Unclassified	NA
cg00457195	-0.651856	3.98444e-05	0.000396455	37	20	61979272	R	CHRNA4	NM_000744	Body	chr20:61979255-61979573	Island			NA			NA
cg00458564	-1.65251	6.6332e-10	1.72879e-08	37	13	114847039	F	RASA3	NM_007368	Body	chr13:114849000-114852746	N_Shore			NA			NA
cg00458927	-1.03047	0.000462705	0.00348669	37	2	62116573	R	CCT4	NM_006430	TSS1500	chr2:62115445-62115990	S_Shore			NA			NA
cg00458932	0.88432	0.000140974	0.00122178	37	2	208199465	F								TRUE	2:208199311-208199541	Unclassified_Cell_type_specific	TRUE
cg00458949	0.931272	1.46252e-08	2.97334e-07	37	1	23942134	R				chr1:23945941-23946295	N_Shelf			NA			NA
cg00459623	2.81055	6.80958e-17	6.35754e-15	37	2	176936581	F				chr2:176936246-176936809	Island		DMR	NA			NA
cg00459683	-1.31895	6.78371e-15	4.32591e-13	37	1	200182426	F	FAM58B	NM_001105517	TSS1500					NA			NA
cg00459909	-0.620628	1.83201e-05	0.000197269	37	2	44065720	R	ABCG8;ABCG5	NM_022437;NM_022436	TSS1500;1stExon					NA			NA
cg00459997	-1.51637	2.56388e-10	7.19242e-09	37	12	130621721	F				chr12:130623142-130623492	N_Shore			TRUE			NA
cg00460589	-1.09184	9.64944e-07	1.37364e-05	37	6	13274354	R	PHACTR1	NM_030948	Body					NA			NA
cg00460691	-0.74946	7.39988e-05	0.000688784	37	6	65779514	R	EYS	NM_001142800	Body					NA			NA
cg00460789	1.84149	2.423e-07	3.88423e-06	37	16	88960261	F	CBFA2T3;CBFA2T3	NM_175931;NM_005187	Body;Body	chr16:88961748-88961965	N_Shore			NA	16:88960027-88960265	Unclassified_Cell_type_specific	NA
cg00460795	-1.89497	4.23263e-17	4.12248e-15	37	2	119998072	F	STEAP3;STEAP3;STEAP3	NM_182915;NM_001008410;NM_018234	Body;5'UTR;5'UTR					TRUE			TRUE
cg00461311	-1.69519	2.35775e-11	7.97066e-10	37	12	109460299	R	SVOP	NM_018711	TSS1500					NA			NA
cg00461578	1.57882	7.39482e-14	3.91591e-12	37	4	146819333	R	ZNF827	NM_178835	Body					TRUE			NA
cg00461612	1.29179	6.11801e-06	7.34564e-05	37	2	223158076	R	PAX3;PAX3;PAX3;PAX3;PAX3;PAX3	NM_181458;NM_181461;NM_181459;NM_181460;NM_181457;NM_001127366	Body;Body;Body;Body;Body;Body	chr2:223159725-223160487	N_Shore		RDMR	TRUE			NA
cg00462104	0.842009	3.29783e-07	5.14822e-06	37	6	52628844	R	GSTA2	NM_000846	TSS1500					NA			NA
cg00462362	0.833963	1.8349e-06	2.46258e-05	37	19	55591148	R	EPS8L1;EPS8L1	NM_017729;NM_133180	TSS1500;Body	chr19:55591433-55591644	N_Shore			NA			NA
cg00462430	-1.24497	3.05073e-10	8.45118e-09	37	1	232608508	R	SIPA1L2	NM_020808	Body					TRUE			NA
cg00462700	0.943982	6.71062e-08	1.20222e-06	37	10	134021845	R	STK32C	NM_173575	Body	chr10:134019500-134019776	S_Shelf			NA			NA
cg00462951	-1.84636	1.04115e-09	2.61798e-08	37	12	5539736	R				chr12:5539895-5540703	N_Shore			NA	12:5539724-5540373	Unclassified_Cell_type_specific	NA
cg00463004	0.36556	0.000147267	0.00126987	37	6	107938738	R	SOBP	NM_018013	Body					TRUE			NA
cg00463202	-0.678719	0.000274913	0.00220166	37	13	114107710	R	ADPRHL1	NM_138430	1stExon					NA			NA
cg00463491	-1.7107	6.84771e-08	1.22431e-06	37	3	177914725	F								TRUE			NA
cg00463746	-0.486358	2.87109e-05	0.000295615	37	1	64434320	R	ROR1;ROR1	NM_005012;NM_001083592	Body;Body					TRUE			NA
cg00464046	1.20514	4.43636e-06	5.48781e-05	37	7	134854551	R	C7orf49;C7orf49;C7orf49	NR_024185;NR_024186;NM_024033	Body;Body;5'UTR	chr7:134854975-134855696	N_Shore			NA			TRUE
cg00464095	0.702077	0.0001153	0.00102346	37	8	38008630	R	STAR;STAR	NM_000349;NM_001007243	TSS200;TSS200					NA			NA
cg00464796	-1.28867	8.29033e-08	1.45826e-06	37	15	53852614	F	WDR72	NM_182758	Body					TRUE			NA
cg00464814	-0.78283	7.66978e-06	9.01088e-05	37	6	16758889	F	ATXN1;ATXN1	NM_001128164;NM_000332	5'UTR;5'UTR	chr6:16760178-16762985	N_Shore			NA			NA
cg00465247	2.33536	7.29916e-09	1.57277e-07	37	13	50703477	F				chr13:50703685-50705025	N_Shore		CDMR	NA	13:50702745-50703962	Unclassified_Cell_type_specific	NA
cg00465319	-1.2903	2.64392e-09	6.16679e-08	37	3	123339568	R	MYLK;MYLK;MYLK;MYLK;MYLK;MYLK	NM_053032;NM_053028;NM_053025;NM_053027;NM_053031;NM_053026	TSS200;Body;Body;Body;TSS200;Body					NA			NA
cg00466116	2.99427	9.58415e-19	1.29077e-16	37	1	59221344	F								TRUE	1:59220970-59221465	Unclassified_Cell_type_specific	TRUE
cg00466334	1.89387	1.58361e-17	1.67959e-15	37	1	119532850	F	TBX15	NM_152380	TSS1500	chr1:119531991-119532196	S_Shore			NA			NA
cg00466402	0.516237	3.76502e-05	0.000377116	37	1	205423263	R				chr1:205424829-205426556	N_Shore			NA			NA
cg00466425	0.813654	1.54057e-05	0.00016899	37	6	30856491	F	DDR1;DDR1;DDR1;DDR1	NM_013994;NM_013994;NM_013993;NM_001954	5'UTR;1stExon;5'UTR;5'UTR	chr6:30852102-30852676	S_Shelf			NA			TRUE
cg00466839	0.505345	0.000336268	0.00263294	37	4	3500688	F				chr4:3502380-3502611	N_Shore			NA	4:3500667-3500817	Unclassified_Cell_type_specific	NA
cg00467553	1.17036	4.55254e-13	2.0959e-11	37	9	38391432	R	ALDH1B1	NM_000692	TSS1500	chr9:38392509-38393187	N_Shore			NA			NA
cg00467592	-1.3458	1.08878e-09	2.72933e-08	37	6	168616391	R				chr6:168613132-168613346	S_Shelf			NA			NA
cg00468091	-0.67357	3.11108e-09	7.17231e-08	37	11	28111111	F	KIF18A	NM_031217	Body					TRUE			NA
cg00468125	0.918795	8.02054e-08	1.41532e-06	37	10	134046066	R	STK32C	NM_173575	Body					NA	10:134045674-134046124	Unclassified_Cell_type_specific	TRUE
cg00468228	-1.00408	1.04105e-05	0.000118711	37	8	67092562	F				chr8:67089249-67089962	S_Shelf			NA			NA
cg00469015	2.06457	2.7032e-11	9.0522e-10	37	15	69744684	R	RPLP1;RPLP1	NM_213725;NM_001003	TSS1500;TSS1500	chr15:69745049-69745746	N_Shore			NA	15:69744354-69745991	Promoter_Associated	NA
cg00470051	0.69261	9.39123e-05	0.000852806	37	6	168683006	R				chr6:168684602-168684934	N_Shore			NA			NA
cg00470636	-0.913239	7.88397e-06	9.2391e-05	37	8	26440349	R	DPYSL2	NM_001386	Body	chr8:26434372-26436785	S_Shelf			NA			NA
cg00470641	1.15566	7.2826e-08	1.2953e-06	37	10	3096219	R								TRUE			NA
cg00470786	0.443791	0.000753124	0.00533382	37	2	18740679	R	RDH14	NM_020905	Body	chr2:18741356-18741964	N_Shore			NA			NA
cg00470817	1.37296	1.63798e-18	2.12008e-16	37	12	6741882	R	LPAR5;LPAR5	NM_020400;NM_001142961	5'UTR;TSS1500					TRUE	12:6741421-6741919	Promoter_Associated	NA
cg00471190	1.35252	4.79803e-06	5.89159e-05	37	16	3115809	R	IL32;IL32;IL32;IL32;IL32;IL32;IL32;IL32;IL32	NM_001012631;NM_001012636;NM_001012632;NM_001012636;NM_001012635;NM_001012633;NM_004221;NM_001012634;NM_001012718	5'UTR;1stExon;5'UTR;5'UTR;5'UTR;5'UTR;5'UTR;5'UTR;5'UTR					TRUE	16:3115360-3115819	Promoter_Associated_Cell_type_specific	TRUE
cg00471368	2.47316	3.38852e-17	3.36626e-15	37	16	81817629	R	PLCG2	NM_002661	5'UTR	chr16:81812710-81813707	S_Shelf			NA			NA
cg00472277	-0.766048	0.000377612	0.00291739	37	11	2327755	R	TSPAN32	NM_139022	Body					TRUE	11:2327233-2327898	Promoter_Associated	TRUE
cg00472281	0.933452	1.10796e-09	2.7724e-08	37	5	1205496	R	SLC6A19	NM_001003841	Body	chr5:1207045-1207529	N_Shore			TRUE			NA
cg00472373	0.834645	5.69854e-05	0.000545411	37	3	9833414	R	ARPC4;TADA3;ARPC4;ARPC4;TADA3	NM_001024960;NM_133480;NM_005718;NM_001024959;NM_006354	TSS1500;5'UTR;TSS1500;TSS1500;5'UTR	chr3:9833992-9834985	N_Shore			NA			NA
cg00472801	-0.768718	5.71247e-06	6.90222e-05	37	6	62995876	R	KHDRBS2;KHDRBS2	NM_152688;NM_152688	1stExon;5'UTR	chr6:62995855-62996228	Island		DMR	NA			NA
cg00473384	-0.200977	0.00142423	0.00928605	37	20	17550438	R	DSTN;DSTN	NM_001011546;NM_006870	TSS200;TSS200	chr20:17550330-17551317	Island			NA			NA
cg00473702	1.50856	1.62482e-09	3.94151e-08	37	9	136443547	R				chr9:136444127-136444604	N_Shore			NA			NA
cg00473769	1.5723	3.8036e-16	3.08927e-14	37	16	88569151	R	ZFPM1	NM_153813	Body	chr16:88569267-88569491	N_Shore			NA			NA
cg00474017	-3.56641	6.23011e-17	5.84867e-15	37	13	114074435	F								NA			NA
cg00474031	-1.6413	9.32027e-11	2.83307e-09	37	8	133494101	F	KCNQ3	NM_004519	TSS1500	chr8:133492398-133493586	S_Shore			NA			NA
cg00474854	1.72595	3.55349e-15	2.39327e-13	37	18	11821776	F	GNAL;GNAL;GNAL	NM_001142339;NM_182978;NM_002071	Body;Body;Body	chr18:11821868-11822207	N_Shore			NA			NA
cg00475131	-1.90326	3.75491e-08	7.07022e-07	37	19	41117096	R	LTBP4;LTBP4;LTBP4	NM_001042545;NM_001042544;NM_003573	Body;Body;Body	chr19:41119031-41120394	N_Shore	low-CpG:45808933-45808944		NA			NA
cg00476243	4.90466	2.49605e-20	4.74544e-18	37	7	150023	R				chr7:149494-150038	Island			TRUE	7:148904-150565	Promoter_Associated	NA
cg00476430	-0.532941	0.0012735	0.00842441	37	8	81947741	R	PAG1	NM_018440	5'UTR					TRUE			NA
cg00476608	1.91223	3.17736e-12	1.25593e-10	37	12	7044787	F	ATN1;ATN1	NM_001940;NM_001007026	Body;Body	chr12:7046237-7047257	N_Shore			NA			NA
cg00476617	1.51549	4.69481e-10	1.25991e-08	37	10	18492374	R	CACNB2;CACNB2;CACNB2;CACNB2;CACNB2;CACNB2	NM_201571;NM_201593;NM_201597;NM_201572;NM_201596;NM_001167945	Body;Body;Body;Body;Body;Body					TRUE			NA
cg00476900	0.846042	1.06255e-05	0.000120952	37	20	47659742	F				chr20:47662732-47663449	N_Shelf			NA			NA
cg00477557	-0.401161	6.56974e-05	0.000619618	37	2	132229728	R				chr2:132233606-132234085	N_Shelf			NA			NA
cg00478390	0.647946	1.31892e-05	0.000147029	37	7	150703765	R	NOS3	NM_000603	Body	chr7:150705759-150706129	N_Shore			NA			NA
cg00478710	-0.656334	0.000883769	0.00613214	37	3	133392965	F				chr3:133393118-133393657	N_Shore			NA			NA
cg00479463	2.02882	8.46453e-07	1.21811e-05	37	19	33726786	R				chr19:33726654-33726946	Island			NA	19:33725529-33727226	Unclassified	NA
cg00479912	0.820218	1.30342e-05	0.000145464	37	16	79472241	F								TRUE			NA
cg00480298	1.72652	5.19144e-10	1.38038e-08	37	17	44068857	R	MAPT;MAPT;MAPT;MAPT;MAPT;MAPT	NM_016835;NM_001123067;NM_016834;NM_005910;NM_001123066;NM_016841	Body;Body;Body;Body;Body;Body			low-CpG:41424665-41424724		NA			NA
cg00480381	-0.838327	0.000342409	0.00267594	37	16	7382796	R	A2BP1;A2BP1;A2BP1;A2BP1;A2BP1;A2BP1;A2BP1;A2BP1;A2BP1	NM_001142334;NM_145893;NM_001142333;NM_145891;NM_145891;NM_145892;NM_145893;NM_145892;NM_018723	Body;5'UTR;Body;1stExon;5'UTR;1stExon;1stExon;5'UTR;Body					NA			NA
cg00481280	1.03398	3.59558e-10	9.84486e-09	37	18	56118290	F	MIR122	NR_029667	TSS200					NA			NA
cg00482162	1.51019	1.46024e-07	2.44776e-06	37	2	109896312	R	SH3RF3	NM_001099289	Body					TRUE			NA
cg00482488	3.3478	3.54866e-18	4.2828e-16	37	17	70216332	R								TRUE			NA
cg00482996	1.07441	1.72294e-10	5.00087e-09	37	2	11793323	F				chr2:11796850-11797236	N_Shelf			NA			NA
cg00483030	1.0959	8.55162e-06	9.93784e-05	37	17	77810509	R	CBX4	NM_003655	Body	chr17:77812016-77812276	N_Shore			NA			TRUE
cg00483304	1.55274	1.1796e-10	3.5262e-09	37	2	64976962	R				chr2:64978121-64978924	N_Shore			NA			NA
cg00483503	-0.350039	0.00150018	0.00970664	37	17	42084612	R	NAGS	NM_153006	Body	chr17:42082027-42084972	Island			NA	17:42083972-42085563	Promoter_Associated	NA
cg00483562	-0.610895	0.000700655	0.00500622	37	5	1931781	F				chr5:1930754-1931986	Island		DMR	NA			NA
cg00483640	-1.24128	9.19747e-10	2.33344e-08	37	6	2623483	R	C6orf195	NM_152554	3'UTR					NA			NA
cg00483992	1.27198	7.97391e-07	1.15316e-05	37	1	35449536	F				chr1:35450649-35451037	N_Shore			NA			NA
cg00484711	1.5121	2.4524e-13	1.18187e-11	37	2	42331922	F				chr2:42328300-42328827	S_Shelf			TRUE			NA
cg00485312	0.881442	7.44417e-06	8.76957e-05	37	7	4875094	F	RADIL	NM_018059	Body	chr7:4874104-4875095	Island			NA			NA
cg00486352	-2.55936	3.54756e-16	2.89574e-14	37	10	126139435	F	NKX1-2	NM_001146340	TSS1500	chr10:126135809-126138896	S_Shore			NA			NA
cg00486915	1.93123	6.06359e-10	1.59091e-08	37	3	152877614	F				chr3:152878268-152881086	N_Shore			NA			NA
cg00487155	0.698172	9.23932e-06	0.000106532	37	16	87740757	R	LOC100129637	NR_024488	TSS1500	chr16:87741910-87742152	N_Shore			NA	16:87740638-87740956	Unclassified_Cell_type_specific	NA
cg00487187	2.25172	2.34512e-09	5.52451e-08	37	10	94451625	R	HHEX	NM_002729	Body	chr10:94451329-94451737	Island		RDMR	NA	10:94451326-94451933	Promoter_Associated	NA
cg00487506	-0.750862	0.00147233	0.00955192	37	8	143692935	R	ARC	NM_015193	3'UTR	chr8:143694430-143696166	N_Shore			NA			NA
cg00487737	1.54661	2.82605e-05	0.000291574	37	19	11689726	F	ACP5;ACP5;ACP5;ACP5;ACP5;ACP5	NM_001611;NM_001111036;NM_001111036;NM_001111034;NM_001111035;NM_001111035	TSS1500;5'UTR;1stExon;TSS200;5'UTR;1stExon	chr19:11689417-11689768	Island			TRUE	19:11688874-11690044	Promoter_Associated	NA
cg00487780	-0.515548	4.65441e-06	5.73232e-05	37	19	41816298	R	CCDC97	NM_052848	Body	chr19:41816025-41816350	Island	high-CpG:46507872-46508276		NA	19:41815663-41816578	Promoter_Associated	NA
cg00487831	-0.403926	0.000142503	0.00123348	37	16	67073948	F	CBFB;CBFB	NM_022845;NM_001755	Body;Body					TRUE			NA
cg00487989	-1.84288	2.09622e-11	7.15472e-10	37	16	89688244	R	DPEP1;DPEP1	NM_001128141;NM_004413	5'UTR;5'UTR					NA			NA
cg00488514	0.659277	0.000644144	0.0046548	37	22	26877690	F	HPS4	NM_022081	Body	chr22:26879458-26879930	N_Shore			NA	22:26877589-26877822	Unclassified_Cell_type_specific	NA
cg00489652	0.788034	0.000714234	0.00509284	37	12	7281783	R	CLSTN3;RBP5	NM_014718;NM_031491	TSS1500;TSS1500					NA			NA
cg00490004	-2.6219	8.92114e-16	6.7148e-14	37	3	74666148	R				chr3:74663506-74664121	S_Shelf			NA			NA
cg00490606	1.74769	1.77928e-12	7.37172e-11	37	8	102217748	F	ZNF706;ZNF706;ZNF706;ZNF706;ZNF706;ZNF706	NM_001042510;NM_001042511;NM_001042511;NM_016096;NM_001042510;NM_016096	5'UTR;5'UTR;1stExon;5'UTR;1stExon;1stExon	chr8:102217317-102218461	Island	high-CpG:102286726-102287178		NA	8:102217618-102218349	Promoter_Associated	NA
cg00491021	-1.37777	2.03529e-06	2.70649e-05	37	8	42064880	F	PLAT;PLAT	NM_033011;NM_000930	5'UTR;5'UTR					TRUE			NA
cg00491064	2.27136	7.9878e-08	1.40979e-06	37	11	19681786	R	NAV2	NM_001111018	Body					TRUE	11:19681706-19681923	Unclassified_Cell_type_specific	TRUE
cg00491577	-2.17935	6.10862e-10	1.60149e-08	37	2	24712329	F				chr2:24713710-24715168	N_Shore			NA			NA
cg00492070	-1.02181	2.17132e-06	2.87146e-05	37	3	107810716	F	CD47;CD47;CD47	NM_198793;NM_001025079;NM_001777	TSS1500;TSS1500;TSS1500	chr3:107809375-107810543	S_Shore			NA			NA
cg00492341	-1.23437	5.13974e-08	9.42111e-07	37	1	2526950	R	MMEL1	NM_033467	Body	chr1:2527239-2527503	N_Shore			NA			NA
cg00492362	1.52319	1.74838e-10	5.06821e-09	37	2	95788963	R	MRPS5	NM_031902	TSS1500	chr2:95787089-95787951	S_Shore			NA			NA
cg00492574	-3.13877	4.34009e-19	6.26737e-17	37	9	110248385	F	KLF4	NM_004235	Body	chr9:110249748-110252660	N_Shore		CDMR	NA			NA
cg00493242	0.513378	9.44327e-06	0.000108657	37	4	20660098	R								TRUE			NA
cg00493363	1.82509	8.35249e-12	3.07084e-10	37	7	106619774	R								TRUE			NA
cg00493554	1.83913	5.43468e-14	2.94836e-12	37	20	43926595	R	MATN4;MATN4;MATN4	NM_030592;NM_030590;NM_003833	Body;Body;Body	chr20:43926594-43927171	Island			NA			NA
cg00493609	1.63641	6.63373e-06	7.90619e-05	37	16	13704393	R								TRUE			NA
cg00493617	-1.35851	5.1036e-08	9.36243e-07	37	2	6141445	F								TRUE			NA
cg00494183	4.00476	9.74291e-28	9.81036e-25	37	13	21645350	F								TRUE			NA
cg00494544	2.74396	9.29234e-18	1.03255e-15	37	3	195268648	R	PPP1R2	NM_006241	Body	chr3:195269553-195270363	N_Shore			NA			NA
cg00494710	1.7304	2.94625e-19	4.42051e-17	37	2	27633183	F	PPM1G;PPM1G	NM_002707;NM_177983	TSS1500;TSS1500	chr2:27631884-27632822	S_Shore			NA	2:27631813-27633260	Promoter_Associated	NA
cg00495201	2.10908	3.71052e-19	5.445e-17	37	5	137825623	R				chr5:137827399-137828201	N_Shore			NA			NA
cg00495303	2.70004	8.043e-14	4.23331e-12	37	18	3771110	F	DLGAP1;DLGAP1	NM_001003809;NM_004746	Body;Body	chr18:3771354-3771571	N_Shore			NA	18:3770969-3771985	Unclassified	NA
cg00495305	1.60882	2.1433e-14	1.25473e-12	37	3	43659797	R	ANO10	NM_018075	5'UTR	chr3:43663169-43663484	N_Shelf			NA			NA
cg00495574	0.703017	4.85434e-06	5.95303e-05	37	4	943597	F	TMEM175	NM_032326	Body	chr4:940613-941057	S_Shelf			NA			NA
cg00495658	1.28824	4.10166e-07	6.27975e-06	37	10	48417904	R	GDF2	NM_016204	TSS1500	chr10:48413741-48413968	S_Shelf			NA			NA
cg00495811	1.04453	1.91705e-06	2.56321e-05	37	16	55619692	F	LPCAT2	NM_017839	3'UTR					NA			NA
cg00496026	0.707196	0.00149957	0.0097034	37	10	102766610	R	LZTS2	NM_032429	Body	chr10:102766321-102766693	Island			NA			NA
cg00496961	1.10461	4.08031e-05	0.000404898	37	11	102638706	F								NA			NA
cg00496967	1.37251	1.59136e-21	3.89301e-19	37	17	15371256	R	CDRT4	NM_173622	TSS1500					NA			NA
cg00497078	1.24406	7.91148e-10	2.03259e-08	37	14	105045187	R	C14orf180	NM_001008404	TSS1500	chr14:105041307-105041561	S_Shelf			NA			NA
cg00497909	-0.607174	0.000167957	0.00142499	37	7	65610409	R	CRCP;CRCP;CRCP;CRCP;CRCP	NM_001040648;NR_024548;NM_014478;NM_001142414;NM_001040647	Body;Body;Body;Body;Body					TRUE	7:65610298-65610439	Gene_Associated_Cell_type_specific	NA
cg00498360	0.602042	0.000101908	0.000917326	37	17	64504304	R	PRKCA	NM_002737	Body					TRUE			NA
cg00498401	1.49725	1.8378e-14	1.08759e-12	37	17	74024829	R	EVPL	NM_001988	TSS1500					NA			NA
cg00498816	2.10222	2.01875e-07	3.29286e-06	37	3	13665022	F	FBLN2;FBLN2;FBLN2	NM_001165035;NM_001998;NM_001004019	Body;Body;Body					NA			NA
cg00499237	1.12681	7.52293e-08	1.33496e-06	37	2	97169033	R	NEURL3	NR_026875	Body	chr2:97166208-97166660	S_Shelf			NA	2:97168960-97169114	Unclassified_Cell_type_specific	NA
cg00499290	-0.482069	0.00140545	0.00918181	37	4	47428108	F	GABRB1	NM_000812	3'UTR	chr4:47427692-47427905	S_Shore			NA			NA
cg00499509	1.21849	3.30391e-08	6.28047e-07	37	1	149605515	R	LOC728855	NR_024510	Body	chr1:149605514-149605903	Island			NA			TRUE
cg00499539	2.14024	1.50958e-26	1.13164e-23	37	2	113960266	R	PSD4;LOC440839	NM_012455;NR_029399	3'UTR;Body	chr2:113956343-113957042	S_Shelf			NA			NA
cg00499700	0.678989	0.000407487	0.00311843	37	5	76116088	F	F2RL1	NM_005242	Body	chr5:76115510-76116089	Island		RDMR	NA			NA
cg00499707	0.8376	0.00024251	0.00197151	37	20	34679665	R				chr20:34680003-34681001	N_Shore			NA			NA
cg00499822	1.8915	2.35431e-12	9.53073e-11	37	10	44881551	F	CXCL12;CXCL12;CXCL12	NM_000609;NM_001033886;NM_199168	TSS1500;TSS1500;TSS1500	chr10:44879714-44882391	Island			NA			NA
cg00500048	-1.43517	1.26014e-08	2.59461e-07	37	20	44097563	R	WFDC2	NM_006103	TSS1500	chr20:44098280-44099536	N_Shore		CDMR	NA			NA
cg00500140	1.29708	3.9902e-09	9.01158e-08	37	2	691012	R								NA			NA
cg00500227	1.57829	1.44785e-15	1.04948e-13	37	10	70169555	F				chr10:70166206-70167342	S_Shelf			NA			NA
cg00500359	1.57532	4.62897e-08	8.5677e-07	37	11	3175625	R	OSBPL5;OSBPL5;OSBPL5	NM_020896;NM_001144063;NM_145638	5'UTR;5'UTR;5'UTR					NA			NA
cg00500498	0.828646	4.70315e-05	0.000459745	37	6	169653935	R	THBS2	NM_003247	5'UTR			low-CpG:169395833-169396142		TRUE			TRUE
cg00500540	-0.612366	8.10981e-05	0.000747782	37	16	56394104	R				chr16:56397824-56398026	N_Shelf			NA			NA
cg00500602	-0.630928	0.000654335	0.00471816	37	16	2105310	R	TSC2;TSC2;TSC2	NM_001077183;NM_000548;NM_001114382	Body;Body;Body	chr16:2105014-2105390	Island			NA			NA
cg00501366	0.761824	3.01932e-06	3.87491e-05	37	17	7992476	F	ALOX12B	NM_001139	TSS1500					NA			NA
cg00501774	0.588587	2.10688e-05	0.000223784	37	9	125132660	F	PTGS1;PTGS1	NM_080591;NM_000962	TSS1500;TSS1500					NA	9:125132611-125132909	Unclassified_Cell_type_specific	NA
cg00502597	1.5304	7.14797e-16	5.49373e-14	37	1	60197222	F	FGGY;FGGY	NM_018291;NM_001113411	Body;Body					TRUE			NA
cg00502746	0.645467	1.14337e-05	0.000129308	37	11	1715993	R	HCCA2	NM_053005	Body	chr11:1715761-1716002	Island			NA			NA
cg00502926	0.691216	0.00135799	0.00890929	37	14	21510056	F	RNASE7	NM_032572	TSS1500					NA			NA
cg00503017	-1.85734	2.38573e-14	1.38584e-12	37	10	79151564	F	KCNMA1;KCNMA1;KCNMA1;KCNMA1	NM_001161353;NM_001161352;NM_002247;NM_001014797	Body;Body;Body;Body					TRUE	10:79151508-79152567	Unclassified	TRUE
cg00503447	0.952677	2.19906e-08	4.31895e-07	37	6	26180928	F				chr6:26184036-26184336	N_Shelf			NA			NA
cg00503731	0.902775	3.04061e-06	3.89966e-05	37	7	12723327	F				chr7:12726156-12727248	N_Shelf			NA			NA
cg00503866	1.21862	1.43063e-06	1.96344e-05	37	1	39546656	R	MACF1	NM_012090	TSS1500	chr1:39547013-39547959	N_Shore			NA			TRUE
cg00503998	0.721223	7.0307e-09	1.51926e-07	37	8	145625814	R	CPSF1;MIR1234	NM_013291;NR_031600	Body;TSS1500	chr8:145621585-145621891	S_Shelf			NA			NA
cg00504226	2.68334	4.07255e-19	5.91876e-17	37	21	45344525	F	AGPAT3;AGPAT3	NM_020132;NM_001037553	5'UTR;TSS1500					TRUE			NA
cg00504569	-0.626574	0.000482146	0.00361243	37	10	63697267	F	ARID5B	NM_032199	Body					TRUE			NA
cg00504599	-0.663329	0.000112844	0.00100452	37	17	79428036	F	BAHCC1	NM_001080519	Body	chr17:79427930-79429135	Island			NA			NA
cg00504902	1.79977	2.89091e-14	1.65208e-12	37	6	29692183	R	HLA-F;HLA-F;HLA-F	NM_001098478;NM_001098479;NM_018950	Body;Body;Body	chr6:29691106-29692093	S_Shore			TRUE			TRUE
cg00505318	4.01908	1.09707e-27	1.09923e-24	37	3	69130918	R	UBA3;UBA3	NM_198195;NM_003968	TSS1500;TSS1500	chr3:69129058-69129515	S_Shore			NA			NA
cg00505606	-0.682931	0.000730634	0.00519384	37	1	3620638	F	TP73;TP73;TP73;TP73	NM_001126240;NM_005427;NM_001126242;NM_001126241	Body;Body;Body;Body	chr1:3623318-3623521	N_Shelf			NA	1:3620617-3620851	Unclassified_Cell_type_specific	TRUE
cg00506168	3.2862	6.45575e-26	4.10847e-23	37	21	45148460	F	PDXK	NM_003681	Body	chr21:45148454-45149262	Island		DMR	TRUE	21:45148017-45149547	Promoter_Associated	NA
cg00506250	-0.482894	5.33565e-07	7.98085e-06	37	3	60747416	R	FHIT;FHIT	NM_001166243;NM_002012	5'UTR;5'UTR					TRUE			NA
cg00506299	-0.683771	4.60755e-06	5.67958e-05	37	3	16469127	R	RFTN1	NM_015150	Body					TRUE			TRUE
cg00506935	1.65539	9.26305e-14	4.82749e-12	37	15	89169262	R	AEN	NM_022767	5'UTR					NA			NA
cg00507477	1.13301	1.94577e-08	3.86203e-07	37	15	90292483	R				chr15:90293221-90294733	N_Shore		RDMR	NA	15:90292379-90292797	Unclassified_Cell_type_specific	NA
cg00508131	0.77861	1.12151e-05	0.000127061	37	16	333153	F	PDIA2;PDIA2	NM_006849;NM_006849	5'UTR;1stExon	chr16:334444-334764	N_Shore			NA	16:333087-333881	Unclassified_Cell_type_specific	NA
cg00509007	-0.388189	0.000284469	0.00226941	37	11	1781557	R	HCCA2;CTSD	NM_053005;NM_001909	Body;Body	chr11:1784805-1785553	N_Shelf			NA	11:1780732-1781615	Unclassified_Cell_type_specific	TRUE
cg00509108	1.01976	1.06159e-06	1.49763e-05	37	16	56672074	F	MT1A	NM_005946	TSS1500	chr16:56671937-56672530	Island		RDMR	NA	16:56671813-56672429	Unclassified_Cell_type_specific	TRUE
cg00509187	1.86042	3.61614e-11	1.18277e-09	37	13	44362093	R	ENOX1	NM_017993	TSS1500	chr13:44359858-44361696	S_Shore		CDMR	NA	13:44361634-44363077	Unclassified_Cell_type_specific	NA
cg00509451	-0.803312	0.000257973	0.00208205	37	11	64811775	F	SAC3D1	NM_013299	Body	chr11:64815040-64815722	N_Shelf			NA			NA
cg00509610	-0.56072	1.07951e-06	1.5204e-05	37	3	12528629	R	TSEN2;TSEN2;TSEN2;TSEN2;TSEN2	NM_001145395;NM_001145392;NM_025265;NM_001145393;NM_001145394	5'UTR;5'UTR;5'UTR;5'UTR;5'UTR	chr3:12525749-12526346	S_Shelf			NA			NA
cg00509670	2.14648	2.32964e-09	5.49263e-08	37	14	37130313	R	PAX9	NM_006194	5'UTR	chr14:37131181-37132785	N_Shore		RDMR	NA			NA
cg00509772	-0.629466	0.000105265	0.000943914	37	20	32273129	F	E2F1	NM_005225	Body	chr20:32273557-32274505	N_Shore			NA	20:32272778-32275021	Promoter_Associated	NA
cg00509898	0.338807	0.000113811	0.0010122	37	16	49894167	F				chr16:49888474-49893354	S_Shore			NA			NA
cg00512454	0.746906	0.00098787	0.00675754	37	6	36709214	F	CPNE5	NM_020939	3'UTR					NA			NA
cg00512484	-1.0839	0.00113617	0.00762916	37	18	5199989	R				chr18:5196243-5197389	S_Shelf			NA			NA
cg00512563	2.57775	5.15407e-27	4.45307e-24	37	16	87398040	R	FBXO31;FBXO31	NR_024568;NM_024735	Body;Body					TRUE	16:87397872-87398154	Unclassified_Cell_type_specific	TRUE
cg00513208	1.70591	2.94116e-12	1.16902e-10	37	10	12085641	R	UPF2;UPF2	NM_015542;NM_080599	TSS1500;TSS1500	chr10:12084236-12085431	S_Shore		CDMR	NA	10:12084071-12085781	Promoter_Associated	NA
cg00513316	-0.990699	7.07133e-05	0.000661433	37	15	78632109	F	CRABP1	NM_004378	TSS1500	chr15:78632669-78633108	N_Shore			NA			NA
cg00513564	-0.745945	7.16984e-07	1.04593e-05	37	13	44388673	R								TRUE			NA
cg00513735	-1.29528	1.85169e-10	5.33809e-09	37	5	176307766	F	UNC5A	NM_133369	3'UTR	chr5:176304965-176305166	S_Shelf			NA	5:176307566-176307864	Unclassified_Cell_type_specific	NA
cg00513941	4.55875	2.79673e-28	3.15207e-25	37	19	42437245	R				chr19:42437218-42437432	Island			NA			NA
cg00513952	-0.538774	0.00140949	0.00920376	37	16	57351118	R								TRUE			NA
cg00513981	0.597313	0.000114728	0.0010192	37	7	5642784	F	FSCN1	NM_003088	Body	chr7:5642948-5643184	N_Shore			NA			NA
cg00513984	0.714105	7.59305e-05	0.00070477	37	12	125039177	F				chr12:125039119-125039344	Island			NA			NA
cg00514241	1.5366	3.19086e-07	4.99596e-06	37	22	28193910	R	MN1	NM_002430	1stExon	chr22:28192793-28198592	Island			NA			NA
cg00514609	-0.776224	0.00137489	0.00900422	37	11	111783348	F	CRYAB;HSPB2	NM_001885;NM_001541	TSS1500;TSS200					TRUE			NA
cg00514723	1.82217	3.06171e-16	2.53107e-14	37	20	40244770	R	CHD6	NM_032221	5'UTR	chr20:40246345-40247841	N_Shore		RDMR	NA	20:40244756-40244909	Promoter_Associated_Cell_type_specific	NA
cg00515161	-0.280743	0.00149651	0.00968641	37	17	59940900	F	BRIP1	NM_032043	TSS200	chr17:59940825-59941067	Island			NA	17:59940161-59941563	Promoter_Associated	NA
cg00516092	0.962481	3.14868e-06	4.02333e-05	37	20	31177275	R				chr20:31170740-31173640	S_Shelf			NA			TRUE
cg00516271	1.10345	1.84993e-11	6.37763e-10	37	15	31615092	R				chr15:31617763-31620908	N_Shelf			NA			NA
cg00517849	-0.439458	0.00125646	0.00832529	37	4	183373496	F	ODZ3	NM_001080477	Body	chr4:183369276-183370459	S_Shelf			NA			NA
cg00518190	2.93764	3.06756e-16	2.53517e-14	37	1	6294768	F	ICMT	NM_012405	Body	chr1:6295528-6296261	N_Shore		CDMR	NA			NA
cg00518276	-0.862116	1.96077e-05	0.000209684	37	11	106148020	F								TRUE			NA
cg00519208	-1.8862	2.89929e-08	5.5671e-07	37	1	93258319	F	EVI5	NM_005665	TSS1500					TRUE			NA
cg00520380	0.476437	0.000295335	0.00234695	37	22	31643997	R	LIMK2;LIMK2;LIMK2	NM_016733;NM_005569;NM_001031801	TSS1500;Body;TSS1500					TRUE	22:31643888-31644592	Unclassified_Cell_type_specific	TRUE
cg00520933	0.66565	0.000575361	0.00421664	37	10	31607160	F	ZEB1;ZEB1;ZEB1;LOC220930;ZEB1	NM_030751;NR_024285;NR_024287;NR_024284;NR_024286	TSS1500;TSS1500;TSS1500;Body;TSS1500	chr10:31607227-31610094	N_Shore			NA	10:31606956-31607526	Promoter_Associated	TRUE
cg00521399	0.826288	8.21965e-05	0.000756763	37	22	20003152	F	ARVCF	NM_001670	5'UTR	chr22:20003521-20004695	N_Shore			NA			NA
cg00521428	0.781866	1.55012e-08	3.13626e-07	37	1	16534579	F	ARHGEF19	NM_153213	Body	chr1:16532917-16534580	Island			NA	1:16534322-16534695	Unclassified_Cell_type_specific	NA
cg00522048	-1.007	0.000196748	0.00163878	37	10	121172431	R	GRK5	NM_005308	Body					TRUE			TRUE
cg00522231	-3.26717	1.62691e-26	1.20629e-23	37	2	9549277	R	ITGB1BP1;ITGB1BP1	NM_004763;NM_022334	Body;Body					NA			NA
cg00522333	1.97018	1.00344e-12	4.34078e-11	37	20	25036597	F	ACSS1	NM_032501	Body	chr20:25037707-25039211	N_Shore			NA			NA
cg00522451	0.7645	0.000787399	0.0055469	37	2	113464048	R								NA	2:113463787-113464087	Unclassified_Cell_type_specific	TRUE
cg00522588	-0.60262	0.000821438	0.00575458	37	12	49449063	R	MLL2	NM_003482	1stExon					NA			NA
cg00524220	1.5712	1.44675e-09	3.54051e-08	37	19	3098963	R	GNA11	NM_002067	Body	chr19:3097564-3097793	S_Shore			NA	19:3098473-3099549	Unclassified_Cell_type_specific	TRUE
cg00524374	-0.731662	8.60514e-05	0.000788728	37	10	3894968	F								TRUE	10:3894579-3895067	Unclassified_Cell_type_specific	TRUE
cg00524443	1.21873	0.000116554	0.00103333	37	17	46650310	R	HOXB3	NM_002146	5'UTR	chr17:46654053-46654369	N_Shelf			TRUE			NA
cg00524561	0.933165	1.91335e-08	3.80287e-07	37	12	125197665	R								NA			NA
cg00524900	-1.51523	3.16026e-09	7.27706e-08	37	5	118609965	R	TNFAIP8	NM_001077654	Body					TRUE			NA
cg00525392	1.56958	3.37736e-12	1.33085e-10	37	18	19744123	R				chr18:19744936-19752363	N_Shore			NA	18:19744011-19744197	Unclassified_Cell_type_specific	NA
cg00525597	0.397244	0.000934532	0.00643978	37	1	973595	R	AGRN	NM_198576	Body	chr1:975496-980305	N_Shore			NA			NA
cg00525681	1.52348	2.33488e-15	1.62932e-13	37	13	88329151	R	SLITRK5	NM_015567	Body	chr13:88329394-88329885	N_Shore		RDMR	NA			NA
cg00525722	0.633985	1.18354e-05	0.000133377	37	2	112280286	R								TRUE			NA
cg00525823	1.06092	0.000216103	0.00178017	37	18	11148510	F	FAM38B	NM_022068	Body	chr18:11148307-11149936	Island			NA			NA
cg00526336	2.10939	3.1148e-16	2.57028e-14	37	1	230415902	R	GALNT2	NM_004481	3'UTR	chr1:230415342-230415689	S_Shore			NA			NA
cg00526455	1.07541	9.71853e-06	0.000111569	37	19	19285099	R	LOC729991-MEF2B;LOC729991-MEF2B;LOC729991-MEF2B	NR_027308;NM_005919;NR_027307	Body;5'UTR;Body	chr19:19280998-19281560	S_Shelf			NA			NA
cg00526835	0.974085	1.79118e-05	0.000193358	37	10	93335140	R	LOC100188947	NR_024467	Body					NA			NA
cg00528191	0.725155	0.00012837	0.00112481	37	1	33235717	F	KIAA1522	NM_020888	Body	chr1:33235494-33235718	Island			NA	1:33235521-33235757	Unclassified_Cell_type_specific	NA
cg00529371	-4.2379	3.68117e-30	6.82361e-27	37	2	242735324	R	GAL3ST2	NM_022134	Body					NA			NA
cg00529757	0.844521	0.000495531	0.00369987	37	6	32136052	R	AGPAT1;AGPAT1;EGFL8	NM_032741;NM_006411;NM_030652	3'UTR;3'UTR;3'UTR	chr6:32134460-32135196	S_Shore			NA			NA
cg00530414	1.44253	1.32221e-08	2.71269e-07	37	16	18800193	R	RPS15A;RPS15A	NM_001019;NM_001030009	Body;Body	chr16:18801251-18801866	N_Shore		RDMR	NA			NA
cg00530688	0.650844	0.00152536	0.00984595	37	12	107974554	R	BTBD11;BTBD11	NM_001017523;NM_001018072	TSS200;Body	chr12:107974842-107975305	N_Shore			NA			NA
cg00530825	-1.2797	1.84742e-10	5.32779e-09	37	4	114918128	F								TRUE			NA
cg00531789	0.784604	0.000834058	0.00583267	37	6	36927248	F	PI16	NM_153370	Body	chr6:36926928-36927262	Island			NA			NA
cg00531865	0.557294	9.70735e-05	0.000878441	37	16	30841666	R				chr16:30845650-30846194	N_Shelf			NA			NA
cg00532411	0.61491	0.000101389	0.000913176	37	1	6241506	R	CHD5	NM_015557	TSS1500	chr1:6239237-6240814	S_Shore			TRUE	1:6240324-6241720	Unclassified	NA
cg00533183	2.0855	1.82869e-17	1.91511e-15	37	6	32810742	F	PSMB8;PSMB8	NM_004159;NM_148919	Body;Body	chr6:32811494-32811839	N_Shore			NA			NA
cg00533390	1.53829	8.827e-11	2.69291e-09	37	1	245028657	F	HNRNPU;HNRNPU	NM_031844;NM_004501	TSS1500;TSS1500	chr1:245026434-245028020	S_Shore			NA			NA
cg00533649	1.27026	8.81045e-14	4.60515e-12	37	19	42431930	R				chr19:42431916-42432376	Island			NA			NA
cg00533749	1.4607	1.99288e-15	1.4085e-13	37	1	9992130	R	LZIC	NM_032368	Body					NA	1:9992050-9992244	Gene_Associated_Cell_type_specific	NA
cg00533827	0.487494	0.00104841	0.00711719	37	2	86163827	F								TRUE			NA
cg00533891	-1.14399	2.63843e-08	5.10516e-07	37	10	80919242	R	ZMIZ1	NM_020338	5'UTR					TRUE			TRUE
cg00533990	0.458616	0.000589273	0.00430536	37	18	3255878	F	MYL12A	NM_006471	Body					TRUE			NA
cg00534318	1.03135	1.65929e-11	5.76806e-10	37	3	129032826	R				chr3:129033540-129035646	N_Shore			NA	3:129031593-129033028	Promoter_Associated	NA
cg00536366	-0.84672	1.93263e-05	0.000206903	37	22	40052857	R	CACNA1I;CACNA1I	NM_001003406;NM_021096	Body;Body				RDMR	TRUE	22:40052749-40053485	Promoter_Associated	NA
cg00536472	-0.61437	1.85843e-05	0.000199803	37	18	73000758	R	TSHZ1	NM_005786	3'UTR	chr18:72999650-73000088	S_Shore			NA			NA
cg00536532	0.639685	0.000596686	0.00435336	37	6	33561449	F	C6orf227	NR_027908	TSS1500	chr6:33560892-33561189	S_Shore			NA	6:33560263-33561550	Unclassified	NA
cg00536745	1.54439	2.76805e-09	6.43864e-08	37	7	128428030	F				chr7:128430707-128432003	N_Shelf			NA			NA
cg00536792	0.80556	0.00112236	0.00754923	37	6	53530503	F	KLHL31;KLHL31	NM_001003760;NM_001003760	1stExon;5'UTR					NA			NA
cg00536924	-0.976709	0.000166234	0.00141249	37	7	93551004	F	GNG11	NM_004126	TSS200					NA			NA
cg00537673	0.907828	1.02709e-11	3.70621e-10	37	6	43141823	R	SRF	NM_003131	Body	chr6:43142013-43142217	N_Shore			NA	6:43141390-43142921	Promoter_Associated	NA
cg00538695	0.70401	3.6039e-08	6.80504e-07	37	5	176520502	F	FGFR4;FGFR4;FGFR4	NM_022963;NM_213647;NM_002011	Body;Body;Body	chr5:176520157-176520622	Island			NA			NA
cg00538717	1.06894	4.90726e-09	1.09135e-07	37	6	34123544	R				chr6:34122475-34122949	S_Shore			NA	6:34122117-34123645	Unclassified	NA
cg00538923	0.785653	0.000168192	0.00142663	37	17	74536011	F	PRCD	NM_001077620	TSS200	chr17:74533281-74534566	S_Shore			NA	17:74535986-74536122	Unclassified_Cell_type_specific	NA
cg00540067	1.44377	4.61897e-11	1.48178e-09	37	3	126074344	F	KLF15	NM_014079	5'UTR	chr3:126074783-126076865	N_Shore			NA			NA
cg00540363	0.724835	2.22234e-05	0.000234827	37	2	109757749	F	SH3RF3	NM_001099289	Body					TRUE			NA
cg00540593	1.16262	8.78887e-09	1.86722e-07	37	20	61977814	R	CHRNA4	NM_000744	3'UTR	chr20:61978015-61978294	N_Shore			NA			NA
cg00540819	-0.632835	0.0014891	0.00964503	37	10	134803507	F				chr10:134804221-134804448	N_Shore			NA			NA
cg00541303	-1.13877	0.000467599	0.00351785	37	1	208962374	F								TRUE			NA
cg00541544	2.22617	8.13779e-13	3.57764e-11	37	22	39150255	F	UNC84B	NM_015374	5'UTR	chr22:39151457-39152476	N_Shore			NA			NA
cg00542096	0.291762	0.000778693	0.00549278	37	10	118646037	R	KIAA1598;KIAA1598	NM_001127211;NM_018330	Body;3'UTR					NA			NA
cg00542261	-2.06814	4.06149e-20	7.38099e-18	37	10	71121415	R	HK1;HK1;HK1;HK1;HK1	NM_033500;NM_000188;NM_033498;NM_033497;NM_033496	Body;Body;Body;Body;Body					TRUE			NA
cg00542880	-0.793879	1.26741e-09	3.13416e-08	37	9	97765043	F	C9orf3	NM_032823	Body	chr9:97766649-97767955	N_Shore			NA			NA
cg00542975	-1.19939	6.23733e-05	0.000591344	37	2	122392291	R	CLASP1;CLASP1;CLASP1	NM_015282;NM_001142274;NM_001142273	5'UTR;5'UTR;5'UTR					TRUE			NA
cg00543073	2.47946	2.23537e-13	1.08619e-11	37	2	60773386	F	BCL11A;BCL11A;BCL11A	NM_022893;NM_138559;NM_018014	Body;Body;Body	chr2:60776596-60778157	N_Shelf			TRUE			NA
cg00543474	1.00456	1.08649e-06	1.52948e-05	37	10	134260981	R	C10orf91	NM_173541	Body					TRUE	10:134260247-134262214	Promoter_Associated_Cell_type_specific	TRUE
cg00543840	-1.64179	1.49063e-10	4.37731e-09	37	1	22213376	F	HSPG2	NM_005529	Body	chr1:22213902-22214119	N_Shore			NA			NA
cg00544901	-0.262353	0.000286028	0.00228056	37	19	49999417	F	RPS11	NM_001015	TSS1500	chr19:49999252-49999839	Island			NA	19:49999122-49999833	Promoter_Associated	NA
cg00545229	-1.14343	8.44303e-07	1.21535e-05	37	4	15429531	R	C1QTNF7;C1QTNF7;C1QTNF7	NM_031911;NM_001135170;NM_001135171	TSS200;Body;5'UTR					TRUE			NA
cg00545918	-0.658466	0.00109654	0.00739752	37	20	61951483	R	COL20A1	NM_020882	Body	chr20:61951346-61951549	Island			NA			NA
cg00545966	0.825361	0.000539527	0.00398655	37	16	67701244	R	C16orf86;C16orf48	NM_001012984;NM_032140	Body;TSS1500	chr16:67700009-67701354	Island			TRUE	16:67701164-67701372	Promoter_Associated	NA
cg00546897	1.53531	1.3033e-05	0.000145457	37	21	45232232	R	LOC284837	NR_026961	Body					NA			NA
cg00547103	1.0073	0.000965288	0.00662418	37	4	159092089	F	FAM198B;FAM198B;FAM198B	NM_001031700;NM_001128424;NM_016613	Body;Body;Body					TRUE	4:159091601-159092250	Unclassified_Cell_type_specific	NA
cg00547143	0.962475	2.45541e-08	4.77937e-07	37	11	68450618	F	GAL	NM_015973	TSS1500	chr11:68451359-68452846	N_Shore			TRUE			NA
cg00547425	1.42877	5.29259e-12	2.01695e-10	37	6	31829960	F	NEU1	NM_000434	Body	chr6:31830299-31830948	N_Shore			NA	6:31829892-31831092	Promoter_Associated	NA
cg00547768	0.909488	3.71105e-05	0.000372295	37	1	205713088	R	NUCKS1	NM_022731	Body					TRUE			NA
cg00548098	3.27297	4.32549e-16	3.47714e-14	37	16	11295667	R								TRUE			TRUE
cg00548911	0.929449	0.000193881	0.00161725	37	17	33788026	R				chr17:33787401-33787845	S_Shore			NA	17:33787247-33788214	Unclassified	NA
cg00549018	0.495361	0.00123519	0.00820331	37	19	48968137	F	KCNJ14;KCNJ14	NM_170720;NM_013348	3'UTR;3'UTR	chr19:48965002-48965792	S_Shelf			NA			NA
cg00549219	0.624058	2.01957e-07	3.29369e-06	37	5	177370476	R				chr5:177370962-177371612	N_Shore			NA			NA
cg00549412	0.884136	8.75985e-07	1.25728e-05	37	21	43933482	F	SLC37A1	NM_018964	5'UTR	chr21:43933589-43934832	N_Shore			NA	21:43933463-43934833	Promoter_Associated_Cell_type_specific	TRUE
cg00549475	0.84899	0.00031413	0.00247938	37	17	10632715	F	TMEM220	NM_001004313	Body	chr17:10632789-10633490	N_Shore			NA	17:10632631-10633545	Promoter_Associated	NA
cg00550080	1.18306	3.03783e-09	7.01932e-08	37	6	30124792	F	TRIM10;TRIM10	NM_006778;NM_052828	Body;Body					NA			NA
cg00550493	-0.590925	0.000145464	0.00125597	37	6	64928665	F	EYS	NM_001142800	Body					TRUE			NA
cg00550955	1.45924	1.14194e-09	2.85138e-08	37	22	22012657	R				chr22:22011565-22012516	S_Shore			NA	22:22011063-22012798	Promoter_Associated	NA
cg00551088	1.74922	8.16612e-09	1.7441e-07	37	2	128158047	R				chr2:128158437-128158912	N_Shore			NA			NA
cg00551954	-0.35058	5.94277e-05	0.000566434	37	5	1054113	F	SLC12A7	NM_006598	Body	chr5:1054619-1054880	N_Shore			NA			NA
cg00552318	0.804405	3.5277e-06	4.45956e-05	37	22	41633632	R	CHADL	NM_138481	Body	chr22:41633520-41634842	Island			TRUE	22:41633558-41633914	Promoter_Associated_Cell_type_specific	TRUE
cg00552696	2.44397	2.10293e-13	1.02692e-11	37	10	29195190	F								TRUE			NA
cg00553149	1.53195	3.87269e-05	0.000386647	37	7	99775558	R	STAG3;STAG3;GPC2	NM_012447;NM_012447;NM_152742	1stExon;5'UTR;TSS1500	chr7:99774733-99775583	Island	high-CpG:99613314-99613542		NA	7:99774737-99775599	Promoter_Associated	NA
cg00553833	0.768179	6.25844e-05	0.000593084	37	1	29447700	R	TMEM200B	NM_001003682	Body	chr1:29447699-29451847	Island			NA			NA
cg00554068	0.829482	0.000292236	0.00232455	37	5	150462395	R	TNIP1	NM_006058	TSS1500	chr5:150460086-150460864	S_Shore			NA	5:150461670-150462405	Promoter_Associated	NA
cg00554165	-0.987491	1.53765e-10	4.50183e-09	37	5	172536348	R	C5orf41	NM_153607	Body					TRUE			NA
cg00554173	1.8816	4.85865e-17	4.66176e-15	37	20	3149777	F	ProSAPiP1	NM_014731	TSS1500	chr20:3148649-3149060	S_Shore			NA			NA
cg00554250	-0.85857	7.30051e-05	0.000680545	37	11	47281370	R	NR1H3;NR1H3;NR1H3	NM_001130102;NM_005693;NM_001130101	5'UTR;Body;Body					NA	11:47280884-47281525	Unclassified	TRUE
cg00554421	0.701781	4.41766e-06	5.46717e-05	37	7	1513368	F	INTS1	NM_001080453	Body	chr7:1513775-1514052	N_Shore			NA	7:1513238-1514799	Gene_Associated	NA
cg00554631	0.954534	0.000536701	0.00396876	37	4	155340841	F	DCHS2	NM_001142552	Body	chr4:155337896-155338253	S_Shelf			NA			NA
cg00555456	-4.51642	4.10513e-20	7.43819e-18	37	7	96745696	F	ACN9	NM_020186	TSS1500	chr7:96746767-96747190	N_Shore			NA			NA
cg00555816	1.77011	1.23473e-11	4.39416e-10	37	13	113584082	R								NA			NA
cg00555905	0.612374	0.00032449	0.00255219	37	17	79140481	R	AATK;LOC388428	NM_001080395;NR_027255	TSS1500;Body	chr17:79139501-79140028	S_Shore			NA	17:79138916-79140697	Unclassified_Cell_type_specific	NA
cg00556112	-0.405783	0.00084707	0.00591047	37	11	637173	R	DRD4	NM_000797	TSS200	chr11:636906-640628	Island			TRUE	11:636735-638506	Unclassified_Cell_type_specific	NA
cg00556408	0.447037	0.00138091	0.00903993	37	22	37500588	R	TMPRSS6	NM_153609	TSS1500					NA			NA
cg00557021	0.394573	1.3108e-05	0.000146227	37	19	1203149	F				chr19:1205368-1207422	N_Shelf			NA			NA
cg00557175	-0.753891	0.000692503	0.00495579	37	18	44626898	R	KATNAL2	NM_031303	Body					TRUE	18:44626564-44627086	Unclassified_Cell_type_specific	NA
cg00557402	-0.782338	0.00117163	0.00783659	37	11	114466517	F	FAM55D;FAM55D	NM_017678;NM_001077639	TSS200;TSS200					NA			NA
cg00557630	0.888897	9.56664e-06	0.000109951	37	19	51017123	R	ASPDH;ASPDH;ASPDH	NM_001114598;NM_001114598;NM_001024656	5'UTR;1stExon;Body	chr19:51020296-51022796	N_Shelf			NA			TRUE
cg00557872	-0.728803	0.000426436	0.00324638	37	4	164909730	R	2001-03-01	NM_001166373	5'UTR					TRUE			NA
cg00558500	-0.526136	0.00151393	0.00978293	37	7	63772811	R	LOC728927	NM_001170905	TSS1500					NA			NA
cg00559001	1.29483	3.17655e-07	4.97699e-06	37	5	17366028	R								TRUE			NA
cg00559249	0.933653	4.46337e-07	6.78341e-06	37	5	131831244	F				chr5:131832355-131832801	N_Shore			NA	5:131831217-131833093	Promoter_Associated	NA
cg00559963	-0.367655	9.40296e-05	0.000853719	37	1	40424484	F	MFSD2A;MFSD2A	NM_001136493;NM_032793	Body;Body	chr1:40420487-40421366	S_Shelf			NA			NA
cg00559992	0.970741	0.000783471	0.00552266	37	5	67581342	F	PIK3R1	NM_181523	Body	chr5:67584213-67584451	N_Shelf			NA			NA
cg00560689	-0.800844	2.23246e-08	4.37843e-07	37	1	2883706	F				chr1:2885062-2885284	N_Shore			NA			NA
cg00561287	1.48118	7.58724e-15	4.79855e-13	37	1	150230177	R	CA14	NM_012113	TSS200					TRUE			NA
cg00561527	1.17962	0.000696706	0.00498219	37	19	14193398	R				chr19:14191987-14192772	S_Shore			NA	19:14193388-14193401	Unclassified_Cell_type_specific	NA
cg00561854	-1.27052	4.87793e-05	0.000474804	37	2	30253548	R								TRUE			NA
cg00562070	-1.13962	6.14925e-07	9.08846e-06	37	12	131484689	F	GPR133	NM_198827	Body					NA			NA
cg00562107	-1.21188	6.04154e-08	1.09093e-06	37	11	37532293	F								TRUE			NA
cg00562118	-0.64176	0.000706278	0.0050421	37	4	644805	R	PDE6B;PDE6B	NM_000283;NM_001145291	Body;Body	chr4:645236-645579	N_Shore			NA			NA
cg00562598	0.443094	0.000632918	0.00458473	37	17	8311594	F								NA			NA
cg00562916	-0.636953	7.25417e-06	8.56877e-05	37	2	120543351	F	PTPN4	NM_002830	5'UTR					TRUE			NA
cg00563031	1.9149	1.0429e-08	2.18326e-07	37	5	119782696	F								TRUE			NA
cg00563107	1.21228	0.000765764	0.00541159	37	4	141173528	F				chr4:141173834-141174567	N_Shore			TRUE			NA
cg00563495	1.63687	1.01974e-07	1.76218e-06	37	15	74489089	F	STRA6;STRA6;STRA6;STRA6;STRA6	NM_001142620;NM_001142618;NM_001142619;NM_022369;NM_001142617	Body;Body;Body;Body;Body					NA			TRUE
cg00563566	-0.986228	1.32318e-09	3.2614e-08	37	1	230883182	R	CAPN9;CAPN9;CAPN9;CAPN9	NM_016452;NM_016452;NM_006615;NM_006615	1stExon;5'UTR;1stExon;5'UTR					NA			NA
cg00563768	1.46363	2.32376e-07	3.73881e-06	37	17	34174170	F	TAF15;TAF15	NM_003487;NM_139215	3'UTR;3'UTR					NA			NA
cg00563932	0.547047	0.000185117	0.00155303	37	9	139871049	F	PTGDS	NM_000954	TSS1500	chr9:139872237-139873143	N_Shore			NA	9:139871010-139871250	Unclassified_Cell_type_specific	NA
cg00565882	1.73197	1.54611e-07	2.57867e-06	37	2	38300707	R	CYP1B1	NM_000104	Body	chr2:38301276-38304518	N_Shore			NA			NA
cg00566209	0.710859	0.000462926	0.00348795	37	2	716389	F								TRUE			NA
cg00566320	2.29422	9.39893e-16	7.03805e-14	37	1	32172204	F				chr1:32169537-32169869	S_Shelf			NA			NA
cg00566899	-0.889555	3.08252e-06	3.94719e-05	37	1	216058191	F	USH2A	NM_206933	Body					NA			NA
cg00567132	0.33992	0.00014846	0.00127886	37	22	42337681	R	CENPM;CENPM;CENPM	NM_001110215;NM_001002876;NM_024053	TSS1500;Body;Body					NA	22:42336865-42338316	Promoter_Associated	NA
cg00567211	2.61435	5.29581e-16	4.18375e-14	37	5	95413871	R	MIR583	NR_030309	TSS1500					NA			NA
cg00567542	1.10395	2.51632e-10	7.0687e-09	37	6	53826994	R								TRUE			NA
cg00567703	-3.72782	7.11904e-16	5.47562e-14	37	12	54413101	F	HOXC4;HOXC5;HOXC6	NM_014620;NR_003084;NM_153693	5'UTR;Body;5'UTR	chr12:54412990-54413346	Island			NA	12:54413052-54413269	Unclassified_Cell_type_specific	NA
cg00567922	-0.369833	0.000272496	0.00218445	37	8	73856157	R								NA	8:73855794-73857043	Unclassified	NA
cg00567930	0.684176	4.11504e-05	0.000407857	37	1	2250796	R				chr1:2249315-2249634	S_Shore			NA			NA
cg00568910	1.48251	1.75598e-08	3.51406e-07	37	1	43429380	F								TRUE	1:43429379-43429598	Unclassified_Cell_type_specific	TRUE
cg00569418	0.641375	1.91228e-05	0.000204956	37	19	50192100	F	C19orf76;C19orf76	NM_001101340;NM_001101340	1stExon;5'UTR	chr19:50192499-50192802	N_Shore			TRUE			NA
cg00569447	0.53542	0.0007622	0.00538959	37	5	50695224	R				chr5:50694984-50695352	Island		DMR	NA			NA
cg00569813	1.8893	4.81179e-11	1.53903e-09	37	8	8483549	R								TRUE			TRUE
cg00570000	0.756608	0.000151374	0.00130048	37	1	118728226	R	SPAG17	NM_206996	TSS1500	chr1:118727816-118728097	S_Shore			TRUE			NA
cg00571819	0.805381	0.000107285	0.000960174	37	9	133455886	R	LOC100272217;FUBP3	NR_027440;NM_003934	TSS1500;Body	chr9:133454629-133455496	S_Shore			NA			NA
cg00571870	2.2513	4.48278e-15	2.9701e-13	37	6	109349597	F	SESN1	NM_014454	Body					NA			NA
cg00572089	1.93592	3.24384e-07	5.07306e-06	37	12	33750494	R								TRUE			NA
cg00572504	1.23084	1.1189e-09	2.79745e-08	37	2	86017927	R	ATOH8	NM_032827	3'UTR					NA			NA
cg00572843	0.779814	0.000390502	0.00300412	37	17	1955100	R	MIR212	NR_029625	TSS1500	chr17:1952919-1962328	Island			NA	17:1954748-1955565	Unclassified_Cell_type_specific	NA
cg00573235	0.923175	1.20171e-06	1.676e-05	37	16	56883532	R								TRUE			NA
cg00573352	0.752217	3.78185e-05	0.000378561	37	10	35754300	R	CCNY;CCNY	NM_145012;NM_181698	Body;5'UTR					TRUE			NA
cg00573410	-1.0237	0.000369611	0.00286268	37	2	879464	R								NA			NA
cg00573584	-0.933263	4.39661e-06	5.44492e-05	37	1	165564752	F				chr1:165567265-165567530	N_Shelf			NA			NA
cg00573623	0.724811	0.000216982	0.00178681	37	12	3724731	R	EFCAB4B	NM_001144958	Body					TRUE			NA
cg00574278	1.7436	3.41004e-15	2.30389e-13	37	16	89735878	R	C16orf55	NM_153025	Body	chr16:89734985-89735189	S_Shore			NA			NA
cg00574742	-0.858785	0.000217863	0.00179262	37	5	2223624	F								NA			NA
cg00574913	0.529323	0.000417137	0.0031838	37	20	13761579	R	ESF1	NM_016649	Body	chr20:13765166-13765909	N_Shelf			NA			NA
cg00575003	2.92205	1.09825e-18	1.4665e-16	37	1	217261949	R	ESRRG;ESRRG;ESRRG	NM_206594;NM_206595;NM_001134285	5'UTR;5'UTR;5'UTR	chr1:217262998-217263214	N_Shore			TRUE			NA
cg00575127	0.561968	0.00100393	0.00685451	37	19	18718742	F	CRLF1	NM_004750	TSS1500	chr19:18716229-18718743	Island			NA			NA
cg00575135	-0.503941	1.51153e-06	2.06233e-05	37	16	2174255	R	PKD1;PKD1	NM_001009944;NM_000296	Body;Body	chr16:2177128-2177329	N_Shelf			NA			NA
cg00575665	1.70903	9.08358e-07	1.29912e-05	37	20	39315211	R	MAFB;MAFB	NM_005461;NM_005461	3'UTR;1stExon	chr20:39316039-39316322	N_Shore			NA			NA
cg00575672	2.35911	3.21125e-11	1.06072e-09	37	4	100644171	R								TRUE			NA
cg00575744	0.698353	0.000109831	0.000980574	37	6	32908642	R	HLA-DMB;HLA-DMB	NM_002118;NM_002118	1stExon;5'UTR					TRUE	6:32908496-32909716	Unclassified	TRUE
cg00576886	0.868119	2.1736e-13	1.05902e-11	37	3	39221962	F				chr3:39222280-39222670	N_Shore			NA	3:39221669-39223242	Unclassified	NA
cg00576967	-0.872214	3.70909e-05	0.000372144	37	1	200640177	F	DDX59	NM_001031725	TSS1500	chr1:200638546-200639384	S_Shore			NA	1:200640155-200640325	Promoter_Associated	NA
cg00577147	-0.325359	9.93163e-05	0.00089639	37	3	11888606	R	C3orf31	NM_138807	TSS1500	chr3:11887799-11888538	S_Shore			NA	3:11887734-11889427	Promoter_Associated	NA
cg00577488	-0.597566	0.000202621	0.00168179	37	8	142126324	R								TRUE			NA
cg00577560	-1.79249	1.03252e-14	6.39626e-13	37	1	15271830	R	KIAA1026;KIAA1026;KIAA1026;KIAA1026;KIAA1026	NM_201628;NM_001018001;NM_001017999;NM_015209;NM_001018000	Body;5'UTR;TSS1500;Body;Body					TRUE			TRUE
cg00578032	-0.892575	2.98296e-07	4.6975e-06	37	19	38308069	R				chr19:38307878-38308526	Island	high-CpG:42999808-42999964		TRUE			TRUE
cg00578304	1.1139	1.98041e-06	2.64032e-05	37	7	2968627	F	CARD11	NM_032415	Body	chr7:2968234-2968596	S_Shore			NA			NA
cg00578690	0.664687	1.05569e-06	1.49029e-05	37	11	124974175	R	TMEM218	NM_001080546	TSS1500					NA			NA
cg00579402	1.8883	2.21468e-14	1.29361e-12	37	19	5838999	F	FUT6;FUT6;FUT6;FUT6	NM_000150;NM_001040701;NM_001040701;NM_000150	1stExon;5'UTR;1stExon;5'UTR					NA			NA
cg00579706	0.999786	1.41248e-07	2.37404e-06	37	2	121981866	R	TFCP2L1	NM_014553	3'UTR	chr2:121983326-121983740	N_Shore			NA			NA
cg00579805	0.86503	8.22083e-05	0.000756855	37	1	185822829	F	HMCN1	NM_031935	Body					TRUE			NA
cg00580340	-0.88182	1.65757e-08	3.33481e-07	37	1	47898239	R	MGC12982	NR_026878	Body	chr1:47899125-47899398	N_Shore		RDMR	TRUE	1:47897434-47899127	Promoter_Associated	TRUE
cg00580497	2.17691	2.19566e-22	6.41864e-20	37	5	1153746	R				chr5:1155223-1156466	N_Shore			NA			NA
cg00580752	2.02904	3.46703e-17	3.43422e-15	37	5	80655015	R	RNU5E;RNU5D;ACOT12	NR_002754;NR_002755;NM_130767	Body;Body;Body					TRUE			NA
cg00581320	-1.12193	8.32273e-10	2.1298e-08	37	3	62425299	R	CADPS;CADPS;CADPS	NM_003716;NM_183394;NM_183393	Body;Body;Body					TRUE			NA
cg00581334	1.39161	4.28574e-06	5.31924e-05	37	3	137904059	F				chr3:137906035-137906861	N_Shore			NA			NA
cg00581764	1.55711	3.95129e-13	1.84007e-11	37	6	158183853	F								TRUE	6:158183733-158183866	Unclassified_Cell_type_specific	NA
cg00581783	-0.394932	0.000450043	0.00340279	37	3	183731991	F	ABCC5;ABCC5	NM_005688;NM_001023587	Body;Body	chr3:183735183-183736103	N_Shelf			NA			NA
cg00582531	1.77516	9.31538e-11	2.83179e-09	37	5	133867864	F	PHF15	NM_015288	5'UTR					TRUE			NA
cg00582671	1.13647	8.34451e-09	1.78017e-07	37	1	872235	F	SAMD11	NM_152486	Body	chr1:869332-871872	S_Shore			NA			NA
cg00583001	1.16801	1.51607e-11	5.31332e-10	37	8	102093477	F				chr8:102092794-102093240	S_Shore			NA	8:102092346-102093640	Unclassified_Cell_type_specific	TRUE
cg00583068	-3.55797	1.6975e-18	2.19066e-16	37	1	224972796	R								TRUE			NA
cg00583299	0.896587	1.48591e-13	7.44974e-12	37	2	97485619	R	CNNM3;CNNM3	NM_017623;NM_199078	Body;Body	chr2:97481356-97483276	S_Shelf		CDMR	NA			NA
cg00583780	-1.74524	1.52566e-08	3.09015e-07	37	1	105031120	F								TRUE			NA
cg00583861	1.26958	0.000290038	0.00230941	37	1	32014363	F								TRUE	1:32014257-32015344	Unclassified	TRUE
cg00584026	-1.34214	0.000367397	0.00284759	37	4	942342	F	TMEM175	NM_032326	Body	chr4:940613-941057	S_Shore			NA			NA
cg00584089	3.39702	1.01769e-24	4.83705e-22	37	2	202776922	F								TRUE			NA
cg00584174	2.99772	1.32234e-23	4.94729e-21	37	11	63257403	F	HRASLS5;HRASLS5;HRASLS5	NM_001146728;NM_054108;NM_001146729	Body;Body;Body	chr11:63258378-63258804	N_Shore			TRUE			NA
cg00584416	-0.624092	0.000519555	0.00385819	37	1	114355299	R	RSBN1	NM_018364	TSS1500	chr1:114354373-114355300	Island			NA	1:114353908-114355752	Promoter_Associated	NA
cg00584456	-0.735723	0.00146643	0.00951877	37	8	7191273	R	FAM66B	NR_027423	Body					NA			NA
cg00584840	1.68419	5.2939e-05	0.000510328	37	3	112903054	R								TRUE			NA
cg00585174	-1.37759	9.99542e-09	2.10155e-07	37	10	134499472	R	INPP5A	NM_005539	Body					NA			TRUE
cg00585621	1.29887	4.27766e-09	9.60915e-08	37	4	100868748	R	DNAJB14	NM_001031723	TSS1500	chr4:100870377-100871994	N_Shore			NA	4:100866943-100868841	NonGene_Associated	NA
cg00586058	1.90523	2.63378e-12	1.05663e-10	37	1	18063105	R								TRUE			NA
cg00586383	0.834848	0.00062485	0.00453329	37	17	75528194	R				chr17:75524589-75525152	S_Shelf			NA			NA
cg00586700	-0.819329	8.00519e-05	0.00073887	37	19	50015178	F	FCGRT;FCGRT	NM_001136019;NM_004107	TSS1500;TSS1500	chr19:50016531-50016851	N_Shore			NA			NA
cg00586817	-2.9761	3.71629e-09	8.44534e-08	37	2	200329872	R				chr2:200320502-200329681	S_Shore		RDMR	NA			NA
cg00587009	-1.40177	1.8732e-05	0.000201212	37	6	106429129	R				chr6:106429111-106429772	Island			NA	6:106428943-106429555	Unclassified_Cell_type_specific	NA
cg00587472	-0.815132	0.000148403	0.00127848	37	2	6952860	R								TRUE			NA
cg00587790	-0.404495	0.000195674	0.00163072	37	7	33255991	R	BBS9;BBS9;BBS9;BBS9	NM_001033604;NM_014451;NM_198428;NM_001033605	Body;Body;Body;Body					TRUE			NA
cg00588297	0.728136	0.000235708	0.0019219	37	2	74753691	R	DQX1	NM_133637	TSS1500	chr2:74756223-74757930	N_Shelf			NA			TRUE
cg00588517	1.42349	1.50591e-07	2.51828e-06	37	6	31895464	R	C2;C2;C2;C2	NM_000063;NM_000063;NM_001145903;NM_001145903	1stExon;5'UTR;1stExon;5'UTR			low-CpG:32003180-32003526		NA			NA
cg00588577	-0.231267	0.000542678	0.00400641	37	10	70480905	R	CCAR1	NM_018237	TSS200	chr10:70480704-70481598	Island	high-CpG:70150882-70151310		NA	10:70480508-70482420	Promoter_Associated	NA
cg00588621	0.951309	0.000708752	0.00505774	37	12	104697620	R	EID3;TXNRD1;TXNRD1;TXNRD1;EID3;TXNRD1;TXNRD1	NM_001008394;NM_182729;NM_182743;NM_001093771;NM_001008394;NM_003330;NM_182742	1stExon;5'UTR;5'UTR;Body;5'UTR;Body;5'UTR	chr12:104697348-104697984	Island			TRUE	12:104697065-104698182	Promoter_Associated	TRUE
cg00588920	0.888355	0.000345791	0.00269839	37	8	72917147	R				chr8:72917305-72917641	N_Shore		RDMR	TRUE			NA
cg00589002	1.39855	4.19887e-11	1.35792e-09	37	1	3606082	F	TP73;TP73;TP73;TP73	NM_001126240;NM_001126242;NM_005427;NM_001126241	TSS1500;TSS1500;Body;TSS1500	chr1:3607096-3607553	N_Shore			NA			NA
cg00589488	0.936397	4.20117e-08	7.83919e-07	37	3	49760249	R	GMPPB;GMPPB	NM_021971;NM_013334	Body;Body	chr3:49760863-49761895	N_Shore			NA			NA
cg00589737	-2.01706	5.73093e-09	1.25846e-07	37	5	77252276	R				chr5:77253832-77254049	N_Shore			NA			NA
cg00589791	-1.19757	2.76214e-07	4.37815e-06	37	5	30429329	R								NA			NA
cg00589864	-0.285079	0.000117215	0.00103829	37	2	68478328	R	PPP3R1	NM_000945	Body	chr2:68479061-68480040	N_Shore			NA	2:68477964-68478813	Promoter_Associated	NA
cg00589895	-0.296533	0.000650739	0.00469564	37	3	172429056	R	NCEH1;NCEH1;NCEH1;NCEH1	NM_001146276;NM_001146277;NM_001146278;NM_020792	TSS200;TSS200;TSS200;TSS200	chr3:172428416-172428950	S_Shore			NA	3:172428101-172429451	Promoter_Associated	NA
cg00590029	-0.785301	0.000663172	0.00477336	37	12	114838618	F	TBX5;TBX5;TBX5;TBX5	NM_000192;NM_181486;NM_080717;NM_080718	Body;Body;Body;Body	chr12:114838312-114838889	Island			NA			NA
cg00590173	0.665546	2.272e-05	0.000239451	37	5	75524056	R	SV2C	NM_014979	Body					TRUE			NA
cg00591160	-0.555861	1.57233e-05	0.000172186	37	12	6772270	F	ING4;ING4;ING4;ING4;ING4;ING4;ING4;ING4;ING4;ING4;ING4;ING4	NM_001127585;NM_001127583;NM_001127582;NM_001127586;NM_001127586;NM_016162;NM_001127584;NM_001127583;NM_001127584;NM_001127582;NM_001127585;NM_016162	1stExon;5'UTR;1stExon;1stExon;5'UTR;1stExon;5'UTR;1stExon;1stExon;5'UTR;5'UTR;5'UTR	chr12:6772258-6772579	Island			NA	12:6771780-6772830	Promoter_Associated	NA
cg00591515	0.87784	2.90256e-08	5.57312e-07	37	19	54971526	R	LENG8	NM_052925	Body	chr19:54971878-54972090	N_Shore			NA			NA
cg00592058	-1.71017	5.43094e-14	2.94672e-12	37	6	40996075	R	UNC5CL	NM_173561	3'UTR	chr6:40995802-40996241	Island			TRUE	6:40994975-40996894	Promoter_Associated	NA
cg00592593	1.10577	9.86678e-13	4.27554e-11	37	22	50585197	R	MOV10L1;MOV10L1;MOV10L1;MOV10L1	NM_001164104;NM_001164106;NM_001164105;NM_018995	Body;TSS1500;Body;Body					NA			TRUE
cg00592643	1.37458	8.79441e-06	0.000101915	37	20	11870769	R	BTBD3	NM_181443	TSS1500	chr20:11871374-11872207	N_Shore			NA			NA
cg00593008	1.39731	1.56085e-08	3.1564e-07	37	5	75465603	F	SV2C	NM_014979	Body	chr5:75466604-75466917	N_Shore			NA			NA
cg00593298	-2.1022	2.45166e-15	1.70265e-13	37	10	13890043	R	FRMD4A	NM_018027	Body					TRUE			NA
cg00593404	-0.33663	0.000546978	0.00403458	37	6	52377740	F	TRAM2	NM_012288	Body					TRUE			NA
cg00593773	-1.71048	9.8754e-07	1.40234e-05	37	18	77336201	R				chr18:77336081-77336282	Island			NA			NA
cg00594099	-0.797635	0.000640357	0.00463228	37	1	27893886	R	AHDC1	NM_001029882	5'UTR	chr1:27894927-27895524	N_Shore			TRUE			NA
cg00594561	0.876168	2.19705e-06	2.90163e-05	37	17	48073423	F	DLX3	NM_005220	TSS1500	chr17:48074050-48074614	N_Shore			TRUE	17:48073404-48074745	Unclassified	NA
cg00594854	1.06943	0.000171158	0.00144847	37	17	48052682	F				chr17:48048953-48050616	S_Shelf			TRUE			NA
cg00595022	0.450644	0.000221705	0.00182077	37	5	114633468	F	CCDC112;CCDC112	NM_001040440;NM_152549	TSS1500;TSS1500	chr5:114631986-114632302	S_Shore			NA			NA
cg00595243	1.43825	3.73816e-08	7.04096e-07	37	6	133137893	F	RPS12;SNORD100;SNORA33	NM_001016;NR_002435;NR_002436	Body;TSS200;TSS1500	chr6:133135364-133135829	S_Shelf			NA			NA
cg00595472	3.12643	1.95526e-15	1.38311e-13	37	11	61525251	R	DKFZP434K028;C11orf9;C11orf9	NR_026882;NM_013279;NM_001127392	TSS200;Body;Body					NA			NA
cg00595787	-0.79667	0.00147642	0.00957382	37	2	100161120	R								TRUE			NA
cg00596687	-0.817833	0.00132385	0.0087135	37	20	61151472	R	C20orf166;MIR1-1	NM_178463;NR_029780	Body;TSS200	chr20:61151586-61151903	N_Shore			NA	20:61150619-61151713	Unclassified_Cell_type_specific	NA
cg00597602	-0.877928	6.58158e-10	1.71644e-08	37	16	29229107	R				chr16:29229952-29230176	N_Shore			NA			NA
cg00597687	0.726445	3.13487e-05	0.000319723	37	1	63785003	R				chr1:63782394-63790471	Island			NA	1:63784939-63786144	Unclassified_Cell_type_specific	NA
cg00598021	-2.28275	4.97572e-15	3.26487e-13	37	4	10113794	R	WDR1;WDR1	NM_005112;NM_017491	Body;Body	chr4:10117575-10118952	N_Shelf			NA	4:10113249-10113822	Promoter_Associated	NA
cg00598235	0.667441	1.36576e-05	0.000151766	37	4	17580680	F	LAP3	NM_015907	Body	chr4:17578648-17579539	S_Shore			NA	4:17580578-17580702	Promoter_Associated_Cell_type_specific	NA
cg00599702	-0.546853	0.00135714	0.00890479	37	1	30584352	F								NA	1:30584152-30585351	Unclassified_Cell_type_specific	TRUE
cg00600477	0.700336	0.000260166	0.00209748	37	8	144715010	R				chr8:144717866-144718798	N_Shelf			NA	8:144714668-144715021	Unclassified_Cell_type_specific	NA
cg00600617	-1.40037	1.19244e-13	6.08766e-12	37	6	107221887	F	LOC553137	NR_015365	Body					TRUE			NA
cg00600916	-0.904429	8.18259e-05	0.000753896	37	7	158800547	R	LOC154822	NR_024394	TSS1500	chr7:158798591-158799434	S_Shore			NA			NA
cg00601387	4.10134	5.70945e-22	1.54149e-19	37	5	110427072	R	WDR36	NM_139281	TSS1500	chr5:110427777-110428270	N_Shore		CDMR	NA			NA
cg00601432	0.689909	3.52247e-07	5.47063e-06	37	5	151148420	R				chr5:151150014-151152086	N_Shore			NA			NA
cg00601711	1.44331	5.13467e-15	3.35513e-13	37	5	1089507	F	SLC12A7	NM_006598	Body	chr5:1087533-1087909	S_Shore			NA			NA
cg00601916	0.710399	6.02957e-05	0.000573889	37	1	16069388	R	TMEM82	NM_001013641	Body	chr1:16070628-16070853	N_Shore			NA			NA
cg00602326	3.43378	1.38088e-23	5.13802e-21	37	5	31427700	R	RNASEN;RNASEN	NM_013235;NM_001100412	Body;Body					TRUE			NA
cg00602416	-1.85035	3.47133e-11	1.13906e-09	37	10	21797819	F				chr10:21797632-21799341	Island			NA			NA
cg00603110	0.576955	0.000293245	0.00233194	37	6	134395621	F								TRUE			NA
cg00603274	0.801018	6.18498e-10	1.62016e-08	37	11	61596626	R	FADS2	NM_004265	Body	chr11:61594996-61596710	Island			NA	11:61595142-61597292	Promoter_Associated	NA
cg00603340	0.816285	1.00274e-05	0.000114765	37	5	180622072	R	TRIM7;TRIM7;TRIM7;TRIM7;TRIM7	NM_203293;NM_203295;NM_203296;NM_203294;NM_203297	3'UTR;3'UTR;3'UTR;3'UTR;3'UTR	chr5:180622178-180622658	N_Shore			NA			NA
cg00603356	0.437192	3.54381e-06	4.47799e-05	37	7	107382211	F				chr7:107383657-107385021	N_Shore			NA			NA
cg00604454	3.15668	5.0538e-16	4.00731e-14	37	16	73096966	F				chr16:73096888-73097115	Island		RDMR	NA			NA
cg00604736	1.38873	5.42592e-10	1.43692e-08	37	12	50366624	F	AQP6;AQP6	NM_001652;NM_001652	5'UTR;1stExon					NA			NA
cg00604840	2.16497	1.47103e-09	3.59455e-08	37	5	154230173	R	C5orf4;C5orf4	NM_032385;NM_032385	5'UTR;1stExon			low-CpG:154210329-154210417		TRUE			TRUE
cg00605063	3.98846	6.16756e-21	1.33289e-18	37	7	27289128	F				chr7:27291119-27292197	N_Shore			NA			TRUE
cg00605362	-1.04855	0.000148746	0.00128089	37	16	4793770	F	C16orf71	NM_139170	Body	chr16:4790462-4790675	S_Shelf			TRUE			NA
cg00605523	0.953334	1.64355e-05	0.000179072	37	2	238523251	F								TRUE	2:238522962-238523501	Unclassified_Cell_type_specific	NA
cg00605831	0.449383	7.30482e-05	0.000680915	37	5	171481220	R	STK10	NM_005990	Body	chr5:171482573-171482777	N_Shore			NA			NA
cg00605982	-0.712536	0.00135892	0.00891483	37	3	10857688	R	SLC6A11	NM_014229	TSS1500	chr3:10857687-10858447	Island			TRUE			NA
cg00606396	-1.69819	1.02294e-07	1.76717e-06	37	5	19531574	F	CDH18;CDH18	NM_001167667;NM_004934	Body;Body					NA			NA
cg00606841	0.536875	2.18361e-09	5.17272e-08	37	21	40757691	R	WRB	NM_004627	Body	chr21:40757602-40757900	Island			NA	21:40757648-40758181	Promoter_Associated_Cell_type_specific	TRUE
cg00607609	-1.51674	1.12483e-07	1.92833e-06	37	4	119962922	R	SYNPO2	NM_133477	Body					TRUE	4:119962901-119963725	Unclassified	NA
cg00607630	0.810572	8.00184e-07	1.15695e-05	37	16	9030093	R	USP7	NM_003470	Body					TRUE	16:9029364-9030953	Promoter_Associated	NA
cg00607755	1.73132	2.60896e-12	1.04739e-10	37	2	42274082	F	PKDCC	NM_138370	TSS1500					NA			NA
cg00608540	1.75959	1.69943e-20	3.33832e-18	37	5	180627973	R	TRIM7;TRIM7;TRIM7;TRIM7;TRIM7	NM_203297;NM_203293;NM_203294;NM_203295;NM_203296	TSS200;Body;5'UTR;5'UTR;5'UTR	chr5:180630981-180632569	N_Shelf			NA			NA
cg00609473	-0.763829	0.00089148	0.00617819	37	14	23351842	R	REM2	NM_173527	TSS1500	chr14:23355738-23356402	N_Shelf			NA			NA
cg00609630	1.83671	2.17887e-09	5.16329e-08	37	12	123258653	F	CCDC62;CCDC62;CCDC62	NM_201435;NM_032573;NR_027918	TSS1500;TSS1500;TSS1500					NA	12:123258171-123260125	Promoter_Associated	TRUE
cg00610294	-1.84765	2.07521e-08	4.09503e-07	37	4	187357928	R				chr4:187356976-187357233	S_Shore			NA			NA
cg00610385	0.431503	0.000697775	0.00498888	37	7	32528051	R	LSM5;LSM5;LSM5;LSM5	NM_001139499;NR_024466;NM_012322;NM_001130710	Body;Body;Body;Body	chr7:32529753-32530146	N_Shore			NA			NA
cg00611192	0.75783	3.3556e-07	5.23079e-06	37	1	249151633	F	ZNF692;ZNF692	NM_017865;NM_001136036	Body;Body	chr1:249152411-249153419	N_Shore			TRUE			NA
cg00611372	-2.32732	5.52942e-26	3.56227e-23	37	15	40421080	R								NA			NA
cg00611495	-1.38847	2.38366e-11	8.0513e-10	37	16	1120275	R	LOC146336	NR_027242	Body	chr16:1120153-1120441	Island			NA			NA
cg00611535	-0.257213	0.000500796	0.00373447	37	12	56367227	F	RAB5B	NM_002868	TSS1500	chr12:56367636-56368172	N_Shore		RDMR	NA	12:56367192-56368381	Promoter_Associated	NA
cg00612176	0.837364	4.45855e-08	8.27967e-07	37	3	46872949	R	PRSS42	NM_182702	Body	chr3:46874892-46875769	N_Shore			NA			NA
cg00612299	0.920228	4.69558e-07	7.10568e-06	37	19	14584761	F	PTGER1	NM_000955	Body	chr19:14582419-14585098	Island			NA			NA
cg00613284	3.02086	9.06791e-27	7.22252e-24	37	8	67419936	R	C8orf46	NM_152765	Body	chr8:67417588-67417876	S_Shelf			NA	8:67419490-67420090	Unclassified	TRUE
cg00613562	1.96167	9.22688e-13	4.01532e-11	37	8	70378994	R	SULF1;SULF1;SULF1;SULF1	NM_015170;NM_001128204;NM_015170;NM_001128204	5'UTR;1stExon;1stExon;5'UTR			low-CpG:70541412-70541638		TRUE			TRUE
cg00614011	-1.40991	3.68366e-06	4.63903e-05	37	8	120436479	R	NOV	NM_002514	3'UTR					NA			NA
cg00614314	1.49205	2.87891e-06	3.70719e-05	37	15	82944287	R	LOC80154	NR_026811	TSS1500	chr15:82944650-82945664	N_Shore			NA			NA
cg00614392	1.26343	5.7283e-07	8.52004e-06	37	6	106433792	R				chr6:106433984-106434459	N_Shore		RDMR	NA			NA
cg00614617	0.909505	0.00034976	0.00272529	37	17	8921074	F				chr17:8924167-8926920	N_Shelf			NA			NA
cg00615592	1.11662	6.45248e-06	7.71136e-05	37	6	158937125	R				chr6:158937285-158937491	N_Shore			NA			NA
cg00617568	2.25035	1.88909e-10	5.43667e-09	37	17	47208775	R	B4GALNT2;B4GALNT2	NM_001159387;NM_001159388	TSS1500;TSS1500	chr17:47209811-47210740	N_Shore			NA			NA
cg00617691	-1.27868	1.5621e-08	3.15877e-07	37	10	743931	R				chr10:743240-743479	S_Shore			NA			NA
cg00617975	0.407447	0.000702329	0.00501695	37	22	46644463	R	C22orf40	NM_207327	5'UTR	chr22:46645764-46646957	N_Shore			NA			NA
cg00618087	-1.43703	2.67978e-05	0.000277953	37	17	16282382	F				chr17:16283927-16284768	N_Shore			NA			NA
cg00618155	1.04227	1.32121e-06	1.82537e-05	37	10	72459629	R	ADAMTS14;ADAMTS14	NM_080722;NM_139155	Body;Body					TRUE			TRUE
cg00618312	0.508034	0.00107916	0.00729807	37	13	41556559	R	ELF1;ELF1	NM_001145353;NM_172373	TSS200;5'UTR					NA			NA
cg00618323	0.725826	5.8846e-06	7.0913e-05	37	5	176515533	F	FGFR4;FGFR4;FGFR4	NM_002011;NM_022963;NM_213647	5'UTR;TSS1500;5'UTR	chr5:176513886-176514433	S_Shore			NA	5:176515347-176515581	Unclassified_Cell_type_specific	NA
cg00618596	-0.713225	5.59448e-08	1.01792e-06	37	16	71088536	R	HYDIN;HYDIN	NM_017558;NM_032821	Body;Body					TRUE			NA
cg00619188	-0.567759	0.000450087	0.003403	37	22	37493456	F	TMPRSS6	NM_153609	Body	chr22:37493704-37494174	N_Shore			NA			NA
cg00619263	1.60224	1.5362e-08	3.10996e-07	37	5	134471974	R								TRUE			NA
cg00620449	-0.282666	0.00101636	0.00692956	37	5	75013490	R	C5orf37	NM_001099271	TSS200	chr5:75012962-75013515	Island			NA	5:75012240-75013690	Promoter_Associated	NA
cg00620452	0.731868	0.000149811	0.00128887	37	3	32147645	F	GPD1L	NM_015141	TSS1500	chr3:32147826-32148874	N_Shore			NA	3:32147510-32148764	Promoter_Associated	NA
cg00620464	2.79324	3.57994e-13	1.67944e-11	37	2	176868389	R	KIAA1715	NM_030650	TSS1500	chr2:176866693-176867188	S_Shore			NA			NA
cg00621646	1.87584	1.61668e-05	0.000176478	37	11	123849141	R	OR10S1	NM_001004474	TSS1500					NA			NA
cg00621750	0.256769	0.000144356	0.00124765	37	3	39423954	F	SLC25A38	NM_017875	TSS1500	chr3:39424696-39426058	N_Shore			NA			NA
cg00621899	1.81291	1.06658e-12	4.59493e-11	37	7	100486423	R	UFSP1;UFSP1	NM_001015072;NM_001015072	1stExon;3'UTR	chr7:100486729-100488093	N_Shore			NA			NA
cg00622318	1.00573	1.04998e-06	1.483e-05	37	10	130514131	F								TRUE			NA
cg00622702	2.88045	1.28128e-23	4.81134e-21	37	21	34727950	R	IFNAR1	NM_000629	3'UTR					NA			NA
cg00624589	-0.668156	0.00131007	0.00863301	37	16	1094742	F				chr16:1098522-1098875	N_Shelf			NA			NA
cg00624939	-1.03352	3.169e-07	4.96573e-06	37	8	144279703	F								NA			NA
cg00625351	-0.517255	0.000170499	0.00144386	37	3	34048130	F								TRUE			NA
cg00625425	1.15777	8.74272e-07	1.25513e-05	37	1	62785512	R	KANK4	NM_181712	TSS1500	chr1:62784136-62785133	S_Shore			NA			NA
cg00625939	0.666016	0.000146325	0.00126256	37	4	189028032	F				chr4:189027609-189028033	Island			NA			NA
cg00626119	-0.582149	2.2411e-05	0.000236604	37	1	156785288	F	SH2D2A;SH2D2A;NTRK1;SH2D2A;SH2D2A;SH2D2A	NM_001161443;NM_001161442;NM_001007792;NM_003975;NM_001161441;NM_001161444	Body;Body;TSS1500;Body;Body;Body	chr1:156783523-156784037	S_Shore			NA			NA
cg00626466	1.97654	9.22068e-10	2.33903e-08	37	12	65153982	F	GNS	NM_002076	TSS1500	chr12:65152869-65153489	S_Shore			NA			NA
cg00626515	0.734608	8.88356e-07	1.27351e-05	37	20	56287004	R	PMEPA1;PMEPA1;PMEPA1	NM_199171;NM_199169;NM_199170	TSS1500;TSS1500;TSS1500	chr20:56283891-56285395	S_Shore			NA			NA
cg00626702	-1.24272	0.00133617	0.00878311	37	4	1647016	R	FAM53A	NM_001013622	Body	chr4:1645886-1646324	S_Shore			TRUE			TRUE
cg00627029	-0.827793	0.000156773	0.00134109	37	17	72322791	F	KIF19	NM_153209	Body	chr17:72321948-72322461	S_Shore		DMR	TRUE	17:72321555-72323231	Unclassified	TRUE
cg00628382	0.618059	1.71293e-06	2.3129e-05	37	3	176820549	R	TBL1XR1	NM_024665	5'UTR					TRUE			NA
cg00628919	-1.67577	5.93399e-08	1.07341e-06	37	16	87702703	R	JPH3	NM_020655	Body	chr16:87702493-87702704	Island			NA			NA
cg00629117	2.75177	2.20228e-10	6.25417e-09	37	16	1844932	R	IGFALS;IGFALS;IGFALS	NR_027389;NM_004970;NM_001146006	TSS200;TSS1500;TSS1500	chr16:1840623-1842688	S_Shelf			NA			NA
cg00629585	1.61803	7.74391e-10	1.99255e-08	37	9	135853992	R	GFI1B;GFI1B	NM_001135031;NM_004188	TSS200;TSS200					TRUE			NA
cg00629688	0.990063	1.39044e-07	2.33971e-06	37	11	105479843	R	GRIA4;GRIA4;GRIA4	NM_001077244;NM_000829;NM_001077243	TSS1500;TSS1500;TSS1500	chr11:105481126-105481422	N_Shore			NA			NA
cg00630781	0.613214	1.43311e-05	0.000158437	37	6	33263475	F	RGL2;RGL2	NR_028387;NM_004761	Body;Body	chr6:33266302-33267582	N_Shelf			NA			NA
cg00631327	2.8786	6.10268e-14	3.28151e-12	37	8	3965218	R	CSMD1	NM_033225	Body					NA			NA
cg00632070	0.709871	0.00144564	0.00940507	37	13	31506324	R	C13orf26	NM_152325	TSS1500					NA			NA
cg00632364	-0.579049	0.000643393	0.00465029	37	6	170401305	R				chr6:170401900-170402500	N_Shore			NA	6:170400988-170402824	Unclassified_Cell_type_specific	NA
cg00632560	1.09285	1.68608e-05	0.000183225	37	20	62675267	F				chr20:62673792-62674131	S_Shore			NA	20:62675218-62675411	Unclassified_Cell_type_specific	NA
cg00633969	0.834128	1.42749e-07	2.3974e-06	37	3	122284550	R	PARP9;PARP9;PARP9;PARP9;PARP9;DTX3L;PARP9	NM_001146104;NM_001146106;NM_031458;NM_001146103;NM_001146102;NM_138287;NM_001146105	TSS1500;TSS1500;TSS1500;TSS1500;TSS1500;Body;TSS1500	chr3:122283002-122283594	S_Shore			NA			NA
cg00634483	-2.56145	1.81059e-18	2.32263e-16	37	8	49470964	R				chr8:49468683-49468959	S_Shelf			NA			NA
cg00634542	2.19606	2.02408e-22	5.96838e-20	37	2	219254588	R	SLC11A1	NM_000578	Body	chr2:219255949-219256210	N_Shore			NA			NA
cg00634698	0.542885	6.28014e-06	7.52259e-05	37	10	71123842	R	HK1;HK1;HK1;HK1;HK1	NM_033500;NM_000188;NM_033498;NM_033497;NM_033496	Body;Body;Body;Body;Body					TRUE			NA
cg00634714	1.2074	5.43584e-07	8.11881e-06	37	17	74497851	F	RHBDF2;RHBDF2	NM_001005498;NM_024599	TSS1500;TSS1500	chr17:74496992-74497632	S_Shore			NA	17:74496555-74498203	Promoter_Associated	NA
cg00634968	-1.51232	4.15264e-09	9.34633e-08	37	6	51707133	R	PKHD1;PKHD1	NM_138694;NM_170724	Body;Body					TRUE			NA
cg00635522	-1.02741	1.02823e-05	0.000117376	37	13	45396744	F								NA			NA
cg00635560	-0.973301	2.2444e-05	0.000236872	37	12	56359158	R	CDK2;CDK2;SILV	NM_001798;NM_052827;NM_006928	TSS1500;TSS1500;Body	chr12:56360467-56360909	N_Shore			NA			NA
cg00635590	0.908886	1.49473e-11	5.24351e-10	37	19	2273706	F				chr19:2273693-2274047	Island			NA	19:2272815-2274318	Promoter_Associated	NA
cg00635674	0.861364	0.00030572	0.00242	37	15	72490448	R	GRAMD2	NM_001012642	TSS1500	chr15:72489478-72490119	S_Shore			TRUE			NA
cg00636072	-1.62207	1.84034e-10	5.31027e-09	37	2	56410382	R	CCDC85A	NM_001080433	TSS1500	chr2:56410865-56412539	N_Shore			NA	2:56410030-56411079	Unclassified	NA
cg00636416	-4.00369	5.44729e-40	4.44285e-35	37	2	100718912	R	AFF3;AFF3	NM_001025108;NM_002285	Body;Body	chr2:100720385-100720741	N_Shore			NA			NA
cg00636427	-2.22364	4.65308e-08	8.60756e-07	37	18	77190089	F	NFATC1;NFATC1;NFATC1;NFATC1;NFATC1	NM_006162;NM_172388;NM_172389;NM_172387;NM_172390	Body;5'UTR;Body;Body;Body	chr18:77193463-77193764	N_Shelf			NA	18:77189673-77190206	Unclassified_Cell_type_specific	NA
cg00636508	3.50225	6.58568e-20	1.13907e-17	37	16	70624430	R						low-CpG:69181693-69181947		TRUE			NA
cg00636737	0.540863	0.0006387	0.00462177	37	20	62695569	R	TCEA2;TCEA2	NM_003195;NM_198723	Body;5'UTR	chr20:62693942-62695282	S_Shore			NA	20:62694020-62695720	Promoter_Associated	NA
cg00637047	-0.450119	0.000392394	0.00301719	37	10	38384101	F	ZNF37A;ZNF37A	NM_001007094;NM_003421	5'UTR;5'UTR	chr10:38383200-38383962	S_Shore			NA	10:38382734-38384425	Unclassified	NA
cg00637144	0.699797	3.33569e-07	5.20254e-06	37	13	52360268	R	DHRS12;DHRS12	NM_001031719;NM_024705	Body;Body					TRUE			NA
cg00637361	-0.678183	0.000159506	0.00136173	37	16	20493661	F	ACSM2A	NM_001010845	Body					NA			NA
cg00637826	-0.895033	5.42084e-07	8.09848e-06	37	12	12673150	R	DUSP16	NM_030640	Body					TRUE			NA
cg00638020	0.86651	0.000499553	0.00372608	37	7	158281138	F	PTPRN2;PTPRN2;PTPRN2	NM_002847;NM_130842;NM_130843	Body;Body;Body	chr7:158281373-158281734	N_Shore			NA			NA
cg00638574	1.49457	2.02755e-15	1.43176e-13	37	1	209956565	R	C1orf74	NM_152485	Body	chr1:209957721-209958167	N_Shore			NA			NA
cg00639010	1.4518	9.83431e-19	1.32066e-16	37	7	553693	R	PDGFA;PDGFA	NM_002607;NM_033023	Body;Body	chr7:556611-562845	N_Shelf			TRUE			TRUE
cg00639143	1.01495	6.14261e-06	7.37258e-05	37	8	1879639	F	ARHGEF10	NM_014629	Body				CDMR	NA			NA
cg00639215	1.19573	7.26169e-07	1.058e-05	37	16	4702769	F	MGRN1;MGRN1;MGRN1;MGRN1	NM_015246;NM_001142291;NM_001142290;NM_001142289	Body;Body;Body;Body	chr16:4702628-4702851	Island			NA			NA
cg00640053	-0.839009	0.00076352	0.00539771	37	7	155305911	F	CNPY1	NM_001103176	5'UTR	chr7:155302253-155303158	S_Shelf			NA			NA
cg00640314	2.49863	3.92286e-11	1.27572e-09	37	8	67835853	R	SNORD87;SNHG6	NR_002598;NR_002599	TSS1500;Body	chr8:67837480-67837954	N_Shore			NA			NA
cg00640719	0.543084	0.00148791	0.0096384	37	16	70426268	F	ST3GAL2	NM_006927	Body					TRUE			TRUE
cg00641828	0.928657	3.71077e-05	0.000372287	37	8	141715451	R	PTK2;PTK2	NM_153831;NM_005607	Body;Body					TRUE			NA
cg00643235	1.28121	0.000294418	0.00234026	37	6	24650840	R	TTRAP	NM_016614	3'UTR					NA			NA
cg00643311	-0.711599	0.00132529	0.00872074	37	5	1924173	F								NA			NA
cg00644107	-0.856205	0.000142055	0.00123004	37	16	2762673	R	PRSS27	NM_031948	Body	chr16:2765619-2765855	N_Shelf			NA			NA
cg00644317	-1.10802	8.6573e-06	0.000100483	37	7	27237893	R	HOXA13	NM_000522	Body	chr7:27238690-27240311	N_Shore			NA			NA
cg00644351	1.37305	1.3496e-10	3.99312e-09	37	10	121271840	F	RGS10;RGS10	NM_001005339;NM_002925	Body;Body					NA			NA
cg00644416	0.968649	6.34302e-07	9.3535e-06	37	13	114762257	R	RASA3	NM_007368	Body	chr13:114764353-114764622	N_Shelf			NA	13:114762049-114762262	Unclassified_Cell_type_specific	NA
cg00645339	2.13503	3.48768e-08	6.60485e-07	37	15	45670875	R	LOC145663;GATM;GATM	NR_033252;NM_001482;NM_001482	TSS200;1stExon;5'UTR	chr15:45669970-45671029	Island	high-CpG:43457916-43458250		NA	15:45669693-45671628	Unclassified	TRUE
cg00645579	0.548033	0.000135388	0.00117873	37	11	617140	F	IRF7;IRF7;MUPCDH;IRF7;MUPCDH	NM_004031;NM_001572;NM_031264;NM_004029;NM_021924	TSS1500;TSS1500;3'UTR;TSS1500;3'UTR	chr11:617226-617797	N_Shore			NA			NA
cg00645755	0.914923	6.49216e-06	7.75424e-05	37	7	1514031	F	INTS1	NM_001080453	Body	chr7:1513775-1514052	Island			NA	7:1513238-1514799	Gene_Associated	NA
cg00646381	1.18123	1.15052e-11	4.12108e-10	37	17	77835854	R				chr17:77834063-77834368	S_Shore			TRUE			NA
cg00647217	-3.86854	1.11983e-12	4.80658e-11	37	1	165086866	R				chr1:165086756-165087026	Island			NA			NA
cg00647233	1.43601	2.44136e-09	5.72975e-08	37	1	4000154	F								NA			NA
cg00647246	1.51258	4.03859e-15	2.69418e-13	37	7	157071437	R				chr7:157071802-157072845	N_Shore			NA			NA
cg00647262	1.32428	4.48075e-05	0.000440359	37	6	157746584	R	C6orf35	NM_018452	TSS1500	chr6:157744004-157745217	S_Shore			NA			NA
cg00647658	-1.1871	0.00071489	0.00509686	37	16	54227814	R				chr16:54228224-54228479	N_Shore			TRUE	16:54226848-54227968	Unclassified	NA
cg00647720	-0.640506	0.000103454	0.000929645	37	16	89654677	F	CPNE7;CPNE7	NM_014427;NM_153636	Body;Body	chr16:89654041-89654692	Island			NA			NA
cg00647810	0.919689	8.20767e-11	2.51834e-09	37	15	65622990	R	IGDCC3	NM_004884	Body					NA			NA
cg00647820	0.999092	0.000515972	0.00383396	37	17	40259828	F	DHX58	NM_024119	Body	chr17:40259521-40259829	Island			TRUE	17:40259479-40260669	Unclassified	TRUE
cg00648883	2.98083	4.75373e-11	1.52201e-09	37	13	32524761	F	EEF1DP3	NR_027062	Body	chr13:32526882-32527373	N_Shelf			NA			NA
cg00648955	-1.00995	1.61582e-08	3.2574e-07	37	2	31456217	R	EHD3	NM_014600	TSS1500	chr2:31456740-31457653	N_Shore			NA			NA
cg00649632	-0.813611	2.81933e-06	3.63656e-05	37	16	16108802	R	ABCC1;ABCC1;ABCC1;ABCC1;ABCC1	NM_019862;NM_019898;NM_019899;NM_004996;NM_019900	Body;Body;Body;Body;Body					TRUE			NA
cg00651099	-0.376235	5.79923e-06	6.99834e-05	37	4	125599866	R	ANKRD50;ANKRD50	NM_001167882;NM_020337	Body;Body					TRUE			NA
cg00651488	-0.671891	0.00038945	0.00299678	37	16	85236465	F								TRUE			TRUE
cg00651497	-1.60517	4.98834e-07	7.50791e-06	37	15	48829009	R	FBN1	NM_000138	Body					TRUE			NA
cg00652274	-2.53514	4.53111e-16	3.62315e-14	37	3	115576803	R	LSAMP	NM_002338	Body					TRUE			NA
cg00652846	-1.25743	7.56214e-08	1.34151e-06	37	3	112934087	F	BOC	NM_033254	5'UTR	chr3:112930437-112931506	S_Shelf			NA			NA
cg00653025	1.60814	9.85795e-09	2.07532e-07	37	16	89571489	R				chr16:89573954-89575368	N_Shelf			NA			NA
cg00653085	1.01436	2.25001e-12	9.14454e-11	37	1	53385434	R	ECHDC2	NM_018281	Body	chr1:53386617-53387523	N_Shore			NA	1:53385325-53385599	Unclassified_Cell_type_specific	NA
cg00653615	-0.455541	0.00105202	0.00713802	37	1	151029327	R	CDC42SE1;CDC42SE1	NM_001038707;NM_020239	5'UTR;5'UTR	chr1:151031767-151032352	N_Shelf			NA	1:151028715-151029603	Promoter_Associated_Cell_type_specific	NA
cg00653847	0.551243	0.000101123	0.000911025	37	10	102100212	F								TRUE	10:102100200-102100376	Unclassified_Cell_type_specific	NA
cg00653870	-0.670873	1.99737e-05	0.000213207	37	5	176923028	F	PDLIM7;PDLIM7;PDLIM7	NM_005451;NM_213636;NM_203352	Body;Body;Body	chr5:176923804-176925339	N_Shore			TRUE	5:176921975-176923731	Promoter_Associated_Cell_type_specific	NA
cg00655498	0.326051	0.000155133	0.00132854	37	13	52022386	R	INTS6;INTS6	NM_012141;NM_001039937	Body;Body	chr13:52025691-52027946	N_Shelf			NA			NA
cg00655706	-0.857789	8.39116e-05	0.000770987	37	9	138852191	R	UBAC1	NM_016172	Body	chr9:138852639-138853439	N_Shore			NA	9:138851617-138853501	Promoter_Associated	NA
cg00656478	1.38461	6.14193e-10	1.6096e-08	37	9	132480963	F	PRRX2	NM_016307	Body	chr9:132481472-132481745	N_Shore			NA			NA
cg00656513	0.660401	0.000141338	0.00122457	37	15	65064535	R	RBPMS2	NM_194272	Body	chr15:65066916-65068352	N_Shelf			NA			NA
cg00656735	2.02422	1.60643e-08	3.24055e-07	37	6	41470922	R				chr6:41472816-41473291	N_Shore			TRUE			NA
cg00656881	0.512548	9.91066e-05	0.000894814	37	1	2138757	F	C1orf86	NM_001146310	5'UTR	chr1:2136808-2137351	S_Shore			NA			NA
cg00656991	2.06538	3.27178e-15	2.21767e-13	37	6	71136165	F	FAM135A;FAM135A;FAM135A;FAM135A	NM_020819;NM_001162529;NM_001162529;NM_001105531	5'UTR;5'UTR;1stExon;5'UTR					NA			NA
cg00657058	-0.248231	8.94304e-05	0.000816433	37	10	93683597	R	BTAF1	NM_003972	TSS200	chr10:93683430-93683839	Island	high-CpG:93673485-93673580		NA	10:93683040-93684336	Promoter_Associated_Cell_type_specific	NA
cg00657094	-1.41863	1.71713e-06	2.31796e-05	37	1	1174190	F				chr1:1173915-1174263	Island			TRUE	1:1174073-1175425	Unclassified_Cell_type_specific	NA
cg00657529	1.52499	9.37496e-15	5.84043e-13	37	6	31698687	F	CLIC1;DDAH2	NM_001288;NM_013974	Body;TSS1500	chr6:31695894-31698245	S_Shore			NA			NA
cg00658161	1.02305	1.73351e-06	2.33851e-05	37	8	27279957	R	PTK2B;PTK2B;PTK2B;PTK2B	NM_173176;NM_173175;NM_173174;NM_004103	Body;Body;Body;Body			low-CpG:27335783-27335954		NA			NA
cg00658740	0.834361	2.56981e-07	4.09863e-06	37	3	136579741	R	NCK1	NM_006153	TSS1500	chr3:136580875-136581721	N_Shore			NA			NA
cg00659878	0.867443	0.00011512	0.00102215	37	1	229706242	F								NA			NA
cg00660140	-0.357565	0.00136867	0.00896813	37	2	128166045	F				chr2:128165848-128166198	Island			TRUE	2:128165106-128166558	Unclassified_Cell_type_specific	NA
cg00660167	0.587448	0.000937406	0.00645696	37	17	80200974	F				chr17:80202799-80203289	N_Shore			NA			TRUE
cg00660272	0.799796	1.82794e-05	0.000196873	37	1	24231353	F	CNR2	NM_001841	5'UTR	chr1:24229115-24229537	S_Shore			NA	1:24231249-24231648	Gene_Associated_Cell_type_specific	NA
cg00660693	-0.599952	7.16251e-05	0.0006688	37	1	2850737	F				chr1:2850665-2850873	Island			NA			NA
cg00660765	0.579808	0.000220915	0.00181509	37	3	69371349	F	FRMD4B	NM_015123	Body					NA			NA
cg00661347	1.33098	3.74381e-19	5.48792e-17	37	10	71661228	R	COL13A1;COL13A1;COL13A1;COL13A1;COL13A1;COL13A1;COL13A1;COL13A1;COL13A1;COL13A1;COL13A1;COL13A1;COL13A1;COL13A1;COL13A1;COL13A1;COL13A1;COL13A1;COL13A1;COL13A1	NM_080798;NM_080809;NM_080800;NM_080811;NM_080810;NM_080799;NM_080813;NM_005203;NM_080815;NM_080807;NM_080801;NM_080808;NM_080814;NM_080802;NM_080812;NM_080805;NM_080806;NM_080804;NM_080803;NM_001130103	Body;Body;Body;Body;Body;Body;Body;Body;Body;Body;Body;Body;Body;Body;Body;Body;Body;Body;Body;Body					TRUE	10:71660860-71662215	Unclassified_Cell_type_specific	NA
cg00663946	1.23198	3.92798e-06	4.91515e-05	37	7	134374944	R								TRUE			NA
cg00664021	0.808416	7.49041e-06	8.81869e-05	37	7	72717984	F	NSUN5;NSUN5;NSUN5;NSUN5	NM_001168348;NM_148956;NM_018044;NM_001168347	Body;Body;Body;Body	chr7:72717665-72717985	Island			NA			NA
cg00664343	0.825395	6.06282e-05	0.000576677	37	3	137902226	F				chr3:137906035-137906861	N_Shelf			NA			NA
cg00664446	-0.900293	2.38106e-05	0.000249886	37	6	134141554	R	MGC34034;MGC34034	NR_027030;NR_027029	TSS1500;TSS1500					NA			NA
cg00664723	-0.92525	4.56235e-07	6.92013e-06	37	5	15927184	F	FBXL7	NM_012304	Body	chr5:15928088-15928518	N_Shore			NA			NA
cg00664920	0.41458	1.52432e-06	2.07852e-05	37	16	2664747	F	LOC652276	NR_015441	Body	chr16:2664552-2664819	Island			NA			NA
cg00665106	1.93055	7.32134e-13	3.24248e-11	37	1	201515370	F								TRUE			NA
cg00665114	-1.44251	5.08516e-11	1.62012e-09	37	1	175403347	R	TNR	NM_003285	5'UTR					NA			NA
cg00665374	-1.06489	0.000212789	0.00175596	37	6	131602870	R	AKAP7;AKAP7;AKAP7	NM_016377;NM_004842;NM_138633	3'UTR;3'UTR;3'UTR					TRUE	6:131602149-131603267	Unclassified_Cell_type_specific	NA
cg00665650	-1.21983	2.5313e-06	3.29884e-05	37	5	138676787	F	PAIP2;PAIP2	NM_001033112;NM_016480	TSS1500;TSS1500	chr5:138677333-138678248	N_Shore			NA			NA
cg00666109	2.47083	3.58425e-14	2.01304e-12	37	1	213434284	R	RPS6KC1;RPS6KC1	NM_012424;NM_001136138	Body;Body					TRUE			NA
cg00666915	-0.311171	0.000765137	0.00540763	37	17	27169116	R	C17orf63;C17orf63	NM_001077498;NM_018182	5'UTR;5'UTR	chr17:27169526-27169894	N_Shore		RDMR	NA	17:27169028-27170253	Promoter_Associated	NA
cg00667647	0.570974	5.987e-05	0.000570343	37	1	119542475	F				chr1:119543056-119543454	N_Shore		DMR	TRUE			NA
cg00667751	0.844217	0.000353433	0.00275086	37	6	28956320	R				chr6:28956106-28956578	Island			NA	6:28956010-28957008	Promoter_Associated	NA
cg00667865	-0.273176	0.0011765	0.00786487	37	3	179322195	F	MRPL47;NDUFB5;MRPL47	NM_177988;NM_002492;NM_020409	5'UTR;TSS1500;Body	chr3:179322346-179322788	N_Shore			NA	3:179321930-179323132	Promoter_Associated	TRUE
cg00668337	0.445695	0.000661561	0.00476319	37	11	64491331	F	NRXN2;NRXN2	NM_138732;NM_015080	TSS1500;TSS1500	chr11:64490493-64491146	S_Shore			NA	11:64490537-64492146	Unclassified	NA
cg00668515	1.46159	2.00782e-06	2.67354e-05	37	1	223213539	R								TRUE			NA
cg00668559	2.03183	6.66354e-18	7.62249e-16	37	6	44230977	F	NFKBIE	NM_004556	Body	chr6:44232880-44233447	N_Shore			TRUE			TRUE
cg00668619	-2.45658	4.29082e-07	6.54454e-06	37	7	105332279	F	ATXN7L1	NM_020725	Body					NA	7:105332180-105332857	Promoter_Associated	TRUE
cg00669330	-1.68454	7.93702e-12	2.92866e-10	37	2	242810917	R	C2orf85	NM_173821	TSS1500	chr2:242808405-242808618	S_Shelf			TRUE			NA
cg00669347	0.584617	0.00045611	0.00344234	37	16	86767757	R								TRUE			NA
cg00670552	-3.58038	4.93575e-25	2.52233e-22	37	12	131750193	F								NA			NA
cg00670721	1.24693	2.30042e-06	3.0259e-05	37	3	186504202	R	SNORA63;MIR1248;EIF4A2;SNORA81;SNORA4	NR_002586;NR_031650;NM_001967;NR_002989;NR_002588	TSS1500;TSS1500;Body;TSS1500;TSS1500	chr3:186500738-186502048	S_Shelf			NA			NA
cg00670913	-1.04007	1.34303e-09	3.30712e-08	37	11	98890591	R	CNTN5;CNTN5	NM_175566;NM_014361	TSS1500;TSS1500	chr11:98891543-98891821	N_Shore			NA			NA
cg00672332	0.789665	8.57867e-07	1.23318e-05	37	2	220156225	F	PTPRN	NM_002846	Body	chr2:220159438-220159977	N_Shelf			NA			NA
cg00672414	-0.66407	2.94305e-07	4.63984e-06	37	3	43776590	F								TRUE			NA
cg00673646	1.06608	0.000890867	0.00617467	37	11	59950525	R	MS4A6A;MS4A6A;MS4A6A;MS4A6A;MS4A6A;MS4A6A	NM_152852;NM_022349;NM_152852;NM_152851;NM_152851;NM_022349	1stExon;5'UTR;5'UTR;1stExon;5'UTR;1stExon			low-CpG:59707048-59707155		NA			NA
cg00674004	0.934642	0.000181834	0.00152873	37	10	101280750	F				chr10:101281181-101282116	N_Shore			TRUE			NA
cg00674415	-1.73356	0.000425702	0.0032414	37	16	1859330	F	HAGH;HAGH	NM_005326;NM_001040427	Body;Body					NA			NA
cg00674679	3.77292	1.36582e-21	3.38389e-19	37	2	176931680	F				chr2:176931575-176932663	Island			NA			NA
cg00674706	-2.3135	1.579e-07	2.62729e-06	37	6	29521145	F				chr6:29521110-29521833	Island		DMR	TRUE	6:29520150-29521356	Unclassified_Cell_type_specific	NA
cg00675121	-1.57312	7.08798e-08	1.26311e-06	37	10	128214096	R								NA			NA
cg00675160	-1.76652	1.23316e-08	2.54589e-07	37	16	1208531	F	CACNA1H;CACNA1H	NM_021098;NM_001005407	Body;Body	chr16:1208357-1208721	Island			NA			NA
cg00675336	-0.836612	8.73801e-07	1.2545e-05	37	4	189330030	R								TRUE			NA
cg00675569	-1.91688	2.09445e-09	4.97394e-08	37	10	45914840	R	ALOX5	NM_000698	Body	chr10:45914374-45914883	Island			TRUE	10:45914018-45915182	Promoter_Associated	TRUE
cg00675721	-0.77615	0.000221903	0.00182232	37	19	39739215	F				chr19:39737689-39739288	Island			NA			NA
cg00675891	-1.15779	2.12862e-06	2.81956e-05	37	13	113698994	F	MCF2L;MCF2L	NM_001112732;NM_024979	Body;Body	chr13:113701833-113702280	N_Shelf	low-CpG:112746908-112747037		NA			TRUE
cg00676030	1.74894	4.09236e-10	1.10941e-08	37	8	38307962	F	FGFR1;FGFR1;FGFR1;FGFR1;FGFR1;FGFR1;FGFR1	NM_023106;NM_023108;NM_023105;NM_023111;NM_023107;NM_015850;NM_023110	Body;Body;Body;Body;Body;Body;Body					TRUE			NA
cg00676801	0.809567	4.82475e-09	1.07476e-07	37	2	191876673	R	STAT1;STAT1	NM_139266;NM_007315	5'UTR;5'UTR	chr2:191878608-191879253	N_Shore			NA			NA
cg00677574	1.94464	2.06383e-09	4.9098e-08	37	17	43221327	R	ACBD4;ACBD4;ACBD4;ACBD4	NM_001135704;NM_001135706;NM_024722;NM_001135705	3'UTR;3'UTR;3'UTR;3'UTR	chr17:43221927-43222388	N_Shore			TRUE	17:43221108-43222234	Unclassified	TRUE
cg00677730	1.61257	2.42933e-17	2.48293e-15	37	9	130672636	R	ST6GALNAC4;ST6GALNAC4	NM_175039;NM_175040	Body;Body	chr9:130674546-130674958	N_Shore			NA			NA
cg00677866	0.937155	7.60831e-10	1.96063e-08	37	20	61051685	R	GATA5	NM_080473	TSS1500	chr20:61049361-61051897	Island		DMR	NA			TRUE
cg00678236	-1.17633	8.07114e-05	0.000744573	37	13	46785423	R							RDMR	NA	13:46785204-46786685	Promoter_Associated	NA
cg00678286	0.768519	1.1062e-05	0.000125458	37	7	155623836	R				chr7:155623658-155623894	Island			NA			NA
cg00679556	1.96243	0.000258348	0.00208484	37	6	30080782	F	TRIM31	NM_007028	5'UTR					NA			NA
cg00679731	2.02854	9.20819e-14	4.80197e-12	37	2	176979345	F				chr2:176980765-176981423	N_Shore		CDMR	NA	2:176978952-176979416	Unclassified_Cell_type_specific	NA
cg00679763	1.06433	3.24639e-06	4.13786e-05	37	17	46993161	R	UBE2Z	NM_023079	Body					TRUE	17:46992987-46993247	Unclassified_Cell_type_specific	TRUE
cg00682069	0.868673	3.2325e-06	4.12177e-05	37	2	1667458	R	PXDN	NM_012293	Body	chr2:1669991-1670203	N_Shelf			NA			NA
cg00682553	3.14354	9.65322e-16	7.21125e-14	37	22	50720813	F	PLXNB2	NM_012401	Body	chr22:50718979-50721884	Island			NA			NA
cg00682734	1.0228	2.37211e-06	3.11113e-05	37	20	55200973	F				chr20:55200279-55206789	Island		RDMR	NA			NA
cg00683332	-0.753358	0.000733489	0.0052121	37	16	51188697	R				chr16:51183699-51188763	Island		RDMR	NA			NA
cg00684101	2.52803	6.47342e-19	9.01908e-17	37	2	74978584	F				chr2:74981752-74981972	N_Shelf			NA			NA
cg00684125	1.28156	5.88798e-08	1.06566e-06	37	7	21209165	R								TRUE			NA
cg00685480	0.579643	0.000193218	0.00161264	37	9	127950142	R	PPP6C;PPP6C;PPP6C	NM_001123369;NM_002721;NM_001123355	Body;Body;Body	chr9:127951391-127952263	N_Shore			NA			NA
cg00685622	0.900603	1.55525e-05	0.000170471	37	16	85373209	R								NA			NA
cg00686159	-2.65882	3.3344e-18	4.04095e-16	37	13	74291284	F	KLF12	NM_007249	Body					TRUE			NA
cg00686429	-0.95896	3.51785e-05	0.000355027	37	19	18207235	F	MAST3	NM_015016	TSS1500	chr19:18209911-18210268	N_Shelf			NA			NA
cg00686694	0.994341	1.24649e-14	7.60619e-13	37	4	2793774	R	SH3BP2	NM_001122681	TSS1500	chr4:2794494-2794875	N_Shore			NA	4:2793544-2793875	Unclassified_Cell_type_specific	NA
cg00687306	0.794809	1.3178e-05	0.000146932	37	15	37398943	R								TRUE	15:37398123-37398951	Unclassified_Cell_type_specific	NA
cg00687612	3.99814	1.09509e-26	8.42609e-24	37	14	104625920	F	KIF26A	NM_015656	Body	chr14:104625248-104625522	S_Shore			NA			NA
cg00688125	0.406264	3.37417e-07	5.25713e-06	37	2	27664399	R	KRTCAP3;NRBP1;KRTCAP3	NM_173853;NM_013392;NM_001168364	TSS1500;Body;TSS1500	chr2:27664939-27665151	N_Shore			NA			NA
cg00688785	3.31729	1.154e-24	5.428e-22	37	2	176985953	F	HOXD9	NM_014213	TSS1500	chr2:176986424-176988291	N_Shore		RDMR	NA			NA
cg00688810	0.963615	3.26325e-07	5.10009e-06	37	17	7517138	F	SHBG;FXR2	NR_027463;NM_004860	TSS1500;Body	chr17:7517690-7518748	N_Shore			NA	17:7516997-7518931	Promoter_Associated	NA
cg00688840	-1.38402	0.000103582	0.000930587	37	14	106363051	R								NA			NA
cg00689010	-1.38083	6.66398e-06	7.93946e-05	37	1	160311893	R	COPA;COPA;NCSTN	NM_004371;NM_001098398;NM_015331	Body;Body;TSS1500	chr1:160312928-160313338	N_Shore			NA			NA
cg00689067	-0.948826	2.01792e-08	3.99261e-07	37	12	30952032	R				chr12:30948548-30949757	S_Shelf			NA			NA
cg00689340	0.616335	0.000591864	0.00432212	37	2	74668672	R	RTKN;RTKN;RTKN	NM_001015055;NM_033046;NM_001015056	Body;TSS1500;TSS1500	chr2:74667593-74669403	Island		RDMR	NA	2:74668598-74669615	Unclassified	NA
cg00689492	1.1708	0.0007834	0.00552236	37	4	1303491	R	MAEA;MAEA	NM_005882;NM_001017405	Body;Body	chr4:1303490-1303835	Island			TRUE	4:1302801-1303714	Promoter_Associated_Cell_type_specific	TRUE
cg00689534	-0.508703	0.000422928	0.00322293	37	15	79282030	F	RASGRF1;RASGRF1;RASGRF1	NM_153815;NM_001145648;NM_002891	Body;Body;Body					TRUE			NA
cg00689612	1.00236	1.14082e-05	0.000129041	37	17	76899627	R	TIMP2	NM_003255	Body	chr17:76897078-76897298	S_Shelf			TRUE			NA
cg00689772	0.463981	0.000954338	0.00655819	37	6	41454631	F								TRUE			NA
cg00690082	-0.743207	1.81187e-07	2.98131e-06	37	17	40438511	R	STAT5A	NM_003152	TSS1500	chr17:40440188-40441014	N_Shore			NA			NA
cg00690195	0.624441	2.81234e-06	3.62857e-05	37	8	8915582	F								TRUE			TRUE
cg00691586	-0.940251	4.81117e-08	8.87307e-07	37	15	86160762	F	AKAP13;AKAP13	NM_007200;NM_006738	Body;Body					TRUE			NA
cg00691671	0.822887	3.74885e-05	0.00037569	37	1	65435148	F				chr1:65431455-65432614	S_Shelf			NA			NA
cg00691830	1.26923	0.00103634	0.00704738	37	15	37388540	R	MEIS2;MEIS2;MEIS2;MEIS2;MEIS2;MEIS2;MEIS2	NM_172316;NM_170674;NM_170675;NM_172315;NM_002399;NM_170677;NM_170676	Body;Body;Body;Body;Body;Body;Body	chr15:37390175-37390380	N_Shore		RDMR	NA			NA
cg00691906	0.701816	0.0012719	0.00841557	37	6	12203060	F								TRUE			NA
cg00691948	0.990125	1.09435e-06	1.53949e-05	37	17	78958651	F				chr17:78954993-78955381	S_Shelf			NA	17:78957787-78958826	Unclassified	TRUE
cg00691999	0.525868	0.000979551	0.00670795	37	4	55094011	R	PDGFRA	NM_006206	TSS1500	chr4:55094321-55094593	N_Shore		DMR	NA	4:55093545-55094994	Unclassified	NA
cg00692047	-0.337498	0.000551926	0.00406655	37	12	56413935	F	IKZF4	NM_022465	TSS1500					NA			NA
cg00692173	3.51112	6.56509e-17	6.14758e-15	37	1	53217358	F	ZYG11B	NM_024646	Body					TRUE			NA
cg00692367	0.567864	0.00111566	0.00750953	37	1	211665511	F	RD3;RD3;RD3;RD3	NM_001164688;NM_001164688;NM_183059;NM_183059	1stExon;5'UTR;1stExon;5'UTR					NA			NA
[truncated: 61,345 more rows]
