# Supplementary material for: DNA methylation defines regional identity of human intestinal epithelial organoids and undergoes dynamic changes during development
Source: Gut. 2017 Nov 15;68(1):49–61. doi: 10.1136/gutjnl-2017-314817 (PMC6839835; doi:10.1136/gutjnl-2017-314817)
Supplement: Supplementary file 5 [file gutjnl-2017-314817supp005.xls]

## Sheet: FPGoFpGp_&_TIpFpGp_dmps001_over
Supplementary Table S15. Maturation DMPs in foetal proximal gut (FPG)
Overlapping differentially methylated positions (DMPs) comparing intestinal epithelial organoids (FPGo) vs purified IEC (FPGp), as well as DMPs comparing purified IEC from terminal ileum (TIp) vs IEC from foetal proximal gut (FPGp), using a cut-off of adjusted p<0.01. Annotation based on Illumina Infinium Human Methylation450 BeadChip v 1-2
Column Name	Description
IlmnID	Unique CpG locus identifier from the Illumina CG database
logFC.x	Log Fold change comparing the contrast FPGo- FPGp using limma Bioconductor package
P.Value.x/ adj. P-Val.x	P-values for the comparison FPGo- FPGp using limma Bioconductor package
logFC.y	Log Fold change comparing the contrast TIp- FPGp using limma Bioconductor package
P.Value.x/ adj. P-Val.x	P-values for the comparison TIp- FPGp using limma Bioconductor package
Genome_Build	Genome build on which forward sequence is based
CHR	Chromosome - genome build 37
MAPINFO	Coordinates - genome build 37
Strand	Design strand
UCSC_RefGene_Name	Gene name (UCSC)
UCSC_RefGene_Accession	Accession number (UCSC)
UCSC_RefGene_Group	Gene region feature category (UCSC)
UCSC_CpG_Islands_Name	CpG island name (UCSC)
Relation_to_UCSC_CpG_Island	Relationship to Canonical CpG Island: Shores - 0-2 kb from CpG island; Shelves - 2-4 kb from CpG island.
Phantom	FANTOM-derived promoter
DMR	Differentially methylated region (experimentally determined)
Enhancer	Enhancer element (informatically-determined)
Regulatory_Feature_Name	Regulatory feature (informatically determined)
Regulatory_Feature_Group	Regulatory feature category
DHS	DNAse hypersensitive site (experimentally determined)
IlmnID	logFC.x	P.Value.x	adj.P.Val.x	logFC.y	P.Value.y	adj.P.Val.y	Genome_Build	CHR	MAPINFO	Strand	UCSC_RefGene_Name	UCSC_RefGene_Accession	UCSC_RefGene_Group	UCSC_CpG_Islands_Name	Relation_to_UCSC_CpG_Island	Phantom	DMR	Enhancer	Regulatory_Feature_Name	Regulatory_Feature_Group	DHS
cg00019308	0.506565	2.50296e-05	0.00326657	0.562285	8.00116e-07	1.8069e-05	37	1	234906904	R								TRUE			NA
cg00030296	-0.860981	7.12697e-05	0.00699496	-0.953682	3.26665e-06	6.11219e-05	37	17	75318732	R	SEPT9;SEPT9;SEPT9	NM_001113492;NM_001113491;NM_006640	5'UTR;Body;Body					TRUE			NA
cg00031277	-1.34619	8.38652e-05	0.00784237	-1.1206	0.000364754	0.00360436	37	4	101943443	F								TRUE			NA
cg00035347	-1.57623	7.92178e-05	0.00752963	-2.36925	2.29367e-09	1.16528e-07	37	10	104953608	F	NT5C2;NT5C2	NM_012229;NM_001134373	TSS1500;TSS1500	chr10:104952242-104953232	S_Shore			NA			NA
cg00044372	-1.69122	1.29205e-05	0.00198456	-1.43628	5.51445e-05	0.000709241	37	16	85070825	F	KIAA0513	NM_014732	5'UTR					TRUE			TRUE
cg00061635	-1.97447	3.2011e-05	0.00388476	-3.17661	4.23608e-11	4.00346e-09	37	17	8311836	F								NA			NA
cg00092644	1.21423	8.40619e-06	0.00144117	1.51102	1.05029e-08	4.30336e-07	37	1	95360379	F	SLC44A3;SLC44A3	NM_001114106;NM_152369	Body;Body					TRUE			NA
cg00102183	0.707722	6.39437e-05	0.00643229	0.730678	1.07263e-05	0.000171673	37	1	109772439	R	SARS	NM_006513	Body					TRUE			NA
cg00111948	-0.870817	3.57051e-05	0.00421316	-1.11981	4.0999e-08	1.38613e-06	37	1	27691978	F	MAP3K6	NM_004672	Body	chr1:27692412-27693243	N_Shore		RDMR	NA			NA
cg00115149	-2.4844	6.60489e-06	0.00120031	-4.14767	4.08822e-13	8.47235e-11	37	10	111735487	R								TRUE			NA
cg00115288	-1.14874	2.12735e-07	8.94372e-05	-1.11795	6.5236e-08	2.07079e-06	37	11	705892	R	EPS8L2	NM_022772	TSS1500	chr11:705794-706534	Island			NA	11:705629-707129	Unclassified_Cell_type_specific	NA
cg00118507	1.21665	5.62295e-06	0.00106456	1.32525	1.82311e-07	5.02965e-06	37	1	113215934	F	MOV10;MOV10	NM_001130079;NM_020963	TSS1500;TSS1500	chr1:113217475-113218097	N_Shore			TRUE			NA
cg00136405	-1.62619	8.52737e-05	0.00792682	-1.63239	2.43396e-05	0.000349931	37	4	123542198	R	IL21;IL21	NM_021803;NM_021803	5'UTR;1stExon					NA			NA
cg00151922	-1.86875	1.25351e-08	9.17751e-06	-2.03581	9.67704e-11	8.02101e-09	37	20	10652103	R	JAG1	NM_000214	Body	chr20:10652573-10655611	N_Shore			NA			NA
cg00157012	-1.27018	5.28592e-05	0.00560778	-1.11445	0.000120043	0.00138707	37	8	25059252	F	DOCK5	NM_024940	Body				DMR	NA			NA
cg00160667	2.1452	6.9107e-06	0.00123714	1.78796	4.30941e-05	0.0005748	37	1	29587357	F	PTPRU;PTPRU;PTPRU	NM_133178;NM_133177;NM_005704	Body;Body;Body	chr1:29587087-29587412	Island			NA			NA
cg00162064	-2.21136	2.48954e-06	0.000574233	-3.2169	1.05424e-11	1.25014e-09	37	1	44998151	F	RNF220	NM_018150	Body					TRUE			NA
cg00163372	-2.59612	3.43399e-06	0.000733574	-4.12285	7.52728e-13	1.39852e-10	37	8	128752988	F	MYC	NM_002467	Body	chr8:128747805-128751279	S_Shore			NA			NA
cg00173854	-0.973607	1.93138e-05	0.00268722	-1.10125	3.74194e-07	9.37852e-06	37	6	32939137	F	BRD2;BRD2	NM_001113182;NM_005104	5'UTR;5'UTR	chr6:32939275-32940954	N_Shore			NA			NA
cg00177875	0.750851	7.52689e-05	0.00725993	0.971921	1.15327e-07	3.38522e-06	37	11	75478404	R	DGAT2	NM_032564	TSS1500	chr11:75479462-75480172	N_Shore			NA			NA
cg00182421	-2.66259	9.34325e-06	0.0015571	-3.41932	5.12742e-09	2.33066e-07	37	3	170586396	R	RPL22L1	NM_001099645	Body	chr3:170587936-170588270	N_Shore			NA			NA
cg00205703	-1.04837	1.50475e-05	0.00222819	-1.53667	2.1038e-10	1.53973e-08	37	3	184054901	R	FAM131A;FAM131A	NM_001171093;NM_144635	5'UTR;TSS1500	chr3:184056419-184056671	N_Shore			TRUE			NA
cg00207731	-1.29954	1.44861e-05	0.00216868	-2.15098	2.93549e-12	4.30149e-10	37	15	91416118	R	FURIN	NM_002569	5'UTR	chr15:91414311-91415427	S_Shore			TRUE	15:91416104-91416970	Promoter_Associated	TRUE
cg00211115	-1.66726	1.40658e-05	0.00211899	-1.73922	1.4648e-06	3.04864e-05	37	11	69257736	R				chr11:69258149-69258544	N_Shore			NA	11:69256847-69259657	Unclassified	TRUE
cg00211661	-1.98959	1.19746e-05	0.00188036	-2.51922	1.11719e-08	4.53328e-07	37	11	72433619	F	ARAP1;ARAP1;ARAP1	NM_001040118;NM_001135190;NM_015242	Body;TSS1500;TSS1500					TRUE	11:72432591-72434003	Promoter_Associated	NA
cg00225196	-1.44673	1.90328e-05	0.00265628	-1.24719	6.17082e-05	0.0007818	37	8	37556863	R				chr8:37557927-37558887	N_Shore		RDMR	NA	8:37556823-37557156	Unclassified_Cell_type_specific	NA
cg00230584	-2.34135	2.83047e-07	0.000111957	-2.33979	4.54503e-08	1.51788e-06	37	5	97833812	F								TRUE			NA
cg00232535	-1.77145	2.38335e-05	0.00314975	-2.09305	1.81176e-07	5.00232e-06	37	7	5593287	R				chr7:5594653-5596540	N_Shore			NA			NA
cg00232831	-2.76683	0.000112406	0.00966262	-3.98512	1.49752e-08	5.84507e-07	37	2	161113856	F								TRUE			NA
cg00240195	1.99513	3.6061e-06	0.000761959	2.55585	1.25899e-09	6.97865e-08	37	2	157184880	F	NR4A2	NM_006186	Body	chr2:157185557-157186355	N_Shore		RDMR	NA			NA
cg00241281	0.883016	4.63803e-06	0.000919945	1.01427	3.81099e-08	1.30162e-06	37	14	105779794	R	PACS2;PACS2	NM_015197;NM_001100913	TSS1500;TSS1500	chr14:105780339-105782027	N_Shore			NA			NA
cg00241638	-1.45797	7.20516e-05	0.0070445	-2.41092	9.56706e-11	7.94438e-09	37	8	144097644	F	LOC100133669	NR_026913	Body	chr8:144099456-144099731	N_Shore			NA	8:144096490-144098064	Unclassified	TRUE
cg00245075	-2.09138	2.9108e-09	2.98977e-06	-3.03403	1.49897e-16	1.3706e-13	37	12	51756242	R	GALNT6	NM_007210	Body					TRUE			NA
cg00247963	-2.19676	5.47606e-07	0.000184406	-2.16011	1.39851e-07	3.99272e-06	37	16	20863151	R								TRUE			NA
cg00260201	-2.11196	1.18855e-05	0.00187069	-2.91328	9.27259e-10	5.38507e-08	37	17	46029581	F	PRR15L	NM_024320	3'UTR					NA			NA
cg00271177	-1.38367	2.18864e-06	0.000525026	-1.98089	1.48133e-11	1.66462e-09	37	3	193849983	F				chr3:193851699-193852042	N_Shore			TRUE			NA
cg00282731	0.574522	8.3365e-05	0.00780813	0.515912	0.0001322	0.00150642	37	17	74018510	F	EVPL	NM_001988	Body	chr17:74017769-74018658	Island			NA			NA
cg00294109	-1.96216	1.36603e-05	0.00207333	-3.29734	1.4737e-12	2.4282e-10	37	3	3219781	R	CRBN	NM_016302	Body	chr3:3221083-3221617	N_Shore			NA			NA
cg00294534	-2.42322	1.75694e-07	7.60604e-05	-2.4432	2.12214e-08	7.88678e-07	37	7	1607247	R	PSMG3;PSMG3	NM_001134340;NM_032302	3'UTR;3'UTR	chr7:1609568-1610037	N_Shelf			TRUE			TRUE
cg00300298	-1.93789	3.07204e-07	0.000119427	-2.59705	6.13204e-12	7.93612e-10	37	20	30308956	F	BCL2L1;BCL2L1	NM_138578;NM_001191	Body;Body	chr20:30310503-30310707	N_Shore			TRUE	20:30308686-30309043	Promoter_Associated	NA
cg00316341	-1.41901	1.36611e-05	0.00207333	-1.61524	2.03405e-07	5.53179e-06	37	10	16898311	R	CUBN	NM_001081	Body					TRUE	10:16898199-16898407	Unclassified_Cell_type_specific	NA
cg00325139	-1.68557	8.6591e-05	0.00800185	-1.32849	0.000720497	0.00641966	37	6	57178623	F								TRUE			TRUE
cg00326642	0.681048	1.8789e-05	0.00263036	0.583945	6.62491e-05	0.000830771	37	3	140949072	F				chr3:140949911-140950963	N_Shore			TRUE			NA
cg00328720	-2.20172	1.36454e-07	6.17608e-05	-1.49239	6.10392e-05	0.000774303	37	8	28562890	F	EXTL3	NM_001440	5'UTR	chr8:28558588-28559960	S_Shelf			NA			NA
cg00339415	-2.52439	4.72241e-10	6.78104e-07	-2.85156	4.69612e-13	9.53959e-11	37	9	136085771	R	OBP2B	NM_014581	TSS1500					NA			NA
cg00341935	0.869076	0.000101763	0.00900786	0.951115	6.53036e-06	0.000111754	37	8	27279932	R	PTK2B;PTK2B;PTK2B;PTK2B	NM_173176;NM_173175;NM_173174;NM_004103	Body;Body;Body;Body			low-CpG:27335783-27335954		NA			NA
cg00348763	-1.56327	5.26323e-08	2.95236e-05	-1.11224	1.46838e-05	0.000225481	37	19	40696613	R	MAP3K10	NM_002446	TSS1500	chr19:40696811-40698193	N_Shore			NA	19:40696575-40697539	Promoter_Associated	NA
cg00351537	1.04653	3.27839e-05	0.00394494	1.30315	8.09456e-08	2.49221e-06	37	19	7580275	F	ZNF358	NM_018083	TSS1500	chr19:7580824-7581415	N_Shore			NA	19:7580145-7580291	Unclassified_Cell_type_specific	NA
cg00352106	-2.27587	4.38908e-06	0.000880848	-2.92545	1.53943e-09	8.28542e-08	37	1	39864197	R	MACF1;MACF1	NM_012090;NM_033044	Body;Body					TRUE			TRUE
cg00368356	-0.904957	9.44103e-05	0.00850097	-1.57735	2.98863e-11	2.97628e-09	37	19	39395717	R	NFKBIB;NFKBIB	NM_001001716;NM_002503	Body;Body	chr19:39395881-39396106	N_Shore			NA			NA
cg00373436	-2.47298	2.91151e-08	1.87074e-05	-3.3387	1.20066e-13	3.05259e-11	37	3	111721343	R	TAGLN3;TAGLN3;TAGLN3	NM_001008272;NM_001008273;NM_013259	Body;Body;Body					TRUE			NA
cg00377497	-2.02094	3.21476e-07	0.000124147	-2.5907	3.14287e-11	3.10108e-09	37	8	27167110	F	TRIM35	NM_171982	Body	chr8:27168205-27169082	N_Shore			NA			NA
cg00388503	-1.9726	0.000109015	0.0094468	-2.71476	4.68412e-08	1.55833e-06	37	2	64372160	R	PELI1	NM_020651	TSS1500	chr2:64370888-64371811	S_Shore			NA			NA
cg00390511	-2.17703	3.14079e-06	0.000686034	-1.80268	2.45299e-05	0.000352282	37	7	36701016	R	AOAH	NM_001637	Body			low-CpG:36667431-36667575		NA			NA
cg00395063	-1.16179	5.71651e-06	0.00107877	-1.3638	2.88168e-08	1.02384e-06	37	11	120210293	F	ARHGEF12	NM_015313	Body	chr11:120206460-120207649	S_Shelf			NA			NA
cg00400165	-2.00148	2.98909e-05	0.00369831	-1.50297	0.000572095	0.00528073	37	11	64659060	F	MIR192;MIR194-2	NR_029578;NR_029829	TSS1500;TSS200	chr11:64662462-64662880	N_Shelf			NA			NA
cg00406023	1.31951	6.10543e-06	0.00112968	1.70281	2.29026e-09	1.16384e-07	37	11	120090023	F	OAF	NM_178507	Body					TRUE			NA
cg00407062	-1.00246	4.32979e-06	0.000873679	-0.742019	0.00017266	0.0018966	37	9	130964374	R	CIZ1;DNM1;DNM1;CIZ1	NM_012127;NM_001005336;NM_004408;NM_001131015	5'UTR;TSS1500;TSS1500;5'UTR	chr9:130965464-130966516	N_Shore			NA			NA
cg00410422	-1.65198	2.05941e-05	0.00282184	-2.28969	2.07269e-09	1.06777e-07	37	1	110951074	F	HBXIP	NM_006402	TSS1500	chr1:110949892-110950540	S_Shore			NA			NA
cg00411097	-1.41355	1.36652e-06	0.000371975	-1.60158	1.08382e-08	4.41811e-07	37	7	1596050	R	TMEM184A;TMEM184A	NM_001097620;NM_001097620	1stExon;5'UTR					TRUE	7:1594906-1596387	Unclassified_Cell_type_specific	NA
cg00417094	-1.48889	2.10467e-05	0.00286289	-1.19358	0.000191511	0.00207528	37	1	167417043	R	CD247;CD247	NM_198053;NM_000734	Body;Body					NA	1:167416677-167417434	Promoter_Associated_Cell_type_specific	NA
cg00417304	-1.70906	3.24123e-07	0.000124932	-3.04644	4.83387e-17	5.6002e-14	37	11	45124456	R	PRDM11	NM_020229	Body					TRUE	11:45123798-45125253	Unclassified	NA
cg00425213	-2.07095	4.2541e-06	0.000862247	-1.78467	1.61966e-05	0.000245686	37	1	6446095	F	ACOT7;ACOT7	NM_007274;NM_181864	Body;TSS1500					TRUE			TRUE
cg00439790	-1.4757	8.4186e-05	0.00785795	-2.6079	1.41007e-11	1.60087e-09	37	12	57532315	R	LRP1	NM_002332	Body					TRUE			NA
cg00442282	-3.28669	5.06276e-17	2.94945e-12	-3.12501	1.52661e-17	2.19985e-14	37	17	38471064	F	RARA	NM_000964	5'UTR	chr17:38472958-38473201	N_Shore			TRUE	17:38470871-38471273	Unclassified	TRUE
cg00443981	1.19507	1.80827e-06	0.00045799	1.23367	1.66458e-07	4.64852e-06	37	17	58499679	F	C17orf64	NM_181707	TSS200	chr17:58498711-58499332	S_Shore			TRUE			NA
cg00453735	-2.11293	2.27413e-05	0.00303667	-1.83513	6.4636e-05	0.000813494	37	10	33321730	F								TRUE			TRUE
cg00466116	-3.33893	1.7313e-13	1.32243e-09	-4.50172	4.28906e-21	3.56958e-17	37	1	59221344	F								TRUE	1:59220970-59221465	Unclassified_Cell_type_specific	TRUE
cg00468395	-3.16747	3.66272e-08	2.22936e-05	-3.50992	2.07348e-10	1.52137e-08	37	16	28193063	F	XPO6	NM_015171	Body					TRUE			TRUE
cg00483992	-1.46833	6.0372e-05	0.00618747	-2.81596	2.96376e-13	6.45164e-11	37	1	35449536	F				chr1:35450649-35451037	N_Shore			NA			NA
cg00486915	-1.64277	9.62814e-05	0.00862884	-2.17831	9.60355e-08	2.88988e-06	37	3	152877614	F				chr3:152878268-152881086	N_Shore			NA			NA
cg00491021	1.7463	2.76833e-05	0.00351693	1.77729	5.28114e-06	9.27626e-05	37	8	42064880	F	PLAT;PLAT	NM_033011;NM_000930	5'UTR;5'UTR					TRUE			NA
cg00502597	-1.18376	8.03692e-07	0.000245873	-1.06699	1.46021e-06	3.03986e-05	37	1	60197222	F	FGGY;FGGY	NM_018291;NM_001113411	Body;Body					TRUE			NA
cg00506442	0.82563	1.14061e-05	0.00181131	0.654714	0.000136862	0.00155152	37	1	6340054	R	ACOT7;ACOT7;ACOT7;ACOT7	NM_181864;NM_181865;NM_007274;NM_181866	Body;Body;Body;Body	chr1:6339948-6340268	Island			NA			NA
cg00514353	1.16944	2.64421e-05	0.00339521	1.61898	3.3128e-09	1.59859e-07	37	5	141233646	R	PCDH1	NM_032420	Body	chr5:141233566-141233894	Island			NA			NA
cg00514486	-1.49383	4.55541e-07	0.000160481	-1.22155	6.04148e-06	0.000104338	37	3	49837348	R	CDH29	NM_001007540	TSS200	chr3:49840103-49841191	N_Shelf			NA			NA
cg00514628	-1.12626	4.50863e-06	0.000900409	-1.43558	2.06013e-09	1.06278e-07	37	22	30819337	F	SEC14L2	NM_012429	3'UTR	chr22:30819399-30820297	N_Shore			NA	22:30819181-30820706	Promoter_Associated	TRUE
cg00516092	-1.50473	7.68253e-07	0.000238098	-1.51129	1.21611e-07	3.54061e-06	37	20	31177275	R				chr20:31170740-31173640	S_Shelf			NA			TRUE
cg00530414	-1.50153	2.12839e-05	0.00288553	-1.45493	9.81017e-06	0.000158988	37	16	18800193	R	RPS15A;RPS15A	NM_001019;NM_001030009	Body;Body	chr16:18801251-18801866	N_Shore		RDMR	NA			NA
cg00530638	-1.04694	0.000110596	0.00953925	-1.72619	2.7065e-10	1.90955e-08	37	5	98108543	R	RGMB	NM_001012761	Body	chr5:98108678-98110307	N_Shore		RDMR	NA	5:98108467-98109699	Unclassified	NA
cg00535514	-3.08736	2.25403e-05	0.0030178	-4.21356	3.7973e-09	1.80085e-07	37	19	44205563	F				chr19:44203558-44203987	S_Shore			NA	19:44205392-44205878	Promoter_Associated_Cell_type_specific	TRUE
cg00540558	-0.888814	4.85822e-07	0.000168463	-0.931293	2.46e-08	8.94843e-07	37	19	40930735	F	SERTAD1	NM_013376	5'UTR	chr19:40931261-40932113	N_Shore			NA	19:40930613-40932386	Promoter_Associated	NA
cg00543474	-1.35379	5.47479e-06	0.00104134	-1.24191	6.66727e-06	0.000113776	37	10	134260981	R	C10orf91	NM_173541	Body					TRUE	10:134260247-134262214	Promoter_Associated_Cell_type_specific	TRUE
cg00548098	-2.1202	1.98483e-05	0.00274085	-2.63047	4.14598e-08	1.40055e-06	37	16	11295667	R								TRUE			TRUE
cg00559635	1.60291	6.49935e-09	5.55652e-06	1.50476	4.55115e-09	2.105e-07	37	4	3415930	F	RGS12;RGS12;RGS12	NM_198229;NM_198227;NM_002926	Body;Body;Body	chr4:3414681-3415353	S_Shore			NA	4:3415557-3416048	Unclassified_Cell_type_specific	TRUE
cg00559992	-1.86428	1.63254e-05	0.00236419	-2.15083	1.88371e-07	5.17155e-06	37	5	67581342	F	PIK3R1	NM_181523	Body	chr5:67584213-67584451	N_Shelf			NA			NA
cg00569813	-2.64911	1.85956e-10	3.17295e-07	-3.36375	1.0766e-15	6.54309e-13	37	8	8483549	R								TRUE			TRUE
cg00573504	1.94404	1.74001e-05	0.00248454	3.1506	9.25165e-12	1.11954e-09	37	5	1123809	R								NA			NA
cg00576774	-2.32399	3.63009e-05	0.00426987	-3.30236	2.72623e-09	1.35038e-07	37	7	28725676	F	CREB5;CREB5;CREB5;CREB5	NM_001011666;NM_004904;NM_182899;NM_182898	TSS200;Body;Body;Body					TRUE	7:28725525-28725743	Unclassified_Cell_type_specific	TRUE
cg00581764	-1.11737	5.26217e-05	0.00559858	-2.68174	1.12415e-17	1.73648e-14	37	6	158183853	F								TRUE	6:158183733-158183866	Unclassified_Cell_type_specific	NA
cg00582531	-1.70703	4.56437e-06	0.000910205	-3.11647	4.70644e-15	2.16382e-12	37	5	133867864	F	PHF15	NM_015288	5'UTR					TRUE			NA
cg00583861	-2.20969	2.15383e-05	0.00291131	-2.34048	1.78242e-06	3.61109e-05	37	1	32014363	F								TRUE	1:32014257-32015344	Unclassified	TRUE
cg00586275	-0.754691	2.78232e-05	0.00352812	-0.819424	1.46494e-06	3.04879e-05	37	17	4850024	R	PFN1	NM_005022	Body	chr17:4850942-4853907	N_Shore		RDMR	NA			NA
cg00589493	-1.17263	3.70762e-05	0.00433108	-0.90264	0.000498722	0.00469908	37	11	64658940	R	MIR192;MIR194-2	NR_029578;NR_029829	TSS1500;TSS200	chr11:64662462-64662880	N_Shelf			NA			NA
cg00595472	-2.00774	4.0092e-05	0.00459688	-3.51147	3.62417e-12	5.14606e-10	37	11	61525251	R	DKFZP434K028;C11orf9;C11orf9	NR_026882;NM_013279;NM_001127392	TSS200;Body;Body					NA			NA
cg00602295	-1.57897	3.00199e-05	0.00370864	-1.75996	9.27191e-07	2.04972e-05	37	16	81328089	R							DMR	NA			NA
cg00618323	-0.887003	0.00011224	0.00965046	-1.22748	4.28274e-08	1.44011e-06	37	5	176515533	F	FGFR4;FGFR4;FGFR4	NM_002011;NM_022963;NM_213647	5'UTR;TSS1500;5'UTR	chr5:176513886-176514433	S_Shore			NA	5:176515347-176515581	Unclassified_Cell_type_specific	NA
cg00652332	1.49305	3.6859e-07	0.000137523	0.912878	0.000448942	0.00429989	37	16	88598320	F	ZFPM1	NM_153813	Body	chr16:88598447-88599162	N_Shore			NA	16:88598246-88598383	Unclassified_Cell_type_specific	NA
cg00670721	-1.4676	9.63306e-05	0.00863005	-1.59016	7.33404e-06	0.00012363	37	3	186504202	R	SNORA63;MIR1248;EIF4A2;SNORA81;SNORA4	NR_002586;NR_031650;NM_001967;NR_002989;NR_002588	TSS1500;TSS1500;Body;TSS1500;TSS1500	chr3:186500738-186502048	S_Shelf			NA			NA
cg00675650	-1.46472	5.41174e-07	0.000182542	-1.02848	8.7798e-05	0.00105957	37	3	172429335	F	NCEH1;NCEH1;NCEH1;NCEH1	NM_020792;NM_001146278;NM_001146277;NM_001146276	TSS1500;TSS1500;TSS1500;TSS1500	chr3:172428416-172428950	S_Shore			NA	3:172428101-172429451	Promoter_Associated	NA
cg00691240	-1.07193	1.75683e-05	0.00250067	-1.00909	1.34432e-05	0.000208774	37	1	52498502	R	TXNDC12;KTI12	NM_015913;NM_138417	Body;1stExon	chr1:52498452-52499505	Island			NA	1:52498344-52498555	Promoter_Associated	NA
cg00692047	0.70571	1.84902e-06	0.000464881	0.888609	7.7118e-10	4.59647e-08	37	12	56413935	F	IKZF4	NM_022465	TSS1500					NA			NA
cg00694180	-1.73074	1.9255e-05	0.00268179	-1.5821	2.44062e-05	0.000350629	37	6	33243375	F	RPS18	NM_022551	Body	chr6:33244677-33245554	N_Shore			NA			NA
cg00696323	0.826578	8.55683e-05	0.00794334	0.723456	0.00019315	0.00209021	37	3	124520019	F	ITGB5	NM_002213	Body					TRUE			NA
cg00698688	-3.26665	2.05996e-05	0.00282184	-4.34773	6.65944e-09	2.9115e-07	37	19	49055432	F	SULT2B1;SULT2B1	NM_177973;NM_177973	1stExon;5'UTR					NA			NA
cg00700039	-1.69537	1.3673e-06	0.000371975	-1.55705	1.66041e-06	3.39478e-05	37	18	2659555	R	SMCHD1	NM_015295	Body	chr18:2654918-2656817	S_Shelf			NA	18:2659449-2659659	Promoter_Associated_Cell_type_specific	NA
cg00711291	0.961584	2.88194e-05	0.00360732	1.05466	1.2395e-06	2.63583e-05	37	17	71345538	R	SDK2	NM_001144952	Body					TRUE			NA
cg00714531	0.509819	2.51047e-05	0.00327229	0.508383	6.93854e-06	0.000117756	37	21	46955647	F	SLC19A1	NM_194255	Body	chr21:46957315-46957916	N_Shore			NA	21:46955530-46955775	Gene_Associated_Cell_type_specific	NA
cg00719771	1.02078	2.19555e-05	0.00295496	0.959181	1.74314e-05	0.000261817	37	6	23523214	F								TRUE			NA
cg00720829	-1.90745	3.11513e-06	0.000681889	-1.73373	4.57454e-06	8.18783e-05	37	6	30131219	R	TRIM15;TRIM15	NM_033229;NM_033229	5'UTR;1stExon					TRUE			NA
cg00724315	-2.07881	1.87568e-08	1.2899e-05	-1.16945	0.000281424	0.00288908	37	4	1941849	R	WHSC1;WHSC1;WHSC1;WHSC1;WHSC1;WHSC1	NM_133334;NM_001042424;NM_007331;NM_133330;NM_133331;NM_133335	Body;Body;3'UTR;Body;Body;Body					TRUE			TRUE
cg00739667	1.22809	1.44461e-05	0.00216508	1.23659	3.09764e-06	5.8415e-05	37	16	81731648	F	CMIP;CMIP	NM_030629;NM_198390	Body;Body					NA	16:81730097-81731680	Unclassified	NA
cg00742040	-1.42564	6.80082e-05	0.00672741	-2.18021	1.01185e-09	5.79498e-08	37	6	36566732	F	SFRS3	NM_003017	Body			low-CpG:36674686-36674718		NA			NA
cg00743788	-1.58496	3.54937e-07	0.000133899	-1.83303	1.00988e-09	5.78743e-08	37	22	50701157	F	MAPK12	NM_002969	TSS1500	chr22:50699469-50700358	S_Shore			NA	22:50700970-50701296	Unclassified_Cell_type_specific	NA
cg00754989	-2.24258	8.50943e-13	4.56603e-09	-2.73305	5.9749e-18	1.04128e-14	37	15	72530044	F								TRUE			TRUE
cg00770317	-1.44682	6.71491e-05	0.00667243	-2.41751	5.78479e-11	5.20534e-09	37	10	13424911	R								NA			NA
cg00776917	-1.39669	1.4009e-05	0.00211277	-2.66957	9.00371e-15	3.64556e-12	37	14	30691759	R								TRUE	14:30691629-30691830	Unclassified_Cell_type_specific	NA
cg00786406	-1.5079	2.27733e-06	0.000538295	-1.55967	2.07751e-07	5.63572e-06	37	1	114474389	F	HIPK1;HIPK1	NM_152696;NM_198268	5'UTR;5'UTR	chr1:114471965-114472899	S_Shore			NA	1:114473837-114474456	Promoter_Associated	NA
cg00795584	-1.44994	5.90584e-09	5.17941e-06	-1.02936	3.3599e-06	6.2634e-05	37	6	82649352	R								TRUE			NA
cg00806214	0.803368	4.34069e-06	0.000874255	0.935555	2.43287e-08	8.86365e-07	37	16	521912	F	RAB11FIP3	NM_014700	Body					TRUE			TRUE
cg00806481	1.43445	3.09796e-05	0.00378514	1.73828	1.44511e-07	4.10793e-06	37	1	2996650	F	PRDM16;PRDM16	NM_022114;NM_199454	Body;Body	chr1:2997272-2997473	N_Shore			NA			NA
cg00806634	1.05549	2.32642e-05	0.00308829	1.74519	8.32047e-12	1.02387e-09	37	5	11383489	R	CTNND2	NM_001332	Body	chr5:11384681-11385521	N_Shore			NA			NA
cg00806644	-2.66028	2.05736e-06	0.000501125	-1.81187	0.000316076	0.0031891	37	10	126889815	F								TRUE	10:126889702-126890020	Unclassified_Cell_type_specific	TRUE
cg00815325	-1.37176	1.20233e-05	0.00188583	-1.3775	2.65908e-06	5.11164e-05	37	19	5691899	R	LONP1	NM_004793	3'UTR	chr19:5690127-5692213	Island			TRUE			NA
cg00819233	1.20177	8.56244e-05	0.00794674	2.2186	3.04658e-12	4.43717e-10	37	1	162601805	R	DDR2;DDR2	NM_001014796;NM_006182	TSS1500;TSS1500					NA			NA
cg00850073	-0.915722	3.85797e-05	0.00446705	-0.736033	0.00030041	0.00305561	37	5	139016870	F				chr5:139017133-139017668	N_Shore			TRUE			NA
cg00859858	-2.15285	1.33242e-06	0.00036492	-3.67545	6.02924e-15	2.64951e-12	37	1	37944257	R	ZC3H12A	NM_025079	Body	chr1:37939723-37940650	S_Shelf			TRUE	1:37943991-37945931	Promoter_Associated	NA
cg00866632	-1.50584	2.38809e-06	0.000557136	-1.63566	6.69331e-08	2.1184e-06	37	3	52028763	R	RPL29	NM_000992	Body	chr3:52029757-52030058	N_Shore			NA			NA
cg00871133	-1.38206	1.6704e-05	0.00240366	-1.93312	1.09583e-09	6.21187e-08	37	17	37793028	R	STARD3;STARD3;STARD3	NM_006804;NM_001165938;NM_001165937	TSS1500;TSS1500;TSS1500	chr17:37793265-37793722	N_Shore			NA	17:37792752-37794704	Promoter_Associated	NA
cg00879790	-2.31832	1.17216e-05	0.00185093	-2.33151	2.50753e-06	4.85949e-05	37	6	30131283	R	TRIM15;TRIM15	NM_033229;NM_033229	5'UTR;1stExon					TRUE			NA
cg00883689	-2.36124	1.65191e-08	1.15948e-05	-1.36364	0.00018663	0.00203026	37	2	54802904	F	SPTBN1;SPTBN1	NM_178313;NM_003128	Body;Body					TRUE			NA
cg00888336	1.73577	3.72202e-07	0.000138364	1.85105	1.11516e-08	4.52683e-07	37	16	80654763	R	CDYL2	NM_152342	Body					NA			NA
cg00890054	-1.5774	3.31634e-06	0.000714431	-1.65861	2.19817e-07	5.92403e-06	37	1	9405823	R	SPSB1	NM_025106	5'UTR					NA	1:9405642-9405888	Unclassified_Cell_type_specific	NA
cg00890363	-1.49997	7.41665e-05	0.00718418	-1.38102	8.2158e-05	0.00100016	37	4	13540673	R				chr4:13543562-13546494	N_Shelf			NA	4:13540571-13540733	Unclassified_Cell_type_specific	NA
cg00893348	1.85585	5.89953e-06	0.00110209	2.74681	2.71922e-11	2.753e-09	37	3	139353025	F	NMNAT3	NM_178177	5'UTR					NA			NA
cg00899400	-1.62594	7.42774e-05	0.0071915	-2.06299	1.82599e-07	5.03683e-06	37	7	27154537	F	HOXA3;HOXA3;HOXA3	NM_153631;NM_153632;NM_030661	5'UTR;TSS1500;5'UTR	chr7:27154999-27155426	N_Shore			NA			NA
cg00901982	1.427	2.32536e-05	0.00308829	1.82279	2.47705e-08	9.00071e-07	37	2	70257298	R								TRUE			TRUE
cg00905220	1.35446	5.91084e-06	0.00110346	1.20734	1.21133e-05	0.000190764	37	17	982154	F	ABR;ABR;ABR	NM_021962;NM_001092;NM_001159746	Body;Body;Body	chr17:981508-981748	S_Shore			TRUE			NA
cg00907204	-0.823208	4.31326e-05	0.00484091	-0.85397	6.17507e-06	0.000106348	37	7	92461971	R	CDK6;CDK6	NM_001259;NM_001145306	Body;Body	chr7:92462201-92466387	N_Shore			NA	7:92461894-92463431	Promoter_Associated	NA
cg00910893	-1.36414	3.18637e-06	0.000694131	-1.78595	5.33396e-10	3.3594e-08	37	15	78286548	F	LOC91450	NR_026998	Body				DMR	NA			NA
cg00924459	-0.98002	8.34441e-05	0.00781194	-0.926123	6.24724e-05	0.000789626	37	6	133137262	F	RPS12;SNORD100;SNORA33	NM_001016;NR_002435;NR_002436	Body;TSS1500;TSS1500	chr6:133135364-133135829	S_Shore			NA			NA
cg00934624	-1.19678	7.16876e-06	0.00127037	-1.05503	1.76149e-05	0.000264252	37	14	74318234	R	PTGR2;PTGR2;PTGR2	NM_001146155;NM_152444;NM_001146154	TSS1500;TSS1500;TSS1500	chr14:74318412-74318785	N_Shore			NA	14:74318161-74319076	Promoter_Associated	NA
cg00936790	-1.74084	2.82839e-06	0.000635148	-1.88525	8.89991e-08	2.70444e-06	37	8	29027844	F	KIF13B	NM_015254	Body					TRUE	8:29027733-29027911	Unclassified_Cell_type_specific	NA
cg00936935	-3.4376	2.26443e-09	2.44945e-06	-3.26475	1.10084e-09	6.23598e-08	37	10	52271899	F	SGMS1	NM_147156	5'UTR					TRUE			NA
cg00937392	1.52522	0.000117069	0.00996062	1.32768	0.00027617	0.00284337	37	9	94662566	R	ROR2	NM_004560	Body	chr9:94662565-94662818	Island			TRUE			NA
cg00950718	-2.34823	5.80011e-05	0.00600484	-3.32506	7.04929e-09	3.06115e-07	37	1	159859904	R	CCDC19	NM_012337	Body					TRUE	1:159859744-159860014	Unclassified_Cell_type_specific	TRUE
cg00952322	-1.23288	4.03595e-06	0.000828739	-1.56429	1.99138e-09	1.03215e-07	37	22	41763266	R	TEF	NM_001145398	TSS200					TRUE	22:41763076-41763760	Unclassified_Cell_type_specific	NA
cg00956759	1.59911	6.0348e-05	0.00618747	1.82952	1.35552e-06	2.85102e-05	37	17	30023399	F								TRUE			TRUE
cg00957665	-1.91551	1.0707e-13	9.29011e-10	-1.73317	2.80666e-13	6.14698e-11	37	10	104406345	F	TRIM8	NM_030912	Body	chr10:104401821-104404968	S_Shore		RDMR	NA	10:104405335-104406367	Promoter_Associated	NA
cg00968640	-1.87006	1.2806e-05	0.00197096	-3.33254	1.31159e-13	3.27339e-11	37	1	185834094	F	HMCN1	NM_031935	Body					TRUE			NA
cg00971747	-1.71856	1.36989e-05	0.0020783	-1.3967	0.000111756	0.00130485	37	1	200864307	F	C1orf106;C1orf106	NM_001142569;NM_018265	5'UTR;Body	chr1:200860076-200860576	S_Shelf			TRUE			NA
cg00973876	-2.29225	2.52613e-05	0.00328391	-2.82117	7.3025e-08	2.28403e-06	37	17	77899208	F				chr17:77901065-77901333	N_Shore			TRUE			TRUE
cg00976619	-1.71968	6.80685e-06	0.00122609	-2.38138	3.17285e-10	2.18564e-08	37	3	156876725	R	CCNL1	NM_020307	Body	chr3:156877175-156878364	N_Shore		RDMR	NA			NA
cg00980698	-0.855541	1.6062e-05	0.00233768	-0.665965	0.000230019	0.00242913	37	14	21250509	F	RNASE6	NM_005615	3'UTR					NA	14:21250478-21250950	Unclassified_Cell_type_specific	NA
cg00985729	-0.696934	1.49439e-05	0.0022193	-0.686223	4.96875e-06	8.79765e-05	37	6	30712559	F	IER3	NM_003897	TSS1500	chr6:30710307-30712440	S_Shore			NA			TRUE
cg00995152	-1.79353	1.22708e-05	0.00190923	-1.5961	2.47987e-05	0.000355566	37	9	124496315	R	DAB2IP	NM_032552	Body	chr9:124498513-124498962	N_Shelf			NA			NA
cg01003666	-2.80074	2.36188e-12	9.63182e-09	-3.3544	4.99564e-17	5.73872e-14	37	7	139929429	R				chr7:139930065-139930356	N_Shore			NA			NA
cg01005937	1.22014	0.000116413	0.00992431	1.24773	2.55063e-05	0.000364227	37	16	84701635	R								TRUE			NA
cg01015663	-2.58102	3.76296e-11	8.76886e-08	-2.60869	1.70547e-12	2.73818e-10	37	1	23729692	F	TCEA3	NM_003196	Body					TRUE			NA
cg01016122	-1.68734	6.78211e-05	0.00671304	-1.39872	0.000321607	0.00323602	37	6	31082534	F	PSORS1C1	NM_014068	TSS200					TRUE			TRUE
cg01023808	1.35176	2.3384e-05	0.00309895	1.97544	5.2298e-10	3.30554e-08	37	7	97857492	R	TECPR1	NM_015395	Body					NA			NA
cg01038940	-1.6379	1.75446e-05	0.00249905	-2.04376	2.96526e-08	1.04951e-06	37	10	94652135	F	EXOC6;EXOC6	NM_001013848;NM_019053	Body;Body					TRUE			TRUE
cg01049933	-1.41712	7.27262e-05	0.00709492	-1.23285	0.000180835	0.00197523	37	8	1047734	R				chr8:1048559-1048873	N_Shore			NA			NA
cg01054282	-1.8239	4.58161e-10	6.61329e-07	-1.74514	1.67115e-10	1.27527e-08	37	9	2842164	R	KIAA0020	NM_014878	5'UTR	chr9:2843965-2844308	N_Shore			NA			NA
cg01054938	-1.73918	0.000103801	0.00912379	-2.291	1.27949e-07	3.69473e-06	37	17	48712923	R	ABCC3;ABCC3	NM_001144070;NM_003786	Body;Body	chr17:48712050-48712705	S_Shore			TRUE			TRUE
cg01055579	-0.918559	3.58245e-05	0.00422358	-0.921417	9.26692e-06	0.000151321	37	17	33469488	F	NLE1;NLE1	NM_018096;NM_001014445	TSS200;TSS200	chr17:33468896-33469418	S_Shore			NA	17:33468622-33469647	Promoter_Associated	NA
cg01078772	-1.79609	2.18892e-06	0.000525026	-2.1815	2.90021e-09	1.42651e-07	37	20	30920486	F	KIF3B	NM_004798	3'UTR					TRUE			NA
cg01087195	-1.47716	3.58635e-05	0.00422696	-1.8335	1.00428e-07	3.00676e-06	37	13	27843690	F	RASL11A	NM_206827	TSS1500	chr13:27844658-27845525	N_Shore			NA			NA
cg01087239	-3.21053	4.93002e-08	2.81472e-05	-2.94611	6.37821e-08	2.0316e-06	37	19	18385502	F	KIAA1683;KIAA1683;KIAA1683	NM_025249;NM_001145305;NM_001145304	TSS200;TSS200;TSS200					TRUE	19:18385327-18386522	Unclassified	TRUE
cg01089751	-1.01313	5.27295e-06	0.0010124	-0.993435	1.73554e-06	3.52715e-05	37	22	39378425	F	APOBEC3B;APOBEC3B	NM_004900;NM_004900	1stExon;5'UTR					TRUE	22:39378082-39378513	Unclassified	NA
cg01093786	-3.11074	3.75183e-19	1.02967e-13	-2.60513	5.27601e-17	5.94359e-14	37	11	96047698	R	MAML2	NM_032427	Body					TRUE			NA
cg01118348	0.986733	1.10943e-05	0.00177492	1.20993	2.36245e-08	8.64826e-07	37	14	103992856	R				chr14:103995404-103995772	N_Shelf			NA			NA
cg01149239	-1.96092	2.04358e-06	0.000498738	-2.06965	1.12614e-07	3.31724e-06	37	3	196746085	F	MFI2;MFI2	NM_033316;NM_005929	3'UTR;Body					NA			NA
cg01149264	-2.64713	3.55787e-05	0.00420622	-3.55531	1.28948e-08	5.13081e-07	37	16	644081	F	RAB40C	NM_021168	Body	chr16:638545-640705	S_Shelf			NA			NA
cg01152073	-1.32105	3.24887e-11	7.93355e-08	-1.69991	5.3969e-17	6.0298e-14	37	5	179246575	F	SQSTM1;SQSTM1;SQSTM1	NM_001142298;NM_001142299;NM_003900	5'UTR;5'UTR;TSS1500	chr5:179247784-179248711	N_Shore			TRUE			NA
cg01152726	-1.92364	2.59577e-05	0.00335095	-1.37954	0.000879231	0.00758768	37	18	21452844	R	LAMA3;LAMA3;LAMA3;LAMA3	NM_001127718;NM_000227;NM_198129;NM_001127717	TSS200;TSS200;Body;Body					NA			NA
cg01154254	-1.22396	0.000106275	0.0092824	-1.38977	3.41457e-06	6.35108e-05	37	2	71205159	R	ANKRD53;ANKRD53	NM_001115116;NM_024933	TSS1500;TSS1500	chr2:71205563-71206529	N_Shore			TRUE	2:71204917-71206407	Unclassified	TRUE
cg01154353	-1.76619	9.40542e-05	0.00847884	-2.08795	1.26831e-06	2.6898e-05	37	13	44953908	R	SERP2	NM_001010897	Body					TRUE			NA
cg01154355	-1.52397	6.88736e-06	0.00123654	-1.37234	1.16875e-05	0.000184959	37	5	124043109	R	ZNF608	NM_020747	Body				DMR	NA			NA
cg01180628	-2.58418	6.56627e-07	0.000211784	-3.77927	8.38113e-13	1.53199e-10	37	3	5023394	F	BHLHE40	NM_003670	Body	chr3:5024760-5024967	N_Shore		RDMR	NA			NA
cg01181233	-1.71927	1.53828e-05	0.00226632	-1.91607	3.8828e-07	9.68571e-06	37	8	24245289	F	ADAMDEC1;ADAMDEC1;ADAMDEC1	NM_001145271;NM_001145272;NM_014479	5'UTR;5'UTR;Body					NA	8:24244936-24245414	Unclassified_Cell_type_specific	NA
cg01199888	1.2201	4.25421e-05	0.00479515	0.905995	0.000836867	0.00728634	37	2	113672713	F	IL1F7;IL1F7;IL1F7;IL1F7;IL1F7	NM_173204;NM_173205;NM_173203;NM_173202;NM_014439	Body;TSS200;Body;Body;Body					NA			NA
cg01212010	1.56041	1.08752e-08	8.28964e-06	2.22555	2.59618e-15	1.33677e-12	37	10	103484797	F								TRUE			NA
cg01233518	-1.94946	6.56808e-05	0.00656493	-2.51819	9.73225e-08	2.92451e-06	37	21	44837158	F	SIK1	NM_173354	Body	chr21:44836730-44837207	Island			NA	21:44836204-44837896	Gene_Associated_Cell_type_specific	NA
cg01233786	1.36386	8.95486e-07	0.000266791	1.30799	4.23412e-07	1.04344e-05	37	13	113498450	R	ATP11A;ATP11A	NM_015205;NM_032189	Body;Body	chr13:113497296-113497661	S_Shore			NA			NA
cg01235983	-2.20039	3.66575e-09	3.54244e-06	-2.54529	2.53713e-12	3.81649e-10	37	1	32669150	F	CCDC28B	NM_024296	Body	chr1:32670569-32671885	N_Shore			NA			NA
cg01238073	0.566494	5.15107e-06	0.000993674	0.761696	5.03209e-10	3.20692e-08	37	7	50766441	R	GRB10;GRB10;GRB10;GRB10	NM_001001555;NM_001001549;NM_005311;NM_001001550	5'UTR;Body;Body;5'UTR					TRUE			NA
cg01238435	-1.82565	2.29607e-06	0.000540615	-1.41152	5.73778e-05	0.000734268	37	5	141595696	R							DMR	TRUE			TRUE
cg01240599	-1.70569	0.000107498	0.00935716	-2.45294	1.43608e-08	5.63982e-07	37	11	67418045	F	ACY3	NM_080658	5'UTR					NA	11:67417860-67418447	Unclassified	TRUE
cg01244043	-2.09156	1.58229e-05	0.00231527	-2.49788	7.79176e-08	2.41185e-06	37	20	1448437	R	NSFL1C;NSFL1C;NSFL1C	NM_182483;NM_016143;NM_018839	TSS200;TSS200;TSS200	chr20:1446936-1447729	S_Shore			NA	20:1446871-1448660	NonGene_Associated	NA
cg01247856	-1.43663	1.3376e-06	0.000365397	-1.38275	5.9572e-07	1.40062e-05	37	15	59911770	F	GCNT3	NM_004751	3'UTR					NA			NA
cg01250842	0.577159	6.63302e-05	0.00661686	0.480914	0.000295447	0.00301226	37	4	2417681	F	ZFYVE28	NM_020972	Body	chr4:2418310-2420894	N_Shore			NA			NA
cg01260170	0.573611	2.41897e-06	0.000562731	0.742823	4.87259e-10	3.12382e-08	37	1	17020230	F	ESPNP	NR_026567	Body	chr1:17018683-17020959	Island		DMR	TRUE			NA
cg01260603	-1.46204	2.09034e-05	0.002851	-2.84251	1.16833e-14	4.53294e-12	37	6	156203054	R								TRUE			NA
cg01262865	-1.15936	7.0345e-08	3.71112e-05	-0.9032	3.37747e-06	6.29258e-05	37	16	75282094	R	BCAR1;BCAR1;BCAR1;BCAR1;BCAR1;BCAR1;BCAR1;BCAR1;BCAR1	NM_001170718;NM_001170719;NM_001170715;NM_001170720;NM_014567;NM_001170719;NM_001170714;NM_001170716;NM_001170717	Body;5'UTR;Body;Body;Body;1stExon;Body;Body;Body	chr16:75284680-75285821	N_Shelf			NA			NA
cg01266287	1.55408	0.000107982	0.00938526	2.11209	6.33317e-08	2.01931e-06	37	16	66959833	F	RRAD;RRAD	NM_004165;NM_001128850	TSS1500;TSS1500	chr16:66958733-66959655	S_Shore			NA	16:66958594-66959989	Unclassified	TRUE
cg01292856	-2.53578	7.79162e-05	0.00744483	-4.18435	1.21796e-10	9.75622e-09	37	11	65242576	F				chr11:65244636-65245130	N_Shelf			NA	11:65242561-65242712	Unclassified_Cell_type_specific	NA
cg01298102	-2.18662	5.46259e-05	0.00575113	-2.07423	3.79984e-05	0.000515636	37	16	21199840	R								TRUE	16:21199426-21200338	Unclassified	TRUE
cg01309569	1.18214	4.79363e-06	0.000944377	1.20822	6.45273e-07	1.50121e-05	37	1	5950209	F	NPHP4	NM_015102	Body	chr1:5950824-5951029	N_Shore			NA			NA
cg01311222	-2.28594	4.53439e-08	2.63524e-05	-1.66628	8.57639e-06	0.000141449	37	3	124776153	R	HEG1	NM_020733	TSS1500	chr3:124774246-124775113	S_Shore			TRUE			TRUE
cg01319701	-1.77624	1.21763e-05	0.0018996	-2.57522	2.03214e-10	1.4994e-08	37	20	749264	R	C20orf54	NM_033409	TSS200					NA			TRUE
cg01321419	1.14241	1.64872e-05	0.00238339	1.47713	1.03705e-08	4.25722e-07	37	4	186718416	R	SORBS2;SORBS2;SORBS2;SORBS2;SORBS2	NM_003603;NM_021069;NM_001145670;NM_001145671;NM_001145672	5'UTR;5'UTR;5'UTR;5'UTR;5'UTR					NA			NA
cg01324115	-0.603972	2.93453e-05	0.00364963	-0.512814	0.000113398	0.00132092	37	19	42722189	R	DEDD2	NM_133328	TSS1500	chr19:42720826-42722132	S_Shore			NA	19:42721468-42722365	Promoter_Associated	NA
cg01330312	-1.66028	9.359e-05	0.00844787	-2.88314	3.32736e-11	3.25945e-09	37	10	51567670	F	NCOA4;NCOA4;NCOA4	NM_001145261;NM_001145263;NM_001145260	5'UTR;5'UTR;5'UTR	chr10:51565071-51565648	S_Shelf			NA			NA
cg01330316	1.28717	2.15571e-05	0.00291191	1.61682	3.41575e-08	1.18661e-06	37	6	45914282	F	CLIC5;CLIC5	NM_001114086;NM_016929	Body;Body					TRUE	6:45913928-45915077	Unclassified_Cell_type_specific	NA
cg01346501	-1.231	1.57643e-05	0.00230834	-1.39991	2.51993e-07	6.65929e-06	37	17	38254714	R	NR1D1	NM_021724	Body	chr17:38255274-38255896	N_Shore			TRUE			NA
cg01364674	-2.00661	1.64507e-07	7.22916e-05	-2.64752	4.10674e-12	5.72367e-10	37	1	24348512	F								TRUE			NA
cg01367627	-0.663201	0.000116864	0.00995279	-0.730864	6.86043e-06	0.0001166	37	7	98477438	F	TRRAP	NM_003496	5'UTR	chr7:98476004-98476954	S_Shore			NA	7:98477317-98477601	Promoter_Associated	NA
cg01373189	-1.60821	3.14576e-06	0.000686753	-1.78927	5.17705e-08	1.69862e-06	37	13	33002820	R	N4BP2L1;N4BP2L1	NM_052818;NM_001079691	TSS1500;TSS1500	chr13:33001249-33002078	S_Shore			NA			NA
cg01379237	-1.85962	9.9863e-06	0.00163552	-2.2397	3.24547e-08	1.13431e-06	37	3	189983744	R								TRUE			NA
cg01382281	0.889523	6.73026e-05	0.00667755	0.924666	1.00782e-05	0.000162707	37	19	56104340	R	FIZ1	NM_032836	Body	chr19:56103728-56104971	Island			NA	19:56104306-56104456	Unclassified_Cell_type_specific	NA
cg01393234	-1.90901	3.82862e-09	3.6565e-06	-2.12615	1.05937e-11	1.25476e-09	37	1	226085079	F								TRUE	1:226084657-226085339	Unclassified	TRUE
cg01399317	1.75089	5.92342e-06	0.00110402	1.39657	7.47857e-05	0.0009232	37	8	144810339	R	FAM83H	NM_198488	Body	chr8:144808221-144810978	Island			NA	8:144808961-144810594	Unclassified_Cell_type_specific	NA
cg01403010	-0.9375	1.54667e-06	0.000406594	-0.573237	0.000962366	0.00818881	37	22	38609534	F	MAFF;MAFF;MAFF;MAFF	NM_001161573;NM_001161572;NM_012323;NM_001161574	5'UTR;5'UTR;5'UTR;5'UTR	chr22:38610335-38610828	N_Shore			NA	22:38609434-38610109	Unclassified	NA
cg01403803	-1.30458	4.97028e-05	0.00536705	-1.61094	1.867e-07	5.1333e-06	37	5	123987218	R	ZNF608	NM_020747	Body	chr5:123987398-123987748	N_Shore			NA			NA
cg01406381	-2.42291	8.91904e-12	2.7765e-08	-2.13642	5.08336e-11	4.6595e-09	37	19	47288263	F	SLC1A5;SLC1A5;SLC1A5	NM_001145145;NM_005628;NM_001145144	TSS200;Body;5'UTR	chr19:47290585-47291983	N_Shelf			NA	19:47287361-47288340	Promoter_Associated	NA
cg01425762	-3.08993	7.20892e-11	1.48476e-07	-4.38422	1.51467e-18	3.47017e-15	37	16	81666633	F	CMIP;CMIP	NM_030629;NM_198390	Body;Body				DMR	NA	16:81666329-81667241	Promoter_Associated	TRUE
cg01426303	1.36921	5.23351e-06	0.00100577	1.41191	5.87058e-07	1.38408e-05	37	1	227962723	R	SNAP47	NM_053052	Body					NA			TRUE
cg01426475	-1.45248	5.73426e-05	0.0059533	-2.60073	3.53274e-12	5.03377e-10	37	7	22397832	F	RAPGEF5	NM_012294	TSS1500	chr7:22396039-22396852	S_Shore			NA			NA
cg01428095	-2.26376	6.76993e-11	1.40142e-07	-2.14934	3.00663e-11	2.9849e-09	37	1	228134229	R	WNT9A	NM_003395	Body	chr1:228134422-228136282	N_Shore			NA	1:228134091-228134297	Unclassified	NA
cg01430390	-1.93258	1.62898e-05	0.00236015	-2.35714	4.78072e-08	1.58633e-06	37	17	73841288	R	UNC13D	NM_199242	TSS1500					TRUE	17:73841194-73842943	Promoter_Associated	NA
cg01434694	-1.39829	4.39351e-06	0.000880871	-1.30422	3.90241e-06	7.13384e-05	37	16	88837185	F	FAM38A	NM_001142864	Body	chr16:88838112-88838459	N_Shore			TRUE			TRUE
cg01438286	-1.66733	4.52447e-05	0.00501352	-2.7194	5.53275e-11	5.00785e-09	37	1	249200039	R	PGBD2;PGBD2	NM_001017434;NM_170725	TSS1500;TSS1500	chr1:249200252-249200721	N_Shore			NA	1:249199674-249201229	Promoter_Associated	NA
cg01440489	-1.54505	7.449e-06	0.00130655	-1.67362	2.95354e-07	7.64498e-06	37	13	41593385	R	ELF1;ELF1	NM_172373;NM_172373	5'UTR;1stExon					NA	13:41593095-41593670	Promoter_Associated	NA
cg01441698	-1.46894	9.00533e-07	0.000267864	-1.50788	8.52704e-08	2.60527e-06	37	1	20250186	F	PLA2G2E	NM_014589	TSS200					NA			NA
cg01458495	-2.14303	1.61295e-06	0.00041896	-2.50733	5.52954e-09	2.48667e-07	37	3	48310544	F	ZNF589	NM_016089	3'UTR					NA	3:48309554-48310652	Promoter_Associated_Cell_type_specific	NA
cg01466011	-2.24542	7.40849e-06	0.00130225	-2.60888	5.37098e-08	1.75393e-06	37	3	156837590	R				chr3:156837983-156838351	N_Shore			NA			NA
cg01467789	-2.33371	2.1453e-06	0.000517057	-2.53629	5.77618e-08	1.8643e-06	37	8	37595333	R	ERLIN2;ERLIN2;ERLIN2	NM_007175;NM_001003791;NM_001003790	5'UTR;5'UTR;5'UTR	chr8:37593834-37594703	S_Shore	low-CpG:37714452-37714532	RDMR	NA	8:37595044-37595531	Promoter_Associated	TRUE
cg01473837	-1.63049	1.77641e-10	3.06961e-07	-0.942745	1.74884e-05	0.000262567	37	12	54409321	F	HOXC4;HOXC6;HOXC5	NM_014620;NM_153693;NR_003084	TSS1500;TSS1500;TSS1500	chr12:54408426-54408713	S_Shore			NA			NA
cg01484141	-0.964069	1.41827e-05	0.00213422	-0.930537	6.83624e-06	0.000116262	37	17	1624157	R	WDR81;WDR81	NM_001163673;NM_152348	Body;5'UTR	chr17:1627745-1629897	N_Shelf			NA	17:1624080-1624453	Unclassified	NA
cg01484686	-1.53116	3.32008e-08	2.05766e-05	-1.35512	1.06905e-07	3.17503e-06	37	6	106258629	R								TRUE	6:106258409-106258679	Unclassified_Cell_type_specific	NA
cg01487468	-1.65917	0.000109956	0.00950015	-2.94755	2.2232e-11	2.33969e-09	37	6	14622793	R								TRUE			NA
cg01498641	-3.08211	2.0644e-06	0.00050231	-3.35038	5.47666e-08	1.78188e-06	37	16	85365443	F				chr16:85363116-85363360	S_Shelf			NA	16:85364340-85365501	Unclassified	NA
cg01517968	-1.36018	2.40158e-06	0.000559324	-0.842087	0.00106251	0.00889962	37	12	52348879	F	ACVR1B;ACVR1B;ACVR1B	NM_004302;NM_020327;NM_020328	Body;Body;Body	chr12:52345531-52345903	S_Shelf			NA			NA
cg01534887	0.564016	2.62512e-05	0.00337737	0.664009	2.26154e-07	6.06713e-06	37	10	75683646	F	C10orf55	NM_001001791	TSS1500					TRUE			NA
cg01538165	-2.59837	2.9818e-06	0.000659431	-3.34743	7.91216e-10	4.70146e-08	37	8	71240128	R	NCOA2	NM_006540	5'UTR					TRUE			NA
cg01538731	1.03353	0.00010364	0.0091184	1.11017	9.42588e-06	0.000153529	37	16	87757018	F	KLHDC4	NM_017566	Body	chr16:87754008-87754285	S_Shelf			TRUE			TRUE
cg01540203	-1.62276	7.58413e-05	0.00729959	-1.26263	0.000753802	0.00666949	37	17	80662407	F								NA			NA
cg01541846	-2.16807	8.01803e-07	0.000245479	-2.32479	2.43581e-08	8.87222e-07	37	19	16272242	R	CIB3	NM_054113	3'UTR					TRUE			NA
cg01561259	0.986738	1.54519e-06	0.000406539	0.689541	0.000187609	0.00203923	37	17	78560781	F	RPTOR;RPTOR	NM_001163034;NM_020761	Body;Body					NA			NA
cg01561719	-2.0447	7.86776e-05	0.0074963	-2.51128	4.2389e-07	1.04418e-05	37	10	90611855	R	ANKRD22	NM_144590	TSS200					NA			NA
cg01563502	0.536422	0.000109214	0.00946007	0.491151	0.000130376	0.00148808	37	7	100285047	F	GIGYF1	NM_022574	Body	chr7:100284888-100285155	Island			NA			NA
cg01570480	1.43657	1.81241e-06	0.000458029	1.78974	1.03561e-09	5.9174e-08	37	11	64951916	F	CAPN1	NM_005186	Body	chr11:64951724-64952035	Island			TRUE			NA
cg01574231	-1.87994	9.36056e-11	1.81667e-07	-1.8992	4.71712e-12	6.39941e-10	37	17	73840922	F	UNC13D	NM_199242	TSS200					TRUE			NA
cg01574287	0.520349	2.84894e-05	0.0035803	0.635126	1.07222e-07	3.18353e-06	37	1	204166746	F	KISS1	NM_002256	TSS1500					NA			NA
cg01576275	-1.48126	2.98707e-05	0.00369805	-1.68584	5.84393e-07	1.37852e-05	37	22	43409880	F				chr22:43410421-43411510	N_Shore			NA			NA
cg01577187	-0.995588	8.39196e-05	0.00784565	-1.04999	1.01242e-05	0.000163318	37	2	106362832	F	NCK2;NCK2	NM_003581;NM_001004722	5'UTR;5'UTR	chr2:106361032-106362218	S_Shore			NA	2:106362631-106363105	Promoter_Associated	NA
cg01582066	-2.86099	1.45042e-11	4.10756e-08	-3.08304	4.70306e-14	1.40921e-11	37	22	32057065	R				chr22:32057922-32058323	N_Shore		RDMR	NA			NA
cg01590787	-1.02834	2.34162e-06	0.000548806	-1.20992	7.88066e-09	3.36802e-07	37	5	175813861	R	NOP16	NM_016391	Body	chr5:175815288-175815847	N_Shore			NA			NA
cg01606773	-2.22749	2.07047e-06	0.000502919	-1.50837	0.000341462	0.00340622	37	6	74414015	F	CD109;CD109;CD109	NM_001159587;NM_001159588;NM_133493	Body;Body;Body					TRUE			TRUE
cg01607849	-1.75222	2.83347e-05	0.00356966	-2.71859	1.11262e-10	9.03125e-09	37	12	6976129	R	TPI1;TPI1;TPI1	NM_001159287;NR_027483;NM_000365	TSS1500;TSS1500;TSS1500	chr12:6976392-6977393	N_Shore			NA	12:6976069-6977854	Promoter_Associated	NA
cg01610979	-2.61456	3.00756e-06	0.000663689	-2.74218	2.07741e-07	5.63572e-06	37	4	8193310	F							DMR	NA			TRUE
cg01611626	-1.2092	4.19436e-06	0.000853958	-0.898274	0.000160635	0.00178087	37	16	2565338	R	ATP6V0C	NM_001694	Body	chr16:2563430-2564903	S_Shore		RDMR	NA			NA
cg01612883	1.45806	3.2722e-08	2.04351e-05	0.788375	0.000595354	0.00546167	37	12	125023115	F				chr12:125023589-125023809	N_Shore			TRUE	12:125023099-125023495	Unclassified_Cell_type_specific	NA
cg01614597	-0.673852	5.93031e-06	0.00110429	-0.635317	4.29789e-06	7.75256e-05	37	19	14185403	R	LOC113230	NR_024282	Body	chr19:14185107-14185601	Island			NA			TRUE
cg01617071	-2.8353	3.43286e-06	0.000733574	-3.94944	8.18467e-11	6.96524e-09	37	7	964629	R	ADAP1	NM_006869	Body	chr7:965987-966266	N_Shore			NA	7:964228-964768	Unclassified	TRUE
cg01620309	-0.605268	0.000108762	0.00942891	-0.604373	3.49111e-05	0.000478663	37	17	42856469	R	ADAM11	NM_002390	Body	chr17:42856596-42856847	N_Shore			NA	17:42856123-42857253	Unclassified	NA
cg01620569	-0.97376	6.9488e-05	0.00684976	-1.04437	5.88757e-06	0.00010203	37	1	33502810	R	AK2;AK2	NM_001625;NM_013411	TSS1500;TSS1500	chr1:33502201-33502719	S_Shore			NA	1:33501604-33503030	Promoter_Associated	NA
cg01624637	1.6975	4.78347e-05	0.0052242	2.92223	9.61218e-12	1.15597e-09	37	16	87739377	R	LOC100129637	NR_024488	TSS200	chr16:87738617-87738851	S_Shore			NA			NA
cg01631333	-1.85279	4.91554e-06	0.000961427	-2.0338	1.27877e-07	3.69351e-06	37	13	110747452	R								TRUE			TRUE
cg01636910	-2.53736	6.06073e-08	3.29985e-05	-2.81714	3.65592e-10	2.46226e-08	37	1	85740751	F	BCL10	NM_003921	Body	chr1:85741865-85742535	N_Shore			NA			NA
cg01645729	-1.88945	9.07269e-10	1.14903e-06	-2.41278	7.55073e-15	3.18101e-12	37	2	131582240	R								TRUE	2:131581827-131582479	Unclassified_Cell_type_specific	TRUE
cg01647204	-2.08486	2.2382e-09	2.42752e-06	-2.00529	7.38852e-10	4.43098e-08	37	14	100883459	R	WDR25;WDR25	NM_024515;NM_001161476	Body;Body					TRUE	14:100883131-100884628	Promoter_Associated_Cell_type_specific	TRUE
cg01649611	-3.41291	1.35477e-11	3.8635e-08	-2.24617	2.81582e-07	7.33089e-06	37	2	43521066	R	THADA;THADA	NM_022065;NM_001083953	Body;Body					TRUE			TRUE
cg01657995	-2.07296	1.22929e-06	0.000342191	-2.85507	2.16038e-11	2.28419e-09	37	6	31804883	F	C6orf48;C6orf48;SNORD52	NM_001040437;NM_001040438;NR_002742	5'UTR;5'UTR;Body	chr6:31802598-31802823	S_Shelf			NA			NA
cg01668099	-2.25995	5.71915e-10	7.77431e-07	-1.42046	7.61359e-06	0.000127694	37	11	130026798	F				chr11:130029658-130030262	N_Shelf			TRUE			TRUE
cg01668352	-2.91174	5.31924e-06	0.00101793	-4.54605	3.33603e-12	4.79219e-10	37	12	64482597	R	SRGAP1	NM_020762	Body					TRUE			TRUE
cg01673284	-1.7037	1.24806e-05	0.00193375	-2.11122	2.12847e-08	7.9067e-07	37	16	4527211	R	HMOX2;HMOX2;HMOX2	NM_002134;NM_001127206;NM_001127204	5'UTR;5'UTR;5'UTR	chr16:4526295-4526927	S_Shore			NA	16:4525913-4527244	Promoter_Associated	NA
cg01691090	-1.11491	1.05958e-06	0.00030451	-1.09189	3.14075e-07	8.05693e-06	37	11	2951265	F	PHLDA2	NM_003311	TSS1500	chr11:2949788-2951756	Island			NA			NA
cg01692279	-1.91465	3.68176e-06	0.000772742	-2.04756	1.67138e-07	4.66495e-06	37	7	2569952	F				chr7:2571237-2571511	N_Shore			TRUE	7:2569923-2570324	Unclassified	NA
cg01695279	-1.64157	5.92872e-05	0.00610544	-2.58545	3.06594e-10	2.12456e-08	37	15	83733816	R	BTBD1;BTBD1	NM_025238;NM_001011885	Body;Body	chr15:83735240-83736089	N_Shore			TRUE	15:83733664-83733849	Promoter_Associated_Cell_type_specific	NA
cg01695994	-2.39708	3.94587e-08	2.35254e-05	-1.74533	7.92742e-06	0.000132265	37	17	80246403	R				chr17:80250226-80251057	N_Shelf			TRUE			TRUE
cg01706334	0.616922	4.03055e-06	0.000828047	0.714417	2.54909e-08	9.22059e-07	37	8	72872845	F								TRUE			NA
cg01713406	1.64279	1.29843e-05	0.00199363	1.31603	0.00013142	0.00149874	37	2	168901243	F	STK39	NM_013233	Body					TRUE			NA
cg01715680	-2.80498	3.34524e-08	2.07011e-05	-2.84833	2.71527e-09	1.34544e-07	37	14	93725377	R	BTBD7	NM_001002860	Body					TRUE			NA
cg01720920	0.998869	1.68594e-06	0.000432682	1.11226	2.27229e-08	8.36327e-07	37	14	104185151	F	ZFYVE21	NM_024071	Body	chr14:104181378-104182952	S_Shelf			NA			NA
cg01731783	-2.18681	5.71087e-09	5.04095e-06	-1.92615	2.31346e-08	8.4918e-07	37	14	74211788	R	C14orf43;C14orf43	NM_001043318;NM_194278	5'UTR;5'UTR					TRUE			NA
cg01741999	-1.32147	1.14428e-05	0.00181573	-1.03066	0.000172799	0.00189793	37	2	219137824	R	PNKD	NM_015488	Body	chr2:219134787-219135393	S_Shelf			NA			NA
cg01751245	-2.34038	4.40858e-10	6.41735e-07	-1.62135	9.25073e-07	2.04593e-05	37	2	65593761	F	SPRED2;SPRED2;SPRED2	NM_001128210;NM_001128210;NM_181784	5'UTR;1stExon;Body					TRUE			TRUE
cg01753788	-1.60679	0.000116423	0.00992431	-1.78617	5.80078e-06	0.00010071	37	8	145024929	R	PLEC1;PLEC1;PLEC1;PLEC1;PLEC1	NM_201380;NM_000445;NM_201380;NM_201378;NM_201379	5'UTR;Body;1stExon;Body;Body	chr8:145024449-145025179	Island			NA			NA
cg01767053	-2.67503	4.76255e-05	0.00520693	-2.86235	3.85017e-06	7.0491e-05	37	16	85678884	R	KIAA0182;KIAA0182	NM_001134473;NM_014615	5'UTR;Body	chr16:85674843-85675192	S_Shelf			NA	16:85678767-85678901	Unclassified_Cell_type_specific	NA
cg01772439	-2.89724	6.95078e-07	0.00022145	-4.15218	1.98412e-12	3.11205e-10	37	5	149012102	R	FLJ41603	NM_001001669	3'UTR					TRUE			TRUE
cg01777586	-1.90768	1.69195e-07	7.39235e-05	-1.57305	2.22709e-06	4.37778e-05	37	17	80163174	R	CCDC57	NM_198082	5'UTR					TRUE	17:80163100-80164368	Promoter_Associated	TRUE
cg01778926	-1.27258	3.03528e-06	0.00066872	-1.45165	2.58958e-08	9.34797e-07	37	12	49371182	R	WNT1	NM_005430	TSS1500	chr12:49371690-49375550	N_Shore		CDMR	NA	12:49370127-49372095	Unclassified	NA
cg01782059	1.7948	5.77221e-07	0.000191845	2.92591	8.26212e-15	3.4137e-12	37	1	44715942	F	ERI3	NM_024066	Body					NA			NA
cg01784507	-1.16924	1.14873e-05	0.00182208	-1.43848	2.27856e-08	8.38255e-07	37	1	227016024	F						low-CpG:225082489-225082854		NA	1:227015301-227016297	Promoter_Associated	NA
cg01795894	-2.00161	8.58637e-06	0.00146081	-1.4717	0.000305936	0.00310291	37	21	43107725	F	NCRNA00111	NR_024367	Body	chr21:43109349-43109687	N_Shore			NA			NA
cg01798157	-1.27851	3.95506e-05	0.00455618	-1.1346	7.76822e-05	0.000953415	37	1	203276595	F	BTG2	NM_006763	3'UTR	chr1:203274305-203275338	S_Shore			NA	1:203276430-203276637	Promoter_Associated	NA
cg01802545	-1.25321	1.27521e-05	0.00196389	-1.17072	1.1123e-05	0.00017716	37	14	93196432	F	LGMN;LGMN	NM_001008530;NM_005606	Body;Body					NA	14:93196413-93196441	Unclassified_Cell_type_specific	TRUE
cg01804036	1.31535	1.54223e-05	0.00227049	1.02365	0.000223651	0.00237182	37	12	117483310	F	TESC;TESC;TESC	NR_031766;NM_017899;NM_001168325	Body;Body;Body	chr12:117484305-117484627	N_Shore			TRUE	12:117483269-117483441	Unclassified_Cell_type_specific	NA
cg01808708	-2.42422	4.18662e-05	0.00473335	-3.26913	1.52158e-08	5.92376e-07	37	1	183484105	F	SMG7;SMG7;SMG7	NM_201569;NM_201568;NM_173156	5'UTR;Body;Body					TRUE			NA
cg01812571	-2.39684	2.02994e-08	1.3797e-05	-2.15128	4.71569e-08	1.56819e-06	37	12	132970724	R				chr12:132972695-132972941	N_Shore			NA			TRUE
cg01826354	-2.22597	2.13629e-06	0.00051519	-1.46033	0.000513982	0.00482258	37	17	81006497	R	B3GNTL1	NM_001009905	Body	chr17:81009245-81009999	N_Shelf	low-CpG:78599707-78599823		NA	17:81006161-81006824	Promoter_Associated_Cell_type_specific	TRUE
cg01838863	1.16931	0.000100703	0.00892573	0.91673	0.000859227	0.00744574	37	16	87736832	R	LOC100129637	NR_024488	Body	chr16:87736652-87736907	Island			NA			NA
cg01839993	-1.52098	1.55295e-05	0.00228298	-2.46104	7.74299e-12	9.6416e-10	37	10	74034644	R	DDIT4	NM_019058	Body	chr10:74033167-74034698	Island			NA	10:74034192-74035368	Promoter_Associated	NA
cg01845036	-1.63763	1.63936e-06	0.000424584	-1.18941	0.000113882	0.00132554	37	5	141852077	R								TRUE	5:141851989-141852196	Unclassified_Cell_type_specific	TRUE
cg01854491	-1.63035	8.78205e-06	0.00148358	-2.00199	1.61062e-08	6.2228e-07	37	8	144815021	F	FAM83H	NM_198488	5'UTR	chr8:144815203-144816518	N_Shore			NA	8:144814935-144815164	Unclassified_Cell_type_specific	NA
cg01862311	-2.5275	7.9504e-08	4.05276e-05	-2.13392	7.05148e-07	1.61934e-05	37	8	26308815	R				chr8:26305853-26306825	S_Shore			NA			TRUE
cg01868729	-2.11463	2.43742e-05	0.00320745	-3.66915	1.57303e-12	2.56185e-10	37	12	83251284	F	TMTC2	NM_152588	Body					TRUE			NA
cg01870681	-0.965127	8.00388e-08	4.06477e-05	-0.765871	2.5965e-06	5.00738e-05	37	6	29933925	R								TRUE	6:29933815-29934049	Unclassified_Cell_type_specific	NA
cg01882871	-1.93009	2.67513e-05	0.00342628	-4.77839	3.0405e-19	9.46511e-16	37	17	32575548	R								TRUE			NA
cg01904393	-1.4288	4.00006e-05	0.00459117	-1.94327	1.11652e-08	4.53145e-07	37	12	51815083	F				chr12:51818460-51819166	N_Shelf			NA	12:51814494-51816088	Unclassified	TRUE
cg01908444	-1.08118	7.06486e-06	0.00125801	-1.54183	1.31286e-10	1.03892e-08	37	2	70007607	F	ANXA4	NM_001153	5'UTR					TRUE			NA
cg01909856	-1.85289	1.1622e-05	0.00183916	-1.31442	0.000583809	0.00537256	37	9	139438290	F	NOTCH1	NM_017617	Body	chr9:139439041-139441532	N_Shore			NA			NA
cg01910639	-2.81789	9.49939e-06	0.00157732	-3.77655	1.51928e-09	8.19212e-08	37	1	153507779	R	S100A6	NM_014624	Body	chr1:153508424-153508840	N_Shore			NA	1:153507457-153509370	Promoter_Associated	TRUE
cg01930441	-0.937499	8.86056e-05	0.00813356	-1.40342	3.22e-09	1.56121e-07	37	16	21289268	F	CRYM;CRYM	NM_001014444;NM_001888	Body;Body	chr16:21289419-21289819	N_Shore			TRUE			NA
cg01930478	-1.68243	3.42099e-07	0.000130261	-1.61238	1.57102e-07	4.41961e-06	37	1	3373794	F	ARHGEF16	NM_014448	5'UTR	chr1:3370905-3371683	S_Shelf			NA			NA
cg01937809	-2.01923	7.59216e-07	0.000236525	-2.70511	2.58784e-11	2.64428e-09	37	1	37941854	R	ZC3H12A	NM_025079	Body	chr1:37939723-37940650	S_Shore			NA	1:37941673-37942038	Promoter_Associated	NA
cg01941585	1.50936	3.51605e-06	0.000746802	2.07695	1.27547e-10	1.01274e-08	37	12	66240388	F	HMGA2;HMGA2	NM_003484;NM_003483	Body;Body					TRUE			NA
cg01950680	1.36996	3.79392e-09	3.64261e-06	1.32506	1.08385e-09	6.15423e-08	37	8	17778275	R				chr8:17780032-17781272	N_Shore			NA			NA
cg01955533	-1.696	3.78584e-05	0.00440354	-2.91726	5.8335e-12	7.60769e-10	37	6	36650733	R	CDKN1A;CDKN1A	NM_000389;NM_078467	5'UTR;5'UTR	chr6:36651874-36652135	N_Shore			NA	6:36650465-36650920	Unclassified	NA
cg01958295	-2.11618	9.20169e-05	0.00834813	-3.04593	1.04802e-08	4.29493e-07	37	2	36598278	R	CRIM1	NM_016441	Body					TRUE			NA
cg01970325	-1.80861	1.12406e-05	0.001792	-2.30208	8.77116e-09	3.69135e-07	37	9	140354241	F	NELF;NELF;NELF;NELF	NM_001130970;NM_001130969;NM_001130971;NM_015537	TSS1500;TSS1500;TSS1500;TSS1500	chr9:140352818-140354044	S_Shore			NA			NA
cg01972009	-1.9034	4.29389e-06	0.000868728	-2.04125	1.88742e-07	5.18056e-06	37	11	67273431	F	PITPNM1;PITPNM1	NM_004910;NM_001130848	TSS1500;TSS1500	chr11:67275067-67276431	N_Shore			NA			NA
cg01976921	1.12269	5.83034e-05	0.00602849	1.04657	5.34948e-05	0.000690907	37	8	38342087	R								TRUE			NA
cg01981354	-1.24208	6.03584e-05	0.00618747	-1.57983	1.24004e-07	3.5972e-06	37	8	42748651	R	RNF170;RNF170;RNF170;RNF170;RNF170;RNF170	NM_001160223;NR_027668;NM_001160224;NM_030954;NM_001160225;NR_027669	5'UTR;Body;5'UTR;5'UTR;5'UTR;Body	chr8:42751212-42753132	N_Shelf		RDMR	NA	8:42748352-42749026	Unclassified_Cell_type_specific	NA
cg02004044	-2.9059	3.17342e-11	7.84324e-08	-2.47658	4.98873e-10	3.18625e-08	37	17	79107140	F	MIR1250;AATK	NR_031652;NM_001080395	TSS200;Body	chr17:79109698-79109911	N_Shelf			NA			NA
cg02010752	-0.849708	8.3732e-05	0.00783351	-0.878581	1.43536e-05	0.000221127	37	8	145017520	R	PLEC1;PLEC1;PLEC1;PLEC1;PLEC1;PLEC1;PLEC1	NM_201381;NM_201382;NM_000445;NM_201378;NM_201379;NM_201383;NM_201380	Body;Body;Body;Body;Body;TSS1500;Body	chr8:145017868-145018444	N_Shore			NA			NA
cg02013841	-2.47097	2.14395e-07	8.96731e-05	-3.4652	6.34661e-13	1.22047e-10	37	13	49159767	F								TRUE			NA
cg02023138	-2.4852	4.64226e-05	0.00510164	-3.27798	3.25393e-08	1.13707e-06	37	12	51701979	R	BIN2	NM_016293	Body					TRUE			TRUE
cg02026049	1.06204	2.30904e-06	0.000543042	1.00009	1.67654e-06	3.42381e-05	37	17	79049229	R	BAIAP2;BAIAP2;BAIAP2;BAIAP2	NM_017450;NM_006340;NM_001144888;NM_017451	Body;Body;Body;Body	chr17:79051892-79052534	N_Shelf			NA			TRUE
cg02030275	1.60376	3.99646e-08	2.37576e-05	1.18735	5.86488e-06	0.000101672	37	20	31169126	R				chr20:31170740-31173640	N_Shore			NA	20:31168639-31169163	Unclassified	NA
cg02033694	-0.80542	3.08958e-05	0.00378021	-0.687406	0.000110121	0.00128797	37	16	29296797	R				chr16:29296481-29296721	S_Shore			NA			TRUE
cg02037425	-1.89273	7.36282e-07	0.000231503	-2.04071	1.89722e-08	7.15788e-07	37	14	42662538	F								TRUE			NA
cg02045355	-1.86087	7.5837e-07	0.000236442	-2.00365	2.0394e-08	7.62794e-07	37	6	26365194	R	BTN3A2	NM_007047	TSS1500					TRUE	6:26364437-26365651	Promoter_Associated_Cell_type_specific	TRUE
cg02047803	-2.21089	4.6374e-09	4.25934e-06	-3.33311	5.33374e-17	5.9756e-14	37	5	141018369	F	RELL2;RELL2	NM_001130029;NM_173828	Body;Body	chr5:141016320-141017685	S_Shore			NA	5:141018305-141018651	Promoter_Associated_Cell_type_specific	NA
cg02054358	-0.650321	3.55156e-05	0.00420296	-0.627961	1.79978e-05	0.000269233	37	17	70335431	R								TRUE			TRUE
cg02054513	-3.02758	2.54461e-06	0.000583962	-2.94938	9.07514e-07	2.01376e-05	37	16	80319282	R								TRUE			NA
cg02074930	1.21746	3.31643e-09	3.28077e-06	0.967473	1.89413e-07	5.19667e-06	37	14	75423089	R	PGF	NM_002632	TSS1500	chr14:75422068-75422507	S_Shore			NA			NA
cg02075410	2.19299	0.000117662	0.00999349	3.30671	4.58298e-09	2.11678e-07	37	4	151504138	F	LRBA;MAB21L2;MAB21L2	NM_006726;NM_006439;NM_006439	Body;1stExon;5'UTR	chr4:151504011-151505085	Island		RDMR	TRUE			NA
cg02079584	-2.14663	4.17794e-05	0.00472485	-2.97568	7.1086e-09	3.08362e-07	37	15	74528719	F	CCDC33;CCDC33	NM_025055;NM_025055	1stExon;5'UTR					NA			NA
cg02084467	-1.86594	6.52028e-07	0.00021094	-1.527	8.03886e-06	0.000133862	37	17	632478	R				chr17:635203-636499	N_Shelf			NA			NA
cg02085805	-0.861878	9.33611e-06	0.00155654	-0.710035	6.65673e-05	0.000834298	37	1	110527112	F	AHCYL1	NM_006621	TSS200	chr1:110527248-110528026	N_Shore			NA	1:110526486-110527512	Promoter_Associated	NA
cg02088785	-2.85628	8.03335e-08	4.06767e-05	-3.15674	5.99967e-10	3.71498e-08	37	13	99223336	R	STK24	NM_001032296	Body				DMR	TRUE	13:99223254-99223800	Unclassified	NA
cg02091781	-2.5901	7.28055e-07	0.00022998	-2.78313	2.0489e-08	7.65729e-07	37	14	94808883	R								TRUE			TRUE
cg02092181	-1.92451	6.7777e-06	0.001223	-1.61903	3.65185e-05	0.000498123	37	19	2162766	R	DOT1L	NM_032482	TSS1500	chr19:2163632-2165603	N_Shore			NA			NA
cg02092885	-1.2904	4.8112e-05	0.00524227	-1.55903	2.96288e-07	7.66574e-06	37	17	29379458	R								TRUE			TRUE
cg02101833	-2.21619	4.97318e-06	0.000967596	-3.19817	4.74817e-11	4.40474e-09	37	2	10471388	R	HPCAL1;HPCAL1	NM_002149;NM_134421	5'UTR;5'UTR					NA	2:10471156-10472538	Promoter_Associated_Cell_type_specific	NA
cg02112681	1.52475	8.40259e-07	0.000254863	1.39191	1.16757e-06	2.50107e-05	37	7	1120141	R	C7orf50;C7orf50;C7orf50	NM_001134395;NM_032350;NM_001134396	Body;Body;Body	chr7:1119980-1120248	Island			NA			NA
cg02123534	-4.06349	6.1801e-12	2.10251e-08	-4.56944	2.83042e-15	1.42501e-12	37	7	965485	R	ADAP1	NM_006869	Body	chr7:965987-966266	N_Shore			NA	7:965264-965502	Unclassified_Cell_type_specific	NA
cg02130107	-1.16618	3.73296e-07	0.000138518	-1.12308	1.53227e-07	4.32421e-06	37	16	29828598	R	C16orf53	NM_024516	Body	chr16:29826662-29828302	S_Shore			NA	16:29826859-29828805	Promoter_Associated	NA
cg02131853	-3.14161	2.16965e-10	3.64112e-07	-3.83919	7.02367e-15	3.00239e-12	37	4	39034637	F	TMEM156	NM_024943	TSS1500					NA			NA
cg02134347	0.902426	3.83346e-06	0.000795573	0.982025	1.1546e-07	3.38863e-06	37	14	68970795	R	RAD51L1	NM_133509	Body					TRUE			NA
cg02134976	-1.39354	3.17998e-06	0.000693481	-1.6388	1.21909e-08	4.88838e-07	37	6	42110740	F	C6orf132	NM_001164446	TSS200	chr6:42109904-42110361	S_Shore			NA	6:42109893-42110884	Unclassified_Cell_type_specific	TRUE
cg02137970	0.751264	1.62869e-05	0.00236015	0.864375	2.00294e-07	5.45592e-06	37	6	3929452	F								TRUE			TRUE
cg02144954	-1.54894	2.92777e-05	0.00364678	-1.31529	0.00011301	0.00131693	37	17	72439205	R	GPRC5C;GPRC5C	NM_018653;NM_022036	Body;Body	chr17:72442927-72443194	N_Shelf			NA			TRUE
cg02149376	-2.29332	7.90609e-05	0.00752424	-3.22594	1.48251e-08	5.79372e-07	37	4	119270205	R	PRSS12	NM_003619	Body	chr4:119273305-119274458	N_Shelf			NA			NA
cg02192117	-1.41039	3.75456e-05	0.00437465	-1.22566	0.000100915	0.00119528	37	7	5458719	R	TNRC18	NM_001080495	Body	chr7:5458503-5469256	Island			TRUE	7:5458379-5459110	NonGene_Associated_Cell_type_specific	TRUE
cg02198988	-1.31272	7.79823e-07	0.000240234	-0.91265	0.000128893	0.0014736	37	5	134661102	F				chr5:134662721-134663027	N_Shore			NA	5:134660571-134661507	Unclassified_Cell_type_specific	NA
cg02204618	-1.13455	6.90904e-06	0.00123714	-1.72327	1.48072e-11	1.66462e-09	37	2	36842633	R								TRUE			NA
cg02210967	-1.5105	2.08492e-06	0.000505193	-1.60162	1.0307e-07	3.07478e-06	37	7	5572794	F				chr7:5569062-5570594	S_Shelf			NA	7:5572271-5573064	Promoter_Associated	NA
cg02218324	1.57667	0.00010068	0.00892561	2.14292	5.59783e-08	1.81507e-06	37	19	46318439	R	RSPH6A;RSPH6A	NM_030785;NM_030785	1stExon;5'UTR	chr19:46318490-46319266	N_Shore			NA			NA
cg02218884	1.37515	1.48593e-05	0.00220834	1.72332	2.05556e-08	7.67713e-07	37	11	627582	R	SCT	NM_021920	TSS1500	chr11:626728-628037	Island			NA	11:626473-627651	Unclassified_Cell_type_specific	NA
cg02225720	-2.56152	3.32519e-09	3.28077e-06	-3.7029	2.1772e-16	1.85063e-13	37	17	3623472	R	ITGAE	NM_002208	Body	chr17:3626924-3627839	N_Shelf			NA			NA
cg02239453	-1.53236	1.60092e-05	0.00233332	-2.12006	1.41422e-09	7.70403e-08	37	11	33797523	R	FBXO3;FBXO3	NM_012175;NM_033406	TSS1500;TSS1500	chr11:33795392-33796319	S_Shore			NA			NA
cg02255511	-1.81995	0.000105227	0.00921452	-2.30727	3.22951e-07	8.25555e-06	37	3	100328265	R	GPR128	NM_032787	TSS200					NA			NA
cg02257708	-1.68603	1.48445e-06	0.000395146	-3.07475	4.15366e-16	3.06307e-13	37	7	98989843	R	ARPC1B	NM_005720	Body	chr7:98990157-98990922	N_Shore			NA	7:98989705-98989952	Gene_Associated_Cell_type_specific	NA
cg02259081	-1.20873	0.000109442	0.00947577	-0.969547	0.000707958	0.00632424	37	12	53268433	R				chr12:53267859-53268290	S_Shore			NA	12:53267215-53268678	Promoter_Associated_Cell_type_specific	NA
cg02260710	0.717832	3.82483e-05	0.00443498	0.941199	2.76503e-08	9.88595e-07	37	16	85730584	F								NA			NA
cg02272851	-2.54152	6.68666e-06	0.00121021	-3.87178	1.25342e-11	1.44966e-09	37	10	3797471	R								TRUE	10:3797425-3797572	Unclassified_Cell_type_specific	TRUE
cg02285155	-1.72494	4.26356e-05	0.00480096	-1.68728	1.75378e-05	0.000263212	37	10	21653473	R								TRUE			TRUE
cg02291020	-1.61705	3.831e-07	0.000141287	-1.43299	1.03373e-06	2.24831e-05	37	10	81963408	F	ANXA11;ANXA11;ANXA11	NM_145868;NM_145869;NM_001157	5'UTR;5'UTR;5'UTR	chr10:81964681-81965558	N_Shore			NA	10:81963214-81963545	Promoter_Associated	TRUE
cg02291164	-2.00885	2.35676e-07	9.66897e-05	-1.74441	1.01685e-06	2.21847e-05	37	14	59296302	R								NA			NA
cg02301528	-1.64888	4.57481e-05	0.00504905	-2.06615	1.15643e-07	3.39302e-06	37	12	12939519	R	APOLD1;APOLD1	NM_001130415;NM_030817	Body;Body	chr12:12939713-12940391	N_Shore			TRUE	12:12939380-12942411	Promoter_Associated	NA
cg02302043	1.17928	1.02771e-06	0.000296815	1.0546	2.17249e-06	4.28638e-05	37	19	4988178	R	KDM4B	NM_015015	5'UTR	chr19:4986182-4986405	S_Shore			TRUE			NA
cg02304580	1.05681	1.93187e-10	3.26898e-07	0.867239	7.56011e-09	3.25044e-07	37	5	139124312	F				chr5:139125902-139127711	N_Shore			NA			NA
cg02313829	1.43681	2.09081e-08	1.40932e-05	1.34344	1.66209e-08	6.3932e-07	37	11	75136574	F	KLHL35	NM_001039548	Body	chr11:75136407-75136689	Island			NA			NA
cg02316445	-2.73984	6.22831e-07	0.00020401	-3.23702	1.13028e-09	6.37971e-08	37	16	80231787	R								TRUE			NA
cg02322400	-2.00926	3.56571e-05	0.00420994	-2.27093	8.62889e-07	1.92658e-05	37	11	95980186	F	MAML2	NM_032427	Body					TRUE			NA
cg02331198	1.18323	1.18429e-05	0.00186542	0.931225	0.000156643	0.00174292	37	6	106988121	F	AIM1	NM_001624	Body					TRUE			NA
cg02332117	-1.36196	1.0945e-05	0.00175517	-1.31252	5.3499e-06	9.37805e-05	37	1	153539404	R	S100A2	NM_005978	TSS1500					TRUE	1:153538913-153539478	Unclassified	NA
cg02334660	-2.93659	1.72513e-06	0.000440523	-4.37096	2.38231e-12	3.6237e-10	37	4	75312483	F	AREG	NM_001657	Body	chr4:75310686-75311140	S_Shore			NA			NA
cg02335657	-0.646558	5.03401e-05	0.00541795	-0.979286	7.47694e-10	4.47283e-08	37	3	129116059	F	RPL32P3;SNORA7B	NR_003111;NR_002992	Body;Body					NA			NA
cg02338222	-1.051	2.02196e-06	0.000496127	-1.19945	1.49127e-08	5.82294e-07	37	9	132245400	R				chr9:132244401-132245732	Island			NA	9:132243901-132246022	Unclassified	NA
cg02345399	-2.22321	3.25584e-05	0.00392622	-3.43148	1.73915e-10	1.31827e-08	37	11	65195039	F				chr11:65190824-65191058	S_Shelf	low-CpG:64951457-64951665		NA	11:65194498-65195147	Promoter_Associated	NA
cg02351655	-1.92958	4.95419e-05	0.00535472	1.4388	0.000889903	0.00766838	37	16	4442918	F	CORO7	NM_024535	Body					TRUE			TRUE
cg02357751	-2.29383	2.25965e-07	9.31742e-05	-2.39279	1.12946e-08	4.57714e-07	37	22	19710880	R	GP1BB;SEPT5	NM_000407;NM_002688	TSS200;3'UTR	chr22:19709081-19712106	Island			NA	22:19710746-19712450	Unclassified_Cell_type_specific	TRUE
cg02363677	1.44016	1.41598e-05	0.00213229	1.68147	1.16243e-07	3.40675e-06	37	10	29811530	R	SVIL;SVIL	NM_021738;NM_003174	Body;Body					TRUE			NA
cg02371119	-0.705734	6.07535e-05	0.00621096	-0.573354	0.000378491	0.00371785	37	3	171527346	F	PLD1;PLD1	NM_001130081;NM_002662	5'UTR;5'UTR	chr3:171527617-171528458	N_Shore			NA			NA
cg02382532	-2.15378	1.62917e-05	0.00236015	-2.71543	2.01492e-08	7.55162e-07	37	6	42110867	F	C6orf132	NM_001164446	TSS200	chr6:42109904-42110361	S_Shore			NA	6:42109893-42110884	Unclassified_Cell_type_specific	TRUE
cg02389513	1.20992	1.72454e-05	0.00246763	1.76999	2.88158e-10	2.01461e-08	37	10	80224890	F								TRUE			NA
cg02390725	-2.77352	6.02214e-09	5.23636e-06	-3.31721	1.39725e-12	2.32288e-10	37	11	2925768	F	SLC22A18;SLC22A18;SLC22A18AS	NM_183233;NM_002555;NM_007105	Body;Body;TSS1500	chr11:2923301-2923817	S_Shore			TRUE			NA
cg02390947	0.759771	8.60867e-05	0.00797332	0.732659	4.71649e-05	0.000620774	37	10	105273633	R	NEURL	NM_004210	Body					TRUE			NA
cg02410867	-3.02533	1.3423e-07	6.1093e-05	-3.99878	2.81681e-12	4.15635e-10	37	19	16198843	R	TPM4;TPM4	NM_001145160;NM_003290	Body;Body			low-CpG:16059836-16059885	CDMR	NA			NA
cg02417427	-3.13414	1.28587e-11	3.71901e-08	-3.66645	1.22933e-15	7.25085e-13	37	5	79479211	F	SERINC5	NM_178276	Body					TRUE			NA
cg02423000	-2.27171	4.1638e-05	0.00471539	-2.60958	7.48377e-07	1.70612e-05	37	5	601568	R				chr5:602124-602553	N_Shore			NA			NA
cg02427330	-1.09948	1.70799e-05	0.00244738	-1.21848	5.04754e-07	1.21504e-05	37	13	76450676	R								TRUE	13:76450495-76450875	Unclassified_Cell_type_specific	NA
cg02431732	-1.65582	0.000100474	0.00891703	-2.77531	1.28427e-10	1.01814e-08	37	22	42907591	R	SERHL	NR_027786	Body	chr22:42909975-42910247	N_Shelf			NA			TRUE
cg02432295	-1.21478	7.16032e-05	0.0070153	-1.62535	4.64921e-08	1.54874e-06	37	10	105412689	R	SH3PXD2A	NM_014631	Body					TRUE	10:105412621-105412943	Unclassified_Cell_type_specific	NA
cg02449103	-1.69471	6.80158e-05	0.00672741	-1.57085	6.81385e-05	0.000851505	37	6	31627711	F	C6orf47	NM_021184	1stExon	chr6:31628338-31628658	N_Shore			NA	6:31627694-31628805	Promoter_Associated	NA
cg02452500	-1.72962	1.00012e-06	0.000291324	-1.82877	4.5815e-08	1.5283e-06	37	11	13161927	F								TRUE	11:13161852-13162079	Unclassified_Cell_type_specific	NA
cg02454815	0.968194	4.36689e-06	0.000878141	0.966125	9.77015e-07	2.14487e-05	37	19	50363877	F	PTOV1	NM_017432	3'UTR	chr19:50364835-50366286	N_Shore			NA			NA
cg02458188	-2.67811	1.56453e-06	0.000410039	-3.76775	1.5384e-11	1.71646e-09	37	15	60966344	R	RORA	NM_134261	Body					TRUE			TRUE
cg02459469	-1.73441	4.32499e-05	0.0048508	-3.19943	5.8485e-13	1.13519e-10	37	12	115792152	F								TRUE			TRUE
cg02461011	-1.38389	0.000111613	0.00960458	-2.06591	5.48636e-09	2.47086e-07	37	15	90777825	F	C15orf58;CIB1	NM_001013657;NM_006384	5'UTR;TSS1500	chr15:90776699-90777636	S_Shore			NA	15:90776190-90777961	Promoter_Associated	NA
cg02463844	-1.37133	3.22896e-05	0.00390852	-1.0818	0.000331453	0.00332116	37	16	88152170	F				chr16:88153995-88154558	N_Shore		CDMR	NA			TRUE
cg02463911	-1.16537	0.000117202	0.00996778	-1.95083	1.89271e-10	1.41599e-08	37	16	88570208	R	ZFPM1	NM_153813	Body	chr16:88569267-88569491	S_Shore			NA	16:88570152-88570474	Unclassified_Cell_type_specific	NA
cg02473237	-1.4706	6.0206e-06	0.00111754	-1.47102	1.32696e-06	2.79905e-05	37	6	139004011	R								TRUE			NA
cg02487130	-1.00886	7.62485e-05	0.00733014	-1.27639	2.03629e-07	5.53641e-06	37	2	220349733	F	SPEG	NM_005876	Body	chr2:220348955-220349784	Island			NA	2:220348869-220350359	Unclassified	NA
cg02490847	-1.01306	9.84938e-05	0.00877973	-0.959918	7.11787e-05	0.00088424	37	16	75282051	R	BCAR1;BCAR1;BCAR1;BCAR1;BCAR1;BCAR1;BCAR1;BCAR1;BCAR1	NM_001170718;NM_001170719;NM_001170715;NM_001170720;NM_014567;NM_001170719;NM_001170714;NM_001170716;NM_001170717	Body;5'UTR;Body;Body;Body;1stExon;Body;Body;Body	chr16:75284680-75285821	N_Shelf			NA			NA
cg02491003	-1.63548	8.83939e-05	0.00811878	-1.98378	6.66425e-07	1.54292e-05	37	3	57581393	R	ARF4	NM_001660	Body	chr3:57583020-57583611	N_Shore		RDMR	NA			NA
cg02499214	-1.97943	8.23884e-05	0.00773442	-2.84221	9.11698e-09	3.81758e-07	37	12	122230490	F	RHOF	NM_019034	Body	chr12:122230903-122232359	N_Shore			NA	12:122230140-122231087	Promoter_Associated	NA
cg02499614	-1.46576	4.53257e-08	2.63524e-05	-1.70021	6.04615e-11	5.40593e-09	37	5	141250718	R	PCDH1;PCDH1	NM_032420;NM_002587	Body;Body					TRUE			NA
cg02506867	-1.37262	4.65236e-06	0.000921892	-1.13803	3.35049e-05	0.00046179	37	16	68121045	F	NFATC3;NFATC3;NFATC3;NFATC3	NM_173163;NM_173164;NM_004555;NM_173165	Body;Body;Body;Body	chr16:68118564-68119986	S_Shore		RDMR	NA			NA
cg02515422	-2.0719	3.47833e-06	0.000740803	-2.75161	3.92066e-10	2.60826e-08	37	9	120466493	R	TLR4;TLR4;TLR4;TLR4	NR_024169;NR_024168;NM_138554;NM_138554	Body;Body;1stExon;5'UTR			low-CpG:119506274-119506535		NA			NA
cg02523400	1.99508	3.15549e-07	0.000122089	2.68561	5.44475e-12	7.18651e-10	37	22	21128191	R	SERPIND1;PI4KA	NM_000185;NM_058004	TSS200;Body					NA			NA
cg02532293	0.832297	4.19371e-05	0.00474005	0.948213	9.03919e-07	2.00744e-05	37	4	1994816	F	WHSC2	NM_005663	Body	chr4:1994662-1994872	Island			NA			NA
cg02532700	-1.94428	2.32488e-06	0.000545702	-1.9964	2.52508e-07	6.66928e-06	37	22	37257404	F	NCF4;NCF4	NM_013416;NM_000631	Body;Body					NA	22:37256819-37257711	Promoter_Associated	NA
cg02544257	-2.41445	1.81518e-07	7.792e-05	-3.19964	4.06827e-12	5.67587e-10	37	16	70510663	R	FUK	NM_145059	Body	chr16:70507026-70507246	S_Shelf			TRUE	16:70510195-70511109	Unclassified	TRUE
cg02545556	1.21263	1.38286e-05	0.0020933	1.19977	4.15957e-06	7.53504e-05	37	16	88811348	R	FAM38A	NM_001142864	Body					TRUE			NA
cg02550119	-1.3126	0.000109494	0.00947823	-2.37804	1.10523e-11	1.29889e-09	37	17	33306727	R	LIG3;LIG3	NM_002311;NM_013975	TSS1500;TSS1500	chr17:33307352-33308246	N_Shore			NA			NA
cg02550950	-2.16854	3.31619e-07	0.000127101	-2.10891	1.06666e-07	3.16816e-06	37	2	197122104	R	HECW2	NM_020760	Body					NA			NA
cg02569108	-2.70886	4.12434e-11	9.39797e-08	-2.57575	1.71643e-11	1.88312e-09	37	1	17846746	F						low-CpG:17719274-17719415		NA			NA
cg02570298	-1.79998	7.17247e-05	0.00702103	-3.09693	2.47104e-11	2.54534e-09	37	13	53618826	F	OLFM4	NM_006418	Body					TRUE			NA
cg02578087	-5.99523	2.53909e-14	3.13773e-10	-5.99958	9.46151e-16	5.90879e-13	37	3	8671361	F	C3orf32	NM_015931	Body				DMR	NA	3:8671114-8671626	Unclassified_Cell_type_specific	TRUE
cg02580626	-1.06178	7.93061e-07	0.000243718	-1.42839	2.40058e-11	2.49037e-09	37	22	18572133	F	PEX26;PEX26	NM_017929;NM_001127649	3'UTR;3'UTR					NA	22:18571978-18572193	Gene_Associated_Cell_type_specific	NA
cg02585906	-0.995473	7.87995e-06	0.0013686	-0.813713	6.51034e-05	0.000818694	37	11	415088	F	SIGIRR;SIGIRR;SIGIRR	NM_001135053;NM_001135054;NM_021805	5'UTR;TSS200;5'UTR	chr11:416419-417650	N_Shore			NA			NA
cg02589672	-1.20359	1.84908e-05	0.00259932	-1.64998	2.37816e-09	1.20087e-07	37	22	41763128	F	TEF	NM_001145398	TSS1500					TRUE	22:41763076-41763760	Unclassified_Cell_type_specific	NA
cg02613295	-1.16465	6.54193e-05	0.0065436	-1.1406	2.7356e-05	0.000387235	37	7	2564256	R	LFNG;LFNG;LFNG;LFNG	NM_001166355;NM_001040167;NM_001040168;NM_002304	Body;Body;Body;Body	chr7:2565872-2566114	N_Shore			TRUE			NA
cg02638523	-1.17293	6.00192e-05	0.0061606	-2.37382	3.34539e-14	1.07001e-11	37	2	236548728	R	AGAP1;AGAP1	NM_014914;NM_001037131	Body;Body					TRUE			NA
cg02650512	-1.98977	4.19624e-05	0.0047416	-2.43056	1.87143e-07	5.14263e-06	37	17	27048975	R	RPL23A;SNORD4A;SNORD42A	NM_000984;NR_000010;NR_000014	Body;TSS1500;TSS1500	chr17:27046856-27047273	S_Shore			NA			NA
cg02660643	-2.66663	1.17536e-09	1.43939e-06	-3.34188	2.38577e-14	8.10772e-12	37	16	87491587	R	ZCCHC14	NM_015144	Body					TRUE			TRUE
cg02661728	-2.27945	4.07525e-05	0.00464999	-2.85071	1.01512e-07	3.03448e-06	37	7	17018326	F								TRUE			NA
cg02665650	2.03711	6.52807e-06	0.0011906	2.70682	1.06543e-09	6.06824e-08	37	6	34984838	R	ANKS1A	NM_015245	Body			low-CpG:35092779-35093041		NA			NA
cg02667677	-1.18782	2.14346e-05	0.00289973	-1.09348	2.41084e-05	0.000347158	37	6	106545984	F	PRDM1;PRDM1	NM_001198;NM_182907	Body;TSS1500					TRUE	6:106545472-106546097	Promoter_Associated_Cell_type_specific	NA
cg02692052	-0.98874	2.11404e-05	0.00286893	-1.26263	2.14836e-08	7.9697e-07	37	8	23082876	R	TNFRSF10A	NM_003844	TSS200	chr8:23081956-23082975	Island			NA	8:23081816-23083077	Promoter_Associated	TRUE
cg02697979	-2.62906	6.41386e-08	3.43705e-05	-2.65804	6.38043e-09	2.80681e-07	37	11	34265361	F	ABTB2	NM_145804	Body					TRUE			TRUE
cg02707152	-1.48625	5.66303e-10	7.74968e-07	-1.13536	1.18657e-07	3.46724e-06	37	11	64980819	R	SLC22A20	NM_001004326	TSS1500					TRUE			NA
cg02719954	0.603092	5.79719e-05	0.00600335	1.00086	5.26601e-11	4.79995e-09	37	8	23830907	R								TRUE			NA
cg02721693	-2.16071	4.52626e-09	4.17608e-06	-2.94384	4.85389e-15	2.21413e-12	37	1	182922705	F	C1orf14	NM_030933	TSS200	chr1:182921819-182922644	S_Shore			NA			NA
cg02725269	-2.3864	3.25591e-06	0.000705511	-2.62429	7.25636e-08	2.27157e-06	37	19	51327177	F	KLK1	NM_002257	TSS200	chr19:51330212-51330470	N_Shelf			NA			NA
cg02729383	-2.75241	7.15345e-05	0.00701252	-4.24051	8.94097e-10	5.217e-08	37	7	130625473	R								TRUE			NA
cg02732164	-1.09099	1.52368e-05	0.00224724	-1.22789	3.06223e-07	7.88476e-06	37	7	6869135	F				chr7:6865701-6866094	S_Shelf			NA			NA
cg02734358	-1.85281	9.22174e-06	0.00154315	-1.28541	0.000651873	0.00589948	37	4	90227074	R	GPRIN3	NM_198281	5'UTR	chr4:90228714-90229010	N_Shore			NA			NA
cg02737554	-1.55206	7.91199e-06	0.00137358	-1.23941	9.26056e-05	0.00110982	37	3	36690229	R								TRUE			NA
cg02743256	1.40541	1.23953e-08	9.14538e-06	1.26708	2.61287e-08	9.42038e-07	37	7	2109353	R	MAD1L1;MAD1L1;MAD1L1	NM_003550;NM_001013837;NM_001013836	Body;Body;Body	chr7:2107080-2107381	S_Shore			NA			TRUE
cg02768671	-1.6709	3.07314e-05	0.0037714	-1.35277	0.000227565	0.00240707	37	6	169470822	F								TRUE			TRUE
cg02774282	-2.52065	1.06102e-07	5.10243e-05	-3.03096	5.65196e-11	5.1027e-09	37	6	109615419	R	CCDC162	NR_028595	TSS200	chr6:109611449-109612230	S_Shelf			NA			NA
cg02785332	-1.43825	8.52789e-07	0.000257799	-1.75613	6.41418e-10	3.93343e-08	37	9	94647670	R	ROR2	NM_004560	Body	chr9:94648653-94648964	N_Shore			TRUE			NA
cg02815374	-1.54045	3.47408e-06	0.000740588	-2.04555	3.92857e-10	2.61224e-08	37	3	131760658	F								NA			NA
cg02829456	-1.01811	5.22484e-05	0.00556757	-1.02973	1.22543e-05	0.000192673	37	2	201982020	F	CFLAR;CFLAR;CFLAR	NM_001127184;NM_001127183;NM_003879	5'UTR;TSS1500;5'UTR	chr2:201983198-201983709	N_Shore		RDMR	NA	2:201980705-201982415	Promoter_Associated	NA
cg02835848	-1.11308	8.95796e-05	0.00819263	-1.42681	1.93073e-07	5.28393e-06	37	1	15250381	R	KIAA1026;KIAA1026;KIAA1026	NM_201628;NM_015209;NM_001018000	Body;Body;TSS1500	chr1:15250373-15251545	Island			NA	1:15250242-15251440	Unclassified	NA
cg02855207	-1.22393	5.00933e-05	0.00540287	-1.61254	3.79985e-08	1.29814e-06	37	11	73087016	R	RELT;RELT	NM_032871;NM_152222	TSS1500;TSS1500	chr11:73087229-73088294	N_Shore			NA	11:73086729-73087771	Promoter_Associated	NA
cg02857726	-2.24645	2.21598e-05	0.00297951	-2.86168	2.4687e-08	8.97477e-07	37	3	149088388	R	TM4SF1	NM_014220	Body					TRUE			NA
cg02864248	-2.22478	9.74668e-06	0.0016092	-3.61044	2.67442e-12	3.98044e-10	37	15	91411838	R	FURIN	NM_002569	TSS200	chr15:91414311-91415427	N_Shelf			NA			NA
cg02876276	1.61851	4.49138e-05	0.00499074	1.47217	6.03693e-05	0.00076711	37	17	77834299	R				chr17:77834063-77834368	Island			NA			NA
cg02877240	-1.35011	5.39058e-05	0.00569804	-1.80072	3.12353e-08	1.09687e-06	37	7	112089798	R	IFRD1;IFRD1	NM_001550;NM_001007245	TSS1500;5'UTR	chr7:112090122-112091412	N_Shore			NA			NA
cg02878439	-1.77797	8.43897e-05	0.00787516	-3.17738	9.54569e-12	1.14967e-09	37	16	87498480	R	ZCCHC14	NM_015144	Body				DMR	TRUE	16:87497550-87498792	Promoter_Associated_Cell_type_specific	TRUE
cg02882004	0.866349	4.11915e-05	0.00468304	0.734972	0.000154279	0.00172046	37	2	201334663	R	SPATS2L;SPATS2L;SPATS2L;SPATS2L	NM_001100422;NM_015535;NM_001100424;NM_001100423	Body;Body;Body;Body					TRUE			NA
cg02888247	-1.25237	0.000106414	0.0092925	-0.971658	0.00100536	0.00849541	37	6	24719235	F	C6orf62;C6orf62	NM_030939;NM_030939	1stExon;5'UTR	chr6:24720387-24721920	N_Shore			NA			NA
cg02888490	-2.98516	1.6949e-07	7.39235e-05	-3.23786	2.65531e-09	1.32006e-07	37	6	30130458	F	TRIM15	NM_033229	TSS1500					NA			NA
cg02894944	-2.90831	1.16393e-10	2.15753e-07	-3.31462	5.80809e-14	1.68102e-11	37	2	110859091	R	MALL	NM_005434	Body					TRUE			TRUE
cg02901644	-1.96519	1.42531e-06	0.000383618	-2.56058	1.76384e-10	1.33402e-08	37	2	234369787	R	DGKD;DGKD	NM_152879;NM_003648	Body;Body	chr2:234369786-234370099	Island			NA			NA
cg02904344	-1.85624	6.55509e-05	0.00655516	-1.8434	2.17191e-05	0.000317085	37	6	134498979	R	SGK1;SGK1;SGK1	NM_001143676;NM_001143677;NM_001143677	Body;1stExon;5'UTR	chr6:134497536-134497756	S_Shore	low-CpG:134540666-134540705	RDMR	NA	6:134498673-134500349	Promoter_Associated	NA
cg02906741	-3.03986	4.79272e-10	6.83389e-07	-2.38662	5.26047e-08	1.72281e-06	37	3	30623546	F								TRUE	3:30623536-30623588	Unclassified_Cell_type_specific	NA
cg02912129	-2.09539	1.14982e-05	0.00182239	-3.92714	1.28946e-14	4.91905e-12	37	20	57615494	R	SLMO2	NM_016045	Body	chr20:57617430-57618222	N_Shore		CDMR	NA			NA
cg02915939	-1.2731	1.17752e-10	2.17284e-07	-0.989511	2.19165e-08	8.1067e-07	37	6	30711022	R	IER3;FLOT1	NM_003897;NM_005803	3'UTR;TSS1500	chr6:30710307-30712440	Island			NA	6:30710361-30712511	Promoter_Associated	NA
cg02916425	-0.620501	0.000104537	0.00916981	-0.570954	0.000116376	0.00135102	37	2	74645552	R	C2orf81	NM_001145054	TSS1500	chr2:74645467-74645750	Island			NA			NA
cg02919368	1.2408	6.36376e-05	0.00641257	1.30403	7.7166e-06	0.000129171	37	7	143012	F								NA			NA
cg02919564	-0.914792	1.62759e-08	1.14833e-05	-0.702624	1.43695e-06	2.99803e-05	37	6	47210376	F	TNFRSF21	NM_014452	Body					TRUE	6:47210252-47210611	Unclassified_Cell_type_specific	TRUE
cg02933228	-1.15796	3.89985e-05	0.00450403	-1.24839	2.58837e-06	4.99478e-05	37	11	64611087	F	CDC42BPG	NM_017525	Body	chr11:64611714-64612634	N_Shore			TRUE	11:64610375-64613007	Promoter_Associated	NA
cg02936493	-2.51632	2.25156e-05	0.0030174	-2.92254	2.50562e-07	6.62517e-06	37	7	73223935	R								NA			NA
cg02937491	-1.72298	5.65601e-05	0.00589607	-1.74181	1.35302e-05	0.000209933	37	18	55888790	R	NEDD4L;NEDD4L;NEDD4L;NEDD4L;NEDD4L;NEDD4L;NEDD4L;NEDD4L;NEDD4L;NEDD4L	NM_001144964;NM_015277;NM_001144971;NM_001144966;NM_001144965;NM_001144968;NM_001144966;NM_001144967;NM_001144969;NM_001144970	5'UTR;Body;5'UTR;5'UTR;5'UTR;Body;1stExon;Body;Body;5'UTR			low-CpG:54039712-54039821		NA			NA
cg02937873	0.764989	8.17241e-05	0.00770156	0.821001	7.11852e-06	0.00012037	37	19	36595986	F	WDR62;WDR62	NM_001083961;NM_173636	3'UTR;3'UTR					NA			NA
cg02949186	-1.80275	4.34601e-06	0.000874788	-2.48453	1.73011e-10	1.31362e-08	37	21	42733776	F	MX2	NM_002463	TSS200					NA	21:42733352-42734832	Promoter_Associated	NA
cg02960777	-1.6103	9.07276e-07	0.00026928	-2.65673	1.19721e-14	4.61899e-12	37	7	77562848	F	PHTF2;PHTF2;PHTF2	NM_001127358;NM_001127357;NM_020432	Body;Body;Body					TRUE			NA
cg02979487	-2.63177	9.93446e-11	1.89314e-07	-3.31492	6.56165e-16	4.36553e-13	37	4	88014081	R	AFF1;AFF1	NM_001166693;NM_005935	Body;Body					TRUE			TRUE
cg02983759	-1.39694	9.16916e-05	0.00833109	-1.29281	9.39968e-05	0.00112411	37	21	43098598	F	NCRNA00111	NR_024367	TSS1500					TRUE			NA
cg02985540	-2.72564	8.17086e-10	1.04783e-06	-3.28334	7.41171e-14	2.05056e-11	37	13	46964186	R				chr13:46960684-46961670	S_Shelf			NA	13:46963991-46964609	Unclassified_Cell_type_specific	NA
cg02992118	-1.19492	4.47329e-06	0.000894667	-1.75712	2.05789e-11	2.19403e-09	37	16	88470787	F							CDMR	TRUE	16:88470167-88471216	Unclassified_Cell_type_specific	NA
cg02997316	-1.60869	2.02906e-09	2.26081e-06	-1.42725	7.16381e-09	3.10427e-07	37	1	156093624	F	LMNA;LMNA;LMNA	NM_005572;NM_170707;NM_170708	Body;Body;Body					TRUE	1:156093581-156093726	Promoter_Associated	TRUE
cg03003434	-3.16802	4.05116e-09	3.82481e-06	-2.52993	1.98731e-07	5.41878e-06	37	6	159141722	R	SYTL3	NM_001009991	Body					TRUE	6:159141476-159141880	Unclassified_Cell_type_specific	TRUE
cg03003746	-2.05267	1.39814e-05	0.00211017	-1.62303	0.000167218	0.00184428	37	1	1102833	R	MIR200A	NR_029834	TSS1500	chr1:1098043-1100584	S_Shelf			NA			NA
cg03008204	0.585243	7.40735e-05	0.00717688	0.725018	3.17756e-07	8.14166e-06	37	4	1828697	R	LETM1	NM_012318	Body	chr4:1828588-1828802	Island			NA			NA
cg03016867	-1.51339	8.54923e-06	0.00145562	-1.45889	4.09484e-06	7.43199e-05	37	5	148442890	F	SH3TC2	NM_024577	TSS200					TRUE			NA
cg03018679	1.00518	7.35459e-05	0.0071516	1.44538	7.0928e-09	3.07841e-07	37	12	120241922	R	CIT	NM_007174	Body	chr12:120241921-120242233	Island			TRUE	12:120241254-120242709	Unclassified_Cell_type_specific	NA
cg03032053	-1.71144	8.82911e-05	0.00811299	-2.23886	1.15768e-07	3.3956e-06	37	7	1495311	F	MICALL2	NM_182924	Body	chr7:1498575-1499123	N_Shelf			NA	7:1495005-1495414	Unclassified_Cell_type_specific	TRUE
cg03033182	-1.93075	1.19041e-05	0.00187253	-2.33213	3.87988e-08	1.32194e-06	37	4	141177619	R	SCOC	NM_032547	TSS1500	chr4:141173834-141174567	S_Shelf			NA			TRUE
cg03034696	-1.49276	5.76201e-06	0.00108334	-2.0203	4.93576e-10	3.16035e-08	37	2	47400023	F	CALM2	NM_001743	Body	chr2:47402809-47404105	N_Shelf			NA			NA
cg03039843	-2.62866	7.35975e-07	0.000231503	-2.98754	4.41951e-09	2.05296e-07	37	19	49055390	R	SULT2B1	NM_177973	TSS200					NA			NA
cg03043406	-1.48836	4.37243e-05	0.00489323	-1.51949	8.43926e-06	0.000139481	37	1	45242356	R	RPS8;SNORD38A	NM_001012;NR_001456	Body;TSS1500	chr1:45241013-45241900	S_Shore			NA	1:45240714-45242398	Promoter_Associated	NA
cg03046346	-1.19163	2.17974e-07	9.06125e-05	-0.873271	2.39482e-05	0.000345095	37	11	61658150	F	FADS3	NM_021727	Body	chr11:61658569-61659592	N_Shore			NA	11:61657946-61659805	Promoter_Associated	NA
cg03048225	-1.19336	4.79987e-05	0.00523651	-1.22461	8.55787e-06	0.00014118	37	16	68767789	F				chr16:68771034-68772344	N_Shelf			NA			NA
cg03052794	-2.78924	4.3282e-07	0.000154288	-3.78746	6.56537e-12	8.40359e-10	37	19	908894	R	C19orf22	NM_138774	Body	chr19:911689-911996	N_Shelf			NA	19:908609-909677	Unclassified	NA
cg03058163	-1.8374	6.89596e-08	3.65221e-05	-1.88537	4.55271e-09	2.10533e-07	37	1	1153338	F	SDF4;SDF4	NM_016176;NM_016547	Body;Body	chr1:1153784-1154419	N_Shore			NA	1:1153338-1153811	Gene_Associated_Cell_type_specific	NA
cg03065308	-3.55684	3.85553e-08	2.31561e-05	-5.81162	4.75584e-17	5.5255e-14	37	6	137538584	F	IFNGR1	NM_000416	Body	chr6:137540126-137540678	N_Shore			NA			NA
cg03074188	-1.71178	5.78401e-06	0.00108548	-1.6597	2.41151e-06	4.69371e-05	37	8	37557348	R				chr8:37557927-37558887	N_Shore		RDMR	NA	8:37557298-37558262	Unclassified_Cell_type_specific	NA
cg03082779	-1.60284	2.13732e-07	8.95495e-05	-1.23283	1.01805e-05	0.00016407	37	20	45947025	R	ZMYND8;LOC100131496;ZMYND8;ZMYND8	NM_183048;NR_024594;NM_183047;NM_012408	Body;TSS1500;Body;Body					TRUE			NA
cg03092399	1.00445	2.33901e-05	0.00309895	0.998284	6.82489e-06	0.000116112	37	11	108149307	F	ATM	NM_000051	Body					TRUE			NA
cg03123091	-1.90409	7.4226e-06	0.00130248	-1.37745	0.000340107	0.00339519	37	1	27080598	F	ARID1A;ARID1A	NM_006015;NM_139135	Body;Body					TRUE			NA
cg03124636	-2.39119	2.92672e-10	4.68301e-07	-2.70284	2.53238e-13	5.65252e-11	37	6	30711426	R	IER3;FLOT1	NM_003897;NM_005803	3'UTR;TSS1500	chr6:30710307-30712440	Island			NA	6:30710361-30712511	Promoter_Associated	NA
cg03128029	-3.00989	4.7891e-09	4.37895e-06	-3.50635	2.75963e-12	4.08786e-10	37	2	203143288	F	NOP58	NM_015934	Body			low-CpG:202851409-202851554		TRUE			NA
cg03128060	-2.53998	5.5218e-08	3.07205e-05	-2.47155	1.55472e-08	6.03483e-07	37	6	142623767	F	GPR126;GPR126;GPR126;GPR126	NM_020455;NM_001032394;NM_198569;NM_001032395	Body;Body;Body;Body	chr6:142622583-142623453	S_Shore	high-CpG:142664314-142665508		NA			NA
cg03129324	-1.74927	2.75476e-06	0.000621672	-1.85083	1.51824e-07	4.28949e-06	37	10	124889295	R				chr10:124892266-124893337	N_Shelf			NA			NA
cg03140412	-1.26263	4.46036e-07	0.00015817	-1.03311	5.86862e-06	0.000101728	37	11	415111	R	SIGIRR;SIGIRR;SIGIRR	NM_001135053;NM_001135054;NM_021805	5'UTR;TSS200;5'UTR	chr11:416419-417650	N_Shore			NA	11:415089-415302	Promoter_Associated	NA
cg03145386	-1.87637	5.25615e-07	0.000178772	-1.39973	3.36857e-05	0.000463936	37	6	167637331	R				chr6:167633931-167634140	S_Shelf			TRUE			NA
cg03157040	-0.851072	1.64355e-06	0.000425013	-0.823304	6.62745e-07	1.53554e-05	37	19	1861890	F	KLF16	NM_031918	Body	chr19:1861711-1861914	Island			NA	19:1861820-1862048	Promoter_Associated	NA
cg03162721	-1.88566	0.000103256	0.00910056	-2.04351	7.98062e-06	0.000133001	37	17	62660876	F				chr17:62657409-62658858	S_Shelf			NA			NA
cg03163545	-2.83132	1.19514e-06	0.00033517	-2.43141	5.52689e-06	9.64644e-05	37	16	1593415	R	IFT140;TMEM204	NM_014714;NM_024600	Body;Body	chr16:1591813-1592107	S_Shore			NA	16:1593179-1594034	Promoter_Associated_Cell_type_specific	NA
cg03174043	-1.56759	4.0868e-05	0.00465665	-1.44217	4.61112e-05	0.000608908	37	2	20548412	R				chr2:20550013-20551063	N_Shore			NA			NA
cg03185752	-1.18979	6.7262e-05	0.00667552	-1.42952	5.49268e-07	1.30761e-05	37	1	954631	F	AGRN	NM_198576	TSS1500	chr1:954768-956343	N_Shore			NA			NA
cg03196720	-1.68045	1.16982e-06	0.000329916	-2.03577	1.27981e-09	7.07676e-08	37	12	6473299	F	SCNN1A;SCNN1A;SCNN1A	NM_001159575;NM_001038;NM_001159576	Body;Body;Body	chr12:6472660-6473322	Island			NA	12:6472154-6473704	Promoter_Associated	NA
cg03199366	-2.18873	8.17143e-05	0.00770156	-3.65975	8.74461e-11	7.36034e-09	37	4	187740664	F								TRUE			NA
cg03204322	-2.02839	9.23589e-08	4.55985e-05	-2.44287	4.42701e-11	4.14948e-09	37	1	84767878	F	SAMD13;SAMD13;SAMD13	NM_001134664;NM_001134663;NM_001010971	TSS1500;5'UTR;Body	chr1:84764108-84764906	S_Shelf			NA			NA
cg03210827	1.69792	3.86477e-05	0.00447111	1.35955	0.000315859	0.0031873	37	10	104574906	F	C10orf26;C10orf26	NM_001083913;NM_017787	3'UTR;3'UTR					TRUE			NA
cg03211098	-3.95165	1.02329e-13	9.07174e-10	-3.92031	6.12072e-15	2.68682e-12	37	1	32039682	R								TRUE			TRUE
cg03216884	-3.28583	3.72525e-08	2.25658e-05	-5.23648	1.4257e-16	1.32439e-13	37	6	56514787	F	DST;DST;DST;DST	NM_001144770;NM_183380;NM_001144771;NM_001144769	Body;Body;Body;Body					TRUE			NA
cg03217587	-1.0562	9.37533e-05	0.00845862	-1.37459	1.44776e-07	4.11487e-06	37	2	239403003	R								NA	2:239402543-239403373	Unclassified_Cell_type_specific	NA
cg03221715	0.697644	2.53013e-07	0.000101956	0.791282	1.16731e-09	6.55513e-08	37	3	129148362	R	C3orf25	NM_207307	TSS1500	chr3:129147229-129147617	S_Shore			NA			NA
cg03240301	-1.73449	8.00116e-06	0.00138493	-1.52377	2.0688e-05	0.000303837	37	7	23387383	F	IGF2BP3	NM_006547	Body					NA			NA
cg03243965	-1.30144	4.30232e-05	0.00483335	-1.74656	1.81481e-08	6.88788e-07	37	19	16254516	F	HSH2D	NM_032855	5'UTR			low-CpG:16115454-16115551		NA	19:16254209-16254768	Promoter_Associated	NA
cg03249630	-2.9614	2.3132e-07	9.51901e-05	-3.12442	8.49156e-09	3.58941e-07	37	10	90611782	R	ANKRD22	NM_144590	TSS200					NA			NA
cg03256955	-1.46061	4.73441e-08	2.71931e-05	-1.29467	1.43852e-07	4.09145e-06	37	3	30649017	F	TGFBR2;TGFBR2	NM_001024847;NM_003242	Body;Body	chr3:30647987-30648881	S_Shore			NA	3:30647633-30649121	Promoter_Associated_Cell_type_specific	NA
cg03280622	-2.78877	1.14202e-06	0.000324317	-3.0209	2.87669e-08	1.0226e-06	37	8	145023013	R	PLEC1;PLEC1;PLEC1;PLEC1	NM_000445;NM_201378;NM_201379;NM_201380	Body;Body;Body;Body	chr8:145024449-145025179	N_Shore		RDMR	TRUE	8:145022519-145023324	Unclassified_Cell_type_specific	NA
cg03291548	1.07717	8.47486e-05	0.00789781	0.98342	0.000106015	0.00124696	37	22	18266804	R				chr22:18267968-18268250	N_Shore			NA			NA
cg03295554	-1.49085	3.59078e-06	0.000759509	-1.63693	8.53728e-08	2.60711e-06	37	11	128395450	F	ETS1	NM_001143820	Body	chr11:128391712-128392611	S_Shelf			NA	11:128395384-128395815	Unclassified_Cell_type_specific	NA
cg03298704	-1.3453	3.26223e-05	0.00393245	-1.01422	0.000581615	0.00535518	37	4	99427937	R	TSPAN5	NM_005723	Body					TRUE			NA
cg03301058	-2.74353	2.23181e-06	0.000531314	-3.72219	9.58566e-11	7.95625e-09	37	6	90007856	R	GABRR2	NM_002043	Body				DMR	TRUE	6:90007623-90008148	Unclassified	TRUE
cg03301498	-2.33791	3.47872e-06	0.000740803	-3.17834	1.85936e-10	1.39539e-08	37	19	39889222	R	MED29	NM_017592	3'UTR	chr19:39893181-39893613	N_Shelf			NA	19:39887683-39889561	Promoter_Associated	TRUE
cg03302135	0.718136	9.62337e-05	0.00862743	0.991701	3.43942e-08	1.19361e-06	37	20	61040825	R	GATA5	NM_080473	Body	chr20:61041273-61041723	N_Shore			NA			NA
cg03303585	-3.20581	9.02056e-12	2.78683e-08	-2.63471	5.05312e-10	3.2178e-08	37	4	75585178	R								TRUE			NA
cg03307103	0.971172	2.42197e-06	0.000563108	1.04396	8.82942e-08	2.68587e-06	37	13	31609975	F								TRUE			NA
cg03310518	-2.63458	3.55798e-11	8.45198e-08	-3.9282	4.23545e-20	1.96276e-16	37	7	30954522	R	AQP1	NM_198098	Body					TRUE			TRUE
cg03314569	-1.86375	2.10349e-07	8.85253e-05	-1.65792	5.40795e-07	1.28977e-05	37	1	32041732	F	TINAGL1	NM_022164	TSS1500					NA	1:32041676-32041808	Unclassified_Cell_type_specific	TRUE
cg03326606	-4.28357	3.51374e-10	5.4256e-07	-4.79468	4.64973e-13	9.45254e-11	37	20	49345567	R				chr20:49347365-49348659	N_Shore		CDMR	NA			NA
cg03327619	-1.27027	8.2382e-06	0.00141994	-1.12931	1.73418e-05	0.000260654	37	2	159810515	F								TRUE			TRUE
cg03328299	-2.62869	8.2173e-06	0.00141693	-3.09799	4.31106e-08	1.44864e-06	37	15	74281983	F	STOML1	NM_004809	Body	chr15:74284252-74284821	N_Shelf			TRUE			TRUE
cg03333699	-2.05662	2.95926e-06	0.000655869	-2.66292	6.6944e-10	4.07524e-08	37	7	966569	R	ADAP1	NM_006869	Body	chr7:965987-966266	S_Shore			NA			NA
cg03338682	-0.525931	2.42854e-06	0.000563671	-0.410546	5.16327e-05	0.000670596	37	21	33031751	F	SOD1	NM_000454	TSS200	chr21:33031734-33032657	Island			NA	21:33031276-33033203	Promoter_Associated	NA
cg03339537	1.46658	6.80044e-06	0.00122602	1.84047	6.03804e-09	2.67704e-07	37	2	157184816	R	NR4A2	NM_006186	Body	chr2:157185557-157186355	N_Shore		RDMR	NA	2:157184529-157184870	Unclassified_Cell_type_specific	NA
cg03339668	1.78483	6.8714e-06	0.00123562	2.48313	2.78072e-10	1.9538e-08	37	12	120241957	R	CIT	NM_007174	Body	chr12:120241921-120242233	Island			TRUE	12:120241254-120242709	Unclassified_Cell_type_specific	NA
cg03346415	0.561594	6.46629e-05	0.00648703	0.559258	2.04099e-05	0.000300272	37	16	69854895	R	WWP2;WWP2	NM_199423;NM_007014	Body;Body					TRUE			NA
cg03359362	-2.28995	2.06493e-12	8.86408e-09	-2.23475	2.89536e-13	6.32425e-11	37	19	47289611	R	SLC1A5;SLC1A5;SLC1A5	NM_001145145;NM_005628;NM_001145144	TSS1500;Body;5'UTR	chr19:47290585-47291983	N_Shore		RDMR	NA	19:47289523-47290312	Promoter_Associated	NA
cg03364683	-2.58815	5.07071e-06	0.000981421	-2.86421	1.09166e-07	3.23206e-06	37	4	169402298	F	DDX60L	NM_001012967	TSS1500	chr4:169401350-169401725	S_Shore		RDMR	NA	4:169401084-169402629	Promoter_Associated	TRUE
cg03386595	-2.03411	1.47209e-05	0.00219177	-1.8421	2.19974e-05	0.000320574	37	1	48194304	F				chr1:48190756-48190992	S_Shelf			NA			TRUE
cg03403880	0.881967	7.23372e-07	0.000228722	0.971779	1.03071e-08	4.23631e-07	37	2	157255372	R				chr2:157256808-157257111	N_Shore			NA			NA
cg03410269	-1.29209	4.08341e-06	0.00083638	-1.74707	2.88093e-10	2.0145e-08	37	12	7077969	R	PHB2;SCARNA12;PHB2	NM_007273;NR_003010;NM_001144831	Body;TSS1500;Body	chr12:7079500-7080129	N_Shore			NA			NA
cg03435277	0.717093	1.68032e-06	0.000432055	0.831062	7.63256e-09	3.27411e-07	37	12	104166357	R	NT5DC3	NM_001031701	3'UTR					TRUE			NA
cg03448840	0.843791	5.58016e-05	0.00583533	1.37418	9.10569e-11	7.6171e-09	37	2	232115234	R	ARMC9	NM_025139	Body	chr2:232114520-232114738	S_Shore			NA			NA
cg03449456	1.83075	3.88269e-06	0.000803337	-1.23934	0.000505899	0.00475714	37	1	3191219	F	PRDM16;PRDM16	NM_022114;NM_199454	Body;Body					NA			NA
cg03453469	-1.85846	4.99208e-07	0.000171797	-2.29683	2.02865e-10	1.4979e-08	37	8	144821712	F				chr8:144822011-144822805	N_Shore	low-CpG:144893547-144893809		NA			NA
cg03458633	-1.77372	2.00571e-06	0.000492733	-2.12942	3.58599e-09	1.71098e-07	37	10	4720663	F	LOC100216001	NR_024475	TSS1500					TRUE			NA
cg03460745	1.40543	1.04556e-06	0.000301332	2.13613	4.34914e-13	8.935e-11	37	3	171966142	R	FNDC3B;FNDC3B	NM_001135095;NM_022763	Body;Body					TRUE			NA
cg03466587	-2.38578	3.17735e-09	3.20727e-06	-1.55437	1.12044e-05	0.000178261	37	3	187704482	F								TRUE			TRUE
cg03467825	-1.70085	0.000107117	0.0093339	-2.54101	4.95335e-09	2.26406e-07	37	2	171551893	R								TRUE			NA
cg03478916	0.751601	1.22465e-05	0.00190671	1.12088	8.14347e-11	6.93596e-09	37	8	22421029	R	SORBS3	NM_005775	Body	chr8:22422534-22423702	N_Shore			NA			NA
cg03479209	-1.38139	6.09986e-05	0.00622876	-2.29103	6.01538e-11	5.38432e-09	37	3	58020999	F	FLNB;FLNB;FLNB;FLNB	NM_001164319;NM_001164317;NM_001164318;NM_001457	Body;Body;Body;Body					TRUE	3:58020682-58021088	Unclassified	NA
cg03487983	1.29206	1.42113e-05	0.00213696	1.86709	2.98932e-10	2.07747e-08	37	14	67729501	R	MPP5	NM_022474	5'UTR					TRUE			NA
cg03489427	-3.26393	2.6996e-07	0.000107615	-4.78012	1.71248e-13	4.0602e-11	37	8	119890170	F								TRUE			NA
cg03490766	1.21561	2.47194e-05	0.00323929	1.16695	1.35813e-05	0.000210565	37	6	169027019	F	SMOC2;SMOC2	NM_022138;NM_001166412	Body;Body					NA			NA
cg03492469	-1.29344	8.43713e-09	6.79979e-06	-1.15826	2.15936e-08	8.00541e-07	37	16	126855	F	MPG;MPG;MPG	NM_001015054;NM_002434;NM_001015052	TSS200;TSS1500;TSS1500	chr16:127448-128631	N_Shore			TRUE	16:126721-126953	Unclassified	NA
cg03497549	-1.17939	4.90016e-05	0.00531181	-1.14216	2.4144e-05	0.000347584	37	18	52534107	R	RAB27B	NM_004163	5'UTR					NA			NA
cg03526652	0.539352	5.73124e-05	0.00595329	0.613191	1.44168e-06	3.00697e-05	37	2	72977657	R	EXOC6B	NM_015189	Body					TRUE			NA
cg03527867	-1.12049	5.08964e-05	0.00545774	-1.48948	3.09511e-08	1.08838e-06	37	16	4401940	R	Magmas	NM_016069	TSS1500	chr16:4400955-4401572	S_Shore			NA	16:4400653-4401969	Promoter_Associated	NA
cg03535099	-2.68186	2.63234e-07	0.000105435	-2.89739	5.09897e-09	2.3197e-07	37	17	80847270	R	TBCD	NM_005993	Body					TRUE			TRUE
cg03538814	-1.03161	5.85816e-06	0.00109536	-1.1901	4.67305e-08	1.55528e-06	37	19	34667843	F	LSM14A;LSM14A	NM_001114093;NM_015578	Body;Body	chr19:34662931-34664060	S_Shelf			NA			NA
cg03542031	-0.679289	5.21146e-05	0.00555767	-0.568465	0.000227474	0.00240616	37	1	28906210	R	SNHG12;SNORD99	NR_024127;NR_003077	Body;TSS1500	chr1:28908069-28908799	N_Shore			NA			NA
cg03548384	-2.54742	6.8922e-06	0.00123654	-3.59006	1.8477e-10	1.38766e-08	37	16	84403863	R	ATP2C2	NM_014861	Body	chr16:84401957-84402497	S_Shore			NA			NA
cg03548415	-3.22894	2.83402e-09	2.94078e-06	-4.71037	1.11262e-16	1.09597e-13	37	11	111991342	R							CDMR	TRUE			NA
cg03550233	-1.28715	7.81851e-05	0.00746528	-1.85649	7.29937e-09	3.1553e-07	37	17	39685482	R	KRT19	NM_002276	TSS1500	chr17:39683908-39684599	S_Shore			NA	17:39685428-39685520	Unclassified_Cell_type_specific	NA
cg03565280	-1.53257	4.37383e-05	0.00489346	-1.91939	1.0931e-07	3.23576e-06	37	5	167755242	R	WWC1;WWC1;WWC1	NM_001161662;NM_015238;NM_001161661	Body;Body;Body					TRUE			NA
cg03567939	-2.86302	2.2889e-06	0.00053955	-3.63868	7.99825e-10	4.74363e-08	37	7	151506147	R	PRKAG2;PRKAG2	NM_001040633;NM_016203	5'UTR;Body					NA	7:151506132-151506419	Unclassified_Cell_type_specific	TRUE
cg03569876	-1.08864	2.63161e-05	0.00338286	-1.40215	2.41991e-08	8.82611e-07	37	5	148908014	R	CSNK1A1;CSNK1A1	NM_001025105;NM_001892	Body;Body					TRUE			NA
cg03601836	-2.60684	1.45184e-06	0.000387985	-3.21208	1.04564e-09	5.96554e-08	37	3	190037695	R	CLDN1	NM_021101	Body	chr3:190039817-190040465	N_Shelf			NA			NA
cg03607573	-1.8827	2.90274e-07	0.000114295	-1.7978	1.44356e-07	4.10466e-06	37	11	93471889	R	TAF1D	NM_024116	Body	chr11:93474085-93475075	N_Shelf			NA			NA
cg03613625	-0.960396	7.20743e-05	0.0070445	-1.07844	2.52656e-06	4.89008e-05	37	20	57408174	R	GNASAS	NR_002785	Body				CDMR	TRUE			NA
cg03614721	-1.63295	2.30606e-05	0.00307127	-1.91133	2.16043e-07	5.83194e-06	37	5	8700943	R								TRUE			NA
cg03618113	-2.09268	4.1614e-07	0.00014965	-2.14404	3.69412e-08	1.26893e-06	37	12	90163145	R								TRUE			TRUE
cg03634729	-1.39203	4.06339e-06	0.000833955	-0.996212	0.000259552	0.00269656	37	18	21452829	F	LAMA3;LAMA3;LAMA3;LAMA3	NM_001127718;NM_000227;NM_198129;NM_001127717	TSS200;TSS200;Body;Body					NA			NA
cg03634833	-3.24592	3.47678e-09	3.39198e-06	-3.91301	4.95367e-13	9.92204e-11	37	7	965534	R	ADAP1	NM_006869	Body	chr7:965987-966266	N_Shore			NA			NA
cg03643998	-1.67461	2.86102e-05	0.00358996	-2.26366	7.47339e-09	3.21843e-07	37	17	77042455	R	C1QTNF1;C1QTNF1;C1QTNF1	NM_198594;NM_030968;NM_198593	5'UTR;Body;Body	chr17:77043741-77044489	N_Shore			NA	17:77041744-77042673	Unclassified	NA
cg03652336	-3.58089	3.72819e-11	8.73776e-08	-1.61576	0.000344664	0.00343371	37	4	141017399	F	MAML3	NM_018717	Body					TRUE	4:141017179-141017620	Unclassified_Cell_type_specific	NA
cg03653573	-2.31166	1.02058e-06	0.000295511	-2.88262	4.32061e-10	2.82185e-08	37	5	131762326	F	C5orf56	NM_001013717	Body			low-CpG:131790207-131790302		NA	5:131762276-131763401	Promoter_Associated	TRUE
cg03653880	-2.04956	5.20477e-08	2.93167e-05	-2.30314	2.05475e-10	1.5117e-08	37	2	26254790	F				chr2:26256301-26257567	N_Shore			NA			NA
cg03655330	-2.13939	3.53713e-06	0.000750497	-2.59112	6.26331e-09	2.76369e-07	37	3	50337494	R	HYAL1;HYAL1;HYAL1;NAT6;HYAL1;HYAL1;HYAL1;HYAL3	NM_007312;NM_153281;NM_153285;NM_012191;NM_153282;NM_153283;NM_033159;NM_003549	3'UTR;3'UTR;3'UTR;TSS1500;3'UTR;3'UTR;3'UTR;TSS1500	chr3:50336331-50336879	S_Shore			NA	3:50335451-50337508	Promoter_Associated	NA
cg03656099	-1.81637	6.162e-07	0.000202001	-1.94033	1.95617e-08	7.35986e-07	37	17	59481954	F	TBX2	NM_005994	Body	chr17:59473060-59483266	Island		DMR	TRUE			NA
cg03661164	-0.802272	5.9269e-06	0.00110416	-0.586576	0.000253986	0.00264631	37	7	148560646	R	EZH2;EZH2	NM_004456;NM_152998	5'UTR;5'UTR					TRUE			NA
cg03663556	-1.25596	7.94209e-06	0.00137705	-1.27648	1.29864e-06	2.74656e-05	37	7	50900556	R								TRUE			NA
cg03676624	-2.8699	4.40303e-07	0.000156682	-3.42597	5.10137e-10	3.23927e-08	37	11	77313686	R	AQP11	NM_173039	Body					TRUE			TRUE
cg03693486	-1.75369	6.57032e-05	0.00656556	-1.92903	3.37054e-06	6.28065e-05	37	1	20914322	R	CDA	NM_001785	TSS1500					NA			NA
cg03714916	-1.32583	1.10193e-05	0.00176432	-1.46916	2.87215e-07	7.45938e-06	37	6	36645886	F	CDKN1A;CDKN1A	NM_078467;NM_000389	TSS1500;TSS1500	chr6:36646244-36648465	N_Shore		RDMR	NA			NA
cg03716908	1.2989	1.59442e-05	0.00233018	1.4745	2.66677e-07	7.00268e-06	37	5	81149002	F								TRUE	5:81147025-81149013	Promoter_Associated	NA
cg03721281	1.66667	9.84828e-06	0.00162138	2.06113	1.57769e-08	6.11064e-07	37	17	40557138	R	PTRF	NM_012232	Body	chr17:40556632-40557537	Island			NA			NA
cg03747456	-2.20467	5.12792e-05	0.00549012	-2.59417	5.9023e-07	1.39019e-05	37	12	52586127	F	KRT80;KRT80	NM_001081492;NM_182507	TSS1500;TSS1500					TRUE			TRUE
cg03748986	-1.26625	5.84119e-07	0.000193821	-0.797492	0.000401308	0.00390893	37	1	3340187	R	PRDM16;PRDM16	NM_022114;NM_199454	Body;Body	chr1:3342012-3342806	N_Shore			NA			NA
cg03764062	-0.959969	1.39974e-05	0.00211179	-0.969614	2.81052e-06	5.36356e-05	37	11	64008174	R	FKBP2;FKBP2;FKBP2	NM_057092;NM_004470;NM_001135208	TSS1500;TSS1500;TSS1500	chr11:64008283-64009487	N_Shore			NA			NA
cg03765041	-0.707666	4.14318e-05	0.00469595	-0.51892	0.000944629	0.00806379	37	7	158620335	R	ESYT2	NM_020728	Body	chr7:158621005-158622747	N_Shore			NA	7:158620192-158620487	Promoter_Associated	NA
cg03771840	3.41195	3.60115e-06	0.000761308	4.41595	9.20559e-10	5.34845e-08	37	6	30140145	R	TRIM15	NM_033229	3'UTR	chr6:30139718-30140263	Island			TRUE	6:30137754-30140152	Unclassified	NA
cg03781748	-1.67546	4.97326e-05	0.00536822	-2.30366	1.20858e-08	4.85007e-07	37	10	32229887	R								TRUE			NA
cg03784170	-1.24287	4.5707e-05	0.00504726	-3.48452	2.58897e-21	2.60986e-17	37	17	8121849	F				chr17:8124704-8125188	N_Shelf			NA			NA
cg03785456	1.19561	7.11056e-05	0.00698053	3.28149	3.63438e-20	1.78568e-16	37	2	134255543	R	NCKAP5;NCKAP5	NM_207363;NM_207481	Body;Body					TRUE			NA
cg03787088	-5.02442	1.09874e-13	9.33483e-10	-4.7543	4.78135e-14	1.42846e-11	37	11	34847603	R								TRUE			NA
cg03792042	-2.2751	0.000103246	0.00910056	-3.15067	3.62252e-08	1.2476e-06	37	8	145045235	R	PLEC1;PLEC1	NM_000445;NM_201378	Body;Body	chr8:145047293-145052305	N_Shelf			NA			TRUE
cg03800281	0.943866	7.3565e-05	0.0071516	1.0629	2.45227e-06	4.76371e-05	37	10	72097146	F	LRRC20;LRRC20;LRRC20	NM_018239;NM_018205;NM_207119	Body;Body;Body					TRUE			NA
cg03807842	-1.9299	5.76625e-06	0.00108364	-2.56074	9.09762e-10	5.29326e-08	37	7	967038	F	ADAP1	NM_006869	Body	chr7:965987-966266	S_Shore			NA			NA
cg03807888	0.494797	3.2108e-06	0.000697591	0.497222	5.94808e-07	1.3992e-05	37	3	8580619	R	LMCD1	NM_014583	Body					TRUE			NA
cg03807919	-0.782749	4.86801e-05	0.00528539	-1.10999	4.92078e-09	2.25195e-07	37	11	67757297	F				chr11:67758154-67759445	N_Shore			NA			TRUE
cg03812546	0.835684	9.65825e-07	0.000282952	0.781989	7.89126e-07	1.78624e-05	37	12	118728016	R	TAOK3	NM_016281	5'UTR					TRUE			NA
cg03814316	1.25505	1.61823e-05	0.00234931	0.944794	0.000356329	0.00353197	37	16	29997655	R	TAOK2;TAOK2	NM_016151;NM_004783	Body;Body	chr16:29997636-29997849	Island			NA			NA
cg03818193	1.30356	3.46889e-05	0.0041291	2.03818	1.29622e-10	1.02681e-08	37	17	55623656	R	MSI2;MSI2	NM_138962;NM_170721	Body;Body					TRUE			NA
cg03822198	-1.50017	6.54022e-06	0.00119228	-1.43168	3.75688e-06	6.90184e-05	37	12	116997535	R	MAP1LC3B2	NM_001085481	5'UTR					TRUE	12:116996800-116998066	Unclassified	TRUE
cg03831847	-2.35131	1.13387e-05	0.00180343	-1.82964	0.000177096	0.00193906	37	16	88832485	R	FAM38A	NM_001142864	Body					NA			NA
cg03834909	-1.05934	0.000103029	0.00909034	-1.35324	2.62009e-07	6.89382e-06	37	19	1270334	F	CIRBP;C19orf23;CIRBP;CIRBP	NR_023313;NR_027271;NM_001280;NR_023312	Body;TSS200;5'UTR;Body	chr19:1265854-1269943	S_Shore			NA			NA
cg03844838	1.35954	1.64945e-05	0.0023836	1.64302	6.14815e-08	1.96847e-06	37	10	661087	R	DIP2C	NM_014974	Body					TRUE			NA
cg03844971	-1.80883	1.64165e-13	1.28744e-09	-1.50268	1.02175e-11	1.2155e-09	37	12	122518517	R	MLXIP	NM_014938	Body	chr12:122516193-122517207	S_Shore		RDMR	NA			TRUE
cg03848421	-2.96917	2.2955e-14	3.01972e-10	-2.94809	1.20357e-15	7.1444e-13	37	10	98508050	R				chr10:98510218-98510427	N_Shelf			NA	10:98507823-98508160	Unclassified_Cell_type_specific	NA
cg03850117	-1.50194	1.02421e-07	4.94291e-05	-1.21411	2.18744e-06	4.31169e-05	37	16	87894334	R	SLC7A5	NM_003486	Body	chr16:87894359-87894566	N_Shore			NA			TRUE
cg03851835	-3.29239	4.97919e-11	1.09168e-07	-2.53302	1.44273e-08	5.66104e-07	37	11	107711742	R	SLC35F2	NM_017515	Body					TRUE	11:107711482-107711774	Promoter_Associated_Cell_type_specific	TRUE
cg03861703	-2.21302	1.46283e-07	6.56162e-05	-2.0738	1.12621e-07	3.31724e-06	37	17	70587137	R				chr17:70587771-70589080	N_Shore			NA			NA
cg03867607	-1.11381	0.000104493	0.00916798	-2.21268	3.14687e-13	6.78639e-11	37	12	56554439	R	MYL6;MYL6	NM_021019;NM_079423	3'UTR;Body					TRUE	12:56554230-56554710	Promoter_Associated	NA
cg03873220	-0.943771	0.000110138	0.00950976	-1.24774	1.29405e-07	3.73131e-06	37	7	139760375	R	PARP12	NM_022750	Body	chr7:139762255-139763245	N_Shore		CDMR	TRUE			NA
cg03882698	-3.22355	5.06081e-09	4.5761e-06	-3.37387	1.23687e-10	9.87861e-09	37	3	69230955	F	FRMD4B	NM_015123	Body					TRUE			NA
cg03883275	-1.84587	1.98611e-08	1.35897e-05	-1.95955	3.87076e-10	2.58138e-08	37	10	49608385	R	MAPK8;MAPK8;MAPK8;MAPK8	NM_139049;NM_002750;NM_139046;NM_139047	TSS1500;TSS1500;TSS1500;TSS1500					TRUE			NA
cg03886254	2.27567	4.97964e-07	0.000171513	1.68449	3.67223e-05	0.000500585	37	1	9086648	F	SLC2A7	NM_207420	TSS1500					NA			NA
cg03891318	-1.81207	3.65806e-06	0.000769352	-1.88612	3.12602e-07	8.0257e-06	37	3	139372675	R	NMNAT3	NM_178177	5'UTR					TRUE			NA
cg03900085	-0.565909	3.23468e-05	0.00391313	-1.03548	3.97813e-13	8.30244e-11	37	7	99847222	R	GATS;GATS;GATS;GATS	NR_028040;NR_028038;NM_178831;NR_028039	Body;Body;Body;Body					NA			NA
cg03901576	-2.89765	1.28364e-08	9.36449e-06	-1.71389	0.000117418	0.00136141	37	3	187121780	R								TRUE			TRUE
cg03907363	-2.01808	5.05758e-06	0.000980276	-2.44314	1.06036e-08	4.33853e-07	37	19	51326682	R	KLK1	NM_002257	Body	chr19:51330212-51330470	N_Shelf			NA			NA
cg03907390	-1.52803	2.15904e-05	0.0029136	-3.03867	4.8375e-15	2.2116e-12	37	10	121066392	F	GRK5	NM_005308	Body					TRUE	10:121065220-121066631	Promoter_Associated	TRUE
cg03921696	-2.05639	7.35095e-08	3.82366e-05	-2.57775	7.93933e-12	9.841e-10	37	3	156848137	R								NA	3:156846812-156848780	Unclassified_Cell_type_specific	NA
cg03930153	-2.59016	2.1711e-08	1.45862e-05	-3.50259	7.17814e-14	1.99134e-11	37	3	176868896	R	TBL1XR1	NM_024665	5'UTR					TRUE	3:176868864-176869023	Promoter_Associated_Cell_type_specific	NA
cg03935116	-1.08439	2.74613e-05	0.00349418	-1.08319	7.42928e-06	0.000125008	37	12	31476565	R	FAM60A;FAM60A;FLJ13224;FAM60A	NM_021238;NM_001135811;NR_026806;NM_001135812	5'UTR;5'UTR;TSS1500;5'UTR	chr12:31476717-31479466	N_Shore		RDMR	NA			NA
cg03940776	-1.24954	4.39274e-06	0.000880871	-0.994387	6.10271e-05	0.00077419	37	6	158490013	F	SYNJ2	NM_003898	Body					TRUE			TRUE
cg03944375	-2.4075	3.30318e-08	2.05282e-05	-3.11391	7.77668e-13	1.4363e-10	37	1	22143533	F	LDLRAD2	NM_001013693	Body	chr1:22140891-22141407	S_Shelf			NA			TRUE
cg03946955	-1.6893	4.59958e-11	1.03631e-07	-1.58531	3.0282e-11	3.001e-09	37	1	156096301	R	LMNA;LMNA;LMNA	NM_005572;NM_170707;NM_170708	Body;Body;Body					NA	1:156096056-156096312	Unclassified_Cell_type_specific	TRUE
cg03950166	-1.07333	6.71978e-07	0.000215776	-1.09482	7.14131e-08	2.24009e-06	37	15	80988613	R	FAM108C1	NM_021214	Body	chr15:80987196-80988664	Island			NA			TRUE
cg03956042	-1.61471	2.91297e-06	0.000649492	-1.55204	1.39284e-06	2.91813e-05	37	3	194206497	R				chr3:194207385-194208785	N_Shore		RDMR	NA			NA
cg03959186	-1.42793	6.11316e-08	3.31553e-05	-1.32624	5.82799e-08	1.87791e-06	37	2	9893528	F								TRUE	2:9893287-9893694	Unclassified	TRUE
cg03961030	-2.71491	7.23864e-08	3.77567e-05	-4.35208	3.59793e-16	2.73231e-13	37	1	6333796	R	ACOT7;ACOT7;ACOT7;ACOT7	NM_181864;NM_181865;NM_007274;NM_181866	Body;Body;Body;Body					TRUE			TRUE
cg03968911	-1.48875	6.09121e-07	0.000200648	-1.7849	7.00497e-10	4.23648e-08	37	10	118734132	R	KIAA1598;KIAA1598	NM_018330;NM_001127211	Body;Body					TRUE			NA
cg03984209	-3.03373	9.61698e-15	1.78266e-10	-2.89753	2.66574e-15	1.36058e-12	37	3	55920018	R	ERC2	NM_015576	Body					TRUE			NA
cg03985478	-1.45968	5.69261e-05	0.00592362	-1.80762	2.14474e-07	5.79573e-06	37	1	19596472	F	AKR7L;AKR7L	NM_001145289;NM_201252	Body;Body	chr1:19600249-19600942	N_Shelf			NA			TRUE
cg03988297	-1.90944	3.20409e-05	0.0038865	-1.37868	0.000939559	0.00802757	37	1	219060547	F								TRUE			NA
cg03989617	-1.12936	3.97087e-05	0.00456666	-0.817465	0.00105715	0.00886312	37	16	57662541	F	GPR56;GPR56;GPR56;GPR56;GPR56;GPR56;GPR56;GPR56;GPR56;GPR56;GPR56;GPR56	NM_001145773;NM_001145771;NM_005682;NM_201524;NM_001145773;NM_001145771;NM_201525;NM_201524;NM_201525;NM_001145772;NM_001145770;NM_001145772	5'UTR;1stExon;5'UTR;1stExon;1stExon;5'UTR;5'UTR;5'UTR;1stExon;5'UTR;5'UTR;1stExon					TRUE	16:57662485-57662610	Unclassified_Cell_type_specific	NA
cg04002454	-1.1328	2.90803e-05	0.00362884	-0.956582	0.000121661	0.0014033	37	2	231191893	R	SP140L;SP140L	NM_138402;NM_138402	5'UTR;1stExon			low-CpG:230900121-230900220		NA	2:231191488-231192367	Promoter_Associated	TRUE
cg04003871	1.7985	1.50416e-07	6.70386e-05	2.11786	1.81496e-10	1.36788e-08	37	2	241290895	R				chr2:241293841-241294408	N_Shelf			NA			NA
cg04009429	-1.36974	3.37047e-05	0.00402961	-2.43406	1.34373e-12	2.24859e-10	37	7	100883125	F	FIS1	NM_016068	Body					NA			NA
cg04012618	0.468328	1.33621e-06	0.000365397	0.363497	3.56403e-05	0.000487514	37	16	21548169	F								NA			NA
cg04012931	-1.70834	5.46062e-11	1.17823e-07	-1.61174	3.0016e-11	2.98334e-09	37	6	30711164	F	IER3;FLOT1	NM_003897;NM_005803	3'UTR;TSS1500	chr6:30710307-30712440	Island			NA	6:30710361-30712511	Promoter_Associated	NA
cg04015687	-1.24663	7.65625e-05	0.00734795	-2.38159	6.32341e-13	1.21695e-10	37	5	16510489	F	FAM134B;FAM134B	NM_019000;NM_001034850	TSS1500;Body					NA			NA
cg04016485	-2.39145	3.25499e-08	2.03589e-05	-1.37362	0.000281746	0.0028918	37	12	26244324	F								TRUE			NA
cg04029159	-1.24775	4.91441e-09	4.46351e-06	-1.19838	1.75614e-09	9.26228e-08	37	11	415080	F	SIGIRR;SIGIRR;SIGIRR	NM_001135053;NM_001135054;NM_021805	5'UTR;TSS200;5'UTR	chr11:416419-417650	N_Shore			NA			NA
cg04030584	-2.68551	1.89123e-06	0.000471712	-3.25464	2.50759e-09	1.25751e-07	37	16	67871218	F	CENPT	NM_025082	5'UTR	chr16:67867658-67867898	S_Shelf			NA			NA
cg04035728	-1.1676	2.53554e-05	0.00329236	-1.47022	4.11643e-08	1.39138e-06	37	8	27323467	R	CHRNA2	NM_000742	Body	chr8:27320914-27321276	S_Shelf			NA	8:27323141-27323688	Unclassified	TRUE
cg04039799	-2.52252	2.97586e-07	0.000116465	-3.57493	7.27256e-13	1.36023e-10	37	11	19745484	R	NAV2;NAV2;NAV2	NM_182964;NM_001111018;NM_145117	Body;Body;Body				DMR	NA	11:19745373-19745769	Unclassified_Cell_type_specific	NA
cg04048517	-1.06308	7.82451e-05	0.00746576	-1.29108	5.40776e-07	1.28977e-05	37	2	202097062	R	CASP8;CASP8;CASP8;CASP8	NM_001080124;NM_001228;NM_033355;NM_033358	TSS1500;TSS1500;TSS1500;TSS1500					TRUE	2:202096849-202097278	Promoter_Associated	NA
cg04057956	-2.27064	2.89711e-09	2.98977e-06	-1.64723	1.30615e-06	2.75978e-05	37	12	6339200	F	CD9	NM_001769	Body					TRUE			TRUE
cg04071104	-3.04611	1.55279e-07	6.883e-05	-3.96146	6.35263e-12	8.15946e-10	37	3	53878642	F	CHDH	NM_018397	5'UTR	chr3:53879638-53880831	N_Shore			NA			NA
cg04077085	0.920116	6.62996e-06	0.00120326	0.973242	4.40473e-07	1.08007e-05	37	4	9937674	R	SLC2A9;SLC2A9	NM_020041;NM_001001290	Body;Body					TRUE			NA
cg04077141	-1.45353	5.76306e-11	1.23695e-07	-1.24587	7.20038e-10	4.33537e-08	37	22	36782143	R	MYH9	NM_002473	5'UTR	chr22:36782965-36784492	N_Shore			NA	22:36782032-36782176	Promoter_Associated	NA
cg04082512	-1.1137	1.31082e-07	5.99952e-05	-1.20795	1.94001e-09	1.00924e-07	37	16	85626417	F								TRUE			TRUE
cg04089901	-2.00977	2.49063e-08	1.64086e-05	-1.57952	1.24043e-06	2.63754e-05	37	7	7557590	R	COL28A1	NM_001037763	Body					NA			NA
cg04101755	-1.46525	4.83903e-05	0.00525813	-1.59605	2.76526e-06	5.28858e-05	37	16	3057959	R				chr16:3053830-3054315	S_Shelf		RDMR	TRUE	16:3057944-3058342	Unclassified_Cell_type_specific	NA
cg04102161	-1.61935	9.35428e-05	0.0084471	-2.85831	1.8901e-11	2.04183e-09	37	16	84578173	R								NA			NA
cg04102854	-2.23338	4.57323e-07	0.000160913	-3.44931	5.10066e-14	1.50294e-11	37	7	130005852	R	CPA5;CPA5;CPA5	NM_001127441;NM_001127442;NM_080385	Body;Body;Body					TRUE	7:130005421-130005984	Unclassified	TRUE
cg04107639	0.373845	5.59481e-05	0.00584723	0.274043	0.00116659	0.00962959	37	12	123341681	R	HIP1R	NM_003959	Body					NA	12:123341161-123341691	Unclassified	NA
cg04119678	-1.37668	1.18675e-08	8.87059e-06	-1.11863	3.24427e-07	8.28653e-06	37	1	32402509	R	PTP4A2;PTP4A2	NM_080391;NM_080392	5'UTR;5'UTR	chr1:32403387-32404382	N_Shore			NA			NA
cg04147593	-1.64939	6.99585e-07	0.000222712	-2.06241	2.27565e-10	1.64426e-08	37	17	80196719	R	SLC16A3;SLC16A3;SLC16A3	NM_004207;NM_001042423;NM_001042422	Body;Body;Body	chr17:80194424-80194777	S_Shore			TRUE	17:80196037-80197268	Promoter_Associated_Cell_type_specific	TRUE
cg04155862	-1.39479	4.61683e-05	0.00508168	-1.8923	1.5275e-08	5.944e-07	37	3	127541172	R	MGLL;MGLL;MGLL	NM_001003794;NM_007283;NM_007283	5'UTR;5'UTR;1stExon	chr3:127541270-127542048	N_Shore			NA			TRUE
cg04156940	-1.79902	5.77548e-05	0.00598847	-3.11164	1.24995e-11	1.44688e-09	37	7	55197704	F	EGFR;EGFR;EGFR;EGFR	NM_201283;NM_201284;NM_201282;NM_005228	Body;Body;Body;Body					TRUE			NA
cg04173586	-3.6412	2.01342e-09	2.24954e-06	-2.74827	4.20121e-07	1.03621e-05	37	19	2167496	R	DOT1L	NM_032482	Body	chr19:2163632-2165603	S_Shore			NA			TRUE
cg04173992	1.01871	3.34305e-05	0.00400738	1.18539	4.15242e-07	1.02564e-05	37	5	149520651	R	PDGFRB	NM_002609	5'UTR					TRUE			NA
cg04184716	-3.10762	2.75121e-06	0.000621237	-5.43255	9.95629e-15	3.96118e-12	37	14	75084887	R								TRUE	14:75084703-75085451	Unclassified_Cell_type_specific	NA
cg04188351	-1.56604	2.07061e-06	0.000502919	-1.36235	7.12627e-06	0.000120476	37	11	33744823	R	CD59;CD59;CD59;CD59;CD59;CD59;CD59;CD59	NM_203330;NM_001127225;NM_203329;NM_001127226;NM_000611;NM_001127223;NM_001127227;NM_203331	5'UTR;TSS1500;5'UTR;TSS1500;5'UTR;TSS1500;TSS1500;5'UTR					TRUE			NA
cg04191989	1.43562	2.90359e-07	0.000114295	1.64025	1.11976e-09	6.33083e-08	37	7	630914	R	PRKAR1B;PRKAR1B;PRKAR1B;PRKAR1B;PRKAR1B;PRKAR1B	NM_001164759;NM_001164762;NM_001164758;NM_001164760;NM_001164761;NM_002735	Body;Body;Body;Body;Body;Body	chr7:631836-632135	N_Shore			NA			TRUE
cg04208434	-1.64884	4.65858e-05	0.00511383	-2.5334	4.10755e-10	2.71091e-08	37	3	129513427	F	TMCC1;TMCC1	NM_001017395;NM_001128224	Body;Body					TRUE	3:129513308-129513932	Unclassified_Cell_type_specific	NA
cg04212846	-2.20358	2.84983e-06	0.000637838	-2.37909	9.6882e-08	2.91256e-06	37	21	36168008	F	RUNX1;RUNX1	NM_001001890;NM_001754	Body;Body	chr21:36164144-36164934	S_Shelf		RDMR	TRUE			TRUE
cg04214573	-1.25137	9.19713e-05	0.00834611	-1.17565	7.54203e-05	0.000929851	37	10	114135847	R	ACSL5;ACSL5;ACSL5	NM_016234;NM_203379;NM_203380	TSS200;5'UTR;5'UTR			low-CpG:114125830-114126134		TRUE	10:114134365-114136516	Promoter_Associated	NA
cg04229372	0.495673	2.76195e-07	0.000109672	0.572944	7.35661e-10	4.41379e-08	37	13	113477850	F	ATP11A;ATP11A	NM_015205;NM_032189	Body;Body	chr13:113474080-113474352	S_Shelf			NA			NA
cg04231677	-1.45783	6.0616e-06	0.0011246	-1.26793	1.90335e-05	0.000282705	37	1	184808004	R	FAM129A	NM_052966	Body					TRUE			TRUE
cg04245131	-2.60732	3.22276e-08	2.02817e-05	-3.01889	4.11059e-11	3.8975e-09	37	1	235133338	R								TRUE			TRUE
cg04255391	-1.11576	7.52329e-05	0.00725977	-1.14329	1.4832e-05	0.000227497	37	8	145008397	R	PLEC1;PLEC1;PLEC1;PLEC1;PLEC1;PLEC1;PLEC1;PLEC1	NM_201378;NM_201384;NM_201382;NM_201381;NM_000445;NM_201380;NM_201383;NM_201379	Body;Body;Body;Body;Body;Body;Body;Body	chr8:145008908-145009407	N_Shore			NA	8:145007733-145008887	Unclassified	TRUE
cg04257163	-1.92447	3.49947e-05	0.00415767	-2.14622	1.12066e-06	2.41306e-05	37	12	89620072	R								TRUE	12:89620036-89620142	Unclassified	NA
cg04260584	-1.95577	6.42876e-05	0.00646051	-1.71535	0.000144428	0.00162545	37	2	100020390	R	REV1;REV1	NM_016316;NM_001037872	Body;Body					TRUE	2:100020126-100020404	Gene_Associated_Cell_type_specific	NA
cg04270347	-1.12977	1.98614e-09	2.23129e-06	-1.16653	6.64393e-11	5.85119e-09	37	19	46012688	F	VASP	NM_003370	Body	chr19:46009778-46011060	S_Shore			NA	19:46012605-46012721	Promoter_Associated	NA
cg04273763	-2.11761	1.68408e-05	0.00241737	-1.52153	0.000643701	0.00583563	37	17	17862149	R	TOM1L2;TOM1L2	NM_001033551;NM_001082968	Body;Body					TRUE	17:17861305-17862245	Unclassified_Cell_type_specific	TRUE
cg04276626	-2.32402	6.64371e-10	8.9321e-07	-2.56066	1.84052e-12	2.92393e-10	37	17	57918500	F	MIR21	NR_029493	TSS200					NA			NA
cg04277993	-3.02209	1.28217e-11	3.71901e-08	-2.83855	8.03971e-12	9.94427e-10	37	4	1331546	R	MAEA;MAEA	NM_005882;NM_001017405	Body;Body	chr4:1333378-1333676	N_Shore			NA			NA
cg04279139	-2.52826	8.18485e-05	0.00770996	-4.018	4.52176e-10	2.93396e-08	37	12	27925367	R	LOC100133893	NM_001146221	TSS1500					TRUE			NA
cg04280590	-2.5994	5.01858e-06	0.000974107	-4.4321	9.98171e-14	2.63127e-11	37	9	33510387	R	SUGT1P1	NR_003667	Body	chr9:33510858-33511221	N_Shore			NA			NA
cg04283637	-0.768466	4.32227e-06	0.000873026	-0.731893	2.54055e-06	4.91541e-05	37	6	74405447	F	CD109;CD109;CD109	NM_133493;NM_001159588;NM_001159587	TSS200;TSS200;TSS200	chr6:74405600-74406021	N_Shore		RDMR	NA	6:74405339-74406241	Unclassified	NA
cg04290171	-1.69922	5.34121e-05	0.00565568	-1.28406	0.000808964	0.00707831	37	1	207924482	R	CD46;CD46;CD46;CD46;CD46;CD46;CD46;CD46;CD46;CD46;CD46;CD46;CD46;CD46	NM_172356;NM_002389;NM_172350;NM_153826;NM_172361;NM_172360;NM_172353;NM_172357;NM_172352;NM_172358;NM_172354;NM_172359;NM_172355;NM_172351	TSS1500;TSS1500;TSS1500;TSS1500;TSS1500;TSS1500;TSS1500;TSS1500;TSS1500;TSS1500;TSS1500;TSS1500;TSS1500;TSS1500	chr1:207925171-207925964	N_Shore			NA			NA
cg04299808	-0.668856	3.0195e-05	0.00372689	-1.12966	6.8207e-12	8.64897e-10	37	16	11770053	R	SNN	NM_003498	Body					NA			NA
cg04304450	-1.59118	3.02624e-06	0.000667088	-1.53157	1.40814e-06	2.94659e-05	37	22	43525431	F	BIK	NM_001197	3'UTR					TRUE	22:43525265-43525437	Unclassified_Cell_type_specific	TRUE
cg04307274	-1.42406	2.94179e-09	2.99918e-06	-0.775826	0.000178253	0.00195021	37	16	57843521	R								TRUE			NA
cg04327247	-1.57847	1.5959e-05	0.0023308	-1.09568	0.000918989	0.00788055	37	9	100564659	R				chr9:100565727-100566179	N_Shore			NA			NA
cg04334496	-1.11361	3.95067e-05	0.0045537	-0.892351	0.000318406	0.003208	37	6	133953605	R								TRUE			NA
cg04334979	1.59403	7.09567e-05	0.00697263	1.27606	0.000513553	0.00481911	37	4	79732488	F	BMP2K;BMP2K	NM_017593;NM_198892	Body;Body					TRUE			NA
cg04344190	-2.28277	4.86625e-06	0.000954075	-2.17425	2.87065e-06	5.46528e-05	37	16	78218445	R	WWOX;WWOX	NM_016373;NM_130791	Body;Body					TRUE			NA
cg04356381	-1.52688	0.000103216	0.00910056	-1.56001	2.25155e-05	0.000327143	37	6	25050788	F								TRUE	6:25050501-25050935	Unclassified_Cell_type_specific	NA
cg04359558	1.262	5.4068e-05	0.0057086	2.62768	7.64686e-15	3.21486e-12	37	16	11648224	F	LITAF;LITAF;LITAF;LITAF	NM_001136473;NM_004862;NM_001136472;NR_024320	Body;Body;Body;Body					NA	16:11648184-11648300	Gene_Associated_Cell_type_specific	NA
cg04363281	-1.52767	3.29256e-06	0.000709823	-2.1623	4.44914e-11	4.16811e-09	37	2	121224648	R	LOC84931	NR_027181	TSS1500					NA			NA
cg04366994	-0.998611	2.93406e-07	0.000115161	-0.741545	2.37717e-05	0.00034283	37	10	134361203	R	INPP5A	NM_005539	Body	chr10:134359533-134359780	S_Shore			NA			NA
cg04375784	-1.39448	7.09309e-06	0.00126052	-1.75454	5.982e-09	2.65537e-07	37	6	133137810	F	RPS12;SNORD100;SNORA33	NM_001016;NR_002435;NR_002436	Body;TSS200;TSS1500	chr6:133135364-133135829	S_Shore			NA			NA
cg04383058	-2.32013	3.0465e-06	0.000669382	-2.93846	1.37115e-09	7.51561e-08	37	11	67273507	R	PITPNM1;PITPNM1	NM_004910;NM_001130848	TSS1500;TSS1500	chr11:67275067-67276431	N_Shore			NA	11:67273463-67273920	Promoter_Associated	NA
cg04384031	-2.21839	1.24976e-05	0.00193482	-2.82716	9.99236e-09	4.12358e-07	37	17	19631485	F				chr17:19627877-19628298	S_Shelf			TRUE			TRUE
cg04384912	-1.86852	5.64053e-07	0.000188235	-2.18266	1.39026e-09	7.60622e-08	37	15	80325923	R								TRUE	15:80325109-80326200	Unclassified_Cell_type_specific	TRUE
cg04388970	-1.52444	1.98975e-05	0.00274595	-1.22897	0.000169565	0.00186617	37	7	32541235	F	AVL9	NM_015060	Body					TRUE			NA
cg04403423	-2.3893	4.85951e-06	0.000953213	-3.2648	2.74862e-10	1.93458e-08	37	1	116917619	R	ATP1A1;ATP1A1	NM_001160233;NM_000701	Body;Body	chr1:116915291-116916813	S_Shore			NA	1:116917467-116917763	Promoter_Associated_Cell_type_specific	NA
cg04407215	-1.51624	1.23549e-08	9.14409e-06	-1.29645	1.00198e-07	3.00073e-06	37	3	53304322	R								TRUE			TRUE
cg04408104	-2.57392	6.86745e-08	3.64184e-05	-3.67412	4.8831e-14	1.44931e-11	37	2	160106670	F	WDSUB1;WDSUB1;WDSUB1	NM_001128213;NM_152528;NM_001128212	Body;Body;Body					TRUE			NA
cg04420889	-2.48941	4.35447e-05	0.00487849	-3.47575	6.25055e-09	2.75866e-07	37	20	42187103	R	SGK2	NM_170693	TSS1500					NA			NA
cg04420917	-1.96963	4.04169e-05	0.00462408	-1.89849	2.12908e-05	0.000311646	37	19	39303993	R	LGALS4	NM_006149	TSS1500					NA			NA
cg04421679	-0.976079	9.62959e-05	0.00862884	-0.990634	2.32472e-05	0.000336276	37	7	131192789	R	PODXL;PODXL	NM_001018111;NM_005397	Body;Body					TRUE	7:131192472-131192990	Unclassified	TRUE
cg04435807	-2.04327	2.6241e-05	0.00337737	-2.53921	6.06569e-08	1.94543e-06	37	10	90610522	R	ANKRD22	NM_144590	Body					TRUE			NA
cg04450037	1.12015	8.62312e-05	0.00798126	0.879646	0.000748579	0.00663074	37	16	11812041	R	TXNDC11	NM_015914	Body					TRUE			NA
cg04454571	-1.48777	0.000102388	0.00905143	-1.36074	0.000124271	0.00142905	37	11	61525216	R	DKFZP434K028;C11orf9;C11orf9	NR_026882;NM_013279;NM_001127392	TSS200;Body;Body					NA			NA
cg04456219	-3.33192	3.99547e-08	2.37576e-05	-1.77701	0.000762644	0.00673734	37	7	17274337	F							DMR	NA	7:17273827-17274485	Unclassified_Cell_type_specific	NA
cg04467093	1.1301	3.80683e-06	0.000792466	1.49638	4.97498e-10	3.17967e-08	37	5	133448932	F	TCF7	NM_003202	TSS1500	chr5:133449320-133451260	N_Shore			NA			NA
cg04470060	1.15747	2.24853e-05	0.00301532	1.70943	3.49213e-10	2.37113e-08	37	5	141870810	R								TRUE			NA
cg04470557	-1.79139	4.84971e-09	4.41457e-06	-2.28299	8.70608e-14	2.34348e-11	37	5	131630995	R	SLC22A4	NM_003059	Body	chr5:131629230-131630797	S_Shore			NA	5:131630969-131631082	Promoter_Associated	NA
cg04484334	1.20062	7.31751e-07	0.00023079	1.41862	1.40638e-09	7.67159e-08	37	3	133174674	R	BFSP2	NM_003571	Body					NA			NA
cg04499701	-2.59106	1.39684e-06	0.000378747	-3.57135	2.59853e-11	2.65188e-09	37	11	111312453	R							DMR	NA			NA
cg04505972	-2.67379	3.75816e-08	2.26715e-05	-3.21309	1.39251e-11	1.58491e-09	37	2	173508040	R								TRUE			NA
cg04508648	-1.19887	7.4333e-05	0.00719297	-0.906426	0.00102197	0.00861402	37	16	86852775	R								NA	16:86851925-86853080	Unclassified_Cell_type_specific	NA
cg04519622	-2.15599	2.11084e-05	0.00286554	-3.43271	2.5648e-11	2.62666e-09	37	13	82651186	F								TRUE			NA
cg04522866	-0.943362	9.08355e-05	0.00827778	-1.03412	5.46961e-06	9.56282e-05	37	3	46586857	R	LRRC2;LRRC2	NM_024750;NM_024512	Body;Body					TRUE			NA
cg04544196	-1.69181	1.20036e-05	0.00188347	-1.19881	0.000604279	0.00552949	37	8	52807648	F	PCMTD1	NM_052937	5'UTR	chr8:52811167-52812312	N_Shelf			NA			NA
cg04545963	-2.02071	1.30466e-06	0.000359005	-3.23262	8.66371e-14	2.33677e-11	37	14	35872393	F	NFKBIA	NM_020529	Body	chr14:35873047-35873990	N_Shore		RDMR	NA			NA
cg04546573	-2.19757	3.142e-05	0.00383035	-4.11017	1.56458e-13	3.7821e-11	37	2	189198567	R	GULP1	NM_016315	5'UTR					TRUE			NA
cg04555379	0.900005	3.56444e-06	0.00075472	0.894448	8.51351e-07	1.90457e-05	37	7	1902093	R	MAD1L1;MAD1L1;MAD1L1	NM_003550;NM_001013837;NM_001013836	Body;Body;Body	chr7:1902762-1903059	N_Shore			NA			NA
cg04560093	-3.2025	2.04544e-05	0.0028076	-5.14896	1.71188e-11	1.88018e-09	37	8	142217405	F				chr8:142219197-142219445	N_Shore			NA			NA
cg04571189	-1.5453	2.47113e-05	0.00323929	-1.56185	5.29155e-06	9.29054e-05	37	2	10638072	R								NA	2:10638029-10638365	Unclassified_Cell_type_specific	TRUE
cg04593859	-2.09542	2.43108e-06	0.000563939	-3.57309	2.18542e-14	7.55274e-12	37	17	80526279	F	FOXK2	NM_004514	Body					TRUE			NA
cg04597532	-1.77827	8.78832e-05	0.00808774	-2.52979	1.32494e-08	5.25497e-07	37	5	138897363	R				chr5:138897460-138897975	N_Shore			TRUE	5:138897173-138898289	Promoter_Associated	NA
cg04603976	-1.64418	1.31115e-05	0.0020095	-1.33281	0.000111893	0.00130619	37	19	4052706	F	ZBTB7A	NM_015898	Body	chr19:4053879-4055289	N_Shore			TRUE	19:4052650-4053283	NonGene_Associated	TRUE
cg04608356	-1.22934	4.17232e-05	0.0047198	-1.41215	7.50908e-07	1.71113e-05	37	1	27668433	R	SYTL1	NM_032872	TSS200					TRUE	1:27667789-27669342	Promoter_Associated	TRUE
cg04614155	1.10135	1.61647e-07	7.13425e-05	0.91792	1.72174e-06	3.5033e-05	37	15	42209202	R	EHD4	NM_139265	Body	chr15:42211419-42211701	N_Shelf			NA			NA
cg04622541	-1.71579	2.35566e-08	1.56969e-05	-1.76466	1.25205e-09	6.94582e-08	37	5	179159255	F	MAML1	NM_014757	TSS1500	chr5:179159467-179160534	N_Shore			NA	5:179159216-179160490	Promoter_Associated	NA
cg04622795	-1.74658	8.38269e-09	6.79621e-06	-1.74327	9.78559e-10	5.64282e-08	37	2	73158609	F	EMX1	NM_004097	Body					TRUE			TRUE
cg04625338	-2.49994	7.43843e-09	6.19759e-06	-2.24929	1.68616e-08	6.47169e-07	37	7	55141971	R	EGFR;EGFR;EGFR;EGFR	NM_201283;NM_201284;NM_201282;NM_005228	Body;Body;Body;Body					TRUE	7:55141700-55142251	Unclassified	TRUE
cg04632069	-2.36171	4.46458e-05	0.00496773	-3.19729	1.52773e-08	5.944e-07	37	5	141695773	F	SPRY4;SPRY4	NM_030964;NM_001127496	Body;5'UTR					NA	5:141695400-141696194	Unclassified_Cell_type_specific	TRUE
cg04635277	0.960734	7.19396e-06	0.00127277	0.798234	4.68581e-05	0.000617252	37	10	114925750	R	TCF7L2;TCF7L2;TCF7L2;TCF7L2;TCF7L2;TCF7L2	NM_001146283;NM_001146286;NM_001146274;NM_001146284;NM_001146285;NM_030756	3'UTR;3'UTR;3'UTR;3'UTR;3'UTR;3'UTR	chr10:114925522-114925751	Island			NA			NA
cg04640834	-3.12391	7.74996e-08	3.98043e-05	-3.58889	1.67689e-10	1.27917e-08	37	12	49261012	R	RND1	NM_014470	TSS1500					NA			NA
cg04655699	-1.05968	1.23689e-05	0.00191937	-1.47899	6.9342e-10	4.1999e-08	37	6	30512550	R	GNL1	NM_005275	3'UTR					NA	6:30511758-30513496	Promoter_Associated	TRUE
cg04656451	-2.16706	7.38902e-05	0.00716763	-5.25917	1.90934e-17	2.66828e-14	37	20	5626258	R							DMR	NA	20:5626094-5626582	Unclassified	NA
cg04657461	-0.834436	3.08067e-05	0.00377383	-0.915147	1.35183e-06	2.84416e-05	37	16	67877060	R	CENPT;THAP11	NM_025082;NM_020457	5'UTR;1stExon	chr16:67875717-67876740	S_Shore			NA	16:67876854-67877601	Promoter_Associated	NA
cg04663842	-1.41663	1.23522e-05	0.00191823	-1.83216	6.51422e-09	2.85802e-07	37	7	73242001	F				chr7:73245434-73246045	N_Shelf			NA	7:73241801-73242114	Unclassified_Cell_type_specific	NA
cg04665930	-1.5614	3.04119e-11	7.65562e-08	-1.81335	4.9604e-15	2.25264e-12	37	19	617432	F	POLRMT	NM_005035	Body	chr19:615691-623505	Island			NA			NA
cg04681525	-1.15472	5.02242e-05	0.00541147	-1.02979	9.03801e-05	0.00108656	37	9	132145577	R				chr9:132145576-132146328	Island			TRUE	9:132145334-132146735	Promoter_Associated	NA
cg04685253	-1.80731	3.80375e-06	0.000792229	-1.25732	0.000357121	0.00353862	37	19	50117948	F	PRR12	NM_020719	Body	chr19:50119223-50119476	N_Shore			NA	19:50117590-50118239	Gene_Associated_Cell_type_specific	TRUE
cg04697635	-1.83708	2.99517e-05	0.00370246	-1.46155	0.00028035	0.00288009	37	5	80181030	F								TRUE			NA
cg04713108	-1.74139	2.05508e-05	0.00281799	-1.86689	1.30901e-06	2.76519e-05	37	5	44807541	R	MRPS30	NM_016640	TSS1500	chr5:44809047-44809692	N_Shore			NA			NA
cg04718492	-2.59177	2.23314e-05	0.00299962	-4.00011	8.25288e-11	7.01304e-09	37	1	117753741	R	VTCN1	NM_024626	TSS200					NA			NA
cg04740205	-2.18672	4.59832e-06	0.000915632	-2.53895	2.84697e-08	1.013e-06	37	11	82871065	F	PCF11	NM_015885	Body	chr11:82867960-82868560	S_Shelf		RDMR	NA			NA
cg04741118	-1.27351	0.000100444	0.00891629	-2.52691	2.96475e-13	6.45164e-11	37	12	96720813	F	CDK17;CDK17	NM_001170464;NM_002595	Body;Body					TRUE	12:96720805-96720862	Unclassified_Cell_type_specific	NA
cg04741211	-1.30509	2.31236e-05	0.00307569	-1.46309	5.80324e-07	1.371e-05	37	2	42399049	F	EML4;EML4	NM_001145076;NM_019063	Body;Body	chr2:42396301-42396933	S_Shelf			NA	2:42399010-42399148	Promoter_Associated_Cell_type_specific	NA
cg04742550	-1.54289	7.94416e-05	0.00754462	-1.79953	1.32485e-06	2.79502e-05	37	16	31366429	R	ITGAX	NM_000887	TSS200					NA	16:31366140-31366570	Unclassified	TRUE
cg04746914	0.929775	6.06054e-05	0.00620049	1.62002	1.07685e-11	1.27325e-09	37	3	45797767	R	SLC6A20;SLC6A20	NM_022405;NM_020208	3'UTR;3'UTR					NA			NA
cg04761746	-2.88061	4.1718e-10	6.14179e-07	-3.45337	3.72046e-14	1.16619e-11	37	4	141177756	F	SCOC	NM_032547	TSS1500	chr4:141173834-141174567	S_Shelf			NA			TRUE
cg04783450	-1.34954	4.4502e-05	0.00495579	-1.24313	4.91823e-05	0.00064338	37	6	42068088	R				chr6:42072032-42072701	N_Shelf			TRUE			TRUE
cg04786142	-4.16706	8.89108e-11	1.7516e-07	-5.35189	2.33986e-16	1.95428e-13	37	1	234908381	F							DMR	NA	1:234907976-234908830	Promoter_Associated	TRUE
cg04799210	1.29895	1.4012e-06	0.000379677	1.39095	4.97883e-08	1.64404e-06	37	4	1994761	R	WHSC2	NM_005663	Body	chr4:1994662-1994872	Island			NA			NA
cg04814352	-2.38655	1.12876e-06	0.000320775	-2.9532	6.36257e-10	3.9053e-08	37	13	97909916	R	MBNL2;MBNL2	NM_144778;NM_207304	5'UTR;5'UTR					TRUE	13:97909838-97910387	Promoter_Associated_Cell_type_specific	NA
cg04820773	-1.79024	4.93601e-07	0.000170298	-1.47988	5.26724e-06	9.25344e-05	37	17	17349669	R								TRUE			TRUE
cg04821520	-3.67004	8.65954e-11	1.71427e-07	-4.38167	5.72133e-15	2.52849e-12	37	11	37525709	R								TRUE			NA
cg04830629	-2.37418	3.05832e-07	0.000119121	-3.21579	4.13564e-12	5.75412e-10	37	12	71558336	R							RDMR	NA			NA
cg04839835	1.63669	3.91317e-06	0.000809232	2.73728	1.28949e-13	3.22612e-11	37	1	159881334	R								NA	1:159881130-159881338	Promoter_Associated	NA
cg04849985	-1.82969	7.08312e-07	0.000224963	-2.86626	6.38967e-14	1.81332e-11	37	1	68215783	F	GNG12	NM_018841	5'UTR					TRUE			NA
cg04853995	-2.88424	1.55159e-08	1.10426e-05	-3.80889	1.12581e-13	2.89293e-11	37	12	112550460	F				chr12:112546147-112546706	S_Shelf			NA	12:112550268-112550532	Unclassified_Cell_type_specific	NA
cg04867652	-1.53858	2.04942e-08	1.38601e-05	-1.96847	5.88881e-13	1.14247e-10	37	17	75178514	F	SEC14L1;SEC14L1;SEC14L1;SEC14L1	NM_001143999;NM_003003;NM_001143998;NM_001039573	Body;Body;Body;Body					TRUE	17:75178401-75178732	Unclassified_Cell_type_specific	NA
cg04872947	-1.64764	7.72063e-09	6.34763e-06	-1.45323	2.96098e-08	1.04827e-06	37	1	17846815	R						low-CpG:17719274-17719415		NA			NA
cg04873169	-1.31714	3.06401e-05	0.00376587	-1.12415	0.000109317	0.00127985	37	22	47021767	F	GRAMD4	NM_015124	TSS1500	chr22:47022457-47022659	N_Shore			NA			NA
cg04875062	1.06518	2.6479e-06	0.000602244	1.21639	2.09819e-08	7.80986e-07	37	1	17305562	R	MFAP2;MFAP2;MFAP2;MFAP2	NM_001135248;NM_017459;NM_001135247;NM_002403	5'UTR;5'UTR;5'UTR;5'UTR	chr1:17306551-17307363	N_Shore			TRUE	1:17305351-17305574	Unclassified_Cell_type_specific	NA
cg04883026	-1.63694	2.98945e-09	3.04017e-06	-1.61395	4.65979e-10	3.00868e-08	37	11	66487938	R	SPTBN2	NM_006946	Body					TRUE	11:66487805-66487948	Unclassified_Cell_type_specific	TRUE
cg04896437	-1.38622	3.52727e-05	0.00417907	-1.49926	2.13983e-06	4.23218e-05	37	1	202076492	R								TRUE			NA
cg04898039	-1.37304	3.5209e-05	0.00417394	-0.987019	0.00105054	0.00881513	37	7	2151184	F	MAD1L1;MAD1L1;MAD1L1	NM_003550;NM_001013837;NM_001013836	Body;Body;Body	chr7:2154677-2155252	N_Shelf			NA			NA
cg04899273	-2.34464	4.23945e-06	0.000860561	-3.36185	4.45475e-11	4.17145e-09	37	10	96443195	R	CYP2C18;CYP2C18	NM_000772;NM_001128925	TSS200;TSS200					NA			NA
cg04903916	-0.995687	2.27976e-06	0.000538331	-1.02977	2.08526e-07	5.65372e-06	37	6	33638413	F	ITPR3	NM_002224	Body					NA			NA
cg04914221	-2.4659	1.49999e-05	0.00222356	-2.21679	2.53334e-05	0.000362175	37	15	63116514	F	TLN2	NM_015059	Body					TRUE			TRUE
cg04921646	-1.80163	8.21229e-05	0.00772591	-1.68553	7.15895e-05	0.000888504	37	1	2851502	R				chr1:2850665-2850873	S_Shore			NA			NA
cg04923845	-2.05586	6.6829e-06	0.00121021	-2.19826	3.47774e-07	8.80344e-06	37	10	114575681	R	VTI1A	NM_145206	3'UTR					NA			TRUE
cg04929165	-1.81967	2.34122e-05	0.00310087	-2.7968	1.03975e-10	8.51775e-09	37	1	186807235	F	PLA2G4A	NM_024420	5'UTR					NA			NA
cg04933530	-2.04086	9.8476e-07	0.000287878	-2.88451	5.96564e-12	7.76264e-10	37	14	77419754	R				chr14:77422842-77423094	N_Shelf			NA	14:77419648-77420325	Unclassified_Cell_type_specific	TRUE
cg04940329	-2.45796	8.25706e-08	4.16741e-05	-2.83322	1.63536e-10	1.25241e-08	37	17	39093054	R	KRT23	NM_015515	5'UTR					TRUE			NA
cg04951638	-1.66025	1.72645e-05	0.0024695	-1.42362	6.13984e-05	0.000778319	37	17	78593781	R	RPTOR;RPTOR	NM_001163034;NM_020761	Body;Body					TRUE			TRUE
cg04958703	-1.8124	9.41549e-06	0.00156658	-1.94702	4.76983e-07	1.15707e-05	37	17	4844722	F	SLC25A11;RNF167;SLC25A11;SLC25A11	NM_001165418;NM_015528;NM_001165417;NM_003562	TSS1500;Body;TSS1500;TSS1500	chr17:4842858-4843636	S_Shore			NA			NA
cg04977856	-1.8986	8.13079e-05	0.00767184	-2.25305	9.48596e-07	2.09013e-05	37	14	89886941	F	FOXN3	NM_001085471	5'UTR	chr14:89882421-89884278	S_Shelf			NA			NA
cg04983349	-3.01061	3.2528e-08	2.03589e-05	-3.41834	8.03689e-11	6.858e-09	37	6	80381447	R	SH3BGRL2	NM_031469	Body					TRUE	6:80381439-80381600	Unclassified_Cell_type_specific	NA
cg04987122	-2.89135	1.53209e-06	0.000404659	-2.27556	3.16301e-05	0.00043938	37	16	2213440	R	TRAF7	NM_032271	5'UTR	chr16:2214222-2215518	N_Shore			NA	16:2213245-2213465	Gene_Associated	TRUE
cg04994456	-1.73496	9.66673e-05	0.00865072	-1.48816	0.000281589	0.00289055	37	1	20141662	R	RNF186;RNF186	NM_019062;NM_019062	5'UTR;1stExon					NA			NA
cg05012239	-1.97568	4.90375e-05	0.0053143	-2.12441	3.6288e-06	6.69095e-05	37	3	195447691	R	MUC20	NM_152673	TSS200					NA			NA
cg05026014	-1.61693	8.30797e-06	0.00142834	-2.51958	8.51504e-12	1.04372e-09	37	4	1749153	R								NA	4:1748903-1749313	Unclassified	NA
cg05026393	-1.46265	2.92003e-08	1.87074e-05	-1.77657	6.73158e-12	8.55992e-10	37	8	125672795	R	MTSS1	NM_014751	Body					TRUE	8:125672584-125672899	Unclassified_Cell_type_specific	NA
cg05032059	-1.90726	3.28571e-05	0.00395026	-3.25017	5.95493e-12	7.75365e-10	37	2	19774488	R								TRUE			NA
cg05036173	2.33621	3.9228e-05	0.00452575	3.05591	3.06622e-08	1.08037e-06	37	2	108994528	R	SULT1C4;SULT1C4	NM_006588;NM_006588	5'UTR;1stExon					TRUE			NA
cg05045528	-0.993989	3.81241e-05	0.00442939	-0.926113	3.51481e-05	0.000481541	37	9	132815702	R	GPR107;GPR107;GPR107	NM_020960;NM_001136557;NM_001136558	TSS1500;TSS1500;TSS1500	chr9:132815766-132816615	N_Shore			NA	9:132815702-132817026	Promoter_Associated	NA
cg05054998	1.35232	9.11885e-05	0.00829698	1.63792	7.20644e-07	1.65056e-05	37	21	46378625	F	C21orf70	NM_058190	Body	chr21:46378278-46378645	Island			TRUE			TRUE
cg05056300	-1.68447	8.60169e-06	0.00146278	-1.67586	2.20626e-06	4.3448e-05	37	12	76257371	F								TRUE			NA
cg05059480	-1.50326	2.47168e-05	0.00323929	-1.27073	0.000104099	0.00122754	37	15	40633202	R	C15orf52	NM_207380	TSS200					NA			NA
cg05063895	-1.08977	5.50239e-07	0.000184987	-1.12305	4.38067e-08	1.4697e-06	37	16	2073518	R				chr16:2077042-2077470	N_Shelf			NA	16:2072583-2074348	Unclassified	NA
cg05067156	-1.12002	2.35794e-06	0.000551679	-1.4343	6.62749e-10	4.04027e-08	37	16	88591451	R	ZFPM1	NM_153813	Body	chr16:88590204-88590410	S_Shore			NA	16:88590966-88591489	Unclassified_Cell_type_specific	NA
cg05068848	-2.57736	2.84527e-06	0.000637535	-2.05716	4.11975e-05	0.000552666	37	4	23335733	R								TRUE	4:23335521-23336159	Unclassified_Cell_type_specific	NA
cg05083202	0.500341	2.40466e-06	0.00055972	0.585692	9.41717e-09	3.92033e-07	37	21	40146149	R	NCRNA00114	NR_027065	TSS1500					TRUE			NA
cg05085169	0.845372	1.12067e-07	5.30178e-05	0.687142	2.10769e-06	4.17692e-05	37	20	61443751	F	OGFR	NM_007346	Body	chr20:61443567-61443820	Island			NA			NA
cg05087455	-2.03223	1.16199e-05	0.00183916	-2.50365	2.23446e-08	8.23965e-07	37	2	7171869	R	RNF144A	NM_014746	Body	chr2:7172296-7172512	N_Shore			NA	2:7171709-7172166	Unclassified_Cell_type_specific	TRUE
cg05091653	-1.58737	3.06246e-05	0.0037651	-2.20864	3.70474e-09	1.76003e-07	37	2	231281474	R	SP100;SP100	NM_003113;NM_001080391	Body;Body					NA	2:231281455-231281602	Promoter_Associated_Cell_type_specific	NA
cg05097306	1.3104	5.77251e-06	0.00108432	1.08114	4.34709e-05	0.00057913	37	10	45374683	R								TRUE	10:45374031-45374969	Promoter_Associated_Cell_type_specific	TRUE
cg05099464	-3.65312	1.02162e-12	5.21962e-09	-4.10468	3.38659e-16	2.58626e-13	37	11	120302922	F	ARHGEF12	NM_015313	Body					TRUE			TRUE
cg05101437	-3.20311	1.92898e-16	7.15133e-12	-2.95287	2.48764e-16	2.0331e-13	37	7	92262970	F	CDK6;CDK6	NM_001259;NM_001145306	Body;Body					TRUE			NA
cg05103992	-0.707963	4.26017e-05	0.00479921	-0.910079	5.48131e-08	1.78296e-06	37	6	159290440	F				chr6:159290673-159291195	N_Shore			TRUE	6:159290051-159291628	Unclassified	NA
cg05104283	1.18791	1.10866e-08	8.4193e-06	1.0303	6.37228e-08	2.03071e-06	37	17	75463860	R	SEPT9;SEPT9;SEPT9;SEPT9;SEPT9;SEPT9	NM_001113492;NM_001113496;NM_001113493;NM_001113491;NM_006640;NM_001113494	Body;5'UTR;Body;Body;Body;Body					TRUE			NA
cg05119754	1.70047	1.54096e-05	0.00226945	1.36869	0.000141074	0.00159302	37	15	69853722	F	LOC145837	NR_026979	TSS1500					TRUE			NA
cg05125838	-1.28584	1.09052e-07	5.21327e-05	-1.20122	9.02607e-08	2.73813e-06	37	3	48601585	R	UCN2;COL7A1	NM_033199;NM_000094	TSS1500;3'UTR					NA			TRUE
cg05130485	-2.08572	5.64748e-06	0.00106821	-2.45574	2.61896e-08	9.44149e-07	37	2	202098257	R	CASP8;CASP8;CASP8;CASP8;CASP8;CASP8;CASP8;CASP8	NM_033355;NM_033358;NM_001080124;NM_033355;NM_033358;NM_001228;NM_001080124;NM_001228	5'UTR;5'UTR;1stExon;1stExon;1stExon;5'UTR;5'UTR;1stExon					TRUE	2:202097951-202098461	Promoter_Associated	NA
cg05147525	-1.02315	2.1388e-07	8.95495e-05	-1.05144	1.59173e-08	6.15858e-07	37	12	6717762	R	CHD4	NM_001273	TSS1500	chr12:6715500-6715829	S_Shore		RDMR	NA			NA
cg05154546	1.92785	1.95071e-05	0.00270764	1.81355	1.515e-05	0.000231776	37	4	3373555	F	RGS12;RGS12;RGS12	NM_198229;NM_198227;NM_002926	Body;Body;Body	chr4:3374733-3374998	N_Shore			NA			NA
cg05158024	1.45119	1.08843e-05	0.00174682	1.40177	5.08861e-06	8.98258e-05	37	16	85191946	R								TRUE	16:85191328-85191984	Promoter_Associated_Cell_type_specific	NA
cg05191655	-2.04242	1.52068e-09	1.7769e-06	-1.78682	8.08042e-09	3.43862e-07	37	4	38162793	R								TRUE	4:38162620-38162910	Unclassified	TRUE
cg05194316	1.70695	3.99999e-05	0.00459117	2.13441	9.90134e-08	2.96919e-06	37	13	98869706	F	FARP1;FARP1	NM_005766;NM_001001715	Body;Body					NA			NA
cg05194636	0.995601	2.38403e-06	0.000556826	1.57087	4.76712e-13	9.63832e-11	37	11	12098045	F								TRUE			TRUE
cg05202389	1.12616	5.30886e-05	0.00562769	2.45861	9.22427e-16	5.78722e-13	37	13	103254958	R	TPP2	NM_003291	Body					TRUE			NA
cg05204097	0.870303	0.000106196	0.00927743	1.00964	2.2231e-06	4.37311e-05	37	16	979553	F	LMF1	NM_022773	Body	chr16:979422-979663	Island			NA			NA
cg05208400	-3.29318	3.79621e-09	3.64261e-06	-3.82533	2.27257e-12	3.48539e-10	37	2	227538347	R								TRUE			NA
cg05230392	-1.59422	1.93103e-05	0.00268722	-1.16019	0.000608612	0.00556302	37	17	55976522	F	CUEDC1	NM_017949	5'UTR					TRUE			TRUE
cg05232694	-1.34237	9.9007e-07	0.000288809	-1.92075	3.84964e-12	5.41344e-10	37	20	48809539	R				chr20:48806598-48809022	S_Shore		RDMR	NA			NA
cg05240610	-1.07684	2.85215e-05	0.00358213	-1.1846	1.14839e-06	2.46586e-05	37	2	10365538	R								TRUE			NA
cg05251814	-2.01363	6.63851e-05	0.00662032	-2.14447	6.35199e-06	0.000108999	37	16	585386	F	SOLH	NM_005632	5'UTR	chr16:587567-588172	N_Shelf			NA	16:584516-585530	Gene_Associated_Cell_type_specific	NA
cg05259836	-1.49106	4.84796e-05	0.00526503	-2.06854	9.03864e-09	3.79023e-07	37	6	74290516	F							DMR	NA	6:74290005-74290559	Unclassified	TRUE
cg05277054	-2.46994	1.88417e-06	0.000470528	-3.33098	8.87592e-11	7.44934e-09	37	7	28725646	F	CREB5;CREB5;CREB5;CREB5	NM_001011666;NM_004904;NM_182899;NM_182898	TSS200;Body;Body;Body					TRUE	7:28725525-28725743	Unclassified_Cell_type_specific	TRUE
cg05279413	-1.14762	3.35911e-07	0.000128504	-0.861662	2.17939e-05	0.000317995	37	7	1572327	F	MAFK	NM_002360	5'UTR	chr7:1570406-1571136	S_Shore		RDMR	NA	7:1572242-1572607	Promoter_Associated	NA
cg05287409	-1.57668	2.39921e-07	9.82338e-05	-2.20301	8.77363e-13	1.59454e-10	37	7	99690806	F	MCM7;MCM7	NM_005916;NM_182776	Body;Body	chr7:99686452-99686839	S_Shelf			NA			NA
cg05288172	-1.84752	1.96292e-05	0.00272089	-1.55932	8.71956e-05	0.00105344	37	8	103751006	R				chr8:103750881-103751088	Island			NA	8:103750815-103751112	Unclassified_Cell_type_specific	TRUE
cg05295023	-1.32512	6.88277e-07	0.000219454	-1.22583	7.20802e-07	1.65073e-05	37	11	67079729	R	SSH3	NM_017857	3'UTR					NA	11:67078823-67079818	Unclassified_Cell_type_specific	NA
cg05305099	-1.98347	4.1527e-06	0.000847168	-2.78437	8.75403e-11	7.36675e-09	37	16	57657514	R	GPR56;GPR56	NM_001145770;NM_005682	5'UTR;5'UTR					TRUE			TRUE
cg05307803	-0.704536	4.52886e-05	0.00501463	-0.812379	7.73763e-07	1.75575e-05	37	16	86774865	F								TRUE			TRUE
cg05309989	-1.82232	1.21669e-05	0.00189912	-1.33746	0.000399308	0.00389261	37	14	50527872	R								TRUE	14:50527847-50528046	Unclassified_Cell_type_specific	TRUE
cg05315321	-0.916816	1.25816e-05	0.00194396	-0.859911	1.0208e-05	0.000164456	37	14	68844276	R	RAD51L1;RAD51L1;RAD51L1	NM_133509;NM_002877;NM_133510	Body;Body;Body					TRUE			NA
cg05318454	-1.51818	2.05715e-07	8.6844e-05	-1.21058	5.06264e-06	8.94512e-05	37	19	46117805	R	EML2	NM_012155	Body	chr19:46119454-46119815	N_Shore			TRUE	19:46117705-46117847	Gene_Associated_Cell_type_specific	TRUE
cg05322837	-1.15498	3.1038e-06	0.000679776	-1.00829	9.67501e-06	0.000157088	37	17	70147783	F								TRUE			TRUE
cg05324618	0.484469	7.27063e-05	0.00709492	0.54443	2.51733e-06	4.87546e-05	37	14	105917199	R	MTA1	NM_004689	Body	chr14:105915521-105915931	S_Shore			NA			NA
cg05326378	-1.37464	4.73389e-05	0.00518345	-1.124	0.000284394	0.00291473	37	15	71081264	R								TRUE			NA
cg05329317	-2.24699	4.2946e-06	0.000868728	-2.92845	9.81926e-10	5.65904e-08	37	16	30126595	F	MAPK3;MAPK3;MAPK3	NM_001109891;NM_002746;NM_001040056	3'UTR;3'UTR;3'UTR					NA			NA
cg05334190	-2.50558	2.22166e-10	3.69796e-07	-1.98721	2.15247e-08	7.98351e-07	37	13	44880206	R								TRUE			NA
cg05336982	-3.00322	5.32663e-12	1.8566e-08	-4.12316	1.8494e-19	6.4461e-16	37	16	69564735	F							DMR	TRUE	16:69564532-69564808	Promoter_Associated	TRUE
cg05341781	0.925187	9.79944e-05	0.00874836	1.21435	1.26861e-07	3.66938e-06	37	1	164723567	F	PBX1	NM_002585	Body					TRUE			NA
cg05343811	-3.86779	5.07576e-07	0.000173505	-5.22744	1.00132e-11	1.19468e-09	37	14	75590896	R	NEK9	NM_033116	Body	chr14:75593293-75594011	N_Shelf			NA			TRUE
cg05349059	-1.45994	6.38847e-08	3.42795e-05	-1.82455	7.23847e-12	9.0995e-10	37	6	134694753	R								TRUE			NA
cg05355436	-3.98464	6.60889e-12	2.17349e-08	-3.46913	5.8876e-11	5.28387e-09	37	10	63520873	R	C10orf107	NM_173554	Body					TRUE			NA
cg05363574	-1.59437	1.06813e-05	0.00171966	-2.09903	3.10897e-09	1.5153e-07	37	2	74919244	R								TRUE			NA
cg05366058	-1.53258	4.45012e-05	0.00495579	-1.55727	9.38615e-06	0.000152998	37	8	25313630	R	KCTD9	NM_017634	Body	chr8:25315286-25317028	N_Shore		RDMR	NA			NA
cg05366139	-2.44767	5.90774e-08	3.23382e-05	-2.80368	1.29741e-10	1.02716e-08	37	1	200045613	F	NR5A2;NR5A2	NM_205860;NM_003822	Body;Body					TRUE			NA
cg05368724	-1.40403	1.48496e-05	0.0022077	-2.2736	6.86403e-12	8.68501e-10	37	2	97561669	R	FAM178B;FAM178B	NM_016490;NM_001122646	5'UTR;Body					NA	2:97561442-97561851	Unclassified_Cell_type_specific	TRUE
cg05379350	-1.4749	1.9268e-05	0.00268267	-1.68681	2.89508e-07	7.51081e-06	37	17	27917157	R	GIT1;GIT1	NM_014030;NM_001085454	TSS1500;TSS1500	chr17:27918161-27918398	N_Shore			NA			NA
cg05398095	-2.56889	1.57015e-05	0.0023008	-2.59981	3.07962e-06	5.81346e-05	37	1	207224740	F	YOD1	NM_018566	TSS1500	chr1:207226281-207226842	N_Shore			NA	1:207223188-207225061	Promoter_Associated	TRUE
cg05398905	-1.56094	2.0093e-05	0.00277008	-1.70594	8.44541e-07	1.89141e-05	37	17	80847209	F	TBCD	NM_005993	Body					TRUE			TRUE
cg05405389	-2.51907	2.91496e-07	0.000114632	-2.64892	1.22324e-08	4.90166e-07	37	11	84386472	R	DLG2;DLG2	NM_001142699;NM_001364	Body;Body					TRUE			NA
cg05415729	-3.45653	5.03833e-08	2.86963e-05	-4.67069	2.69398e-13	5.95455e-11	37	2	114045972	R	LOC440839	NR_029399	Body	chr2:114048828-114049055	N_Shelf			NA			NA
cg05427381	-2.74944	1.90639e-11	5.23424e-08	-2.64373	5.18708e-12	6.90602e-10	37	11	62309707	F	AHNAK;AHNAK	NM_024060;NM_001620	5'UTR;5'UTR	chr11:62313282-62314314	N_Shelf		RDMR	NA			NA
cg05427639	-1.92034	4.58814e-07	0.000161298	-2.05662	1.27804e-08	5.09423e-07	37	7	33080496	R	NT5C3;NT5C3;NT5C3;NT5C3;NT5C3;NT5C3	NM_001166118;NM_016489;NM_016489;NR_029372;NM_001166118;NM_001002010	1stExon;1stExon;5'UTR;Body;5'UTR;Body					NA	7:33080315-33080858	Promoter_Associated	NA
cg05429895	-1.48637	7.69683e-05	0.00737499	-2.78601	1.32404e-12	2.22661e-10	37	9	120466640	R	TLR4;TLR4;TLR4;TLR4	NR_024169;NR_024168;NM_138554;NM_138554	Body;Body;1stExon;5'UTR			low-CpG:119506274-119506535		TRUE			NA
cg05442717	0.93911	0.000116578	0.00993335	1.13639	1.05922e-06	2.29726e-05	37	17	38511950	R	RARA;RARA;RARA;RARA	NM_001145301;NM_000964;NM_001024809;NM_001145302	Body;Body;Body;Body					NA	17:38510740-38512198	Gene_Associated	NA
cg05463027	-1.37195	5.96457e-07	0.000197433	-1.52632	6.17195e-09	2.72899e-07	37	6	17988748	F	KIF13A;KIF13A;KIF13A;KIF13A	NM_001105567;NM_001105566;NM_001105568;NM_022113	TSS1500;TSS1500;TSS1500;TSS1500	chr6:17987415-17988405	S_Shore			NA			NA
cg05471495	-2.63801	4.63481e-06	0.000919753	-1.98813	0.000141275	0.00159467	37	2	101369330	R								TRUE			TRUE
cg05471509	1.6017	2.27641e-06	0.000538295	2.11581	2.36204e-10	1.69855e-08	37	13	114109420	R								NA			NA
cg05476182	-1.6563	1.37157e-09	1.62125e-06	-1.4428	8.27471e-09	3.50812e-07	37	5	133913122	R	PHF15	NM_015288	Body					TRUE	5:133913003-133914613	Unclassified	NA
cg05499499	-1.22412	0.000117779	0.00999599	-1.16196	8.3425e-05	0.00101328	37	2	220263615	R								TRUE			NA
cg05501617	-2.02669	9.44114e-06	0.00156947	-1.95354	4.5563e-06	8.15992e-05	37	4	185339075	R	IRF2	NM_002199	Body					TRUE			TRUE
cg05501742	-0.945598	9.03263e-05	0.00824797	-0.819428	0.000231804	0.00244569	37	16	126892	R	MPG;MPG;MPG	NM_001015054;NM_002434;NM_001015052	TSS200;TSS1500;TSS1500	chr16:127448-128631	N_Shore			TRUE	16:126721-126953	Unclassified	NA
cg05508862	-1.88837	2.9647e-11	7.55636e-08	-1.55638	1.30947e-09	7.21629e-08	37	17	18885437	R	SLC5A10;FAM83G;SLC5A10	NM_001042450;NM_001039999;NM_152351	Body;Body;Body					TRUE	17:18885373-18885614	Unclassified_Cell_type_specific	TRUE
cg05521150	-3.03808	2.05185e-09	2.26762e-06	-4.36528	1.34673e-16	1.27425e-13	37	4	11550611	F								TRUE			NA
cg05521767	-0.964806	2.19449e-06	0.000525807	-1.49761	7.63676e-13	1.41495e-10	37	11	75230135	F	GDPD5	NM_030792	5'UTR					TRUE			NA
cg05529886	-1.89533	2.18888e-12	9.17317e-09	-1.80747	7.52182e-13	1.39852e-10	37	3	63329604	F	SYNPR	NM_001130003	Body					TRUE			TRUE
cg05548425	-1.75023	8.86908e-05	0.00813462	-1.37439	0.000765285	0.00675672	37	17	1553415	R	RILP	NM_031430	TSS200	chr17:1551730-1553249	S_Shore			NA			NA
cg05563595	1.89519	7.4189e-06	0.00130248	2.25905	2.78043e-08	9.93142e-07	37	6	30140305	R	TRIM15	NM_033229	3'UTR	chr6:30139718-30140263	S_Shore			TRUE			NA
cg05569220	1.55095	1.78996e-09	2.03425e-06	1.39262	4.53049e-09	2.09663e-07	37	17	79138873	R	LOC388428;AATK	NR_027255;NM_001080395	TSS1500;Body	chr17:79139501-79140028	N_Shore			NA			NA
cg05575213	2.17227	7.89623e-11	1.6014e-07	2.00817	8.65968e-11	7.30092e-09	37	6	1621807	F				chr6:1619093-1621094	S_Shore		RDMR	NA			NA
cg05575505	-3.42013	1.53395e-10	2.73166e-07	-3.61902	1.48212e-12	2.4411e-10	37	15	101262162	F								TRUE			TRUE
cg05577434	-0.993082	9.60238e-05	0.00861693	-1.95194	3.80268e-13	8.01007e-11	37	22	25003527	F	GGT1;GGT1;GGT1;GGT1	NM_001032364;NM_001032365;NM_013430;NM_005265	5'UTR;TSS200;5'UTR;5'UTR					NA	22:25003305-25003983	Promoter_Associated_Cell_type_specific	TRUE
cg05578673	-2.08276	4.54347e-05	0.00502671	-3.84345	6.49993e-13	1.2468e-10	37	1	90307339	F	LRRC8D;LRRC8D	NM_018103;NM_001134479	5'UTR;5'UTR	chr1:90308839-90309606	N_Shore			NA			NA
cg05582286	-2.10848	1.07606e-06	0.000307515	-2.26924	3.16656e-08	1.11016e-06	37	11	69218633	F								TRUE			TRUE
cg05583636	-2.02811	7.68634e-06	0.00133954	-1.52267	0.000215093	0.00229376	37	16	25005762	F	ARHGAP17;ARHGAP17	NM_001006634;NM_018054	Body;Body					TRUE			TRUE
cg05601096	-1.7256	2.45623e-05	0.00322492	-2.10468	8.76491e-08	2.66783e-06	37	14	88461031	R	GALC;GALC	NM_000153;NM_001037525	TSS1500;TSS1500	chr14:88459118-88459689	S_Shore			NA			NA
cg05602642	-1.40593	1.32049e-05	0.00202139	-1.35884	6.1807e-06	0.000106436	37	22	47081634	R	CERK	NM_022766	3'UTR	chr22:47081750-47082045	N_Shore			NA	22:47081431-47081814	Unclassified_Cell_type_specific	NA
cg05613116	-1.35785	2.13666e-05	0.00289289	-1.97557	5.0825e-10	3.22929e-08	37	2	27958722	R				chr2:27958207-27958723	Island			TRUE	2:27957816-27959130	Unclassified	TRUE
cg05620046	1.13205	7.79907e-07	0.000240234	1.79839	4.31942e-14	1.32144e-11	37	6	167810343	F								NA			NA
cg05626226	-1.60866	2.05739e-06	0.000501125	-1.66768	1.74877e-07	4.85041e-06	37	4	106515450	R	FLJ20184	NM_017700	Body					NA	4:106515265-106515657	Unclassified_Cell_type_specific	NA
cg05631399	0.865168	5.55216e-05	0.00581158	1.1316	5.42213e-08	1.76695e-06	37	11	66481581	F	SPTBN2	NM_006946	Body					TRUE			NA
cg05632420	1.1709	1.5223e-05	0.00224683	1.0673	2.03503e-05	0.000299536	37	7	130793732	R	MKLN1;FLJ43663	NM_001145354;NR_015431	TSS1500;TSS200	chr7:130794689-130795032	N_Shore			NA			NA
cg05655555	-3.16555	1.41704e-06	0.000382192	-3.73918	3.52446e-09	1.68557e-07	37	19	2054816	F				chr19:2050630-2051566	S_Shelf			NA			NA
cg05656364	-1.40458	1.18343e-06	0.000332375	-1.3487	5.52067e-07	1.31305e-05	37	2	85804732	F	VAMP8;VAMP8	NM_003761;NM_003761	5'UTR;1stExon			low-CpG:85658173-85658249		NA	2:85804552-85805283	Promoter_Associated	TRUE
cg05656374	-2.36349	1.97911e-07	8.39844e-05	-2.27559	7.90197e-08	2.44115e-06	37	21	42733825	R	MX2	NM_002463	TSS200					NA	21:42733352-42734832	Promoter_Associated	TRUE
cg05657111	-1.56505	7.57224e-05	0.00729504	-1.58274	1.87537e-05	0.000279068	37	3	181902114	R								TRUE			NA
cg05659947	-2.86705	7.23074e-06	0.00127816	-3.63189	5.08475e-09	2.31426e-07	37	1	207262190	F	C4BPB;C4BPB;C4BPB;C4BPB;C4BPB	NM_000716;NM_001017364;NM_001017365;NM_001017366;NM_001017367	TSS1500;TSS1500;TSS200;TSS200;TSS1500					NA			NA
cg05663262	1.22771	2.25408e-05	0.0030178	0.847543	0.00121344	0.00995588	37	1	43930279	R								NA			NA
cg05671644	-4.56995	2.34192e-15	6.26236e-11	-3.53234	3.48936e-12	4.97892e-10	37	7	102632303	F	FBXL13;FBXL13	NM_145032;NM_001111038	Body;Body					TRUE			TRUE
cg05673882	-2.66391	2.50476e-05	0.0032676	-2.05399	0.000364139	0.0035995	37	5	74862702	F	POLK	NM_016218	Body					TRUE			NA
cg05673892	-1.73442	4.00955e-05	0.00459688	-2.32104	1.73916e-08	6.64328e-07	37	3	38033934	R	VILL	NM_015873	TSS1500	chr3:38035701-38036000	N_Shore			TRUE			NA
cg05674437	2.04863	5.20383e-07	0.000177437	2.18228	1.72027e-08	6.58394e-07	37	3	196694153	R	PIGZ	NM_025163	5'UTR	chr3:196693765-196694200	Island			NA			NA
cg05686445	0.796831	4.12596e-07	0.000148714	0.973733	2.22095e-10	1.61216e-08	37	7	127636396	R	C7orf54;SND1	NR_027330;NM_014390	TSS1500;Body					TRUE			NA
cg05689413	-1.82395	5.35187e-06	0.00102321	-1.83617	1.01586e-06	2.21653e-05	37	6	41885417	R	MED20	NM_004275	Body	chr6:41888868-41889563	N_Shelf			NA			TRUE
cg05696969	-3.04012	1.6067e-09	1.86672e-06	-4.36107	9.92312e-17	9.94272e-14	37	5	145326228	R	SH3RF2	NM_152550	Body					TRUE	5:145326169-145326282	Unclassified_Cell_type_specific	NA
cg05697539	1.87148	3.29122e-08	2.04912e-05	1.44049	2.37398e-06	4.62948e-05	37	11	63906104	F	MACROD1	NM_014067	Body					NA			NA
cg05701418	-2.63934	4.05636e-07	0.00014704	-2.76309	2.0355e-08	7.61687e-07	37	6	30131361	F	TRIM15;TRIM15	NM_033229;NM_033229	5'UTR;1stExon					TRUE			NA
cg05703211	1.10348	4.16613e-05	0.00471673	1.5227	8.03252e-09	3.42216e-07	37	1	90297591	R	LRRC8D;LRRC8D	NM_018103;NM_001134479	5'UTR;5'UTR					TRUE			NA
cg05711445	-2.72707	3.16098e-13	2.01415e-09	-3.04506	1.12009e-16	1.10067e-13	37	7	139528855	F	TBXAS1;TBXAS1;TBXAS1;TBXAS1;TBXAS1;TBXAS1	NM_030984;NM_001061;NM_001130966;NM_001166253;NM_001166254;NR_029394	TSS200;TSS200;5'UTR;TSS200;5'UTR;TSS200					NA			NA
cg05713971	-1.0362	6.31501e-09	5.42165e-06	-1.07825	1.92784e-10	1.43737e-08	37	16	56965542	R	HERPUD1;HERPUD1;HERPUD1	NM_001010990;NM_014685;NM_001010989	TSS1500;TSS1500;TSS1500	chr16:56965734-56966476	N_Shore			NA	16:56965152-56967142	Promoter_Associated	NA
cg05724492	1.17648	4.18873e-06	0.000853236	1.16314	1.13679e-06	2.44423e-05	37	16	979662	R	LMF1	NM_022773	Body	chr16:979422-979663	Island			NA			NA
cg05729490	-1.8481	2.24561e-07	9.2783e-05	-1.70008	2.68819e-07	7.05122e-06	37	7	27404187	R								TRUE	7:27404126-27404310	Unclassified_Cell_type_specific	NA
cg05750031	1.05742	2.68337e-06	0.000609291	1.14422	8.50507e-08	2.59981e-06	37	6	158029187	F	ZDHHC14;ZDHHC14	NM_153746;NM_024630	Body;Body					NA			NA
cg05752207	-2.10857	5.59019e-05	0.0058439	-2.81407	3.26752e-08	1.14143e-06	37	1	193126041	F	CDC73	NM_024529	Body					TRUE			NA
cg05762612	-1.5031	7.76888e-05	0.00742833	-1.14071	0.00101298	0.0085517	37	18	76260568	F				chr18:76262285-76263098	N_Shore			NA			NA
cg05776704	-0.729393	4.81517e-06	0.000948164	-0.932923	2.05926e-09	1.0626e-07	37	3	149376672	R	WWTR1;WWTR1;WWTR1	NM_001168278;NM_015472;NM_001168280	5'UTR;TSS1500;TSS1500	chr3:149374709-149376300	S_Shore			NA	3:149376669-149376844	Unclassified_Cell_type_specific	NA
cg05780139	-1.32806	7.86676e-05	0.0074963	-1.61058	5.62823e-07	1.33575e-05	37	17	37008512	R	RPL23	NM_000978	Body	chr17:37009471-37010118	N_Shore		RDMR	NA			NA
cg05783998	-1.07781	4.94569e-06	0.000963864	-1.51768	1.06811e-10	8.71684e-09	37	6	74295921	R								TRUE	6:74295112-74296014	Promoter_Associated	NA
cg05790630	-1.81955	7.58412e-05	0.00729959	-1.78079	3.24766e-05	0.000449501	37	3	64963168	R								TRUE			NA
cg05792169	-1.68035	1.19838e-05	0.00188108	-2.1316	1.06319e-08	4.3488e-07	37	15	85874227	F								TRUE	15:85872869-85875195	Promoter_Associated	TRUE
cg05797367	0.72792	0.000108392	0.00940281	0.648194	0.000190333	0.00206472	37	6	31759806	F	VARS	NM_006295	Body	chr6:31763240-31763905	N_Shelf			NA	6:31758726-31760405	Gene_Associated	NA
cg05811904	-1.33981	2.04414e-05	0.00280676	-1.67026	3.83082e-08	1.30807e-06	37	7	137620397	R	CREB3L2	NM_194071	Body				DMR	TRUE	7:137619717-137620434	Promoter_Associated_Cell_type_specific	NA
cg05814312	-1.51528	2.43442e-07	9.91775e-05	-1.37029	4.30119e-07	1.05748e-05	37	10	29760687	R	SVIL;SVIL	NM_021738;NM_003174	Body;Body					TRUE			TRUE
cg05821464	-2.70561	2.43068e-07	9.91241e-05	-3.57836	6.85644e-12	8.6781e-10	37	22	47057502	R	GRAMD4	NM_015124	Body	chr22:47058870-47059114	N_Shore		CDMR	TRUE	22:47057331-47057778	Gene_Associated_Cell_type_specific	TRUE
cg05839741	1.45996	3.63105e-06	0.000766006	1.24597	1.6642e-05	0.000251433	37	6	42695625	F				chr6:42694963-42695631	Island			NA	6:42695456-42695762	Promoter_Associated_Cell_type_specific	NA
cg05844827	-2.14644	1.87447e-07	7.99601e-05	-2.04151	1.00983e-07	3.02071e-06	37	17	55502491	R	MSI2;MSI2	NM_138962;NM_170721	Body;Body					TRUE			NA
cg05849772	-2.38524	5.52032e-05	0.00579015	-2.62198	2.72829e-06	5.22645e-05	37	16	303182	F	ITFG3	NM_032039	5'UTR					NA	16:302696-303406	Unclassified_Cell_type_specific	NA
cg05853772	-2.51497	2.81239e-07	0.00011135	-2.71004	5.94864e-09	2.64314e-07	37	16	8957249	F	CARHSP1;CARHSP1	NM_014316;NM_001042476	5'UTR;5'UTR					TRUE			NA
cg05860566	-2.32203	5.83739e-08	3.21257e-05	-2.62739	1.90297e-10	1.42158e-08	37	16	19017211	F	TMC7;TMC7	NM_001160364;NM_024847	5'UTR;Body					TRUE			TRUE
cg05878073	-2.02111	4.17026e-05	0.00471878	-1.53092	0.000657833	0.00594313	37	14	74766220	F	ABCD4;ABCD4	NR_003256;NM_005050	Body;Body	chr14:74769366-74769815	N_Shelf			NA			NA
cg05881698	-3.89859	6.06531e-09	5.2515e-06	-4.54282	3.71528e-12	5.26079e-10	37	19	5818763	F				chr19:5822284-5822532	N_Shelf			NA			NA
cg05885012	-0.827947	8.60648e-05	0.00797332	-0.642204	0.000859073	0.00744472	37	17	55980673	F	CUEDC1;CUEDC1	NM_017949;NM_017949	5'UTR;1stExon					NA	17:55980593-55980726	Unclassified_Cell_type_specific	TRUE
cg05886546	2.06292	4.46014e-05	0.00496414	1.78795	0.000122509	0.00141161	37	17	40936498	F	WNK4	NM_032387	Body	chr17:40936445-40936668	Island			NA			NA
cg05889541	-1.69183	2.55263e-07	0.000102458	-2.33577	1.52603e-12	2.49925e-10	37	13	103245138	R				chr13:103248813-103249992	N_Shelf			NA	13:103243996-103245231	Promoter_Associated	NA
cg05892484	0.759999	1.45643e-06	0.000388448	0.639869	9.49503e-06	0.000154495	37	7	2143507	F	MAD1L1;MAD1L1;MAD1L1	NM_003550;NM_001013837;NM_001013836	Body;Body;Body					NA	7:2143141-2144622	Unclassified	NA
cg05898618	-3.37654	5.60861e-08	3.11176e-05	-3.40561	5.87604e-09	2.61688e-07	37	11	2555576	F	KCNQ1;KCNQ1	NM_000218;NM_181798	Body;Body	chr11:2555405-2555618	Island			NA			NA
cg05915004	1.26519	9.76151e-05	0.00872114	1.63555	1.81589e-07	5.01237e-06	37	11	15959602	R				chr11:15959855-15960077	N_Shore			TRUE			NA
cg05919461	0.973762	4.21555e-05	0.00475814	1.04313	3.23762e-06	6.06656e-05	37	4	77688155	F	SHROOM3	NM_020859	Body					TRUE			NA
cg05920420	1.21179	7.16845e-06	0.00127037	1.03715	2.89718e-05	0.000406944	37	1	29210117	R				chr1:29213438-29214300	N_Shelf			TRUE	1:29210076-29211267	Promoter_Associated_Cell_type_specific	NA
cg05948372	-2.01371	8.48087e-06	0.0014483	-2.80469	3.85222e-10	2.56985e-08	37	18	19283268	R	ABHD3	NM_138340	Body	chr18:19284165-19285052	N_Shore			NA	18:19283172-19283469	Promoter_Associated	NA
cg05968822	-1.90916	7.39546e-05	0.00717217	-2.795	4.31171e-09	2.01091e-07	37	1	226071684	F	TMEM63A	NM_014698	TSS1500	chr1:226069605-226070898	S_Shore			NA	1:226071613-226071780	Unclassified_Cell_type_specific	NA
cg05975710	-0.941589	1.69735e-07	7.39516e-05	-1.05137	1.12295e-09	6.34801e-08	37	11	73078836	R	ARHGEF17	NM_014786	3'UTR					NA			NA
cg05987698	-1.85722	2.51248e-15	6.26236e-11	-1.91529	1.94355e-17	2.70508e-14	37	3	13520959	F	HDAC11;HDAC11	NM_001136041;NM_024827	TSS1500;TSS1500	chr3:13520912-13521319	Island			NA			NA
cg05988358	-1.97088	8.67889e-13	4.59648e-09	-1.28641	5.61239e-08	1.81922e-06	37	10	74082489	R				chr10:74079336-74079861	S_Shelf			NA	10:74082328-74082490	Unclassified	NA
cg05991442	-2.72071	8.0359e-06	0.00138977	-2.45616	1.29614e-05	0.000202216	37	17	73636184	R	RECQL5;LOC643008;LOC643008	NM_004259;NR_028439;NM_001162995	Body;Body;5'UTR					NA			NA
cg05991902	-1.84346	3.19417e-06	0.000694718	-1.8249	8.21336e-07	1.84817e-05	37	2	9385082	F	ASAP2;ASAP2	NM_001135191;NM_003887	Body;Body					TRUE			NA
cg06002952	-3.05245	3.20048e-10	5.00064e-07	-3.42544	3.75285e-13	7.91738e-11	37	11	129013349	R	RICS	NM_001142685	Body					TRUE			TRUE
cg06005892	1.2678	5.74015e-05	0.00595637	1.62321	9.7491e-08	2.92936e-06	37	11	3177622	F	OSBPL5;OSBPL5;OSBPL5	NM_020896;NM_001144063;NM_145638	5'UTR;5'UTR;5'UTR	chr11:3181574-3182120	N_Shelf			NA			NA
cg06022832	0.569962	2.77293e-05	0.00351858	0.52325	3.25337e-05	0.00045016	37	2	24985028	F	NCOA1;NCOA1;NCOA1	NM_147223;NM_003743;NM_147233	Body;Body;Body					TRUE			NA
cg06024289	-0.667238	2.96556e-06	0.00065655	-0.777559	1.41872e-08	5.58131e-07	37	12	53342595	R	KRT18;KRT18	NM_199187;NM_000224	TSS200;TSS1500	chr12:53342805-53343162	N_Shore			NA	12:53342459-53343010	Unclassified_Cell_type_specific	TRUE
cg06026425	-1.67987	1.51022e-05	0.00223142	-2.57958	4.54669e-11	4.24487e-09	37	5	157284650	R	CLINT1	NM_014666	Body	chr5:157285769-157286254	N_Shore			NA			NA
cg06029700	-2.08437	9.35404e-09	7.30769e-06	-2.54142	1.226e-12	2.09718e-10	37	12	6473311	F	SCNN1A;SCNN1A;SCNN1A	NM_001159575;NM_001038;NM_001159576	Body;Body;Body	chr12:6472660-6473322	Island			NA	12:6472154-6473704	Promoter_Associated	NA
cg06041466	-2.68893	7.95302e-07	0.000244039	-3.43424	1.38596e-10	1.08986e-08	37	1	171106397	R	FMO6P	NR_002601	TSS1500					TRUE			NA
cg06043908	1.64919	3.38528e-08	2.08539e-05	1.60209	9.67096e-09	4.01165e-07	37	8	49467831	R				chr8:49468683-49468959	N_Shore		RDMR	NA			TRUE
cg06048910	-4.47688	1.30117e-07	5.96205e-05	-5.29081	1.32733e-10	1.04902e-08	37	11	2925473	R	SLC22A18;SLC22A18;SLC22A18AS	NM_183233;NM_002555;NM_007105	Body;Body;TSS1500	chr11:2923301-2923817	S_Shore			TRUE			NA
cg06049395	0.506221	9.91314e-05	0.0088209	0.64774	2.36931e-07	6.31706e-06	37	16	46915319	R				chr16:46917849-46918957	N_Shelf			NA			NA
cg06051311	-1.3026	6.05245e-05	0.00619376	-1.15265	0.000120517	0.0013916	37	6	30131001	F	TRIM15;TRIM15	NM_033229;NM_033229	5'UTR;1stExon					TRUE	6:30130969-30131093	Unclassified_Cell_type_specific	NA
cg06052888	-1.99258	4.28436e-06	0.000867517	-2.22301	7.19686e-08	2.25502e-06	37	6	52225658	F	PAQR8	NM_133367	TSS1500	chr6:52226753-52228006	N_Shore			NA			NA
cg06057569	-1.4216	1.04636e-05	0.00169263	-1.48695	9.73403e-07	2.1382e-05	37	22	50219754	F	BRD1	NM_014577	TSS1500	chr22:50220118-50220822	N_Shore		RDMR	NA	22:50219518-50219956	Promoter_Associated_Cell_type_specific	TRUE
cg06061240	-1.3838	9.2733e-05	0.00839442	-1.17616	0.000305376	0.00309808	37	1	51800535	R	TTC39A	NM_001144832	Body	chr1:51796097-51796589	S_Shelf			NA			NA
cg06072717	-2.68633	8.49345e-07	0.000256948	-4.40656	1.34131e-14	5.06474e-12	37	8	120066282	R								TRUE			NA
cg06072965	-1.7659	1.07036e-10	2.03021e-07	-1.80624	3.47767e-12	4.96398e-10	37	3	75482182	R	FAM86D	NR_024241	Body	chr3:75483802-75485289	N_Shore			NA			TRUE
cg06074146	0.700962	2.1591e-05	0.0029136	0.684096	8.74507e-06	0.000143888	37	13	21298449	R				chr13:21295611-21296438	S_Shelf			NA			NA
cg06092869	-1.70654	7.66004e-07	0.000237913	-1.71475	1.19888e-07	3.49868e-06	37	1	225642746	R							DMR	NA			TRUE
cg06100166	-0.867168	8.91535e-06	0.00150236	-0.890018	1.20655e-06	2.5738e-05	37	3	49377028	R	USP4;USP4	NM_003363;NM_199443	Body;Body	chr3:49377340-49377854	N_Shore			NA	3:49376597-49378455	Promoter_Associated	NA
cg06104877	-1.34083	1.15379e-05	0.00182726	-1.21125	1.81451e-05	0.000271129	37	11	64660076	R	MIR194-2;MIR192	NR_029829;NR_029578	TSS1500;TSS1500	chr11:64662462-64662880	N_Shelf			NA			NA
cg06114987	1.60383	3.96639e-05	0.00456408	1.28829	0.00030971	0.00313542	37	16	86611714	R	FOXL1	NM_005250	TSS1500	chr16:86612188-86613821	N_Shore		RDMR	TRUE			NA
cg06118122	-1.6661	3.04525e-05	0.00374959	-1.44368	8.71502e-05	0.00105295	37	1	236695160	F	LGALS8;LGALS8;LGALS8;LGALS8	NM_201544;NM_006499;NM_201545;NM_201543	Body;Body;Body;Body					NA	1:236694923-236695659	Gene_Associated	TRUE
cg06118338	-2.29281	3.28623e-06	0.0007095	-2.67212	1.6287e-08	6.28373e-07	37	11	18544818	R	TSG101	NM_006292	Body	chr11:18548060-18548629	N_Shelf			NA			NA
cg06120235	0.550924	6.39086e-05	0.00643035	0.507136	7.1117e-05	0.000883636	37	8	29211949	R				chr8:29210483-29210801	S_Shore			NA			NA
cg06127159	0.576185	0.000116016	0.00989579	0.813022	2.74388e-08	9.82757e-07	37	15	44171783	R	FRMD5;LOC728758	NM_032892;NR_003571	Body;TSS1500					NA			NA
cg06136185	1.12412	6.8992e-05	0.00680906	1.63855	4.28188e-09	1.99905e-07	37	17	79139087	R	LOC388428;AATK	NR_027255;NM_001080395	TSS1500;Body	chr17:79139501-79140028	N_Shore			NA	17:79138916-79140697	Unclassified_Cell_type_specific	NA
cg06136702	-1.79535	4.02997e-05	0.0046151	-1.94487	2.44946e-06	4.75871e-05	37	6	31082631	F	PSORS1C1;PSORS1C1	NM_014068;NM_014068	1stExon;5'UTR					TRUE			TRUE
cg06148264	-0.903523	1.12316e-05	0.00179127	-0.714137	0.00014159	0.00159775	37	6	2841468	R	SERPINB1	NM_030666	5'UTR	chr6:2841810-2842273	N_Shore			TRUE	6:2841306-2842601	Promoter_Associated_Cell_type_specific	TRUE
cg06162038	-2.83456	0.000110493	0.00953441	-4.21735	5.91381e-09	2.63082e-07	37	2	138727217	R	HNMT;HNMT	NM_001024075;NM_006895	Body;Body					NA			NA
cg06172950	-2.364	4.05652e-08	2.40795e-05	-2.08483	1.40557e-07	4.00979e-06	37	13	46075084	F	COG3	NM_031431	Body					TRUE			NA
cg06174407	-1.2709	5.44903e-05	0.00573899	-1.24042	2.3747e-05	0.000342522	37	22	29470232	F	KREMEN1;KREMEN1	NM_001039570;NM_032045	Body;Body	chr22:29468639-29470233	Island			NA	22:29468484-29470464	Unclassified	NA
cg06175008	-1.66623	1.51088e-06	0.000400394	-1.7165	1.41999e-07	4.04552e-06	37	3	71116326	R	FOXP1	NM_032682	Body	chr3:71114334-71114821	S_Shore			NA	3:71116101-71116400	Unclassified_Cell_type_specific	NA
cg06178669	-1.95957	3.3031e-05	0.00396702	-1.56904	0.000278785	0.00286647	37	11	63334608	F								TRUE	11:63334373-63335184	Promoter_Associated_Cell_type_specific	NA
cg06181697	-0.833381	6.59047e-05	0.00658246	-0.868903	9.31079e-06	0.000151976	37	3	50294603	R	GNAI2;GNAI2	NM_001166425;NM_002070	Body;Body	chr3:50297440-50298097	N_Shelf			NA	3:50294404-50295053	Unclassified	NA
cg06190046	-2.51078	1.08152e-06	0.00030864	-2.97418	2.23448e-09	1.13918e-07	37	16	83986382	R	OSGIN1;OSGIN1;OSGIN1	NM_182980;NM_182981;NM_013370	5'UTR;TSS1500;Body					NA			NA
cg06196145	-0.964337	7.57946e-05	0.00729855	-0.993232	1.36688e-05	0.000211786	37	11	818752	R	PNPLA2	NM_020376	TSS200	chr11:818974-820271	N_Shore			NA			NA
cg06196689	-2.49267	3.21244e-05	0.00389431	-3.47055	3.95417e-09	1.86592e-07	37	3	124653632	R	MUC13	NM_033049	TSS200					NA	3:124653462-124653765	Unclassified_Cell_type_specific	NA
cg06197966	-2.51925	4.26964e-07	0.000152467	-3.45684	4.39466e-12	6.05254e-10	37	10	29948324	F	SVIL	NM_003174	5'UTR				DMR	NA	10:29947703-29948618	Promoter_Associated	TRUE
cg06206957	-1.94553	1.24905e-06	0.000346981	-2.08078	4.46585e-08	1.49437e-06	37	7	33080615	R	NT5C3;NT5C3;NT5C3;NT5C3	NM_001166118;NR_029372;NM_016489;NM_001002010	TSS200;Body;TSS200;Body					NA	7:33080315-33080858	Promoter_Associated	NA
cg06207778	-2.49133	5.28119e-05	0.00560638	-5.07468	1.81353e-14	6.46474e-12	37	1	15672633	F	FHAD1	NM_052929	Body					NA	1:15672553-15672754	Unclassified_Cell_type_specific	NA
cg06209740	-1.17463	6.69592e-05	0.00666006	-1.48849	1.59785e-07	4.48365e-06	37	6	35435693	R	RPL10A	NM_007104	TSS1500	chr6:35435810-35437084	N_Shore			NA	6:35435158-35437111	Promoter_Associated	NA
cg06213047	1.84859	7.51691e-08	3.90003e-05	1.41857	4.76606e-06	8.48482e-05	37	16	85229676	R								NA			NA
cg06216883	-1.11798	4.7159e-06	0.000930864	-0.918122	3.95162e-05	0.000532934	37	8	2023251	F	MYOM2	NM_003970	Body					NA			NA
cg06218787	-2.04023	9.89203e-06	0.00162531	-1.37425	0.000950701	0.00810613	37	10	14575319	F	FAM107B	NM_031453	Body					TRUE			NA
cg06227406	-2.83982	6.50463e-06	0.00118898	-3.60952	3.92683e-09	1.85409e-07	37	12	70999958	F	PTPRB;PTPRB	NM_001109754;NM_002837	Body;Body	chr12:71003624-71004057	N_Shelf			NA			NA
cg06253655	-1.43483	9.30306e-05	0.0084139	-3.12542	5.16693e-15	2.32675e-12	37	10	126838173	F	CTBP2;CTBP2	NM_001083914;NM_001329	5'UTR;5'UTR	chr10:126839791-126841034	N_Shore			NA			TRUE
cg06271046	-2.30076	3.29321e-06	0.000709823	-2.54827	6.15344e-08	1.96939e-06	37	6	30782234	R								TRUE	6:30781901-30782710	Unclassified_Cell_type_specific	TRUE
cg06280807	-3.1804	1.99983e-08	1.36378e-05	-2.7111	1.66181e-07	4.64268e-06	37	2	201831749	F				chr2:201828015-201828514	S_Shelf			NA			NA
cg06285439	-3.04527	4.25389e-11	9.63751e-08	-3.40555	3.67964e-14	1.15785e-11	37	2	206613589	F	NRP2;NRP2;NRP2;NRP2;NRP2	NM_201279;NM_018534;NM_201267;NM_003872;NM_201266	Body;Body;Body;Body;Body					TRUE			TRUE
cg06285575	-0.996001	8.5279e-06	0.00145455	-0.704808	0.000490193	0.00463252	37	16	31888794	F	ZNF267	NM_003414	Body	chr16:31885042-31885600	S_Shelf			TRUE	16:31888667-31889115	Unclassified_Cell_type_specific	NA
cg06315390	-2.00073	3.09182e-10	4.90605e-07	-1.61354	1.81636e-08	6.8904e-07	37	22	45704914	F	FAM118A;FAM118A	NM_017911;NM_001104595	TSS1500;TSS200	chr22:45705511-45706616	N_Shore	low-CpG:44083485-44083617		NA	22:45704598-45704923	Promoter_Associated_Cell_type_specific	NA
cg06328338	1.45101	1.05621e-05	0.00170619	1.90851	3.13639e-09	1.52739e-07	37	16	1511419	R	CLCN7;CLCN7	NM_001287;NM_001114331	Body;Body	chr16:1510882-1511423	Island			NA			NA
cg06333233	-2.28113	6.29296e-07	0.000205963	-3.41258	3.23823e-13	6.95398e-11	37	2	101966951	R	CREG2	NM_153836	3'UTR					NA			NA
cg06339396	1.6787	7.18203e-06	0.00127176	2.12408	5.19908e-09	2.35735e-07	37	16	57736130	R	CCDC135	NM_032269	Body					NA			NA
cg06343233	0.66632	3.33071e-05	0.00399376	0.6271	2.598e-05	0.000370187	37	2	153375639	R	FMNL2	NM_052905	Body					TRUE			NA
cg06346335	1.63765	3.03678e-05	0.00374143	2.11346	2.88586e-08	1.02501e-06	37	1	76489892	R								TRUE			NA
cg06350432	-2.87331	5.34313e-07	0.000180976	-1.95681	0.000135346	0.00153686	37	7	73245752	F	CLDN4	NM_001305	1stExon	chr7:73245434-73246045	Island			TRUE			NA
cg06354543	-1.70633	5.89358e-05	0.00608154	-1.57244	6.45463e-05	0.00081254	37	10	130376572	R								TRUE			NA
cg06358171	-1.29426	2.58989e-05	0.00334759	-1.15125	5.04215e-05	0.000657041	37	1	54822008	R	SSBP3;SSBP3;SSBP3	NM_001009955;NM_018070;NM_145716	Body;Body;Body	chr1:54821990-54822333	Island			NA			NA
cg06360703	-1.27613	1.18913e-08	8.87059e-06	-1.50106	6.37746e-12	8.18619e-10	37	2	169482790	F	LASS6	NM_203463	Body					TRUE			NA
cg06367321	-2.38918	3.69119e-06	0.000773526	-2.65569	6.51052e-08	2.06761e-06	37	16	30125232	R	LOC100271831;GDPD3	NR_027081;NM_024307	TSS200;TSS1500					NA			TRUE
cg06375539	-2.29175	9.91108e-05	0.0088209	-3.06647	8.06532e-08	2.4846e-06	37	1	35249239	F	GJB3;GJB3	NM_001005752;NM_024009	5'UTR;5'UTR	chr1:35250418-35250736	N_Shore			NA	1:35248996-35249244	Unclassified	TRUE
cg06376402	-1.457	8.09287e-05	0.00765022	-1.29437	0.000149485	0.00167409	37	10	134404945	F	INPP5A	NM_005539	Body					TRUE			TRUE
cg06377226	-3.01614	2.47441e-14	3.13773e-10	-2.89809	5.44017e-15	2.43526e-12	37	4	38491918	F								TRUE	4:38491658-38492130	Unclassified_Cell_type_specific	NA
cg06380401	-1.84929	0.000114059	0.00976972	-1.63566	0.000218595	0.00232557	37	3	30349908	R								TRUE			NA
cg06380725	1.13491	2.79571e-05	0.00353876	1.54473	5.92123e-09	2.63326e-07	37	6	111894647	R	TRAF3IP2;TRAF3IP2;TRAF3IP2;TRAF3IP2	NR_028338;NM_001164282;NM_001164281;NM_147686	Body;5'UTR;Body;Body					NA			NA
cg06388350	-1.93256	1.81535e-12	8.13523e-09	-1.43741	2.73196e-09	1.35289e-07	37	4	95334135	R								TRUE			NA
cg06399735	-1.10227	5.90781e-05	0.00609468	-0.857211	0.000627406	0.00570896	37	8	18836280	R	PSD3	NM_015310	Body					TRUE			TRUE
cg06419846	1.37587	1.1127e-05	0.00177911	1.65066	4.19126e-08	1.41374e-06	37	11	66083697	F	CD248	NM_020404	1stExon	chr11:66083572-66083782	Island			NA			NA
cg06429194	-2.01601	2.55214e-05	0.00330719	-2.57275	2.93815e-08	1.04145e-06	37	11	128080305	R								TRUE			TRUE
cg06434490	-1.93931	3.0727e-05	0.0037714	-1.71984	6.19964e-05	0.000784948	37	6	31494261	F								TRUE			NA
cg06438942	-1.28445	3.96369e-05	0.00456354	-1.49503	5.23176e-07	1.25295e-05	37	6	31805329	F	C6orf48;C6orf48	NM_001040438;NM_001040437	Body;Body	chr6:31802598-31802823	S_Shelf			NA			NA
cg06444294	-0.966603	1.02166e-05	0.00166306	-1.63104	6.783e-13	1.28808e-10	37	19	50164473	F	IRF3	NM_001571	Body	chr19:50167690-50168198	N_Shelf	low-CpG:54856051-54856321		NA			NA
cg06456031	-1.33001	7.17604e-07	0.000227383	-0.892187	0.000200434	0.0021589	37	7	134832850	F	TMEM140;TMEM140	NM_018295;NM_018295	1stExon;5'UTR			low-CpG:134483321-134483469		TRUE	7:134832501-134833286	Promoter_Associated	NA
cg06473578	-2.1134	1.1013e-05	0.001764	-2.98675	3.83467e-10	2.56066e-08	37	13	47130714	R	LRCH1;LRCH1;LRCH1	NM_015116;NM_001164213;NM_001164211	Body;Body;Body	chr13:47126970-47128706	S_Shelf			NA			NA
cg06475541	-2.08416	6.19472e-09	5.32961e-06	-2.56082	5.19173e-13	1.03027e-10	37	13	34731213	F								TRUE	13:34731195-34731308	Unclassified_Cell_type_specific	TRUE
cg06481660	0.71843	2.91244e-05	0.00363213	1.02093	1.8293e-09	9.58618e-08	37	6	6824580	F								TRUE			NA
cg06492521	1.04438	7.33652e-05	0.00714219	1.36441	8.81906e-08	2.68312e-06	37	10	532357	F	DIP2C	NM_014974	Body	chr10:530713-531099	S_Shore			NA			NA
cg06495763	-2.5241	1.3851e-06	0.000376064	-2.995	2.9964e-09	1.46762e-07	37	11	2925470	R	SLC22A18;SLC22A18;SLC22A18AS	NM_183233;NM_002555;NM_007105	Body;Body;TSS1500	chr11:2923301-2923817	S_Shore			TRUE			NA
cg06504162	0.994664	6.1004e-05	0.00622876	0.772045	0.000657338	0.00593944	37	11	11559800	R	GALNTL4	NM_198516	Body					TRUE			NA
cg06505273	-1.8885	2.47762e-06	0.000572779	-2.01999	1.02562e-07	3.06122e-06	37	16	24850292	F								TRUE			NA
cg06507244	2.0798	7.1711e-06	0.00127037	3.31753	2.72181e-12	4.04065e-10	37	10	127569494	R	DHX32;DHX32	NM_018180;NM_018180	5'UTR;1stExon					TRUE			NA
cg06512263	-2.33337	1.36318e-09	1.61602e-06	-1.78175	2.37986e-07	6.34036e-06	37	6	20709867	F	CDKAL1	NM_017774	Body					TRUE			NA
cg06518387	-1.11991	5.54093e-05	0.00580579	-1.16631	7.73113e-06	0.000129393	37	11	76040637	R								TRUE			NA
cg06518884	-2.1161	4.29696e-09	4.01907e-06	-2.54292	7.43241e-13	1.38464e-10	37	3	185822021	R	ETV5	NM_004454	Body	chr3:185825462-185827003	N_Shelf			NA			TRUE
cg06528773	-0.981364	4.06626e-05	0.00464362	-0.752257	0.000561594	0.00519898	37	11	62382998	R	B3GAT3	NM_012200	3'UTR	chr11:62379638-62380556	S_Shelf			NA			NA
cg06530983	-2.15918	1.02687e-08	7.92963e-06	-2.25142	3.15952e-10	2.17794e-08	37	16	9141884	R								TRUE	16:9141871-9141933	Unclassified_Cell_type_specific	TRUE
cg06534586	-3.54361	4.8376e-12	1.70375e-08	-3.76616	2.34525e-14	8.00336e-12	37	5	130664529	F	CDC42SE2;CDC42SE2	NM_001038702;NM_020240	5'UTR;5'UTR					TRUE			NA
cg06538549	-1.85902	8.81157e-07	0.000263832	-2.50866	2.55247e-11	2.61601e-09	37	10	33244887	R	ITGB1;ITGB1	NM_002211;NM_133376	5'UTR;5'UTR	chr10:33246271-33247707	N_Shore			NA			NA
cg06541857	-1.06054	1.45851e-05	0.00217711	-1.0154	8.17873e-06	0.000135831	37	3	134203789	R	ANAPC13;ANAPC13;CEP63;CEP63;CEP63;ANAPC13;CEP63	NM_015391;NR_024401;NM_001042384;NM_001042400;NM_001042383;NR_024400;NM_025180	5'UTR;Body;TSS1500;TSS1500;TSS1500;Body;TSS1500	chr3:134204520-134205439	N_Shore			NA			NA
cg06547285	-1.91718	7.18044e-05	0.00702714	-1.50925	0.000631867	0.00574238	37	12	47630263	R	FAM113B	NM_138371	3'UTR	chr12:47629034-47629680	S_Shore			NA			TRUE
cg06551476	-1.54859	5.13211e-05	0.00549172	-1.60926	7.34624e-06	0.000123789	37	19	35045764	F							DMR	NA			NA
cg06561366	-1.73882	8.57844e-09	6.87293e-06	-2.12972	9.16964e-13	1.64805e-10	37	12	56727304	R	PAN2;PAN2;PAN2;PAN2	NM_001166279;NM_001127460;NM_014871;NM_001127460	5'UTR;1stExon;5'UTR;5'UTR	chr12:56727661-56727996	N_Shore			NA	12:56727202-56728951	Promoter_Associated	NA
cg06564875	-2.14161	8.58856e-05	0.00796193	-2.25399	1.0805e-05	0.000172763	37	5	157353780	R								TRUE	5:157353765-157353831	Unclassified_Cell_type_specific	NA
cg06575425	-1.88419	4.84609e-06	0.000952412	-1.70394	7.71788e-06	0.000129182	37	20	34195484	F	FER1L4	NR_024377	TSS200					NA			NA
cg06585307	0.881159	8.06473e-05	0.00762892	1.13997	1.30731e-07	3.76235e-06	37	16	1581015	F	IFT140	NM_014714	Body	chr16:1583809-1584641	N_Shelf			NA	16:1580897-1581219	Unclassified_Cell_type_specific	TRUE
cg06589239	-2.47493	1.05666e-05	0.00170619	-4.16185	8.31149e-13	1.5213e-10	37	7	961457	R	ADAP1	NM_006869	Body	chr7:959724-959959	S_Shore		DMR	NA			TRUE
cg06601071	-1.18196	9.8527e-08	4.7839e-05	-1.30255	8.45068e-10	4.96502e-08	37	16	85525842	R				chr16:85529839-85530128	N_Shelf			TRUE	16:85524317-85526558	Unclassified	TRUE
cg06601579	0.813269	4.10846e-07	0.00014827	0.717567	1.21054e-06	2.58191e-05	37	7	142966	F								NA			NA
cg06601993	-2.5562	1.88076e-06	0.000469964	-3.75074	4.7028e-12	6.38422e-10	37	7	80244500	R	CD36	NM_001001547	5'UTR					TRUE			NA
cg06602086	1.52222	7.98172e-05	0.00757148	1.22423	0.000533677	0.00497715	37	16	1583883	R	IFT140;TMEM204	NM_014714;NM_024600	Body;TSS1500	chr16:1583809-1584641	Island			TRUE			NA
cg06602478	-3.14833	1.85869e-07	7.93699e-05	-4.69126	4.48057e-14	1.35851e-11	37	3	195159296	R	ACAP2	NM_012287	Body	chr3:195162891-195164119	N_Shelf			NA			NA
cg06612130	-1.41345	9.4126e-05	0.00848099	-1.41131	2.97065e-05	0.000416146	37	4	185269299	F								TRUE			NA
cg06613738	-1.7327	8.52334e-05	0.00792488	-1.86883	6.84158e-06	0.000116333	37	16	15596423	R	C16orf45;C16orf45	NM_001142469;NM_033201	Body;Body					TRUE			TRUE
cg06615464	0.959773	5.06661e-06	0.000981421	1.01367	3.29561e-07	8.39923e-06	37	1	32080287	R				chr1:32083149-32084069	N_Shelf			NA			NA
cg06618497	-2.14535	3.26483e-06	0.000706693	-3.02894	4.77682e-11	4.4283e-09	37	14	102198604	R	C14orf72	NR_026774	Body					TRUE			NA
cg06625004	-1.55486	4.82492e-06	0.000949608	-1.72405	9.7671e-08	2.93368e-06	37	1	228278432	R	ARF1;ARF1;ARF1;ARF1	NM_001658;NM_001024228;NM_001024227;NM_001024226	5'UTR;5'UTR;5'UTR;5'UTR					TRUE	1:228278410-228278558	Unclassified_Cell_type_specific	NA
cg06635351	-2.51214	3.17123e-08	1.99979e-05	-1.79739	9.35492e-06	0.000152578	37	1	8882925	F								TRUE			TRUE
cg06635797	-2.4702	1.33812e-09	1.59558e-06	-2.59873	2.23274e-11	2.34731e-09	37	19	4915394	F	UHRF1;UHRF1	NM_013282;NM_001048201	Body;Body	chr19:4916560-4916784	N_Shore			NA	19:4915016-4915535	Promoter_Associated_Cell_type_specific	TRUE
cg06639053	-1.66164	7.8241e-05	0.00746576	-1.67041	2.15459e-05	0.000314918	37	12	111837470	R				chr12:111834869-111835085	S_Shelf			NA	12:111837272-111837484	Unclassified_Cell_type_specific	NA
cg06639585	1.2269	3.51885e-06	0.000747007	1.11204	5.43119e-06	9.50298e-05	37	6	36236936	R	PNPLA1;PNPLA1;PNPLA1	NM_001145717;NM_173676;NM_001145716	TSS1500;5'UTR;5'UTR					NA			NA
cg06644515	-1.79496	1.54066e-06	0.000405607	-1.7527	5.02863e-07	1.21121e-05	37	1	173834831	R	SNORD47;GAS5;SNORD81;SNORD80;SNORD78;SNORD79	NR_002746;NR_002578;NR_003938;NR_003940;NR_003944;NR_003939	TSS1500;Body;TSS1500;TSS1500;TSS200;TSS1500	chr1:173837172-173837917	N_Shelf			NA			NA
cg06644719	-1.80852	1.79714e-06	0.000455772	-2.70251	2.21571e-12	3.40843e-10	37	2	235178208	R								TRUE			NA
cg06647928	-1.22053	1.68002e-05	0.00241559	-0.994952	0.000126507	0.0014503	37	5	73612203	F								TRUE			TRUE
cg06655216	-3.10123	1.21645e-12	5.90564e-09	-3.65998	4.34253e-17	5.11821e-14	37	12	89619329	F								TRUE	12:89618920-89619560	Unclassified	NA
cg06660385	-1.714	1.5984e-06	0.000416243	-2.09074	1.62737e-09	8.68879e-08	37	3	49944155	R				chr3:49947621-49948430	N_Shelf			NA	3:49943546-49945039	Unclassified	NA
cg06669446	-1.26004	7.92891e-08	4.04686e-05	-1.17582	6.72502e-08	2.12646e-06	37	16	89475959	F	ANKRD11	NM_013275	5'UTR					TRUE	16:89475477-89476091	Unclassified_Cell_type_specific	NA
cg06677151	1.24228	8.91352e-09	7.05819e-06	1.23114	1.2975e-09	7.15754e-08	37	10	616959	F	DIP2C	NM_014974	Body					TRUE			NA
cg06691963	0.39443	0.00010255	0.00905985	0.366042	0.000100948	0.00119557	37	3	71149599	R	FOXP1	NM_032682	Body					TRUE			NA
cg06694331	-2.06405	2.74464e-09	2.88473e-06	-2.43217	8.69383e-13	1.58205e-10	37	19	45284273	F	CBLC;CBLC	NM_001130852;NM_012116	Body;Body	chr19:45281133-45281355	S_Shelf			NA			NA
cg06698470	1.08869	5.92198e-06	0.00110402	0.923862	2.81824e-05	0.000397376	37	16	80654751	R	CDYL2	NM_152342	Body					NA			NA
cg06709297	-3.46072	2.32459e-08	1.55406e-05	-5.05056	3.25765e-15	1.60159e-12	37	2	10302454	R	C2orf48	NM_182626	Body					NA			TRUE
cg06710328	-1.62392	7.20854e-05	0.0070445	-2.42662	2.26648e-09	1.15333e-07	37	11	33217195	R								TRUE			NA
cg06713671	-2.03601	1.775e-05	0.00252125	-1.77503	4.86783e-05	0.000637749	37	19	5914158	R	CAPS;CAPS	NM_004058;NM_080590	TSS200;TSS200	chr19:5915007-5915301	N_Shore			TRUE			TRUE
cg06716182	-1.92793	9.71082e-06	0.00160523	-1.60876	5.6553e-05	0.000724941	37	11	96074944	F	MAML2	NM_032427	1stExon					TRUE	11:96073293-96075795	Promoter_Associated	NA
cg06720467	-1.4444	8.46074e-05	0.00789006	-1.11606	0.000885233	0.00763347	37	1	27189440	R	SFN	NM_006142	TSS200	chr1:27189912-27190128	N_Shore			NA	1:27189212-27189557	Unclassified_Cell_type_specific	TRUE
cg06726820	2.27346	2.65925e-05	0.00341237	3.63264	3.6438e-11	3.52456e-09	37	3	139259742	R	RBP1;RBP1;RBP1	NM_001130992;NM_001130993;NM_002899	TSS1500;TSS1500;TSS1500	chr3:139257712-139257949	S_Shore			NA			NA
cg06728055	-1.8254	3.08751e-07	0.000119606	-1.02946	0.00104105	0.008748	37	3	149294286	R	WWTR1;WWTR1;WWTR1	NM_015472;NM_001168278;NM_001168280	Body;Body;Body					TRUE			NA
cg06732687	-1.27067	4.60735e-05	0.00507712	-1.19267	3.78119e-05	0.000513567	37	14	56299289	R								TRUE			NA
cg06738887	-2.60128	3.4987e-06	0.00074428	-3.98879	2.91203e-12	4.27479e-10	37	15	60688010	R	ANXA2;ANXA2;ANXA2;ANXA2	NM_001136015;NM_004039;NM_001002858;NM_001002857	5'UTR;5'UTR;Body;5'UTR	chr15:60689749-60690430	N_Shore		CDMR	NA			NA
cg06739004	-2.37027	8.68197e-06	0.00147338	-3.59638	2.36809e-11	2.46105e-09	37	7	99751594	R	C7orf59	NM_001008395	3'UTR					NA			NA
cg06747543	-1.31907	5.92774e-05	0.00610544	-1.71346	7.1738e-08	2.24883e-06	37	19	18589894	R	ELL	NM_006532	Body				DMR	NA	19:18589579-18590197	Unclassified	TRUE
cg06752040	-1.64196	2.87212e-05	0.00359829	-3.24711	1.2705e-14	4.8558e-12	37	10	14647373	F	FAM107B	NM_031453	Body	chr10:14645752-14646705	S_Shore		RDMR	NA			NA
cg06752054	-3.01187	1.23384e-05	0.00191682	-4.38944	1.75917e-10	1.33147e-08	37	21	42733747	F	MX2	NM_002463	TSS1500					NA	21:42733352-42734832	Promoter_Associated	TRUE
cg06757356	-1.7121	8.60516e-06	0.00146278	-1.3591	0.000107948	0.00126597	37	13	60712449	R	DIAPH3	NM_001042517	Body					TRUE			NA
cg06761530	0.804441	1.75599e-05	0.00250034	0.899502	4.28212e-07	1.05324e-05	37	17	75373219	R	SEPT9;SEPT9;SEPT9;SEPT9;SEPT9	NM_001113494;NM_001113492;NM_001113493;NM_001113491;NM_006640	5'UTR;5'UTR;Body;Body;Body	chr17:75368688-75370506	S_Shelf			NA			NA
cg06762457	-2.58723	4.51402e-08	2.63353e-05	-2.48125	1.85646e-08	7.02424e-07	37	6	149806635	F	ZC3H12D	NM_207360	TSS1500					NA	6:149805583-149806902	Promoter_Associated	NA
cg06769377	-1.98842	1.64149e-07	7.2212e-05	-2.19497	1.51909e-09	8.19212e-08	37	1	228350860	R				chr1:228353108-228353986	N_Shelf			NA			TRUE
cg06783197	-2.37956	1.25148e-08	9.17751e-06	-1.40526	0.000118479	0.00137168	37	14	105796964	F	PACS2;PACS2	NM_015197;NM_001100913	Body;Body	chr14:105796420-105796749	S_Shore			NA			TRUE
cg06787397	-2.1409	1.43806e-06	0.000386073	-2.83612	1.04037e-10	8.52094e-09	37	12	13530144	F	C12orf36	NM_182558	TSS1500					NA			NA
cg06795649	-1.80641	7.97159e-11	1.6014e-07	-1.0945	4.79751e-06	8.53214e-05	37	15	30135976	F								TRUE			TRUE
cg06798115	-2.20492	1.94314e-06	0.000480838	-2.32577	1.07612e-07	3.19417e-06	37	3	45241685	R								TRUE			TRUE
cg06801994	1.06153	3.62533e-08	2.2099e-05	1.25198	2.54935e-11	2.61346e-09	37	13	113834082	R	PCID2;PCID2;PCID2	NM_001127203;NM_018386;NM_001127202	Body;Body;Body					TRUE	13:113834004-113834178	Gene_Associated_Cell_type_specific	NA
cg06802985	-1.26964	0.000106883	0.00931909	-1.52969	1.0218e-06	2.22784e-05	37	5	179341359	R								TRUE			TRUE
cg06804091	-1.17856	2.18423e-07	9.07064e-05	-1.2338	9.83956e-09	4.07124e-07	37	7	2563478	R	LFNG;LFNG;LFNG;LFNG	NM_001166355;NM_001040167;NM_001040168;NM_002304	Body;Body;Body;Body	chr7:2563610-2564056	N_Shore			TRUE	7:2563453-2563709	Unclassified_Cell_type_specific	NA
cg06804823	-2.1107	4.07695e-07	0.000147524	-2.47404	8.07596e-10	4.77999e-08	37	6	31798635	F				chr6:31795467-31797384	S_Shore		RDMR	NA			NA
cg06810490	-2.89685	3.62812e-07	0.00013574	-2.17152	2.37008e-05	0.000341965	37	7	65449491	F				chr7:65446771-65447340	S_Shelf			NA			NA
cg06817269	-2.41939	1.16089e-06	0.000327955	-3.65941	6.34813e-13	1.22047e-10	37	15	59909035	F	GCNT3	NM_004751	5'UTR					NA			NA
cg06817454	-3.0424	1.58552e-07	7.01281e-05	-4.64947	1.18503e-14	4.58067e-12	37	1	48360454	F								TRUE			TRUE
cg06821182	-2.53974	9.4192e-08	4.61127e-05	-3.12723	2.12468e-11	2.25287e-09	37	6	7401622	F	RIOK1;RIOK1	NM_153005;NM_031480	TSS1500;Body					NA			NA
cg06832359	-1.88108	2.68839e-05	0.00344002	-2.43597	2.16902e-08	8.03656e-07	37	1	205633759	R	SLC45A3	NM_033102	Body	chr1:205631977-205632254	S_Shore			TRUE			TRUE
cg06834177	-3.51601	6.81961e-07	0.000218294	-6.78085	5.48582e-18	9.72669e-15	37	1	6333843	F	ACOT7;ACOT7;ACOT7;ACOT7	NM_181864;NM_181865;NM_007274;NM_181866	Body;Body;Body;Body					TRUE			TRUE
cg06837067	-1.61231	1.91244e-11	5.23424e-08	-1.98456	2.07464e-16	1.77741e-13	37	22	39381429	R	APOBEC3B	NM_004900	Body					NA	22:39381182-39381495	Unclassified	TRUE
cg06838283	1.53384	8.6031e-07	0.000259495	0.900088	0.00111344	0.00925811	37	5	111090142	F	C5orf13;C5orf13;C5orf13;C5orf13;C5orf13;C5orf13;C5orf13;C5orf13;C5orf13;C5orf13;C5orf13	NM_004772;NM_001142481;NM_001142479;NM_001142478;NM_001142474;NM_001142480;NM_001142475;NM_001142483;NM_001142476;NM_001142482;NM_001142477	Body;Body;Body;Body;Body;Body;Body;Body;Body;Body;Body	chr5:111093438-111093980	N_Shelf		RDMR	NA			NA
cg06839483	1.00814	1.53649e-05	0.00226482	1.33806	4.44602e-09	2.06269e-07	37	9	34372236	R	KIAA1161	NM_020702	Body	chr9:34370773-34372902	Island			NA			NA
cg06840535	-1.55419	6.3126e-05	0.0063831	-1.80849	1.0082e-06	2.20184e-05	37	16	85208125	R				chr16:85204598-85205031	S_Shelf		RDMR	NA			NA
cg06846495	-1.38415	3.65888e-05	0.00428848	-2.79507	9.84296e-15	3.92606e-12	37	2	232326668	R	NCL	NM_005381	Body	chr2:232328445-232330149	N_Shore	low-CpG:232034708-232034927		NA			NA
cg06851151	-1.40584	2.59011e-06	0.00059174	-2.10143	4.2535e-12	5.88863e-10	37	5	133436368	R								TRUE	5:133435851-133436550	Unclassified	TRUE
cg06852395	-1.13271	3.65958e-05	0.00428848	-1.82819	5.02869e-11	4.6177e-09	37	17	7478131	R	EIF4A1;SNORA48	NM_001416;NR_002918	Body;Body	chr17:7475916-7477330	S_Shore			NA			NA
cg06856891	-1.90381	7.93951e-05	0.00754196	-2.88121	1.88442e-09	9.84594e-08	37	4	74903507	F	CXCL3	NM_002090	Body	chr4:74903953-74904589	N_Shore			NA			NA
cg06857116	-1.56381	6.19464e-05	0.00628436	-1.86173	5.97268e-07	1.40377e-05	37	17	15885326	F	ZSWIM7;ZSWIM7	NM_001042698;NM_001042697	Body;Body					TRUE			NA
cg06909248	-2.99265	3.49817e-07	0.000132212	-3.90543	1.92533e-11	2.07494e-09	37	17	70256462	F								TRUE			NA
cg06912227	0.917458	1.33774e-06	0.000365397	1.17717	2.6249e-10	1.86249e-08	37	16	4053409	R	ADCY9	NM_001116	Body					NA			NA
cg06913958	-0.899279	1.81139e-06	0.000458029	-0.639237	0.000165043	0.00182394	37	1	85744641	F	BCL10	NM_003921	TSS1500	chr1:85741865-85742535	S_Shelf			NA			TRUE
cg06927343	1.1076	8.68883e-06	0.00147393	1.81198	1.56566e-12	2.55392e-10	37	1	9635799	R	SLC25A33	NM_032315	Body					NA	1:9635787-9635850	Gene_Associated_Cell_type_specific	NA
cg06936290	-2.52	3.97605e-05	0.00457133	-1.80168	0.00120772	0.00991751	37	7	13889871	F								TRUE	7:13889694-13890048	Unclassified_Cell_type_specific	TRUE
cg06945807	1.23287	1.10012e-05	0.00176281	2.03541	1.81299e-12	2.8813e-10	37	1	95061616	F								TRUE			NA
cg06964912	-1.0608	5.95386e-05	0.0061236	-0.895236	0.000228058	0.00241153	37	1	1173622	F				chr1:1173915-1174263	N_Shore			NA	1:1173528-1173699	Unclassified	NA
cg06968164	-2.27605	1.81648e-06	0.00045846	-3.47035	1.06058e-12	1.85646e-10	37	13	45629698	F								TRUE			TRUE
cg06984848	1.21443	4.9176e-05	0.00532365	1.42881	5.57725e-07	1.32496e-05	37	16	85320722	R				chr16:85320574-85320775	Island			TRUE	16:85319720-85320969	Unclassified_Cell_type_specific	TRUE
cg06990142	1.11049	4.8893e-05	0.00530286	1.3796	1.57618e-07	4.43199e-06	37	8	284059	F								NA			NA
cg06997549	1.17733	1.61452e-05	0.0023456	0.857661	0.00053183	0.00496264	37	12	2944163	F	NRIP2;NRIP2	NM_031474;NM_031474	5'UTR;1stExon					TRUE	12:2943810-2944634	Unclassified_Cell_type_specific	TRUE
cg07004744	1.15101	1.65782e-05	0.00238977	0.949478	0.00010555	0.00124239	37	8	641479	R	ERICH1	NM_207332	Body	chr8:637393-638251	S_Shelf			NA			NA
cg07007986	0.539478	6.26285e-05	0.00634065	0.528569	2.58985e-05	0.000369142	37	14	95105801	F	SERPINA13	NR_015340	TSS1500					NA			NA
cg07011538	-2.04924	6.93179e-08	3.66642e-05	-1.51472	9.0301e-06	0.000147993	37	2	47497026	R				chr2:47499464-47499813	N_Shelf			NA			TRUE
cg07012178	-2.32984	2.24264e-06	0.000532843	-3.66974	4.53114e-13	9.25759e-11	37	7	151304708	R	PRKAG2;PRKAG2;PRKAG2	NM_016203;NM_001040633;NM_024429	Body;Body;Body	chr7:151300169-151300726	S_Shelf			TRUE			NA
cg07027075	-1.15669	3.09629e-05	0.00378514	-1.76321	2.35408e-10	1.69373e-08	37	4	39461721	R	LIAS;RPL9;LIAS	NM_006859;NM_000661;NM_194451	Body;TSS1500;Body	chr4:39460087-39460811	S_Shore			NA	4:39461593-39461764	Promoter_Associated	NA
cg07028768	-3.38959	6.7301e-09	5.70595e-06	-3.81778	1.43784e-11	1.62696e-09	37	16	1022650	F				chr16:1020219-1021303	S_Shore			NA			NA
cg07042007	1.82399	7.63434e-07	0.000237461	1.96745	1.96038e-08	7.37362e-07	37	4	2303638	F	ZFYVE28	NM_020972	Body	chr4:2305514-2305793	N_Shore			TRUE			NA
cg07048592	1.06259	8.43945e-06	0.00144449	1.06142	1.99017e-06	3.9757e-05	37	2	236539618	F	AGAP1;AGAP1	NM_014914;NM_001037131	Body;Body					NA			NA
cg07061500	-1.02043	6.17344e-05	0.00627349	-1.26739	2.26536e-07	6.07577e-06	37	6	159290520	R				chr6:159290673-159291195	N_Shore			TRUE	6:159290051-159291628	Unclassified	NA
cg07072405	-1.77913	7.82307e-06	0.00135988	-2.3098	2.83607e-09	1.39816e-07	37	12	105839243	R								TRUE			NA
cg07083818	-2.80204	1.01783e-06	0.000295218	-2.20651	2.27143e-05	0.000329679	37	19	18385672	R	KIAA1683;KIAA1683;KIAA1683	NM_025249;NM_001145304;NM_001145305	TSS1500;TSS1500;TSS1500					TRUE	19:18385327-18386522	Unclassified	NA
cg07084709	-2.64812	3.8353e-07	0.000141287	-3.0404	1.39359e-09	7.62116e-08	37	15	57883511	F	GCOM1;GCOM1;GCOM1;GCOM1	NM_001018090;NM_152451;NM_001018100;NM_001018091	TSS1500;TSS1500;TSS1500;TSS1500	chr15:57883998-57884358	N_Shore			NA	15:57883364-57884938	Unclassified_Cell_type_specific	NA
cg07086380	-3.06779	8.40179e-10	1.06915e-06	-1.63009	0.000140798	0.00159044	37	5	118691033	R	TNFAIP8;TNFAIP8	NM_001077654;NM_014350	Body;TSS1500	chr5:118691401-118691759	N_Shore			NA	5:118690889-118691710	Unclassified	NA
cg07088513	-1.95668	3.13059e-05	0.00382007	-2.48998	4.35671e-08	1.46236e-06	37	3	48232722	R				chr3:48229077-48230285	S_Shelf			NA			NA
cg07090539	-1.44014	3.22909e-07	0.000124582	-1.86114	2.39386e-11	2.4853e-09	37	17	70619853	R								TRUE			NA
cg07092111	-1.41638	2.72664e-05	0.00347875	-1.25116	5.8913e-05	0.000751203	37	10	32621403	F	EPC1	NM_025209	Body					TRUE	10:32621213-32621662	Promoter_Associated	NA
cg07097098	-1.38364	1.75188e-05	0.0024968	-1.30834	1.23902e-05	0.000194487	37	19	55721638	F	PTPRH;PTPRH	NM_002842;NM_001161440	TSS1500;TSS1500					NA			NA
cg07102937	-1.73906	8.73638e-06	0.00147822	-2.40959	4.77248e-10	3.07316e-08	37	7	966968	F	ADAP1	NM_006869	Body	chr7:965987-966266	S_Shore			NA			NA
cg07114810	-2.56374	3.40293e-06	0.000728466	-3.305	9.51368e-10	5.50862e-08	37	12	7070679	R								TRUE	12:7069947-7071841	Promoter_Associated	NA
cg07123481	-1.09699	1.78067e-05	0.00252525	-0.871399	0.000189876	0.00206046	37	1	1101431	F	MIR200B	NR_029639	TSS1500	chr1:1098043-1100584	S_Shore			NA	1:1101104-1102364	Unclassified_Cell_type_specific	NA
cg07129104	-1.31387	3.6986e-05	0.00432417	-1.25118	2.37803e-05	0.000342941	37	16	2907517	F	PRSS22	NM_022119	Body	chr16:2907574-2907836	N_Shore			NA	16:2907482-2908940	Unclassified_Cell_type_specific	TRUE
cg07133174	-3.82081	9.73975e-11	1.86475e-07	-2.12691	2.43912e-05	0.000350477	37	21	38360850	F	HLCS	NM_000411	5'UTR	chr21:38362015-38362868	N_Shore			NA			NA
cg07134230	-1.2437	1.57667e-06	0.000412808	-1.01856	1.65777e-05	0.000250666	37	1	156631248	R				chr1:156627342-156627576	S_Shelf	low-CpG:154897797-154897891	RDMR	TRUE	1:156631063-156631457	Promoter_Associated	NA
cg07139350	1.30672	1.41049e-06	0.000380929	1.3878	6.18212e-08	1.97733e-06	37	1	12416368	R	VPS13D;VPS13D	NM_015378;NM_018156	Body;Body					TRUE			NA
cg07144560	-2.85091	1.32458e-09	1.58408e-06	-2.8008	2.17872e-10	1.58607e-08	37	5	148865756	F								TRUE			TRUE
cg07145664	1.77967	3.30723e-08	2.05282e-05	1.70128	1.46384e-08	5.73063e-07	37	6	2579591	R								TRUE			NA
cg07148591	-1.92468	9.76273e-07	0.000285601	-1.96097	1.12434e-07	3.31292e-06	37	15	69457701	F	MIR548H4;GLCE	NR_031680;NM_015554	Body;5'UTR	chr15:69452451-69453939	S_Shelf			NA			NA
cg07161179	-1.37652	1.17723e-06	0.000331316	-1.16046	7.70094e-06	0.000128946	37	11	698201	F	TMEM80;TMEM80	NM_174940;NM_001042463	Body;Body	chr11:694761-696375	S_Shore			TRUE			NA
cg07161848	-1.44644	0.000116892	0.00995279	-1.4238	4.75031e-05	0.00062458	37	10	102123573	F	SCD	NM_005063	3'UTR			low-CpG:102113149-102113839		NA			NA
cg07168939	-1.05052	8.53282e-06	0.00145473	-1.30023	1.24577e-08	4.9807e-07	37	8	143763412	R	PSCA	NM_005672	Body					NA			TRUE
cg07172755	-2.53869	2.4726e-06	0.000571943	-4.03936	3.69086e-13	7.81895e-11	37	10	76686668	R	MYST4	NM_012330	Body					TRUE			NA
cg07177437	-1.30569	0.000103577	0.0091184	-1.7503	8.30657e-08	2.54753e-06	37	1	160850377	R	ITLN1	NM_017625	Body					NA			NA
cg07178968	-1.83001	2.84397e-05	0.00357627	-2.64966	9.99154e-10	5.73886e-08	37	15	42130662	F	JMJD7-PLA2G4B;JMJD7-PLA2G4B;PLA2G4B	NR_015346;NM_005090;NM_001114633	Body;Body;TSS1500					NA			TRUE
cg07185664	-1.87092	1.66519e-05	0.00239869	-2.44868	7.52318e-09	3.23695e-07	37	17	1412950	F	INPP5K;INPP5K;INPP5K	NM_130766;NM_001135642;NM_016532	Body;Body;Body	chr17:1412125-1412450	S_Shore			NA	17:1412940-1413100	Unclassified_Cell_type_specific	NA
cg07188239	-0.962689	2.14506e-05	0.00290042	-1.60503	5.18556e-12	6.90602e-10	37	3	49146386	F	USP19	NM_006677	3'UTR					NA			NA
cg07197642	-1.05224	8.35374e-07	0.000254083	-1.03265	2.31566e-07	6.19398e-06	37	22	41763417	R	TEF;TEF	NM_001145398;NM_001145398	1stExon;5'UTR			low-CpG:40093245-40093462		TRUE	22:41763076-41763760	Unclassified_Cell_type_specific	NA
cg07197831	-1.8375	6.88991e-06	0.00123654	-1.72758	5.28603e-06	9.28285e-05	37	2	27503157	F	DNAJC5G	NM_173650	3'UTR					NA	2:27502001-27503899	Unclassified	TRUE
cg07207982	2.3691	3.82178e-06	0.000794646	2.80831	1.26735e-08	5.05853e-07	37	6	34984930	R	ANKS1A	NM_015245	Body			low-CpG:35092779-35093041		NA			NA
cg07209071	2.10067	6.72244e-05	0.00667341	3.28153	5.14027e-10	3.25844e-08	37	1	3100259	R	PRDM16;PRDM16	NM_022114;NM_199454	Body;Body	chr1:3102540-3103352	N_Shelf			NA			NA
cg07209244	-2.33469	4.22986e-12	1.55401e-08	-2.44382	3.78146e-14	1.17897e-11	37	5	172116212	F	NEURL1B	NM_001142651	3'UTR	chr5:172113677-172113905	S_Shelf			NA	5:172115113-172116226	Unclassified	TRUE
cg07213830	-2.3324	1.65951e-07	7.28475e-05	-2.16887	1.54154e-07	4.34627e-06	37	1	1093940	R				chr1:1093211-1093476	S_Shore			TRUE			NA
cg07214760	-1.62794	1.19176e-05	0.00187285	-2.16055	2.93961e-09	1.44345e-07	37	12	118546039	F				chr12:118541054-118542135	S_Shelf			NA			NA
cg07215695	-1.59535	3.27124e-05	0.00393982	-1.53124	1.82952e-05	0.000273132	37	2	85637834	R	CAPG	NM_001747	TSS200	chr2:85640969-85641259	N_Shelf			NA	2:85637129-85637859	Promoter_Associated	NA
cg07217824	-2.2058	3.37049e-05	0.00402961	-2.07729	2.60199e-05	0.000370652	37	7	135665682	F				chr7:135661841-135662272	S_Shelf			NA	7:135665511-135665816	Unclassified_Cell_type_specific	NA
cg07223106	1.48634	7.51442e-08	3.90003e-05	1.07176	1.48805e-05	0.000228115	37	1	233155919	R	PCNXL2	NM_014801	Body					TRUE			NA
cg07232003	2.40058	6.18684e-12	2.10251e-08	2.89803	1.17462e-16	1.13511e-13	37	10	28971331	F	BAMBI	NM_012342	3'UTR					NA			NA
cg07236912	-1.01477	2.44763e-05	0.00321985	-0.871257	8.21194e-05	0.000999779	37	4	95429383	F	PDLIM5;PDLIM5;PDLIM5;PDLIM5;PDLIM5	NR_024179;NM_001011515;NM_006457;NM_001011516;NM_001011513	Body;Body;Body;Body;Body					TRUE			NA
cg07238066	-1.53007	1.84506e-07	7.89056e-05	-1.37091	4.06313e-07	1.00666e-05	37	11	65188862	R	NEAT1	NR_028272	TSS1500	chr11:65189463-65190295	N_Shore		RDMR	TRUE	11:65188622-65191947	Promoter_Associated	TRUE
cg07240000	-1.45664	0.000116956	0.00995311	-1.99771	5.79486e-08	1.86915e-06	37	1	17878538	R	ARHGEF10L	NM_018125	5'UTR					TRUE			TRUE
cg07280105	-1.27463	3.07748e-05	0.00377383	-1.57478	8.93093e-08	2.7123e-06	37	7	36322070	F	EEPD1	NM_030636	Body					TRUE			NA
cg07307142	1.67536	1.34664e-05	0.00205295	1.40478	6.94805e-05	0.000866205	37	16	82071433	F	HSD17B2	NM_002153	Body					TRUE			NA
cg07311994	0.933143	5.6376e-06	0.00106684	0.811673	1.77867e-05	0.000266564	37	3	8941470	R	RAD18	NM_020165	Body					TRUE			NA
cg07336872	-1.62639	2.92896e-06	0.000652345	-1.38382	1.4508e-05	0.00022316	37	6	150393535	R				chr6:150389943-150390558	S_Shelf			NA	6:150393377-150393643	Unclassified_Cell_type_specific	TRUE
cg07340894	-3.10994	2.82224e-06	0.000634117	-4.26024	1.02534e-10	8.42001e-09	37	8	8238774	F	PRAGMIN	NM_001080826	Body					NA			NA
cg07343027	-2.34075	1.94393e-05	0.00269916	-1.81426	0.000281405	0.00288896	37	17	80024200	F	DUS1L	NM_022156	TSS1500	chr17:80022655-80024178	S_Shore			NA	17:80022705-80024446	Promoter_Associated	NA
cg07347148	-1.87538	4.61119e-05	0.00507822	-2.68525	3.37919e-09	1.62546e-07	37	1	167786802	R	ADCY10;ADCY10	NM_001167749;NM_018417	Body;Body	chr1:167789396-167789647	N_Shelf			NA			NA
cg07354581	-1.91703	4.46927e-13	2.68028e-09	-1.94631	1.11945e-14	4.37276e-12	37	15	35585747	R								TRUE			TRUE
cg07356549	-1.61213	0.000102779	0.00907422	-1.59156	3.93595e-05	0.00053119	37	1	212091686	R								TRUE			TRUE
cg07362537	-1.42236	1.2547e-05	0.00193962	-1.77742	1.71502e-08	6.56708e-07	37	6	33240820	R	VPS52;RPS18	NM_022553;NM_022551	TSS1500;Body	chr6:33239326-33240099	S_Shore			NA	6:33240613-33241014	Promoter_Associated	NA
cg07364162	1.69713	5.89058e-05	0.00607998	2.41413	6.37812e-09	2.80681e-07	37	1	3115472	F	PRDM16;PRDM16	NM_022114;NM_199454	Body;Body	chr1:3111579-3111909	S_Shelf			NA			NA
cg07367222	1.8684	3.86977e-07	0.000142375	2.19644	6.87918e-10	4.17464e-08	37	1	3053584	F	PRDM16;PRDM16	NM_022114;NM_199454	Body;Body	chr1:3056541-3056772	N_Shelf			NA	1:3053264-3053698	Unclassified_Cell_type_specific	NA
cg07367601	-1.70629	2.99269e-05	0.00370052	-1.71623	7.19975e-06	0.000121587	37	1	235114342	F								TRUE	1:235114214-235114919	Promoter_Associated	NA
cg07374224	-1.21285	2.96787e-05	0.00368099	-0.989178	0.000200459	0.00215906	37	21	43809848	R	TMPRSS3;TMPRSS3;TMPRSS3	NM_024022;NR_027348;NM_032405	Body;TSS1500;Body					NA			NA
cg07375836	-2.57209	2.00506e-05	0.00276521	-4.25057	6.18206e-12	7.99071e-10	37	17	35717813	F	ACACA;ACACA	NM_198839;NM_198834	5'UTR;Body	chr17:35715796-35716627	S_Shore			NA			NA
cg07381930	-1.58996	3.18876e-06	0.000694281	-2.20364	8.53961e-11	7.21607e-09	37	10	99608915	F	GOLGA7B	NM_001010917	TSS1500	chr10:99609425-99610116	N_Shore			NA			NA
cg07382129	-2.90415	1.54488e-11	4.31511e-08	-2.92868	7.01244e-13	1.32271e-10	37	15	100249186	F	MEF2A;MEF2A;MEF2A;MEF2A	NM_005587;NM_001130926;NM_001130928;NM_001130927	Body;Body;Body;Body					TRUE			TRUE
cg07389922	-0.90005	2.89305e-05	0.00361791	-0.67334	0.00058414	0.00537463	37	17	7154007	R	DULLARD;C17orf81;DULLARD	NM_015343;NM_203415;NM_001143775	Body;TSS1500;Body	chr17:7154424-7156126	N_Shore		RDMR	NA			NA
cg07390924	-1.13809	2.56118e-06	0.000586775	-1.30511	1.79452e-08	6.82088e-07	37	1	901725	R	PLEKHN1;PLEKHN1	NM_032129;NM_001160184	TSS200;TSS200	chr1:894313-902654	Island			NA			NA
cg07394914	-1.84953	2.1763e-05	0.00293196	-4.32006	2.99068e-18	5.92045e-15	37	4	185371335	R	IRF2	NM_002199	5'UTR					TRUE			NA
cg07412186	-1.89808	4.7995e-07	0.000167001	-2.06979	8.22253e-09	3.48926e-07	37	6	16719376	R	ATXN1;ATXN1	NM_001128164;NM_000332	5'UTR;5'UTR					TRUE			NA
cg07421737	-1.76595	8.61704e-07	0.000259532	-3.0719	1.09164e-15	6.605e-13	37	11	67811641	R	TCIRG1;TCIRG1	NM_006053;NM_006019	Body;Body					NA	11:67811518-67811918	Gene_Associated_Cell_type_specific	NA
cg07422042	-2.14302	2.23493e-05	0.00300103	-2.91397	4.16092e-09	1.95107e-07	37	22	20194554	R	LOC150197	NR_026919	Body					NA	22:20193704-20194757	Promoter_Associated	NA
cg07422619	-0.803411	7.68138e-05	0.00736539	-0.737086	8.96286e-05	0.00107861	37	1	16405600	F								NA	1:16405346-16407221	Unclassified	TRUE
cg07441944	-2.72827	3.96762e-06	0.000818418	-5.04226	2.01811e-15	1.08561e-12	37	11	44623459	R	CD82;CD82	NM_001024844;NM_002231	Body;Body					TRUE	11:44623228-44623465	Unclassified_Cell_type_specific	NA
cg07447769	-2.68087	8.40576e-07	0.000254863	-2.69007	1.37496e-07	3.93272e-06	37	13	24723265	F								TRUE	13:24722992-24723704	Unclassified_Cell_type_specific	TRUE
cg07464206	2.23598	2.92213e-08	1.87074e-05	2.68784	9.77013e-12	1.17116e-09	37	11	15960015	R				chr11:15959855-15960077	Island			NA			NA
cg07470314	-1.47516	3.08613e-07	0.000119606	-1.27268	1.49012e-06	3.09517e-05	37	8	21766704	R	DOK2	NM_003974	3'UTR	chr8:21769694-21770080	N_Shelf			TRUE			TRUE
cg07471614	1.77668	2.67688e-06	0.000608158	1.40064	4.77427e-05	0.000627285	37	8	125855152	F								TRUE			NA
cg07492281	-2.22145	4.28525e-08	2.52827e-05	-2.96736	3.30269e-13	7.08124e-11	37	7	966947	R	ADAP1	NM_006869	Body	chr7:965987-966266	S_Shore			NA			NA
cg07495389	-1.88204	4.45062e-06	0.000891007	-2.49593	6.08962e-10	3.76212e-08	37	2	27233872	R	MAPRE3	NM_012326	5'UTR					TRUE			TRUE
cg07504977	-2.38337	6.69102e-09	5.68463e-06	-2.00333	8.84221e-08	2.68916e-06	37	10	102131012	R				chr10:102133021-102133557	N_Shelf			TRUE	10:102130480-102131154	Unclassified_Cell_type_specific	NA
cg07515565	2.26748	1.59741e-05	0.0023308	3.28245	3.49413e-10	2.37171e-08	37	6	1624386	F	GMDS	NM_001500	3'UTR	chr6:1624185-1625468	Island			NA			TRUE
cg07520919	-2.28185	1.17307e-07	5.51766e-05	-2.53393	8.32351e-10	4.90515e-08	37	6	160721435	R								TRUE			NA
cg07533239	-2.10546	4.57953e-09	4.21569e-06	-2.0417	1.2231e-09	6.81865e-08	37	12	6422131	R	PLEKHG6;PLEKHG6;PLEKHG6;PLEKHG6	NM_001144857;NM_001144856;NM_001144857;NM_018173	1stExon;Body;5'UTR;Body	chr12:6419603-6420024	S_Shelf			TRUE			TRUE
cg07540917	0.997939	2.48185e-05	0.00324837	0.882916	5.26815e-05	0.000681978	37	16	87742602	F	KLHDC4	NM_017566	Body	chr16:87742556-87743109	Island			NA			NA
cg07543967	-2.91762	4.77037e-05	0.00521268	-3.8278	3.90906e-08	1.33022e-06	37	19	49055443	R	SULT2B1;SULT2B1	NM_177973;NM_177973	1stExon;5'UTR					NA			NA
cg07546360	-3.71496	2.48312e-09	2.65781e-06	-4.1411	6.01579e-12	7.81294e-10	37	22	46482023	F	LOC400931	NR_027033	Body	chr22:46481815-46482024	Island			NA			NA
cg07546433	1.99609	6.24184e-06	0.00115022	3.02858	1.26981e-11	1.46571e-09	37	8	102063914	F								TRUE			TRUE
cg07549208	-1.22443	4.10302e-06	0.000839552	-1.07579	1.11426e-05	0.000177431	37	1	999888	F				chr1:999678-999911	Island			NA	1:998374-1000128	NonGene_Associated	NA
cg07558153	-1.18943	5.87247e-08	3.22555e-05	-1.07629	1.07091e-07	3.17986e-06	37	16	29302402	F	RUNDC2C	NR_002939	TSS200					TRUE			NA
cg07558734	-2.26476	1.23367e-05	0.00191682	-3.12918	9.40274e-10	5.44979e-08	37	15	45827540	R	C15orf21	NR_022014	Body					TRUE			NA
cg07593977	-1.91636	5.34219e-05	0.00565568	-4.05864	3.56011e-15	1.71814e-12	37	8	11735419	R								TRUE	8:11735292-11735891	Unclassified_Cell_type_specific	NA
cg07598407	1.27693	1.208e-05	0.00189243	1.10296	3.98003e-05	0.000536233	37	8	145048767	F	PLEC1;PLEC1	NM_000445;NM_201378	Body;TSS1500	chr8:145047293-145052305	Island			TRUE			TRUE
cg07603685	-1.75623	0.000113111	0.00971093	-1.88139	1.10363e-05	0.000175965	37	1	43158097	R	YBX1	NM_004559	Body					TRUE			NA
cg07633702	-1.61557	1.37462e-07	6.21483e-05	-2.99625	1.2259e-18	2.90656e-15	37	18	45612462	R								NA			NA
cg07645228	-2.90231	2.68294e-11	7.0805e-08	-3.17483	5.24033e-14	1.53743e-11	37	7	73867009	R	GTF2IRD1;GTF2IRD1	NM_005685;NM_016328	TSS1500;TSS1500	chr7:73867787-73868061	N_Shore			NA			NA
cg07650554	-1.12582	4.71398e-06	0.000930864	-1.04772	4.37506e-06	7.87468e-05	37	16	30457408	R	SEPHS2	NM_012248	TSS200	chr16:30456730-30457071	S_Shore			NA	16:30456132-30457563	Promoter_Associated	NA
cg07678594	-1.92331	3.87529e-07	0.000142375	-1.77089	4.5185e-07	1.10333e-05	37	17	39929383	F	JUP;JUP	NM_021991;NM_002230	5'UTR;5'UTR					TRUE			TRUE
cg07679492	1.1816	8.74166e-05	0.00805806	1.38374	1.3928e-06	2.91813e-05	37	16	85233194	R								NA			NA
cg07690692	-1.33497	0.000100352	0.00891203	-1.68519	3.30577e-07	8.42206e-06	37	16	30347078	F	LOC595101	NR_002453	TSS1500	chr16:30346052-30346865	S_Shore			NA			NA
cg07703079	1.86229	0.000108187	0.00939108	2.40481	2.20223e-07	5.93301e-06	37	11	430292	F	ANO9	NM_001012302	Body	chr11:430814-431775	N_Shore			NA			NA
cg07705639	-0.91447	8.94978e-05	0.00818882	-1.05874	1.8245e-06	3.68574e-05	37	1	174992861	R	MRPS14	NM_022100	TSS1500	chr1:174992365-174992796	S_Shore			NA	1:174991966-174993016	Promoter_Associated	NA
cg07709210	-2.23865	2.02442e-05	0.00278531	-3.16854	1.07511e-09	6.11262e-08	37	6	41715593	R	PGC;PGC	NM_001166424;NM_002630	TSS1500;TSS1500					TRUE			NA
cg07714812	1.47065	2.84641e-05	0.00357823	1.80024	9.97594e-08	2.98915e-06	37	6	1635611	F	GMDS	NM_001500	Body					NA			NA
cg07717632	-1.20081	1.45476e-05	0.0021723	-1.20985	3.08525e-06	5.82224e-05	37	9	140172631	R	C9orf167	NM_017723	5'UTR	chr9:140172613-140176105	Island			NA	9:140171561-140172976	Promoter_Associated	NA
cg07718903	-2.2979	1.83371e-08	1.27076e-05	-1.97393	1.2779e-07	3.69205e-06	37	20	6104261	F	FERMT1	NM_017671	TSS200	chr20:6103436-6103970	S_Shore	high-CpG:6051562-6052271		NA			TRUE
cg07719172	1.02681	1.06676e-05	0.00171855	0.987016	5.46514e-06	9.55583e-05	37	12	109889431	R	KCTD10	NM_031954	Body					TRUE			NA
cg07720334	0.865034	2.94722e-06	0.000653912	0.789826	3.97036e-06	7.24053e-05	37	2	25526752	R	DNMT3A;DNMT3A;DNMT3A	NM_022552;NM_175630;NM_175629	Body;Body;Body					TRUE			NA
cg07727358	1.81705	4.06792e-07	0.000147328	2.09886	1.25653e-09	6.96691e-08	37	4	1008738	R	FGFRL1;FGFRL1;FGFRL1	NM_001004358;NM_001004356;NM_021923	Body;Body;Body	chr4:1007037-1007288	S_Shore			NA			NA
cg07727594	-1.44355	6.10498e-05	0.00623031	-1.55622	4.54038e-06	8.13526e-05	37	20	45187423	F	SLC13A3;SLC13A3	NM_022829;NM_001011554	3'UTR;3'UTR					NA			TRUE
cg07727884	1.24088	5.25443e-05	0.0055918	1.00361	0.000355916	0.00352848	37	17	19290503	R	MFAP4	NM_002404	TSS200			low-CpG:19231076-19231098		TRUE	17:19290131-19290554	Unclassified_Cell_type_specific	TRUE
cg07734161	-2.31157	3.24783e-05	0.00391977	-1.65223	0.00105893	0.00887509	37	16	1593557	R	IFT140;TMEM204	NM_014714;NM_024600	Body;Body	chr16:1591813-1592107	S_Shore			NA	16:1593179-1594034	Promoter_Associated_Cell_type_specific	NA
cg07735586	-2.50315	1.71546e-07	7.46608e-05	-3.10885	3.70546e-11	3.57403e-09	37	3	57945651	R							DMR	TRUE			NA
cg07739369	-1.99792	6.66887e-06	0.00120871	-3.42898	1.40397e-13	3.46366e-11	37	17	80241456	F								TRUE			TRUE
cg07747256	1.56659	2.94275e-06	0.000653274	2.15165	1.00841e-10	8.29767e-09	37	6	22251202	R								TRUE			NA
cg07754940	-1.83155	4.38143e-07	0.000156049	-1.37888	2.53455e-05	0.000362297	37	10	89912729	F								TRUE			TRUE
cg07756483	-1.23148	3.55947e-05	0.00420622	-1.28245	4.5688e-06	8.179e-05	37	19	44281665	F	KCNN4	NM_002250	Body	chr19:44278273-44278777	S_Shelf			NA	19:44281133-44282315	Unclassified	TRUE
cg07775417	-3.94931	2.76558e-13	1.79018e-09	-3.8232	4.8669e-14	1.44671e-11	37	4	84469563	F	AGPAT9	NM_032717	Body					TRUE			TRUE
cg07796002	-2.19322	8.81233e-12	2.76439e-08	-1.4873	1.03424e-07	3.08354e-06	37	19	42392337	R	ARHGEF1;ARHGEF1;ARHGEF1	NM_004706;NM_199002;NM_198977	Body;Body;Body	chr19:42388144-42388723	S_Shelf			TRUE	19:42391096-42392517	Promoter_Associated	TRUE
cg07804621	-1.81567	1.39368e-05	0.00210656	-1.8507	2.32965e-06	4.55262e-05	37	5	107722229	F				chr5:107716309-107718301	S_Shelf			NA			NA
cg07805542	-3.44354	3.03013e-10	4.82695e-07	-3.8271	5.11031e-13	1.01907e-10	37	1	9779309	R	PIK3CD	NM_005026	Body	chr1:9775708-9775997	S_Shelf			TRUE	1:9778849-9780380	Promoter_Associated	TRUE
cg07807470	-1.28959	1.01139e-05	0.00165112	-1.23934	5.18743e-06	9.13132e-05	37	1	28837350	R	SNHG3-RCC1;SNHG3-RCC1;SNHG3-RCC1	NR_030725;NR_030726;NM_001048199	Body;Body;5'UTR					TRUE			NA
cg07807757	-3.63858	4.04186e-11	9.31236e-08	-2.71429	2.78801e-08	9.95415e-07	37	7	50894570	F								TRUE			TRUE
cg07817608	-1.84713	5.57179e-07	0.000186552	-1.99163	1.34733e-08	5.33546e-07	37	12	76219528	R								TRUE			NA
cg07824081	-1.85826	3.6135e-05	0.00425281	-2.44	2.42586e-08	8.84385e-07	37	16	30124904	R	GDPD3;LOC100271831	NM_024307;NR_027081	TSS200;TSS1500					NA			TRUE
cg07832950	0.895427	7.28787e-05	0.007105	1.14642	1.42772e-07	4.06501e-06	37	1	116907533	R								TRUE			NA
cg07835482	-1.81626	2.77735e-06	0.000625063	-1.6129	6.37171e-06	0.000109315	37	2	182656091	F								TRUE			NA
cg07857040	1.09808	8.77655e-05	0.00808365	1.08406	3.30814e-05	0.000456679	37	16	1582219	F	IFT140	NM_014714	Body	chr16:1583809-1584641	N_Shore			NA	16:1582161-1582500	Unclassified	NA
cg07858113	-2.73859	5.06402e-10	7.09666e-07	-3.01733	1.32708e-12	2.23042e-10	37	6	30711561	F	IER3;FLOT1	NM_003897;NM_005803	3'UTR;TSS1500	chr6:30710307-30712440	Island			NA	6:30710361-30712511	Promoter_Associated	NA
cg07858848	-1.54264	2.48379e-08	1.639e-05	-1.90637	2.86467e-12	4.21579e-10	37	2	43087177	R								TRUE			NA
cg07865607	-1.45013	0.000109395	0.0094737	-2.41669	1.87298e-10	1.40328e-08	37	19	3136076	F	GNA15	NM_002068	TSS200			low-CpG:3087026-3087083		NA	19:3135896-3136666	Promoter_Associated_Cell_type_specific	NA
cg07867517	-3.1848	2.80205e-05	0.00354231	-4.54205	1.53322e-09	8.25743e-08	37	16	75520165	R	CHST6	NM_021615	5'UTR					TRUE			NA
cg07869023	-2.66912	4.08468e-05	0.0046557	-4.1266	2.5934e-10	1.84449e-08	37	20	17212376	F	PCSK2	NM_002594	Body	chr20:17208550-17208756	S_Shelf			NA			NA
cg07875121	-1.97193	9.5062e-05	0.00855022	-2.53707	1.94694e-07	5.32188e-06	37	5	139641530	R	PFDN1	NM_002622	Body					TRUE	5:139641502-139641543	Unclassified_Cell_type_specific	TRUE
cg07880384	-0.958133	6.49531e-05	0.00650814	-0.7572	0.000558524	0.00517479	37	6	31913323	R	C2;C2;CFB	NM_000063;NM_001145903;NM_001710	3'UTR;3'UTR;TSS1500					TRUE			TRUE
cg07887168	-2.10111	3.22746e-06	0.000700463	-2.70818	8.80618e-10	5.15088e-08	37	16	4263893	F	SRL	NM_001098814	Body					TRUE			TRUE
cg07887608	1.08595	2.57023e-07	0.000103063	1.23947	9.85161e-10	5.67608e-08	37	12	109221600	R	SSH1;SSH1;SSH1	NM_001161330;NM_018984;NM_001161331	Body;Body;TSS1500					TRUE			NA
cg07891533	-1.36515	2.24359e-05	0.00300968	-1.56607	3.31714e-07	8.44567e-06	37	3	45209039	R							RDMR	TRUE	3:45208553-45209465	Unclassified_Cell_type_specific	TRUE
cg07893738	-1.74136	0.000102531	0.00905985	-1.89542	7.29512e-06	0.000123045	37	4	171150432	F								TRUE			NA
cg07902749	-2.38471	2.31329e-06	0.000543729	-1.8445	5.73534e-05	0.000733978	37	2	37813553	R							DMR	NA	2:37813133-37813679	Unclassified	NA
cg07912161	1.05273	4.61869e-06	0.000918342	1.23274	2.28952e-08	8.41604e-07	37	6	36929838	R	PI16	NM_153370	Body	chr6:36929837-36930135	Island			NA			NA
cg07915516	-1.94949	3.46608e-07	0.000131365	-1.60787	4.0753e-06	7.40211e-05	37	16	377344	R	AXIN1;AXIN1	NM_003502;NM_181050	Body;Body	chr16:374732-375328	S_Shelf			NA	16:377091-377936	Promoter_Associated	TRUE
cg07917978	-1.42774	4.87423e-07	0.000168738	-0.828087	0.000954804	0.00813498	37	16	21650166	F	METTL9;METTL9	NM_001077180;NM_016025	Body;Body					TRUE	16:21649627-21650314	Unclassified_Cell_type_specific	NA
cg07918509	-1.99298	9.23651e-05	0.00837041	-2.69538	5.4651e-08	1.77868e-06	37	17	62083407	R	ICAM2;ICAM2;ICAM2;ICAM2;ICAM2	NM_001099786;NM_000873;NM_001099788;NM_001099789;NM_001099787	Body;Body;Body;Body;Body					NA			TRUE
cg07932199	-1.29123	3.60265e-07	0.000135408	-1.09063	2.63653e-06	5.07404e-05	37	12	112008034	R	ATXN2	NM_002973	Body					TRUE			TRUE
cg07933720	-1.54089	6.5652e-06	0.00119523	-1.44307	5.41931e-06	9.48464e-05	37	4	77468187	R	SHROOM3	NM_020859	Body					TRUE			NA
cg07941953	0.702065	4.06245e-05	0.00464057	0.788507	1.17472e-06	2.51407e-05	37	20	10508668	R	C20orf94	NM_001009608	Body					NA			NA
cg07949217	-0.809682	9.85955e-06	0.00162258	-0.973954	3.29117e-08	1.14842e-06	37	9	124497981	F	DAB2IP	NM_032552	Body	chr9:124498513-124498962	N_Shore		RDMR	TRUE	9:124496781-124498103	Unclassified_Cell_type_specific	NA
cg07957995	-1.01869	4.56413e-06	0.000910205	-0.975938	2.38907e-06	4.65513e-05	37	1	224644750	F								TRUE	1:224644711-224646183	Unclassified	NA
cg07966265	1.62652	2.31665e-05	0.00308033	2.17367	7.21664e-09	3.12451e-07	37	1	10733477	R	CASZ1;CASZ1	NM_017766;NM_001079843	Body;Body					NA			NA
cg07966372	1.11988	2.47846e-05	0.00324575	1.53665	3.82685e-09	1.81276e-07	37	13	114878078	R	RASA3	NM_007368	Body	chr13:114879041-114879530	N_Shore			TRUE	13:114877948-114878638	Gene_Associated_Cell_type_specific	NA
cg07978099	-1.33618	2.60367e-05	0.003358	-1.4918	7.4235e-07	1.69361e-05	37	16	83986941	F	OSGIN1;OSGIN1;OSGIN1;OSGIN1	NM_182980;NM_182981;NM_013370;NM_182981	5'UTR;1stExon;Body;5'UTR					NA			NA
cg07979348	-1.69628	1.18844e-07	5.55791e-05	-1.04372	0.000224419	0.00237841	37	20	35198387	R				chr20:35201323-35203490	N_Shelf			NA			TRUE
cg07982740	-2.63379	3.52602e-07	0.000133141	-2.95016	2.59539e-09	1.29406e-07	37	20	44410114	R	WFDC3	NM_080614	Body					TRUE			TRUE
cg07985890	-3.22366	2.22607e-06	0.000530878	-4.18623	3.92538e-10	2.61055e-08	37	11	65190999	R	NEAT1	NR_028272	Body	chr11:65190824-65191058	Island		RDMR	NA	11:65188622-65191947	Promoter_Associated	NA
cg07986058	-1.93833	4.83052e-05	0.00525166	-2.92533	7.69782e-10	4.5888e-08	37	15	26094704	F	ATP10A	NM_024490	Body					TRUE	15:26094443-26094936	Promoter_Associated_Cell_type_specific	TRUE
cg07988171	-1.93521	1.87346e-05	0.00262726	-1.90435	6.43226e-06	0.000110247	37	19	16199419	F	TPM4;TPM4	NM_001145160;NM_003290	Body;Body				CDMR	NA			NA
cg07992385	-1.64558	1.15063e-07	5.41837e-05	-1.79533	1.38863e-09	7.59916e-08	37	2	169058521	F	STK39	NM_013233	Body					TRUE			NA
cg07992484	-1.16471	1.87416e-06	0.000469176	-1.60691	4.09203e-11	3.88171e-09	37	2	106724161	R	UXS1	NM_025076	Body					TRUE			TRUE
cg07994435	-1.66356	1.062e-06	0.000304991	-1.69923	1.16327e-07	3.40867e-06	37	17	70587467	F				chr17:70587771-70589080	N_Shore			TRUE			NA
cg07999953	-3.63004	3.404e-09	3.33693e-06	-3.9807	1.58634e-11	1.76319e-09	37	1	35249327	F	GJB3;GJB3	NM_001005752;NM_024009	5'UTR;5'UTR	chr1:35250418-35250736	N_Shore			NA			TRUE
cg08000118	-1.2877	1.95737e-05	0.00271504	-1.24518	9.31226e-06	0.00015199	37	8	144105709	F				chr8:144105675-144105879	Island			NA	8:144105204-144106301	Unclassified	TRUE
cg08005604	-0.838637	2.78609e-05	0.00353069	-0.647798	0.000385659	0.00377662	37	13	47128887	R	LRCH1;LRCH1;LRCH1	NM_015116;NM_001164213;NM_001164211	Body;Body;Body	chr13:47126970-47128706	S_Shore			NA	13:47128367-47129216	Promoter_Associated	NA
cg08026493	1.21759	4.63297e-06	0.000919753	1.38068	5.29262e-08	1.73151e-06	37	8	23430824	R				chr8:23429038-23429265	S_Shore			NA			NA
cg08035351	-0.801632	1.08076e-05	0.00173724	-0.85269	7.03457e-07	1.61609e-05	37	7	130005993	R	CPA5;CPA5;CPA5	NM_001127441;NM_001127442;NM_080385	Body;Body;Body					TRUE			TRUE
cg08047629	-1.3828	4.63014e-05	0.00509358	-1.26946	5.39186e-05	0.000695631	37	16	30125047	F	GDPD3;LOC100271831	NM_024307;NR_027081	TSS200;TSS1500					NA			TRUE
cg08069370	-0.871286	2.28507e-05	0.00304929	-0.911602	2.45675e-06	4.77172e-05	37	15	64387884	F	SNX1;SNX1;SNX1	NM_152826;NM_003099;NM_148955	TSS1500;TSS1500;TSS1500	chr15:64387985-64388628	N_Shore			NA	15:64387552-64388971	Promoter_Associated	NA
cg08074084	-0.533963	7.83721e-05	0.00747438	-0.599939	2.79257e-06	5.33305e-05	37	14	65880369	F	FUT8;FUT8;FUT8;FUT8;LOC645431	NM_178156;NM_178154;NM_004480;NM_178155;NR_024334	5'UTR;5'UTR;5'UTR;5'UTR;TSS1500	chr14:65878486-65880370	Island			NA			NA
cg08076807	-1.73062	2.10945e-05	0.00286461	-2.34189	4.33124e-09	2.01793e-07	37	17	80255910	R							RDMR	TRUE	17:80254738-80256955	Promoter_Associated	TRUE
cg08083757	0.714303	7.42333e-05	0.00718894	0.801447	2.67088e-06	5.12998e-05	37	11	133777831	R								NA			NA
cg08098980	1.1352	6.01219e-05	0.00616804	0.905153	0.000472526	0.00448939	37	15	81039989	R	FAM108C1	NM_021214	Body					TRUE			NA
cg08103568	-2.52011	2.71561e-05	0.00346724	-3.60186	1.35801e-09	7.45056e-08	37	4	100737138	F	DAPP1	NM_014395	TSS1500					NA			NA
cg08106792	-1.34531	8.40452e-05	0.00785194	-1.47822	4.73078e-06	8.43305e-05	37	1	153509323	R	S100A6	NM_014624	TSS1500	chr1:153508424-153508840	S_Shore			NA	1:153507457-153509370	Promoter_Associated	NA
cg08114533	-1.12142	0.000110187	0.00951196	-1.41646	3.77861e-07	9.46054e-06	37	11	67168528	F	PPP1CA;PPP1CA;PPP1CA	NM_001008709;NM_206873;NM_002708	Body;Body;Body	chr11:67168616-67169098	N_Shore			NA	11:67168258-67169974	Promoter_Associated	NA
cg08118034	-1.67821	1.29402e-08	9.40652e-06	-1.97389	7.14505e-12	8.99592e-10	37	22	29706595	F	GAS2L1;GAS2L1;GAS2L1	NM_152237;NM_006478;NM_152236	Body;Body;Body	chr22:29706500-29706710	Island			NA			NA
cg08133848	-3.95372	1.35996e-12	6.37468e-09	-3.65254	1.54894e-12	2.5297e-10	37	1	84719678	F								TRUE			TRUE
cg08136416	-1.49876	1.60242e-05	0.00233467	-1.77428	9.85513e-08	2.95708e-06	37	21	44060833	R							RDMR	TRUE			NA
cg08138505	-1.03838	1.13086e-05	0.00179934	-1.13282	4.24031e-07	1.04445e-05	37	11	67118746	R	LOC100130987	NR_024469	Body	chr11:67120856-67121228	N_Shelf			NA	11:67118656-67119064	Promoter_Associated	TRUE
cg08141142	1.91502	1.74393e-07	7.5577e-05	1.98631	9.76834e-09	4.04423e-07	37	14	105936715	F	MTA1	NM_004689	3'UTR	chr14:105936264-105936558	S_Shore			NA			NA
cg08141959	-2.68648	2.79561e-07	0.000110793	-1.78555	0.000127597	0.00146091	37	13	106809125	F								TRUE			TRUE
cg08146256	-1.91024	3.23707e-05	0.0039142	-1.4962	0.000363409	0.00359407	37	14	21734410	F	HNRNPC;HNRNPC;HNRNPC;HNRNPC	NM_031314;NM_001077442;NM_001077443;NM_004500	5'UTR;5'UTR;5'UTR;5'UTR	chr14:21737406-21738094	N_Shelf			NA			NA
cg08151612	-1.8844	5.40764e-06	0.00103213	-2.38778	3.23442e-09	1.56671e-07	37	19	49055438	R	SULT2B1;SULT2B1	NM_177973;NM_177973	1stExon;5'UTR					NA			NA
cg08155347	-2.02942	1.26742e-06	0.000350652	-2.79649	2.23357e-11	2.34757e-09	37	16	88704957	R	IL17C	NM_013278	TSS200	chr16:88706211-88706492	N_Shore			NA	16:88704759-88704971	Unclassified_Cell_type_specific	NA
cg08167085	-2.17028	1.15889e-06	0.000327739	-2.30303	4.98311e-08	1.64532e-06	37	12	123211133	F							DMR	NA			NA
cg08180187	-1.30102	7.26078e-06	0.00128181	-1.52838	3.93996e-08	1.33954e-06	37	4	24796689	F	SOD3	NM_003102	TSS1500					TRUE			TRUE
cg08186005	2.65037	4.1285e-10	6.12225e-07	1.90262	4.02727e-07	9.9917e-06	37	12	26662704	F	ITPR2	NM_002223	Body					TRUE			NA
cg08200419	-1.56929	5.22562e-08	2.9353e-05	-1.82743	6.39439e-11	5.66513e-09	37	10	134261480	R	C10orf91	NM_173541	Body					NA	10:134260247-134262214	Promoter_Associated_Cell_type_specific	TRUE
cg08200851	1.08188	1.49714e-05	0.00222139	1.17633	6.50974e-07	1.51196e-05	37	6	5472095	F	FARS2	NM_006567	Body					TRUE	6:5470984-5472133	Unclassified	NA
cg08202226	-1.88536	4.08146e-05	0.0046557	-3.21269	9.67139e-12	1.1624e-09	37	1	153896590	F	GATAD2B	NM_020699	TSS1500	chr1:153894837-153895921	S_Shore			NA			NA
cg08203210	-2.35829	3.54393e-06	0.000750871	-3.45683	1.51193e-11	1.69434e-09	37	6	26153217	F				chr6:26156449-26157146	N_Shelf			NA			NA
cg08207707	1.08271	1.45054e-05	0.00216998	1.07228	4.30167e-06	7.75835e-05	37	11	124630919	R	ESAM	NM_138961	Body	chr11:124632063-124633239	N_Shore		RDMR	NA			NA
cg08208899	2.13302	1.93614e-09	2.19323e-06	2.41168	2.62795e-12	3.92272e-10	37	2	181931215	F								TRUE			NA
cg08210507	1.14479	5.80061e-06	0.001088	1.05335	6.67296e-06	0.000113851	37	7	2109244	F	MAD1L1;MAD1L1;MAD1L1	NM_003550;NM_001013837;NM_001013836	Body;Body;Body	chr7:2107080-2107381	S_Shore			NA			TRUE
cg08219218	1.77243	2.24937e-05	0.00301546	2.56398	6.67533e-10	4.06667e-08	37	4	151503501	F	LRBA;MAB21L2;MAB21L2	NM_006726;NM_006439;NM_006439	Body;1stExon;5'UTR	chr4:151504011-151505085	N_Shore		RDMR	NA			NA
cg08222053	-1.42019	8.47257e-05	0.00789781	-1.59873	2.98295e-06	5.65637e-05	37	12	56113434	F	BLOC1S1;RDH5	NM_001487;NM_002905	3'UTR;TSS1500	chr12:56109798-56110298	S_Shelf			NA			NA
cg08224563	-2.15715	2.72525e-06	0.000617769	-3.4139	5.48785e-13	1.07698e-10	37	16	20916305	F	LYRM1;LYRM1;LYRM1	NM_001128301;NM_001128302;NM_020424	5'UTR;5'UTR;5'UTR	chr16:20911566-20912616	S_Shelf			NA	16:20915348-20916346	Unclassified_Cell_type_specific	NA
cg08225986	-1.33898	4.47262e-05	0.0049726	-0.987657	0.000933529	0.00798384	37	22	31737754	F	PATZ1;PATZ1;PATZ1;PATZ1	NM_014323;NM_032052;NM_032050;NM_032051	Body;Body;Body;Body	chr22:31741045-31743707	N_Shelf			TRUE			NA
cg08231577	1.35537	0.000104757	0.00918714	1.87605	3.76508e-08	1.288e-06	37	1	117077088	F	CD58;CD58;CD58	NM_001779;NR_026665;NM_001144822	Body;Body;Body	chr1:117077042-117077299	Island			NA			NA
cg08239753	-1.69132	9.32446e-05	0.00842578	-3.00608	1.47153e-11	1.65635e-09	37	14	23769690	F	PPP1R3E	NR_026862	Body	chr14:23770512-23771902	N_Shore			NA	14:23768914-23771359	Promoter_Associated	NA
cg08243401	-2.66285	1.41969e-06	0.000382654	-2.56325	6.3289e-07	1.47567e-05	37	13	22231844	R								TRUE			TRUE
cg08244262	-1.10374	4.12913e-05	0.00468524	-1.46885	2.11963e-08	7.87891e-07	37	21	42797939	R	MX1;MX1	NM_002462;NM_001144925	TSS200;5'UTR	chr21:42798146-42798884	N_Shore			TRUE	21:42797543-42799269	Promoter_Associated_Cell_type_specific	TRUE
cg08263398	1.1376	7.93355e-09	6.47067e-06	1.15413	5.5755e-10	3.48943e-08	37	19	17919173	F	B3GNT3	NM_014256	Body	chr19:17918737-17919098	S_Shore			NA	19:17918420-17919337	Unclassified_Cell_type_specific	NA
cg08263416	-1.72099	6.39723e-05	0.00643357	-2.41714	1.05463e-08	4.31722e-07	37	14	72720835	R	RGS6	NM_004296	Body					TRUE			NA
cg08264885	-1.15661	1.24615e-05	0.00193153	-1.0072	3.59201e-05	0.000490847	37	8	22103537	F	POLR3D;MIR320A	NM_001722;NR_029714	Body;TSS1500	chr8:22102303-22103142	S_Shore			NA	8:22103451-22103704	Promoter_Associated	NA
cg08267399	-1.38892	5.49487e-05	0.00577022	-1.34221	2.82662e-05	0.000398406	37	8	142349160	R	LOC731779	NR_024441	TSS1500					NA			TRUE
cg08271622	-1.39088	8.84032e-07	0.000264499	-1.66574	1.2183e-09	6.79788e-08	37	20	37053969	R	LOC388796;SNORA71B;LOC388796	NR_027241;NR_002910;NR_015366	Body;Body;Body					NA			NA
cg08279092	-1.47584	1.97434e-05	0.00273023	-1.46124	6.07328e-06	0.000104821	37	1	24071557	F	TCEB3	NM_003198	Body	chr1:24069695-24070615	S_Shore		RDMR	NA	1:24071165-24072416	Promoter_Associated	NA
cg08285033	0.897056	1.65284e-05	0.00238512	1.38885	4.10453e-11	3.89266e-09	37	22	31506825	F				chr22:31503236-31503871	S_Shelf			NA			NA
cg08292569	-1.41765	2.61401e-05	0.00336704	-1.7507	7.06202e-08	2.21865e-06	37	8	23078059	F	TNFRSF10A	NM_003844	Body	chr8:23081956-23082975	N_Shelf			NA	8:23077879-23078136	Unclassified_Cell_type_specific	NA
cg08302868	-0.762048	8.38136e-05	0.00783934	-0.733244	4.74536e-05	0.000623949	37	14	90977273	R								TRUE			NA
cg08305378	-2.1223	5.8136e-06	0.00108953	-1.3981	0.000884244	0.00762558	37	8	118953376	R	EXT1	NM_000127	Body					TRUE			NA
cg08306303	-2.98129	1.46941e-06	0.000391399	-3.98885	7.74244e-11	6.64996e-09	37	11	119567761	R	PVRL1;PVRL1;PVRL1	NM_002855;NM_203285;NM_203286	Body;Body;Body					TRUE	11:119567688-119567853	Unclassified_Cell_type_specific	NA
cg08315613	-1.37508	3.08838e-07	0.000119606	-2.48195	2.42759e-17	3.20861e-14	37	19	11074303	F	SMARCA4;SMARCA4;SMARCA4	NM_003072;NM_001128849;NM_001128844	5'UTR;5'UTR;5'UTR	chr19:11071116-11072340	S_Shore			NA	19:11074065-11074631	Promoter_Associated_Cell_type_specific	NA
cg08323299	-2.55641	4.52536e-06	0.000903308	-2.12002	3.2599e-05	0.000450965	37	13	80563028	R								TRUE			NA
cg08331313	1.8153	2.07852e-06	0.00050424	2.06318	1.72829e-08	6.60919e-07	37	5	151066460	R	SPARC;SPARC	NM_003118;NM_003118	1stExon;5'UTR					NA			TRUE
cg08337633	-1.53697	4.21562e-06	0.00085743	-1.22878	5.50038e-05	0.000707655	37	7	55602109	R	VOPP1	NM_030796	Body					TRUE	7:55602046-55602501	Promoter_Associated	TRUE
cg08374494	-1.34532	2.83872e-05	0.00357316	-1.00623	0.000577789	0.00532485	37	16	88551489	R	ZFPM1	NM_153813	Body	chr16:88554354-88554847	N_Shelf			NA			NA
cg08384314	-0.705583	1.54825e-06	0.000406594	-0.595158	9.68266e-06	0.000157203	37	6	30711680	R	IER3;FLOT1	NM_003897;NM_005803	3'UTR;TSS1500	chr6:30710307-30712440	Island			NA	6:30710361-30712511	Promoter_Associated	NA
cg08386009	-0.976462	1.59877e-05	0.00233106	-1.21821	2.58726e-08	9.34042e-07	37	6	32094845	F	ATF6B;ATF6B	NM_004381;NM_001136153	Body;Body	chr6:32097820-32098086	N_Shelf		RDMR	NA			NA
cg08387014	-2.91957	1.31898e-09	1.58201e-06	-3.31833	1.3359e-12	2.23914e-10	37	11	1848742	R				chr11:1847156-1847381	S_Shore			TRUE			NA
cg08388802	-1.88707	2.17817e-06	0.000523432	-2.0355	7.11331e-08	2.23259e-06	37	2	62638371	F								TRUE	2:62638232-62639635	Unclassified	NA
cg08391380	-2.70437	1.88766e-05	0.00263825	-2.04869	0.000368346	0.00363343	37	5	601208	R				chr5:602124-602553	N_Shore			NA			NA
cg08409167	-1.65252	7.8563e-06	0.00136507	-2.11665	4.21595e-09	1.97211e-07	37	15	64540691	F	CSNK1G1	NM_022048	Body					TRUE			NA
cg08412316	-2.6015	1.30996e-06	0.000359838	-2.86128	2.28612e-08	8.4043e-07	37	11	95658469	R	MTMR2;MTMR2;MTMR2;MTMR2	NM_201281;NM_201278;NR_023356;NM_016156	TSS1500;TSS1500;TSS1500;TSS1500	chr11:95656912-95657365	S_Shore			NA			NA
cg08416875	-0.954928	1.39453e-05	0.00210706	-0.671415	0.000729457	0.006487	37	6	119669226	R	MAN1A1	NM_005907	Body	chr6:119669589-119671424	N_Shore			NA			NA
cg08426733	-1.2102	3.03844e-06	0.000669054	-1.13118	2.57777e-06	4.97668e-05	37	1	1376740	R	VWA1;VWA1	NM_199121;NM_022834	3'UTR;3'UTR	chr1:1374461-1375584	S_Shore			TRUE	1:1375621-1377063	Unclassified	NA
cg08432204	-2.47267	3.49953e-05	0.00415767	-3.29427	1.56141e-08	6.0553e-07	37	6	126235516	F	NCOA7;NCOA7	NM_001122842;NM_181782	Body;Body					TRUE			NA
cg08432452	-1.64713	4.07181e-05	0.00464832	-1.18375	0.00116104	0.00959249	37	11	64658936	F	MIR192;MIR194-2	NR_029578;NR_029829	TSS1500;TSS200	chr11:64662462-64662880	N_Shelf			NA			NA
cg08438529	-2.73553	6.68903e-06	0.00121021	-3.05373	1.26337e-07	3.65655e-06	37	16	1052939	R				chr16:1056845-1057053	N_Shelf			TRUE	16:1052731-1054554	Unclassified_Cell_type_specific	TRUE
cg08446038	-4.08172	3.39048e-17	2.30442e-12	-4.01631	1.90797e-18	4.20583e-15	37	5	52327649	R	ITGA2	NM_002203	Body					TRUE	5:52327642-52327747	Unclassified_Cell_type_specific	NA
cg08447934	0.970673	6.56289e-07	0.000211784	1.06217	1.10237e-08	4.48072e-07	37	12	52311706	F	ACVRL1;ACVRL1	NM_000020;NM_001077401	Body;Body	chr12:52309034-52309337	S_Shelf			NA			NA
cg08453688	-0.636462	6.04793e-05	0.00619069	-0.777057	3.26858e-07	8.34079e-06	37	3	47323555	R	KIF9;KIF9;KLHL18;KIF9	NM_001134878;NM_022342;NM_025010;NM_182902	5'UTR;5'UTR;TSS1500;5'UTR	chr3:47323747-47324607	N_Shore			NA	3:47322706-47324950	Promoter_Associated	NA
cg08457178	-1.88339	6.00718e-08	3.27507e-05	-1.89034	7.27499e-09	3.14595e-07	37	6	30711636	R	IER3;FLOT1	NM_003897;NM_005803	3'UTR;TSS1500	chr6:30710307-30712440	Island			NA	6:30710361-30712511	Promoter_Associated	NA
cg08464003	-1.31381	4.38263e-05	0.00489927	-1.94946	1.06931e-09	6.08609e-08	37	5	139623012	F	C5orf32	NM_032412	3'UTR					NA			NA
cg08466082	-2.59683	7.47103e-06	0.00130889	-3.2743	6.09702e-09	2.69942e-07	37	16	88551422	R	ZFPM1	NM_153813	Body	chr16:88554354-88554847	N_Shelf			NA			NA
cg08469255	-1.79636	1.4276e-05	0.00214273	-2.0165	2.9843e-07	7.71479e-06	37	6	30851069	F	DDR1;DDR1	NM_001954;NM_013993	TSS1500;TSS1500	chr6:30852102-30852676	N_Shore			TRUE	6:30850910-30851224	Unclassified	NA
cg08472797	-2.25554	1.76997e-06	0.000450281	-2.60079	9.42266e-09	3.92182e-07	37	11	2925570	F	SLC22A18;SLC22A18;SLC22A18AS	NM_183233;NM_002555;NM_007105	Body;Body;TSS1500	chr11:2923301-2923817	S_Shore			TRUE			NA
cg08474826	-1.20518	1.93831e-05	0.00269227	-1.02179	8.06425e-05	0.000984592	37	1	1099630	F				chr1:1098043-1100584	Island			TRUE			NA
cg08482167	-2.30993	3.29778e-07	0.000126634	-2.1272	3.83734e-07	9.5858e-06	37	6	144066847	R	PHACTR2;PHACTR2;PHACTR2;PHACTR2	NM_001100164;NM_001100166;NM_014721;NM_001100165	Body;Body;Body;Body					TRUE			NA
cg08482307	-1.92398	5.30131e-06	0.00101641	-1.30096	0.000621328	0.00566288	37	5	14728684	R	ANKH	NM_054027	Body					TRUE			NA
cg08496523	1.42996	4.40231e-05	0.00491319	2.07893	1.98645e-09	1.03012e-07	37	11	61541027	R	C11orf9;C11orf9	NM_013279;NM_001127392	Body;Body	chr11:61544727-61545563	N_Shelf			NA			NA
cg08500112	-2.65657	1.90681e-10	3.24002e-07	-2.30645	1.46576e-09	7.9413e-08	37	5	59086432	R	PDE4D;PDE4D	NM_001165899;NM_001104631	Body;Body					TRUE			NA
cg08512078	0.585357	5.21912e-05	0.00556439	0.563257	2.87183e-05	0.000403857	37	11	32112369	R	RCN1	NM_002901	TSS200	chr11:32112394-32113277	N_Shore			NA	11:32112347-32113576	Promoter_Associated	TRUE
cg08525145	-1.16162	1.21686e-05	0.00189912	-1.28885	3.16934e-07	8.12312e-06	37	1	155911361	F	RXFP4	NM_181885	TSS200					TRUE			NA
cg08534055	-2.3319	1.42568e-05	0.00214064	-3.25222	9.07808e-10	5.2849e-08	37	16	9190392	R	C16orf72	NM_014117	Body	chr16:9184146-9186689	S_Shelf			NA			NA
cg08543028	-1.80949	6.89101e-05	0.00680432	-1.73364	4.13034e-05	0.000553904	37	12	31902503	F								TRUE	12:31901924-31902555	Unclassified	TRUE
cg08551619	-1.1072	3.5032e-06	0.000744848	-1.06361	1.71209e-06	3.48611e-05	37	3	100118960	R	LNP1;TOMM70A	NM_001085451;NM_014820	TSS1500;Body	chr3:100119504-100120857	N_Shore		RDMR	NA			NA
cg08553950	-1.36031	3.01038e-09	3.05384e-06	-1.46293	2.69676e-11	2.73706e-09	37	20	36012016	R	SRC;SRC	NM_198291;NM_005417	5'UTR;5'UTR	chr20:36012595-36013439	N_Shore	low-CpG:35445350-35445433		NA	20:36011903-36012034	Unclassified_Cell_type_specific	NA
cg08554554	-3.07549	9.85393e-08	4.7839e-05	-2.57428	1.02508e-06	2.23307e-05	37	20	62330618	F	ARFRP1;ARFRP1	NM_003224;NM_001134758	3'UTR;3'UTR	chr20:62328013-62328558	S_Shelf			TRUE	20:62330485-62330632	Unclassified	NA
cg08570346	-2.33554	8.97521e-07	0.000267162	-2.39047	9.13044e-08	2.76671e-06	37	5	82117656	R								TRUE			NA
cg08579420	-2.39841	8.07453e-05	0.00763642	-3.68687	1.22233e-09	6.81569e-08	37	17	31594469	F	ACCN1;ACCN1	NM_183377;NM_001094	Body;Body					TRUE			NA
cg08591265	-1.94498	2.2783e-06	0.000538295	-2.12119	5.70226e-08	1.84379e-06	37	17	56082867	F	SFRS1;SFRS1	NM_001078166;NM_006924	3'UTR;Body	chr17:56083750-56085373	N_Shore		RDMR	NA			NA
cg08599266	-0.62398	0.000103665	0.0091184	-0.562953	0.000152453	0.00170285	37	2	25142473	R	ADCY3	NM_004036	TSS1500	chr2:25142472-25143689	Island			NA	2:25142363-25142679	Unclassified	NA
cg08601192	1.01661	8.32699e-06	0.00143101	1.03657	1.28085e-06	2.71314e-05	37	10	131812878	F				chr10:131813042-131813277	N_Shore			NA			NA
cg08617982	-2.08651	1.32529e-06	0.000363702	-3.12497	1.17466e-12	2.0212e-10	37	13	114814680	F	RASA3	NM_007368	Body	chr13:114813942-114814457	S_Shore			NA	13:114814252-114815271	Promoter_Associated	NA
cg08640475	1.84083	1.65022e-10	2.90071e-07	1.69077	2.22553e-10	1.6152e-08	37	16	85551478	R				chr16:85551382-85551709	Island			NA			NA
cg08656837	-3.61078	2.95289e-07	0.000115789	-3.78704	1.33321e-08	5.28521e-07	37	7	155744544	R								TRUE			TRUE
cg08661164	-1.08085	2.98675e-05	0.00369805	-1.09945	5.82037e-06	0.000100994	37	1	93301669	F	RPL5;SNORD21	NM_000969;NR_000006	Body;TSS1500	chr1:93297498-93298122	S_Shelf			NA			NA
cg08663213	1.14533	5.10451e-06	0.000985624	1.27222	1.00516e-07	3.00916e-06	37	17	27411597	R	MYO18A;MYO18A	NM_078471;NM_203318	Body;Body	chr17:27406753-27408059	S_Shelf			TRUE			NA
cg08676812	-1.13872	2.49899e-05	0.00326425	-1.00215	5.75531e-05	0.000736072	37	11	65308423	R	LTBP3;LTBP3;LTBP3	NM_001164266;NM_021070;NM_001130144	Body;Body;Body	chr11:65305935-65308502	Island	high-CpG:65064674-65065044		TRUE	11:65307190-65309434	Promoter_Associated	NA
cg08679800	-1.92251	8.01213e-05	0.00758973	-3.27671	4.39828e-11	4.12805e-09	37	8	101912325	R							DMR	TRUE			TRUE
cg08681689	-1.04013	1.48212e-05	0.00220428	-0.828808	0.000157344	0.00174991	37	3	184034132	F	EIF4G1;EIF4G1;EIF4G1;EIF4G1	NM_198241;NM_198244;NM_182917;NM_198242	Body;5'UTR;Body;5'UTR	chr3:184032166-184033242	S_Shore		RDMR	NA	3:184033799-184034209	Promoter_Associated	NA
cg08682036	-1.47463	1.52848e-06	0.000403966	-1.70085	7.67638e-09	3.29002e-07	37	10	43898033	R	HNRNPF;HNRNPF;HNRNPF;HNRNPF	NM_001098205;NM_001098206;NM_001098204;NM_004966	5'UTR;5'UTR;5'UTR;5'UTR					TRUE			NA
cg08683263	-1.64153	0.000104493	0.00916798	-1.64704	3.08486e-05	0.000429915	37	16	30078162	R	ALDOA;ALDOA;ALDOA;ALDOA	NM_184043;NM_001127617;NM_184041;NM_000034	5'UTR;5'UTR;5'UTR;5'UTR	chr16:30076310-30077872	S_Shore			NA			NA
cg08687386	-1.47461	7.84517e-09	6.41141e-06	-1.80591	8.14691e-13	1.49386e-10	37	6	30711206	R	IER3;FLOT1	NM_003897;NM_005803	3'UTR;TSS1500	chr6:30710307-30712440	Island			NA	6:30710361-30712511	Promoter_Associated	NA
cg08688907	-1.52809	0.000116533	0.00993154	-1.92783	4.24074e-07	1.04445e-05	37	5	159890925	F								TRUE			NA
cg08692006	-0.951946	3.13337e-05	0.00382117	-1.3491	2.26058e-09	1.15062e-07	37	19	4639992	F	TNFAIP8L1;TNFAIP8L1	NM_001167942;NM_152362	TSS200;5'UTR	chr19:4639218-4639750	S_Shore			NA	19:4639981-4640048	Promoter_Associated	NA
cg08692676	-1.66634	6.97121e-06	0.0012447	-1.23932	0.000227348	0.00240507	37	6	134299594	R	TBPL1	NM_004865	5'UTR					TRUE	6:134299419-134299685	Unclassified_Cell_type_specific	NA
cg08701429	-3.30149	3.55228e-10	5.4256e-07	-4.26722	1.20197e-15	7.1444e-13	37	17	15394553	F								TRUE			TRUE
cg08702915	-1.74561	6.94939e-06	0.00124189	-2.1099	1.75096e-08	6.67959e-07	37	1	76253688	F	RABGGTB;SNORD45B	NM_004582;NR_002748	Body;TSS1500					NA			NA
cg08715862	-2.13205	0.000100564	0.00892108	-2.58502	8.1486e-07	1.83542e-05	37	16	67275028	F	FHOD1	NM_013241	Body	chr16:67270859-67271295	S_Shelf			TRUE			TRUE
cg08723318	-1.32097	9.5805e-05	0.00860375	-1.40366	1.03964e-05	0.00016716	37	10	122723063	R								TRUE			NA
cg08742502	-1.4733	5.74421e-06	0.00108149	-1.04418	0.000370378	0.00365037	37	6	106546754	F	PRDM1;PRDM1	NM_001198;NM_182907	Body;TSS200					TRUE	6:106546552-106546871	Promoter_Associated_Cell_type_specific	NA
cg08752433	-3.05293	7.068e-07	0.000224658	-4.63417	2.25005e-13	5.10618e-11	37	12	111016566	R	PPTC7	NM_139283	Body	chr12:111020507-111021192	N_Shelf			NA			NA
cg08754067	-1.56306	1.65055e-05	0.00238435	-1.26894	0.000132181	0.00150628	37	5	40833236	R	SNORD72;RPL37	NR_002583;NM_000997	TSS1500;Body	chr5:40835241-40835873	N_Shelf			NA			NA
cg08755026	-2.65538	7.79957e-07	0.000240234	-3.37231	1.61781e-10	1.24246e-08	37	2	85819614	R	VAMP5	NM_006634	Body	chr2:85822404-85822983	N_Shelf			NA			NA
cg08759026	-1.82465	1.71607e-06	0.000438484	-2.67114	4.35017e-12	6.00597e-10	37	11	69061454	R	MYEOV	NM_138768	TSS200					TRUE			TRUE
cg08766762	-2.42768	4.33682e-08	2.5389e-05	-1.90398	2.01575e-06	4.01892e-05	37	6	37521698	R								TRUE	6:37521003-37521749	Unclassified	TRUE
cg08782899	-2.22883	4.08074e-06	0.000836253	-1.63155	0.000192669	0.00208588	37	17	79652389	R	ARL16;HGS	NM_001040025;NM_004712	TSS1500;Body	chr17:79650194-79651447	S_Shore			NA			NA
cg08783934	-1.21284	3.14277e-05	0.00383035	-1.37813	6.48411e-07	1.50738e-05	37	8	18523840	R	PSD3;PSD3	NM_206909;NM_015310	Body;Body					TRUE			NA
cg08790319	-1.24361	3.08061e-05	0.00377383	-1.14989	3.21333e-05	0.000445414	37	16	2203008	R	RAB26	NM_014353	Body	chr16:2205207-2205902	N_Shelf			NA			TRUE
cg08795949	1.90748	1.6947e-07	7.39235e-05	1.99506	7.4974e-09	3.22722e-07	37	6	166419138	R				chr6:166421891-166422241	N_Shelf			NA			TRUE
cg08800893	-2.03084	2.86433e-05	0.003593	-1.75279	8.74353e-05	0.00105571	37	22	36727569	F	MYH9	NM_002473	Body				DMR	NA	22:36727411-36729627	Promoter_Associated	TRUE
cg08817867	-2.74868	2.34937e-05	0.00310965	-4.36881	3.38715e-11	3.31166e-09	37	17	19656554	F								TRUE			TRUE
cg08818798	0.951192	5.68743e-05	0.00592126	0.928214	2.49471e-05	0.000357317	37	8	145848921	R				chr8:145849885-145851998	N_Shore			NA			NA
cg08826152	-2.17069	4.84632e-12	1.70375e-08	-2.16671	2.96636e-13	6.45171e-11	37	17	15869607	R	ADORA2B	NM_000676	Body					TRUE	17:15869502-15869990	Unclassified_Cell_type_specific	NA
cg08827700	-2.00614	8.93401e-05	0.00818173	-2.39798	9.3063e-07	2.0561e-05	37	11	2925969	R	SLC22A18;SLC22A18;SLC22A18AS	NM_183233;NM_002555;NM_007105	Body;Body;TSS1500	chr11:2923301-2923817	S_Shelf			NA			NA
cg08830105	-2.22711	1.40788e-06	0.000380701	-2.37849	5.35908e-08	1.75036e-06	37	16	524414	R	RAB11FIP3;RAB11FIP3	NM_014700;NM_001142272	Body;TSS1500					NA			NA
cg08830565	1.20436	9.16986e-05	0.00833109	1.12182	8.54536e-05	0.00103493	37	7	129417405	F				chr7:129418286-129422509	N_Shore		RDMR	NA	7:129417070-129417463	Unclassified_Cell_type_specific	NA
cg08832018	-2.28257	1.00918e-05	0.00164948	-2.99676	3.07405e-09	1.50079e-07	37	3	156543647	R	LEKR1	NM_001004316	TSS1500	chr3:156543891-156544405	N_Shore		CDMR	NA	3:156543091-156545015	Promoter_Associated	TRUE
cg08836542	-1.46652	1.35872e-06	0.000370274	-1.03526	0.000149902	0.00167835	37	2	28618831	R	FOSL2	NM_005253	Body	chr2:28612964-28616748	S_Shelf		RDMR	NA	2:28617440-28618889	Promoter_Associated	NA
cg08836954	-2.20447	1.35923e-06	0.000370274	-2.57894	4.3912e-09	2.04144e-07	37	5	179235209	R	SQSTM1;SQSTM1;MGAT4B	NM_001142298;NM_001142299;NM_014275	5'UTR;5'UTR;TSS1500	chr5:179232532-179234595	S_Shore			NA			NA
cg08844698	-1.41187	9.12322e-06	0.00152961	-1.46155	1.03318e-06	2.24753e-05	37	16	85185607	R								TRUE	16:85185346-85185637	Unclassified_Cell_type_specific	NA
cg08856163	-2.03144	2.91416e-05	0.00363316	-1.56983	0.000396843	0.00387153	37	5	16937379	R	MYO10	NM_012334	TSS1500	chr5:16935555-16936408	S_Shore			NA			NA
cg08862203	-0.789923	3.67491e-05	0.00430151	-0.689418	9.29343e-05	0.0011133	37	16	87350553	R				chr16:87350634-87351570	N_Shore			NA	16:87350072-87351874	Promoter_Associated	NA
cg08866665	-2.67923	1.86162e-06	0.000467474	-3.28192	1.78913e-09	9.40904e-08	37	6	169689892	R								NA			NA
cg08881019	-2.20894	1.13614e-10	2.11562e-07	-1.9014	1.17771e-09	6.60714e-08	37	1	156096178	F	LMNA;LMNA;LMNA	NM_005572;NM_170707;NM_170708	Body;Body;Body					NA	1:156096056-156096312	Unclassified_Cell_type_specific	TRUE
cg08881175	-1.47771	0.00010618	0.00927743	-1.24874	0.000369601	0.00364386	37	10	130832393	F								NA			NA
cg08895260	-1.26801	9.00669e-05	0.00822797	-1.48269	1.49941e-06	3.1121e-05	37	11	82756563	R	RAB30	NM_014488	5'UTR					TRUE			NA
cg08899105	-2.08167	3.08424e-09	3.12101e-06	-2.66791	3.63819e-14	1.14835e-11	37	15	93450671	F	CHD2;CHD2	NM_001271;NM_001042572	Body;Body	chr15:93447556-93447823	S_Shelf			TRUE			NA
cg08915615	-1.37929	8.87059e-05	0.00813462	-1.73277	3.04319e-07	7.84466e-06	37	1	27817311	R	WASF2	NM_006990	TSS1500	chr1:27816342-27816853	S_Shore			NA	1:27816080-27817320	Promoter_Associated	NA
cg08918658	-1.79945	2.0529e-05	0.00281595	-3.55467	5.66698e-15	2.52019e-12	37	6	158447883	F	SYNJ2	NM_003898	Body			low-CpG:158367825-158368129		TRUE	6:158447128-158448536	Promoter_Associated	TRUE
cg08922729	-1.62186	7.03135e-06	0.00125379	-1.21368	0.000210699	0.00225303	37	1	21913557	R								TRUE			NA
cg08928696	-3.21701	5.61606e-08	3.11176e-05	-4.14399	1.98176e-12	3.10954e-10	37	1	225632889	F								NA	1:225632476-225633091	Promoter_Associated	TRUE
cg08942191	-3.10645	3.82062e-07	0.000141129	-4.31384	2.36343e-12	3.60035e-10	37	15	80729093	R	ARNT2	NM_014862	Body					TRUE			TRUE
cg08945443	0.961191	9.65831e-07	0.000282952	1.31396	1.88946e-11	2.04168e-09	37	10	75193254	R	ZMYND17	NM_001024593	5'UTR					NA			NA
cg08962271	-1.14445	3.63464e-06	0.000766006	-1.13529	9.05157e-07	2.00984e-05	37	11	67273496	R	PITPNM1;PITPNM1	NM_004910;NM_001130848	TSS1500;TSS1500	chr11:67275067-67276431	N_Shore			NA	11:67273463-67273920	Promoter_Associated	NA
cg08986840	-2.80448	7.73205e-10	9.97835e-07	-2.23505	5.32375e-08	1.74032e-06	37	8	38409865	R								TRUE			TRUE
cg09007236	-1.78323	1.70752e-08	1.19032e-05	-1.64879	1.83128e-08	6.93926e-07	37	17	78228820	R								TRUE	17:78228651-78228913	Unclassified_Cell_type_specific	TRUE
cg09017001	-1.64472	4.38473e-05	0.00489942	-1.4534	9.10845e-05	0.00109387	37	1	31870508	R								TRUE			NA
cg09017941	-1.38047	3.28273e-05	0.003949	-1.91569	4.51538e-09	2.0913e-07	37	1	229163577	F							DMR	NA	1:229163377-229163630	Unclassified_Cell_type_specific	NA
cg09018299	-3.21291	1.46144e-05	0.00218068	-4.54486	6.1358e-10	3.78706e-08	37	16	24748339	F	TNRC6A	NM_014494	Body					TRUE			NA
cg09021817	1.65003	1.24955e-05	0.00193482	1.81767	3.8634e-07	9.64383e-06	37	17	1799727	R	RPA1	NM_002945	Body	chr17:1799541-1799756	Island			NA			NA
cg09026722	-3.51648	1.73763e-06	0.000442883	-3.03755	6.93217e-06	0.000117658	37	1	156867080	F	PEAR1	NM_001080471	5'UTR	chr1:156863415-156863711	S_Shelf			TRUE			TRUE
cg09029085	-2.52345	3.36995e-05	0.00402961	-3.15258	7.7801e-08	2.40908e-06	37	17	47094198	F	IGF2BP1;IGF2BP1	NM_006546;NM_001160423	Body;Body	chr17:47091973-47092211	S_Shore		RDMR	NA			TRUE
cg09029902	-2.86091	1.56614e-05	0.00229658	-3.24462	2.66117e-07	6.99025e-06	37	20	52199594	R	ZNF217;ZNF217	NM_006526;NM_006526	5'UTR;1stExon	chr20:52198058-52198400	S_Shore			NA			NA
cg09033006	-1.46333	3.80263e-10	5.72381e-07	-1.2745	2.53003e-09	1.26751e-07	37	1	244517177	R	C1orf100	NM_001012970	5'UTR					TRUE			TRUE
cg09043214	-1.47749	8.54193e-06	0.00145507	-1.39006	6.49941e-06	0.0001113	37	12	6442873	F	TNFRSF1A	NM_001065	Body	chr12:6438272-6438931	S_Shelf	low-CpG:6312749-6313660		NA			TRUE
cg09049982	-1.41287	4.74924e-05	0.00519517	-1.26846	7.76265e-05	0.000952817	37	20	32950073	F	ITCH	NM_031483	TSS1500	chr20:32950984-32951969	N_Shore			NA	20:32950051-32950210	Unclassified_Cell_type_specific	NA
cg09067465	-1.66941	2.45708e-08	1.62928e-05	-1.97099	1.4627e-11	1.64869e-09	37	16	56965519	R	HERPUD1;HERPUD1;HERPUD1	NM_001010990;NM_014685;NM_001010989	TSS1500;TSS1500;TSS1500	chr16:56965734-56966476	N_Shore			NA	16:56965152-56967142	Promoter_Associated	NA
cg09067506	-1.8455	1.10638e-05	0.00177075	-1.90493	1.3764e-06	2.88974e-05	37	11	69065869	R							DMR	NA			TRUE
cg09070415	-3.66441	2.61057e-15	6.26236e-11	-3.45908	1.17824e-15	7.05566e-13	37	1	32041052	R	TINAGL1	NM_022164	TSS1500					NA			NA
cg09075968	-3.12168	2.52787e-12	1.01066e-08	-2.41693	1.07973e-09	6.13259e-08	37	13	113841799	F	PCID2;PCID2;PCID2	NM_001127203;NM_018386;NM_001127202	Body;Body;Body					TRUE			TRUE
cg09080114	-0.876797	5.50213e-05	0.00577365	-0.882308	1.42172e-05	0.000219241	37	12	6983111	R	SPSB2;SPSB2	NM_001146316;NM_032641	TSS1500;TSS1500	chr12:6982319-6982936	S_Shore			NA	12:6981244-6983197	Unclassified	NA
cg09080522	-1.47245	1.05532e-05	0.00170576	-1.37927	8.74063e-06	0.000143839	37	22	44568387	F	PARVG;PARVG	NR_024427;NM_001137605	TSS1500;TSS1500					TRUE	22:44568196-44568614	Unclassified_Cell_type_specific	NA
cg09082823	-1.68386	5.68987e-05	0.00592229	-1.82301	3.82859e-06	7.01525e-05	37	11	17564696	F	USH1C;USH1C	NM_153676;NM_005709	Body;Body	chr11:17565766-17566052	N_Shore		RDMR	NA			NA
cg09101941	-1.72982	5.56107e-06	0.00105529	-1.93906	8.97545e-08	2.72412e-06	37	5	133775258	R								TRUE			TRUE
cg09106231	-1.95178	4.5254e-05	0.00501352	-3.83764	5.20119e-14	1.52925e-11	37	1	207455715	R								TRUE			NA
cg09109520	2.05652	2.08252e-05	0.00284318	2.15108	2.21127e-06	4.35321e-05	37	16	57673258	R	GPR56;GPR56;GPR56;GPR56;GPR56;GPR56;GPR56;GPR56;GPR56	NM_001145773;NM_001145774;NM_005682;NM_001145771;NM_201525;NM_001145774;NM_201524;NM_001145772;NM_001145770	5'UTR;5'UTR;5'UTR;5'UTR;5'UTR;1stExon;5'UTR;5'UTR;5'UTR					NA			NA
cg09115713	-2.8188	1.05697e-06	0.000304191	-2.13937	4.2719e-05	0.000570227	37	16	88832476	R	FAM38A	NM_001142864	Body					NA			NA
cg09119494	-2.11682	7.23802e-09	6.08417e-06	-2.34016	3.01303e-11	2.98814e-09	37	1	23851471	F	E2F2	NM_004091	Body					TRUE	1:23851215-23852066	Unclassified	NA
cg09120877	-2.25142	9.30943e-07	0.000274705	-2.56638	5.53091e-09	2.4868e-07	37	1	147721261	R				chr1:147718156-147718915	S_Shelf			NA	1:147721204-147721453	Unclassified_Cell_type_specific	NA
cg09123625	-0.744577	0.000109755	0.00949074	-0.678417	0.000140345	0.00158598	37	16	2097210	F	TSC2;NTHL1;TSC2;TSC2	NM_001077183;NM_002528;NM_000548;NM_001114382	TSS1500;Body;TSS1500;TSS1500	chr16:2097465-2098365	N_Shore			NA	16:2097144-2098704	Promoter_Associated	NA
cg09126279	-2.46883	8.46195e-08	4.23933e-05	-1.84712	8.37634e-06	0.000138633	37	4	40675171	F								TRUE	4:40674903-40675429	Promoter_Associated	TRUE
cg09129067	-2.57857	0.000117902	0.00999961	-2.00941	0.00103564	0.00870963	37	8	103750904	R				chr8:103750881-103751088	Island			NA	8:103750815-103751112	Unclassified_Cell_type_specific	TRUE
cg09135529	-1.35075	9.12578e-06	0.00152961	-1.15688	3.54995e-05	0.000485768	37	11	62448703	F				chr11:62446038-62446613	S_Shelf			NA	11:62448252-62448753	Unclassified	TRUE
cg09149118	-1.50639	5.78396e-06	0.00108548	-1.89581	4.35959e-09	2.02916e-07	37	2	187463618	F	ITGAV;ITGAV;ITGAV	NM_001144999;NM_001145000;NM_002210	TSS1500;Body;Body					NA			NA
cg09152089	-1.86468	2.19784e-06	0.00052599	-1.37504	0.000112476	0.00131176	37	1	24469564	R	IL22RA1	NM_021258	1stExon					TRUE			TRUE
cg09171562	-1.42372	5.73279e-05	0.00595329	-2.14476	1.13798e-09	6.41428e-08	37	17	17011443	F	MPRIP;MPRIP	NM_015134;NM_201274	Body;Body					TRUE			NA
cg09177080	-2.2785	1.70526e-08	1.19032e-05	-3.07595	5.31986e-14	1.55964e-11	37	17	73840822	R	UNC13D	NM_199242	TSS200					TRUE	17:73840593-73840831	Promoter_Associated	NA
cg09178385	-1.76078	4.55701e-07	0.000160481	-1.67013	2.6995e-07	7.07498e-06	37	1	35246759	R	GJB3;GJB3	NM_024009;NM_001005752	TSS200;TSS1500	chr1:35246876-35247599	N_Shore			NA			TRUE
cg09182900	0.723117	1.93285e-05	0.00268758	0.729484	4.15109e-06	7.52101e-05	37	6	43909955	R								TRUE			NA
cg09185386	-1.11764	1.5954e-07	7.04886e-05	-1.28496	4.21188e-10	2.76634e-08	37	1	94018978	F	FNBP1L;FNBP1L;FNBP1L	NM_001024948;NM_017737;NM_001164473	3'UTR;3'UTR;3'UTR					NA			NA
cg09187338	-2.19663	2.96162e-07	0.000116019	-2.84857	1.86361e-11	2.01749e-09	37	7	130588508	R								TRUE			NA
cg09187505	1.55232	6.35599e-07	0.000207194	1.37653	1.64026e-06	3.36031e-05	37	6	106434429	R				chr6:106433984-106434459	Island		RDMR	TRUE			NA
cg09191706	0.962647	1.01108e-05	0.00165112	0.935057	4.22689e-06	7.64104e-05	37	11	9556090	R								TRUE			NA
cg09195271	-2.45174	1.74301e-05	0.00248621	-3.2208	7.30211e-09	3.15615e-07	37	1	20142497	R	RNF186	NM_019062	TSS1500					NA			NA
cg09199609	0.726871	3.43828e-05	0.00409625	0.895227	1.13962e-07	3.35069e-06	37	5	172447063	F	SNORA74B;ATP6V0E1	NR_002988;NM_003945	TSS1500;Body					NA			NA
cg09219813	-1.92922	7.21216e-08	3.7707e-05	-1.86691	2.39186e-08	8.74088e-07	37	3	152017017	F	MBNL1;MBNL1;MBNL1;MBNL1;MBNL1;MBNL1;MBNL1	NM_207293;NM_207296;NM_021038;NM_207297;NM_207292;NM_207295;NM_207294	TSS200;TSS200;5'UTR;TSS200;5'UTR;TSS200;TSS200					TRUE			NA
cg09231675	-2.30738	3.01933e-05	0.00372689	-3.14174	6.68445e-09	2.92139e-07	37	17	79523642	R				chr17:79518816-79519844	S_Shelf			NA	17:79523544-79523808	Gene_Associated	NA
cg09234161	-0.702062	6.27319e-06	0.00115392	-1.09034	5.56516e-12	7.31152e-10	37	16	57565147	R	CCDC102A	NM_033212	5'UTR	chr16:57562451-57563325	S_Shore			TRUE			NA
cg09235583	-0.676088	0.00011479	0.0098241	-0.652976	6.25341e-05	0.000790186	37	6	30711141	F	IER3;FLOT1	NM_003897;NM_005803	3'UTR;TSS1500	chr6:30710307-30712440	Island			NA	6:30710361-30712511	Promoter_Associated	NA
cg09238666	-1.45517	5.39914e-05	0.00570412	-1.72757	5.21323e-07	1.24929e-05	37	16	66584358	F	TK2	NM_004614	TSS200	chr16:66586268-66586719	N_Shore			NA	16:66582521-66584366	Promoter_Associated	TRUE
cg09250149	1.24933	1.80926e-06	0.00045799	1.02908	1.68414e-05	0.000254126	37	16	85684353	R	KIAA0182;KIAA0182	NM_001134473;NM_014615	Body;Body	chr16:85684107-85684491	Island			TRUE			NA
cg09251508	-0.814865	3.99551e-05	0.00458944	-1.39651	7.51631e-12	9.39663e-10	37	3	49573805	F				chr3:49577247-49577531	N_Shelf			TRUE			NA
cg09253696	-1.66389	7.35431e-05	0.0071516	-1.94403	1.14564e-06	2.46061e-05	37	17	73873529	F	TRIM47	NM_033452	Body	chr17:73873528-73874923	Island			TRUE			NA
cg09263116	1.43891	1.06508e-05	0.00171745	1.81384	1.05501e-08	4.31834e-07	37	22	43505892	R	BIK	NM_001197	TSS1500	chr22:43505951-43506167	N_Shore			NA			NA
cg09272256	-2.22642	3.77985e-05	0.00439895	-2.69711	1.95176e-07	5.33397e-06	37	10	5238881	R	AKR1C4	NM_001818	1stExon					NA			NA
cg09274826	-0.980634	8.46925e-06	0.00144752	-0.995946	1.41851e-06	2.96548e-05	37	1	156718357	R	HDGF;HDGF;HDGF	NM_001126050;NM_001126051;NM_004494	Body;Body;Body	chr1:156720747-156722069	N_Shelf		RDMR	NA			NA
cg09285525	-2.00291	5.02262e-05	0.00541147	-3.58896	2.50952e-12	3.78429e-10	37	16	87869786	F	SLC7A5	NM_003486	Body					NA	16:87869555-87869906	Unclassified_Cell_type_specific	NA
cg09290175	-3.69779	5.07747e-08	2.87985e-05	-4.46353	1.79691e-11	1.9567e-09	37	22	39688265	F				chr22:39688128-39688349	Island			NA			NA
cg09293816	-1.42666	4.67409e-08	2.68845e-05	-1.4066	9.07543e-09	3.80409e-07	37	19	50015532	F	FCGRT;FCGRT	NM_001136019;NM_004107	TSS200;TSS1500	chr19:50016531-50016851	N_Shore			NA			TRUE
cg09303236	-1.90408	1.2424e-08	9.14538e-06	-1.71309	2.76645e-08	9.88835e-07	37	17	38657915	R	TNS4	NM_032865	TSS200					NA			NA
cg09305503	1.08434	4.01882e-05	0.00460492	1.29286	3.09288e-07	7.95314e-06	37	17	9088206	R	NTN1	NM_004822	Body					TRUE			NA
cg09308580	-1.55223	2.47935e-06	0.000572854	-1.07309	0.00029382	0.002998	37	2	43405947	R								TRUE			TRUE
cg09317928	1.03492	8.24823e-06	0.00142107	1.32771	4.34487e-09	2.02313e-07	37	11	61716830	R	BEST1;BEST1	NM_001139443;NM_004183	TSS1500;TSS1500					TRUE			NA
cg09328012	-2.85709	4.28105e-09	4.0134e-06	-2.45766	3.29976e-08	1.15112e-06	37	22	46481677	R	LOC400931	NR_027033	TSS200	chr22:46481815-46482024	N_Shore			NA			TRUE
cg09349409	-1.61828	5.01301e-05	0.00540541	-1.35321	0.000222356	0.00236029	37	11	64658765	F	MIR192	NR_029578	TSS200	chr11:64662462-64662880	N_Shelf			NA			NA
cg09354692	-2.54238	7.66136e-08	3.95485e-05	-2.82867	4.59111e-10	2.97328e-08	37	6	160122650	F								TRUE			TRUE
cg09356442	-2.60717	5.96601e-05	0.006133	-4.2737	8.47412e-11	7.1667e-09	37	16	20901591	F	DCUN1D3	NM_173475	5'UTR					TRUE			NA
cg09358725	1.2858	3.76611e-06	0.000785702	0.887129	0.000393532	0.00384365	37	11	33914088	R	LMO2	NM_005574	TSS1500					NA			NA
cg09363892	-1.61729	6.0839e-08	3.30805e-05	-1.64561	5.01877e-09	2.29037e-07	37	1	954619	F	AGRN	NM_198576	TSS1500	chr1:954768-956343	N_Shore			NA			NA
cg09373676	-2.40984	1.78259e-06	0.000452646	-1.57224	0.000493829	0.00466051	37	4	186227243	R	SNX25	NM_031953	Body					TRUE			TRUE
cg09385936	-2.41381	3.24565e-05	0.00391977	-4.3925	4.96334e-13	9.93653e-11	37	14	100791876	R	C14orf68	NM_207117	Body	chr14:100795072-100795376	N_Shelf			NA			NA
cg09386050	1.28826	7.45472e-05	0.00720736	1.60614	2.77008e-07	7.22976e-06	37	7	809078	R	HEATR2	NM_017802	Body	chr7:807336-808261	S_Shore			NA			TRUE
cg09390594	-2.02159	3.18705e-10	4.99882e-07	-1.81461	8.6947e-10	5.09337e-08	37	14	62028791	F								TRUE	14:62028091-62028942	Unclassified_Cell_type_specific	TRUE
cg09394306	-2.65153	1.8625e-08	1.28517e-05	-3.57816	6.17998e-14	1.76239e-11	37	2	20330742	F								TRUE	2:20330733-20330818	Unclassified_Cell_type_specific	NA
cg09396865	-2.12243	4.24306e-06	0.000860863	-2.59812	6.03804e-09	2.67704e-07	37	2	201568315	F								TRUE	2:201568040-201568406	Unclassified_Cell_type_specific	NA
cg09398856	-2.68243	2.86815e-05	0.0035963	-4.23636	6.31902e-11	5.60322e-09	37	2	235789476	F								TRUE			TRUE
cg09404376	-2.22879	9.55671e-07	0.000280783	-2.71578	8.04307e-10	4.76466e-08	37	6	134499189	R	SGK1;SGK1	NM_001143677;NM_001143676	TSS200;Body	chr6:134497536-134497756	S_Shore		RDMR	NA	6:134498673-134500349	Promoter_Associated	NA
cg09410512	-4.12506	1.64612e-16	6.71293e-12	-4.31163	5.11067e-19	1.39876e-15	37	2	224564400	F							DMR	TRUE			TRUE
cg09411730	-4.00425	1.0729e-06	0.000306825	-5.19641	1.29683e-10	1.02694e-08	37	11	65190946	R	NEAT1	NR_028272	Body	chr11:65190824-65191058	Island		RDMR	NA	11:65188622-65191947	Promoter_Associated	NA
cg09416188	-2.91944	3.69992e-07	0.000137794	-2.48917	2.23408e-06	4.39005e-05	37	3	49538552	R	DAG1;DAG1	NM_001165928;NM_004393	5'UTR;5'UTR					TRUE			TRUE
cg09423651	-3.03087	5.07293e-08	2.87985e-05	-3.7675	6.32586e-12	8.13068e-10	37	3	136618442	R	NCK1	NM_006153	5'UTR					TRUE			NA
cg09432154	-1.69307	6.15378e-06	0.0011362	-1.92139	7.55458e-08	2.3487e-06	37	3	151034669	F	MED12L;GPR87	NM_053002;NM_023915	Body;TSS200					NA			NA
cg09435170	-3.44225	4.32063e-12	1.57319e-08	-3.73083	9.03e-15	3.64963e-12	37	4	184256627	F								TRUE			TRUE
cg09442403	-1.49113	6.62653e-07	0.000213329	-1.44102	2.58782e-07	6.81822e-06	37	3	149089298	F	TM4SF1	NM_014220	Body					NA			NA
cg09442613	-2.11799	1.8802e-05	0.00263037	-3.34514	2.67916e-11	2.72191e-09	37	12	76054089	R								TRUE			NA
cg09451215	-2.2041	9.39694e-05	0.00847437	-3.28238	4.19665e-09	1.96465e-07	37	6	82459960	F	FAM46A	NM_017633	Body	chr6:82461133-82463805	N_Shore		RDMR	NA			NA
cg09456094	-2.44973	1.75111e-13	1.32243e-09	-2.06863	6.02797e-12	7.82627e-10	37	2	231280878	F	SP100;SP100;SP100;SP100	NM_001080391;NM_003113;NM_001080391;NM_003113	5'UTR;1stExon;1stExon;5'UTR			low-CpG:230988965-230989223		NA	2:231280510-231281142	Promoter_Associated_Cell_type_specific	TRUE
cg09456971	-0.766534	9.834e-06	0.00162099	-0.617286	9.74961e-05	0.00116109	37	19	11146717	F	SMARCA4;SMARCA4;SMARCA4;SMARCA4;SMARCA4;SMARCA4;SMARCA4	NM_001128846;NM_001128848;NM_001128844;NM_003072;NM_001128847;NM_001128849;NM_001128845	Body;Body;Body;Body;Body;Body;Body	chr19:11145589-11145790	S_Shore			NA	19:11146516-11147083	Gene_Associated	NA
cg09461545	-2.33317	7.05447e-07	0.000224402	-3.13518	2.07286e-11	2.20697e-09	37	4	25845210	R	SEL1L3	NM_015187	Body					TRUE	4:25845042-25845246	Unclassified	NA
cg09464137	-1.13629	9.2524e-10	1.16816e-06	-1.18269	2.11959e-11	2.24806e-09	37	2	10444574	F	HPCAL1;HPCAL1	NM_002149;NM_134421	5'UTR;5'UTR	chr2:10442308-10444509	S_Shore			NA	2:10443656-10445129	Promoter_Associated	NA
cg09469665	-2.09377	1.14237e-05	0.0018134	-1.85656	2.46337e-05	0.000353511	37	7	27154660	R	HOXA3;HOXA3;HOXA3	NM_153631;NM_153632;NM_030661	5'UTR;TSS1500;5'UTR	chr7:27154999-27155426	N_Shore			NA			TRUE
cg09476997	1.10786	8.35962e-05	0.00782282	1.17058	9.74262e-06	0.000158032	37	16	2087932	F	SLC9A3R2;SLC9A3R2	NM_001130012;NM_004785	Body;Body	chr16:2088753-2088998	N_Shore			NA			NA
cg09477895	-2.25568	1.44512e-06	0.000386876	-2.87594	3.60912e-10	2.43517e-08	37	3	18140683	F								TRUE			TRUE
cg09480446	-1.3402	3.09761e-05	0.00378514	-3.12969	8.48776e-18	1.37902e-14	37	7	107640935	R	LAMB1	NM_002291	Body	chr7:107641795-107644058	N_Shore			NA			NA
cg09481537	1.48759	2.86004e-06	0.000639438	1.77112	7.48167e-09	3.22147e-07	37	12	131701863	F								NA			NA
cg09486967	0.673351	6.31065e-06	0.0011593	0.865337	2.72431e-09	1.34976e-07	37	17	1437322	R	PITPNA	NM_006224	Body					NA	17:1436279-1437331	Unclassified	NA
cg09499849	-1.45167	9.83794e-06	0.00162099	-2.05317	3.06767e-10	2.1254e-08	37	2	158695158	R	ACVR1;ACVR1	NM_001105;NM_001111067	5'UTR;5'UTR					TRUE			NA
cg09501687	-3.18357	2.76688e-09	2.8932e-06	-2.22191	2.78987e-06	5.32866e-05	37	5	150169781	R	C5orf62	NM_032947	Body					TRUE			TRUE
cg09502809	0.942907	8.64049e-05	0.00799425	0.885764	7.08741e-05	0.000880993	37	1	32248172	F								TRUE			NA
cg09514366	-2.1333	3.64283e-06	0.00076694	-2.53609	1.09515e-08	4.45759e-07	37	16	11690918	R								TRUE			NA
cg09528494	-2.08156	4.72109e-05	0.00517131	-2.19393	5.09525e-06	8.99313e-05	37	8	11338675	R								TRUE			TRUE
cg09537553	-2.91431	1.23243e-10	2.23374e-07	-3.24217	1.64824e-13	3.95155e-11	37	7	962492	F	ADAP1	NM_006869	Body	chr7:965987-966266	N_Shelf			NA			TRUE
cg09538452	-1.07507	7.5652e-06	0.00132068	-0.911625	3.53533e-05	0.000483994	37	19	18496756	F	GDF15	NM_004864	TSS1500	chr19:18497063-18497269	N_Shore			TRUE	19:18496630-18497234	Unclassified	TRUE
cg09546172	-0.780915	6.90714e-06	0.00123714	-0.752728	3.27275e-06	6.12165e-05	37	21	43933663	R	SLC37A1	NM_018964	5'UTR	chr21:43933589-43934832	Island			NA	21:43933463-43934833	Promoter_Associated_Cell_type_specific	TRUE
cg09546258	-1.69494	9.38312e-08	4.60466e-05	-1.73407	7.0254e-09	3.05143e-07	37	11	68444995	F								TRUE			TRUE
cg09550697	-2.95031	7.00356e-05	0.00689375	-3.89526	6.27736e-08	2.00386e-06	37	8	145012068	R	PLEC1;PLEC1;PLEC1;PLEC1;PLEC1;PLEC1;PLEC1;PLEC1	NM_201378;NM_201384;NM_201382;NM_201381;NM_000445;NM_201380;NM_201383;NM_201379	Body;Body;Body;Body;Body;Body;Body;Body	chr8:145008908-145009407	S_Shelf			NA			NA
cg09575189	-2.08228	8.91132e-06	0.0015023	-1.48608	0.000455298	0.00435085	37	11	1855561	R	SYT8	NM_138567	TSS200					NA			TRUE
cg09576223	-0.828097	4.30378e-06	0.000870153	-1.0058	7.67348e-09	3.28913e-07	37	22	39092757	F	JOSD1	NM_014876	Body	chr22:39096373-39097754	N_Shelf			NA			TRUE
cg09581137	-2.11323	9.59626e-06	0.00159016	-1.40079	0.00111118	0.00924291	37	16	12069782	R	RUNDC2A	NM_032167	TSS1500	chr16:12070257-12070870	N_Shore			NA			NA
cg09621958	-1.73964	1.30736e-09	1.5727e-06	-1.88653	7.44108e-12	9.30829e-10	37	3	112395854	F								TRUE	3:112395716-112396091	Unclassified	TRUE
cg09624858	-2.84029	2.49789e-05	0.00326425	-4.23262	3.20443e-10	2.20331e-08	37	6	30132226	R	TRIM15	NM_033229	Body					NA			NA
cg09633081	-1.8372	2.99675e-06	0.000662018	-1.54812	1.75119e-05	0.000262891	37	6	7692342	F								TRUE			TRUE
cg09634469	2.1956	1.10561e-12	5.43222e-09	2.13707	1.66509e-13	3.98258e-11	37	22	21128411	R	SERPIND1;SERPIND1;PI4KA	NM_000185;NM_000185;NM_058004	1stExon;5'UTR;Body			low-CpG:19458378-19458414		NA			NA
cg09642408	2.11183	1.30284e-06	0.000358747	2.38944	1.05742e-08	4.32736e-07	37	15	101208028	F								TRUE			NA
cg09643186	-2.0579	3.06167e-06	0.000671354	-1.77292	1.21143e-05	0.000190767	37	14	65409452	F	GPX2;GPX2	NM_002083;NM_002083	1stExon;5'UTR			low-CpG:64479097-64479339		NA			NA
cg09645138	1.87576	2.27225e-05	0.00303515	2.49989	7.54319e-09	3.24503e-07	37	5	82155751	R								TRUE			NA
cg09650907	-1.5389	4.96987e-07	0.000171321	-0.975357	0.000338584	0.00338272	37	17	71224983	F	FAM104A;FAM104A	NM_032837;NM_001098832	Body;Body	chr17:71228060-71229074	N_Shelf			NA	17:71224922-71225174	Unclassified	TRUE
cg09662852	-1.40143	8.09575e-05	0.00765097	-1.29675	8.32295e-05	0.00101139	37	16	11707685	R								TRUE	16:11707645-11707961	Unclassified_Cell_type_specific	NA
cg09666573	-1.48495	2.3368e-05	0.00309803	-1.82731	6.52423e-08	2.07084e-06	37	3	11267627	F	HRH1;HRH1;HRH1	NM_001098213;NM_001098211;NM_001098212	5'UTR;TSS200;5'UTR					NA			TRUE
cg09668627	-2.28653	1.01348e-05	0.0016532	-2.26331	2.92831e-06	5.56467e-05	37	1	1371844	R	VWA1;VWA1	NM_022834;NM_199121	Body;Body	chr1:1370767-1371449	S_Shore			NA	1:1371719-1371876	Unclassified	NA
cg09672452	-1.94691	0.000107391	0.00935379	-3.88544	2.83249e-13	6.19866e-11	37	15	55665236	R	CCPG1;MIR628;CCPG1	NM_020739;NR_030358;NM_004748	Body;TSS200;Body					NA			NA
cg09676630	-1.59251	6.07436e-07	0.000200254	-1.89292	9.0867e-10	5.28842e-08	37	12	133101224	R	FBRSL1	NM_001142641	Body	chr12:133102168-133102604	N_Shore			TRUE	12:133099310-133101431	Unclassified	NA
cg09678939	-2.97302	5.13603e-08	2.90096e-05	-3.94269	5.75706e-13	1.12172e-10	37	6	149806081	F	ZC3H12D;ZC3H12D	NM_207360;NM_207360	5'UTR;1stExon			low-CpG:149847673-149847863		NA	6:149805583-149806902	Promoter_Associated	NA
cg09685472	-1.27078	1.01717e-05	0.00165855	-1.26611	2.58132e-06	4.98236e-05	37	16	81527427	R	CMIP	NM_198390	Body					TRUE	16:81527395-81527534	Unclassified_Cell_type_specific	TRUE
cg09696385	0.450772	9.25389e-05	0.00838058	0.589571	1.25716e-07	3.64141e-06	37	7	127528039	F	SND1	NM_014390	Body					TRUE			NA
cg09701062	1.09736	1.84316e-06	0.00046398	0.7212	0.000460959	0.00439598	37	5	133446318	R				chr5:133449320-133451260	N_Shelf			NA			NA
cg09737499	-2.69194	1.23043e-08	9.13982e-06	-1.55867	0.000155098	0.00172813	37	11	126301004	R	KIRREL3;KIRREL3	NM_032531;NM_001161707	Body;3'UTR					NA			NA
cg09742465	-1.46014	3.20997e-05	0.00389247	-2.64701	5.59822e-13	1.09548e-10	37	2	8618154	R								TRUE	2:8617671-8618390	Promoter_Associated	NA
cg09743615	1.12586	4.51814e-05	0.00500955	1.16847	6.46817e-06	0.000110811	37	11	69054431	F								TRUE			NA
cg09771595	-1.41465	5.43933e-06	0.00103653	-1.391	1.69514e-06	3.45539e-05	37	12	76353360	F								TRUE	12:76353242-76353559	Unclassified_Cell_type_specific	NA
cg09782560	-2.83141	3.26071e-06	0.000706176	-4.64534	1.91083e-13	4.45281e-11	37	15	92058845	R								TRUE			TRUE
cg09790270	-2.29299	4.87354e-08	2.78744e-05	-2.94573	1.78004e-12	2.8378e-10	37	1	205774639	F	SLC41A1	NM_173854	Body					TRUE			NA
cg09805403	-1.98737	1.45228e-05	0.00217019	-1.9806	3.81449e-06	6.99192e-05	37	16	12010698	F	GSPT1;GSPT1;GSPT1	NM_001130006;NM_002094;NM_001130007	TSS1500;TSS1500;TSS200	chr16:12008880-12010114	S_Shore			NA			NA
cg09809932	2.03194	4.07265e-05	0.00464832	2.32062	8.23963e-07	1.85286e-05	37	1	6515597	R	ESPN	NM_031475	Body	chr1:6514108-6516325	Island			NA	1:6514466-6515837	Unclassified_Cell_type_specific	NA
cg09820373	-1.19566	1.82239e-05	0.00257244	-1.7138	6.04945e-10	3.73956e-08	37	12	46126202	F	ARID2	NM_152641	Body	chr12:46120726-46124104	S_Shelf			NA	12:46126007-46126384	Promoter_Associated_Cell_type_specific	NA
cg09841972	-1.87553	1.97199e-06	0.000486287	-1.76231	1.49267e-06	3.09969e-05	37	13	76337398	R	LMO7;LMO7	NM_015842;NM_005358	5'UTR;Body					TRUE			NA
cg09848638	0.450209	4.10974e-05	0.00467364	0.417253	4.12571e-05	0.00055332	37	7	733065	F	PRKAR1B;PRKAR1B;PRKAR1B;PRKAR1B;PRKAR1B;PRKAR1B	NM_001164759;NM_001164762;NM_001164758;NM_001164760;NM_001164761;NM_002735	Body;Body;Body;Body;Body;Body					NA			NA
cg09853702	-3.37699	6.81176e-10	9.10775e-07	-2.85636	9.8833e-09	4.08602e-07	37	12	47665230	R								TRUE			NA
cg09884146	-2.02296	1.41836e-08	1.02374e-05	-1.22026	9.31561e-05	0.0011156	37	2	65593908	R	SPRED2;SPRED2;SPRED2	NM_001128210;NM_001128210;NM_181784	5'UTR;1stExon;Body					TRUE			NA
cg09889848	-1.93461	2.7404e-06	0.00062017	-1.7278	5.65237e-06	9.84185e-05	37	10	370009	F	DIP2C	NM_014974	Body	chr10:367469-369416	S_Shore			TRUE	10:369759-370193	Unclassified_Cell_type_specific	TRUE
cg09890746	1.19135	1.1175e-05	0.00178505	0.942939	0.000138305	0.00156592	37	8	144521404	R	ZC3H3	NM_015117	Body	chr8:144521358-144521608	Island			NA	8:144521128-144521418	Unclassified_Cell_type_specific	NA
cg09894383	-1.55655	6.49917e-07	0.000210515	-1.71203	9.45917e-09	3.93461e-07	37	16	82067445	R	HSD17B2	NM_002153	TSS1500					TRUE			NA
cg09903879	-1.92275	6.86058e-07	0.000219261	-2.35621	4.19785e-10	2.75935e-08	37	12	13348386	R	EMP1	NM_001423	TSS1500					TRUE			NA
cg09906382	1.1066	1.5844e-06	0.000413388	1.14066	1.47949e-07	4.19047e-06	37	2	157184416	R	NR4A2	NM_006186	Body	chr2:157184389-157184632	Island			NA			NA
cg09915232	-1.29709	6.4856e-05	0.00650001	-1.60641	2.61134e-07	6.87353e-06	37	8	1879280	R	ARHGEF10	NM_014629	Body				CDMR	NA			NA
cg09923954	-2.30558	1.70994e-05	0.00244845	-3.91416	1.63003e-12	2.63469e-10	37	10	65460017	F								TRUE			TRUE
cg09924669	-1.61579	6.94412e-06	0.00124149	-1.09862	0.000688433	0.00617716	37	16	1593214	F	IFT140;TMEM204	NM_014714;NM_024600	Body;Body	chr16:1591813-1592107	S_Shore			NA	16:1593179-1594034	Promoter_Associated_Cell_type_specific	NA
cg09929879	0.865891	1.06074e-05	0.00171181	1.08851	1.1306e-08	4.5813e-07	37	10	343794	R	DIP2C	NM_014974	Body	chr10:346504-346828	N_Shelf			TRUE			TRUE
cg09934326	-0.750626	3.21656e-05	0.00389704	-0.624983	0.000161683	0.00179117	37	1	43832826	F	ELOVL1	NM_022821	5'UTR	chr1:43832814-43833073	Island			NA			NA
cg09939948	-1.70034	7.65376e-08	3.95485e-05	-2.40198	8.89677e-14	2.39165e-11	37	15	90548043	F	ZNF710	NM_198526	5'UTR	chr15:90545272-90545911	S_Shelf		CDMR	NA	15:90547433-90548141	Unclassified_Cell_type_specific	TRUE
cg09960553	-1.02448	1.92989e-06	0.000478797	-1.23443	3.05515e-09	1.49245e-07	37	16	87840374	R								TRUE	16:87839890-87841201	Unclassified	TRUE
cg09960641	-2.15686	1.62498e-10	2.86872e-07	-2.05889	6.17144e-11	5.49506e-09	37	19	35598494	F	LOC100128675;LOC100128675	NR_024562;NR_024561	TSS1500;TSS1500					NA			TRUE
cg09977847	-1.41199	7.76498e-06	0.00135093	-2.62833	6.87579e-15	2.95466e-12	37	2	217070953	R	XRCC5	NM_021141	3'UTR					NA	2:217070860-217071436	Gene_Associated_Cell_type_specific	NA
cg09980114	1.0584	2.15528e-05	0.00291191	1.18245	5.71037e-07	1.35202e-05	37	14	102669785	R	WDR20;WDR20;WDR20;WDR20	NM_181302;NM_181291;NM_144574;NM_181308	Body;Body;Body;Body					TRUE			NA
cg09981432	-1.7866	2.65555e-05	0.0034087	-1.4146	0.000271397	0.00280202	37	2	118614378	F				chr2:118616575-118618163	N_Shelf			NA			TRUE
cg09985344	-1.21488	4.93812e-06	0.000963467	-1.50964	4.93795e-09	2.25854e-07	37	16	84648441	F	COTL1	NM_021149	Body	chr16:84650960-84651565	N_Shelf			TRUE			NA
cg09987620	0.675318	9.22477e-05	0.00836349	0.702636	1.44344e-05	0.000222179	37	10	18549439	R	CACNB2;CACNB2;CACNB2;CACNB2;CACNB2;CACNB2;CACNB2	NM_201571;NM_201593;NM_201597;NM_201572;NM_201596;NM_000724;NM_001167945	Body;Body;Body;Body;Body;TSS200;Body					NA			NA
cg09988805	-3.83764	2.41351e-11	6.43295e-08	-4.9794	2.43122e-17	3.20861e-14	37	2	43278552	F								TRUE	2:43278108-43278840	Unclassified_Cell_type_specific	TRUE
cg09994756	-2.48638	1.06499e-05	0.00171745	-2.86327	1.09998e-07	3.25245e-06	37	4	8185163	R								TRUE			TRUE
cg10001186	-1.42299	4.88688e-05	0.00530164	-1.38897	2.10817e-05	0.000308951	37	11	94882829	F				chr11:94883335-94883565	N_Shore		RDMR	NA			NA
cg10008947	-1.5852	4.7041e-07	0.000164102	-2.72768	5.19622e-16	3.67889e-13	37	17	73500739	F	CASKIN2;CASKIN2	NM_001142643;NM_020753	Body;Body	chr17:73500947-73501182	N_Shore			NA	17:73500255-73501236	Unclassified	NA
cg10020892	-1.83585	2.02378e-06	0.000496274	-2.89036	3.78816e-13	7.98361e-11	37	1	147016901	R	BCL9	NM_004326	5'UTR					TRUE	1:147016749-147017348	Unclassified_Cell_type_specific	NA
cg10024501	-1.82882	3.87351e-05	0.00447996	-1.54653	0.000152909	0.00170728	37	6	43663647	R								TRUE			NA
cg10034572	-1.43892	6.76754e-05	0.0067035	-1.87613	8.11511e-08	2.49726e-06	37	2	160921789	R				chr2:160918674-160919177	S_Shelf			NA			NA
cg10047572	-2.19566	2.8521e-07	0.000112594	-2.47423	1.65567e-09	8.81795e-08	37	6	30711399	R	IER3;FLOT1	NM_003897;NM_005803	3'UTR;TSS1500	chr6:30710307-30712440	Island			NA	6:30710361-30712511	Promoter_Associated	NA
cg10051588	-2.5277	4.0192e-09	3.81173e-06	-1.25954	0.000631007	0.00573575	37	4	16255438	R	FLJ39653;FLJ39653	NR_027697;NR_027696	Body;Body	chr4:16257947-16258227	N_Shelf			TRUE			TRUE
cg10052840	-1.73297	8.49612e-05	0.0079054	-1.69393	3.74925e-05	0.000509805	37	19	4558119	R	SEMA6B	NM_032108	Body	chr19:4558363-4558579	N_Shore			NA	19:4557618-4558992	Unclassified_Cell_type_specific	NA
cg10053779	-2.45625	8.94245e-08	4.42569e-05	-2.87654	1.08102e-10	8.80805e-09	37	10	121497344	F	INPP5F;INPP5F	NM_014937;NR_003251	Body;Body					TRUE	10:121497304-121497650	Unclassified_Cell_type_specific	TRUE
cg10064525	-1.63116	1.62088e-05	0.00235148	-1.32742	0.000125848	0.00144384	37	1	109262682	F	FNDC7	NM_001144937	Body					TRUE			TRUE
cg10078415	-1.07635	7.31704e-05	0.00712492	-0.94915	0.000150897	0.00168791	37	16	20775011	R	ACSM3;ACSM3	NM_202000;NM_005622	TSS1500;TSS1500					TRUE	16:20774762-20775659	Promoter_Associated	TRUE
cg10081994	-2.33825	9.93132e-07	0.000289495	-2.75202	2.40063e-09	1.21177e-07	37	2	100908637	F	LONRF2	NM_198461	Body					TRUE			TRUE
cg10087556	-1.85995	5.8169e-05	0.00601857	-3.16316	2.29506e-11	2.40045e-09	37	7	116232819	F								TRUE	7:116231848-116232886	Unclassified	NA
cg10092779	-2.1811	0.000108138	0.00939039	-1.78657	0.000548876	0.00509988	37	1	57294085	F								NA			NA
cg10097651	-2.27507	4.52791e-05	0.00501463	-3.49155	4.02496e-10	2.66796e-08	37	14	35802397	F								TRUE	14:35802285-35802575	Unclassified_Cell_type_specific	NA
cg10099827	1.94697	1.83938e-13	1.36383e-09	1.70136	1.79155e-12	2.85391e-10	37	16	85551514	R				chr16:85551382-85551709	Island			NA			NA
cg10099957	-2.22431	2.51641e-07	0.000101604	-3.43889	1.65718e-14	6.01249e-12	37	16	87869757	F	SLC7A5	NM_003486	Body					NA	16:87869555-87869906	Unclassified_Cell_type_specific	NA
cg10100887	-2.1748	3.83381e-07	0.000141287	-1.509	8.34625e-05	0.00101365	37	20	56273259	F	PMEPA1;PMEPA1;PMEPA1;PMEPA1	NM_199171;NM_199170;NM_199169;NM_020182	5'UTR;5'UTR;Body;Body				CDMR	TRUE			TRUE
cg10110957	-0.826237	5.73691e-05	0.00595453	-0.972894	6.81558e-07	1.57225e-05	37	16	89460751	R	ANKRD11	NM_013275	5'UTR	chr16:89456147-89456770	S_Shelf			TRUE			NA
cg10112270	-1.3198	3.1883e-05	0.00387541	-0.97286	0.000742654	0.00658643	37	1	21913458	R								TRUE			NA
cg10118435	-1.93524	1.20643e-05	0.0018908	-3.46072	9.96529e-14	2.63017e-11	37	20	390551	R	RBCK1;RBCK1	NM_031229;NM_006462	Body;Body	chr20:388472-389342	S_Shore			NA	20:390418-390870	Promoter_Associated	NA
cg10123952	-1.47078	8.15047e-05	0.00768685	-1.74944	9.05273e-07	2.00998e-05	37	3	100791384	R								TRUE			NA
cg10130374	0.733433	3.49594e-05	0.00415644	0.665079	4.96557e-05	0.000648617	37	13	111935412	F	ARHGEF7;ARHGEF7;ARHGEF7;ARHGEF7;ARHGEF7	NM_001113511;NM_001113513;NM_001113512;NM_003899;NM_145735	Body;Body;Body;Body;Body	chr13:111935411-111935682	Island			NA			NA
cg10142520	-2.0276	7.79624e-05	0.0074475	-2.28376	2.63974e-06	5.07926e-05	37	11	65344604	F	EHBP1L1	NM_001099409	Body	chr11:65343329-65343849	S_Shore		RDMR	NA	11:65344436-65345014	Promoter_Associated	NA
cg10143960	2.46892	8.72118e-06	0.00147697	3.72942	2.78565e-11	2.80771e-09	37	1	1109486	R	TTLL10	NM_001130045	5'UTR	chr1:1109314-1110145	Island			TRUE	1:1108800-1109567	Unclassified_Cell_type_specific	NA
cg10166664	-1.94121	1.14945e-05	0.00182239	-2.05355	8.54218e-07	1.91036e-05	37	5	60624229	R				chr5:60626505-60629809	N_Shelf			TRUE			TRUE
cg10169070	1.4108	8.4329e-07	0.000255496	1.98621	5.2954e-12	7.02271e-10	37	6	114098428	R								TRUE			NA
cg10169194	-1.85869	8.1855e-07	0.000250043	-2.2676	6.20802e-10	3.82541e-08	37	22	41763253	R	TEF	NM_001145398	TSS200					TRUE	22:41763076-41763760	Unclassified_Cell_type_specific	NA
cg10170269	0.802314	5.5154e-08	3.07205e-05	0.801216	7.62252e-09	3.27072e-07	37	20	62256006	R	GMEB2	NM_012384	5'UTR	chr20:62257589-62259476	N_Shore			NA	20:62255860-62256038	Unclassified_Cell_type_specific	NA
cg10174683	1.52015	5.03649e-05	0.00541795	2.14572	5.9654e-09	2.64915e-07	37	16	85619974	R								TRUE			NA
cg10184881	-0.87935	3.2865e-06	0.0007095	-0.801402	4.57808e-06	8.19308e-05	37	1	32404326	R	PTP4A2;PTP4A2	NM_080392;NM_080391	TSS1500;TSS1500	chr1:32403387-32404382	Island			NA	1:32402939-32406060	Promoter_Associated	NA
cg10187713	-3.17184	2.46398e-08	1.63121e-05	-2.97221	1.85083e-08	7.00487e-07	37	20	49345687	F				chr20:49347365-49348659	N_Shore		CDMR	NA			NA
cg10188797	-3.40297	4.98001e-13	2.94329e-09	-2.65839	2.13827e-10	1.56076e-08	37	17	77962048	F	TBC1D16	NM_019020	Body	chr17:77965805-77966296	N_Shelf		CDMR	NA	17:77961972-77962126	Unclassified_Cell_type_specific	TRUE
cg10191399	1.03266	9.64642e-06	0.00159588	1.43678	4.96969e-10	3.17708e-08	37	16	81727056	F	CMIP;CMIP	NM_030629;NM_198390	Body;Body					TRUE			TRUE
cg10201923	-1.30235	7.66972e-05	0.00735766	-2.03109	7.09187e-10	4.28158e-08	37	1	17308303	R	MFAP2;MFAP2;MFAP2;MFAP2	NM_002403;NM_001135247;NM_017459;NM_001135248	TSS1500;TSS1500;TSS1500;TSS1500	chr1:17306551-17307363	S_Shore			NA			NA
cg10210806	0.893973	5.42027e-06	0.00103387	1.04721	2.82928e-08	1.00741e-06	37	1	6514605	F	ESPN	NM_031475	Body	chr1:6514108-6516325	Island			NA	1:6514466-6515837	Unclassified_Cell_type_specific	NA
cg10211776	-2.76642	2.09021e-07	8.80575e-05	-3.65964	5.38888e-12	7.11891e-10	37	8	37744077	R	RAB11FIP1;RAB11FIP1	NM_025151;NM_001002814	Body;Body					TRUE			TRUE
cg10214581	-2.54035	2.50873e-07	0.000101394	-3.74472	1.16436e-13	2.9714e-11	37	14	94811949	R								TRUE			TRUE
cg10231182	-2.7848	2.48205e-05	0.00324837	-5.56443	5.6273e-15	2.51076e-12	37	12	15815827	R	EPS8	NM_004447	Body					TRUE			TRUE
cg10236239	3.10184	7.5467e-06	0.00131802	4.56758	5.08255e-11	4.6595e-09	37	2	108994514	R	SULT1C4;SULT1C4	NM_006588;NM_006588	5'UTR;1stExon					TRUE			NA
cg10238302	0.77344	5.58057e-05	0.00583533	0.996843	7.91145e-08	2.44326e-06	37	2	109513151	F	EDAR	NM_022336	3'UTR					NA			NA
cg10248985	-1.32259	7.06734e-06	0.00125801	-2.51775	2.09147e-15	1.11784e-12	37	15	89169255	R	AEN	NM_022767	5'UTR					NA			NA
cg10255237	-2.75676	3.31564e-07	0.000127101	-2.97051	7.27541e-09	3.14595e-07	37	12	90150622	F								TRUE	12:90150416-90150873	Unclassified	TRUE
cg10264003	-1.78909	5.74914e-06	0.00108192	-1.53446	2.29947e-05	0.000333132	37	11	110198965	F								NA			NA
cg10266490	1.63414	1.40153e-05	0.00211294	1.30805	0.000141287	0.00159472	37	1	55013709	R	ACOT11;ACOT11	NM_147161;NM_015547	TSS200;TSS200					NA	1:55013618-55014223	Unclassified	NA
cg10274208	-1.51914	7.86938e-05	0.0074963	-1.54129	1.85411e-05	0.000276276	37	13	41351044	F							DMR	NA	13:41350841-41352231	Unclassified	NA
cg10278102	-1.57372	2.89427e-05	0.00361832	-2.05269	2.01653e-08	7.55697e-07	37	11	20410216	F	PRMT3;PRMT3;PRMT3	NM_001145167;NM_001145166;NM_005788	5'UTR;Body;Body	chr11:20408755-20409781	S_Shore			NA	11:20408470-20410310	Promoter_Associated	NA
cg10288437	-1.21557	0.000108021	0.00938663	-1.82324	4.4974e-09	2.08416e-07	37	6	158432894	F	SYNJ2	NM_003898	Body					TRUE			NA
cg10296718	1.03342	6.34938e-07	0.000207194	0.888304	3.07622e-06	5.80838e-05	37	8	1848143	R	ARHGEF10	NM_014629	Body					NA			TRUE
cg10314760	1.94888	4.56856e-05	0.00504625	2.92247	8.40244e-10	4.94251e-08	37	10	123353654	F	FGFR2;FGFR2;FGFR2;FGFR2;FGFR2;FGFR2;FGFR2;FGFR2;FGFR2;FGFR2	NM_001144913;NM_001144914;NM_001144918;NM_001144919;NM_001144916;NM_000141;NM_001144916;NM_022970;NM_001144917;NM_001144915	TSS200;TSS200;5'UTR;5'UTR;1stExon;5'UTR;5'UTR;5'UTR;5'UTR;5'UTR	chr10:123356616-123358285	N_Shelf			NA			NA
cg10316899	-4.3282	5.727e-15	1.22921e-10	-4.23269	5.4761e-16	3.81088e-13	37	1	39658128	R	MACF1	NM_012090	Body					TRUE	1:39657089-39658953	Unclassified	TRUE
cg10317380	-1.10993	1.24635e-07	5.77874e-05	-1.44031	4.94104e-12	6.63912e-10	37	11	122934257	F	HSPA8;HSPA8	NM_153201;NM_006597	TSS1500;TSS1500	chr11:122932173-122933803	S_Shore		RDMR	NA			NA
cg10342016	-2.24012	9.44441e-06	0.00156947	-2.05399	1.15057e-05	0.000182536	37	8	57802622	F								TRUE			TRUE
cg10345724	1.49758	4.05233e-05	0.00463031	2.24696	6.54837e-10	4.00068e-08	37	7	1120465	R	C7orf50;C7orf50;C7orf50	NM_001134395;NM_032350;NM_001134396	Body;Body;Body	chr7:1119980-1120248	S_Shore			NA			NA
cg10351165	-2.88776	1.73191e-07	7.51361e-05	-3.38243	2.60552e-10	1.85176e-08	37	3	168919516	R	MECOM	NM_004991	Body					TRUE			NA
cg10351914	1.43098	6.58475e-05	0.00657836	1.22376	0.000208631	0.00223403	37	17	19290690	F	MFAP4	NM_002404	TSS200					TRUE			TRUE
cg10362842	1.65531	5.92744e-11	1.26557e-07	1.86372	4.16947e-14	1.2794e-11	37	10	123353578	R	FGFR2;FGFR2;FGFR2;FGFR2;FGFR2;FGFR2;FGFR2;FGFR2;FGFR2;FGFR2	NM_001144913;NM_001144914;NM_001144918;NM_001144919;NM_001144916;NM_000141;NM_001144916;NM_022970;NM_001144917;NM_001144915	TSS200;TSS200;5'UTR;5'UTR;1stExon;5'UTR;5'UTR;5'UTR;5'UTR;5'UTR	chr10:123356616-123358285	N_Shelf			NA			NA
cg10373607	-2.83643	2.29728e-05	0.00306357	-2.51219	4.82043e-05	0.000632412	37	20	51592177	F	TSHZ2	NM_173485	Body	chr20:51589707-51590020	S_Shelf			NA	20:51592144-51592252	Unclassified	NA
cg10375192	-1.40363	2.6092e-08	1.69704e-05	-1.60339	4.94451e-11	4.55892e-09	37	1	901799	R	PLEKHN1;PLEKHN1	NM_032129;NM_001160184	TSS200;TSS200	chr1:894313-902654	Island			TRUE			NA
cg10397932	-1.30744	8.01663e-07	0.000245479	-1.78005	1.60964e-11	1.78437e-09	37	1	2166155	F	SKI	NM_003036	Body					NA	1:2165693-2166478	Promoter_Associated	TRUE
cg10399946	-1.44996	3.49524e-05	0.00415644	-1.30137	5.82398e-05	0.000743479	37	6	33242016	R	RPS18	NM_022551	Body	chr6:33239326-33240099	S_Shore			NA			NA
cg10407489	1.25924	7.28343e-05	0.00710237	1.31529	1.01543e-05	0.000163707	37	4	1043616	F				chr4:1043387-1043645	Island			NA	4:1043573-1043740	Unclassified_Cell_type_specific	NA
cg10411087	1.28817	1.66173e-07	7.28666e-05	1.50413	2.72335e-10	1.91945e-08	37	17	26799318	F	SLC13A2;SLC13A2;SLC13A2;SLC13A2	NR_027384;NM_001145975;NM_003984;NM_001145976	TSS1500;TSS1500;TSS1500;TSS1500					NA			NA
cg10418357	-0.82237	1.14044e-05	0.00181131	-1.15426	5.05521e-10	3.2179e-08	37	14	23777535	F	BCL2L2	NM_004050	Body					TRUE			NA
cg10418626	2.17722	2.54506e-07	0.000102341	2.83392	1.29975e-11	1.49477e-09	37	14	69052740	R	RAD51L1	NM_133509	Body					NA			NA
cg10423842	-1.95328	8.22717e-05	0.00773091	-2.188	3.163e-06	5.94635e-05	37	6	56200769	F								TRUE	6:56200754-56200908	Unclassified_Cell_type_specific	NA
cg10433904	0.988198	8.27121e-06	0.00142322	1.17145	3.74252e-08	1.28253e-06	37	6	131281636	R	EPB41L2;EPB41L2;EPB41L2	NM_001135554;NM_001431;NM_001135555	5'UTR;5'UTR;5'UTR					TRUE			NA
cg10437931	-1.39667	9.3908e-06	0.00156311	-1.29426	9.45622e-06	0.000153957	37	2	12746791	R								TRUE			NA
cg10441898	-1.61218	5.2064e-05	0.00555373	-3.11258	1.55823e-13	3.76899e-11	37	1	43839507	F								TRUE			NA
cg10460033	-1.54901	3.38252e-09	3.32387e-06	-1.70543	1.3682e-11	1.56029e-09	37	3	13894328	F	WNT7A	NM_004625	Body	chr3:13895991-13896305	N_Shore			TRUE			NA
cg10472711	1.04151	9.66014e-05	0.00864671	1.02678	3.76e-05	0.000511114	37	7	797592	F	HEATR2	NM_017802	Body	chr7:796345-796926	S_Shore			NA			NA
cg10490577	1.02992	0.000109838	0.00949394	1.36244	1.26974e-07	3.67185e-06	37	13	30009956	F	MTUS2;MTUS2	NM_015233;NM_001033602	Body;Body					TRUE			TRUE
cg10502324	-1.09465	1.68369e-06	0.000432649	-0.807669	9.23031e-05	0.00110682	37	12	76372038	F								TRUE	12:76371643-76372294	NonGene_Associated	TRUE
cg10503827	-2.25202	1.20325e-05	0.00188655	-2.20165	4.50055e-06	8.07311e-05	37	7	124401702	R	GPR37	NM_005302	Body	chr7:124404174-124404432	N_Shelf			NA			NA
cg10510796	-2.10571	0.000115094	0.00984188	-3.71848	3.05194e-11	3.02233e-09	37	12	98893636	R				chr12:98897604-98897849	N_Shelf			NA			NA
cg10513302	-1.20389	3.92421e-07	0.000143783	-1.315	6.11215e-09	2.70548e-07	37	6	30698905	F	FLOT1	NM_005803	Body					NA	6:30698505-30699531	Promoter_Associated	TRUE
cg10516117	-1.09897	3.32623e-05	0.00398956	-1.77712	3.85653e-11	3.69788e-09	37	17	1656147	F	SERPINF2;SERPINF2;SERPINF2	NM_000934;NM_001165921;NM_001165920	Body;Body;Body	chr17:1657447-1657677	N_Shore			NA	17:1656092-1656202	Unclassified_Cell_type_specific	TRUE
cg10517290	-2.03274	1.02749e-06	0.000296815	-3.16828	1.5663e-13	3.78403e-11	37	17	76377967	R	PGS1	NM_024419	Body	chr17:76374443-76375201	S_Shelf			NA	17:76377538-76378304	Promoter_Associated	NA
cg10524915	-2.80849	1.34006e-11	3.84847e-08	-2.55588	2.55481e-11	2.61709e-09	37	14	94857046	R	SERPINA1;SERPINA1;SERPINA1;SERPINA1;SERPINA1;SERPINA1;SERPINA1;SERPINA1;SERPINA1;SERPINA1	NM_001127706;NM_001127704;NM_001127700;NM_001127701;NM_001127707;NM_001002235;NM_001127703;NM_001127705;NM_001127702;NM_001002236	TSS200;TSS200;TSS200;TSS200;TSS200;TSS200;TSS200;TSS200;TSS200;TSS200			low-CpG:93926679-93926810		NA			NA
cg10530055	-1.59094	9.72575e-06	0.00160685	-1.20554	0.000225756	0.00239053	37	1	32041605	F	TINAGL1	NM_022164	TSS1500					NA			TRUE
cg10531918	-2.20785	8.11126e-05	0.00765696	-3.16204	9.5093e-09	3.95425e-07	37	3	53189890	R				chr3:53190509-53190764	N_Shore			TRUE	3:53189776-53190273	Unclassified_Cell_type_specific	NA
cg10532384	1.41445	8.94705e-06	0.00150683	1.08807	0.000173145	0.00190142	37	3	141161876	R	ZBTB38	NM_001080412	Body					NA			NA
cg10537807	-1.09622	2.99837e-06	0.000662019	-1.29728	9.4563e-09	3.93381e-07	37	17	56415478	R								TRUE	17:56414344-56416124	Promoter_Associated	TRUE
cg10558233	-2.06936	1.82107e-05	0.00257244	-1.62868	0.000218823	0.00232788	37	8	94892613	R								TRUE			NA
cg10579705	-1.66017	3.20275e-11	7.86804e-08	-1.60071	8.06901e-12	9.97143e-10	37	8	22811322	F								TRUE			TRUE
cg10589330	-1.81157	1.27026e-05	0.00195826	-2.42116	2.66175e-09	1.32278e-07	37	15	60383523	F								TRUE			TRUE
cg10590964	-1.47655	1.86617e-06	0.000468298	-1.44205	6.15549e-07	1.44076e-05	37	2	202929157	R								TRUE	2:202929042-202929205	Unclassified_Cell_type_specific	NA
cg10592592	-1.60723	1.16736e-08	8.7671e-06	-2.18061	2.43288e-14	8.22974e-12	37	10	74034663	R	DDIT4	NM_019058	Body	chr10:74033167-74034698	Island			NA	10:74034192-74035368	Promoter_Associated	NA
cg10621374	-1.53696	6.63296e-06	0.00120327	-1.74156	8.66718e-08	2.64263e-06	37	19	36505899	R	CLIP3;ALKBH6;ALKBH6	NM_015526;NM_032878;NM_198867	3'UTR;TSS1500;TSS1500	chr19:36505200-36505481	S_Shore			NA	19:36504390-36505935	Promoter_Associated	NA
cg10624729	1.02106	4.04041e-05	0.00462408	1.38139	1.31226e-08	5.21023e-07	37	1	78298207	F	FAM73A	NM_198549	Body					TRUE			NA
cg10628699	0.881988	9.66056e-06	0.00159757	1.04446	4.784e-08	1.58716e-06	37	13	103531040	R	LOC121952	NR_026965	TSS1500					TRUE			NA
cg10633906	-1.25272	7.30079e-05	0.0071159	-1.33617	6.94043e-06	0.000117779	37	7	1595602	F	TMEM184A	NM_001097620	5'UTR					TRUE	7:1594906-1596387	Unclassified_Cell_type_specific	NA
cg10646254	-1.43365	6.36083e-05	0.0064112	-1.99531	1.33911e-08	5.30653e-07	37	19	51326980	F	KLK1	NM_002257	1stExon	chr19:51330212-51330470	N_Shelf			NA			NA
cg10649156	-2.87432	1.63732e-09	1.89227e-06	-3.37406	5.1334e-13	1.02218e-10	37	22	39688157	R				chr22:39688128-39688349	Island			TRUE			NA
cg10652637	0.903215	2.13146e-05	0.00288776	1.39124	8.04364e-11	6.85953e-09	37	5	98299078	R								TRUE			NA
cg10670376	1.98015	7.73897e-08	3.9798e-05	1.71504	3.89636e-07	9.71419e-06	37	5	142432538	F	ARHGAP26;ARHGAP26	NM_015071;NM_001135608	Body;Body					TRUE			NA
cg10671066	-1.93809	9.5793e-05	0.00860375	-3.36251	3.62382e-11	3.50773e-09	37	1	160492861	F	SLAMF6	NM_052931	Body					NA			NA
cg10689689	1.35314	6.07266e-06	0.00112566	1.28019	4.11854e-06	7.47134e-05	37	11	63677197	R	MARK2;MARK2;MARK2;MARK2;MARK2	NM_001039469;NM_001163296;NM_004954;NM_017490;NM_001163297	3'UTR;3'UTR;3'UTR;3'UTR;3'UTR	chr11:63676319-63676649	S_Shore			NA			NA
cg10692140	-1.42005	9.54004e-05	0.00857498	-1.14611	0.000590402	0.00542344	37	6	30496072	R								TRUE			TRUE
cg10707788	2.20618	6.50062e-06	0.00118898	2.50184	8.27634e-08	2.53998e-06	37	6	1635847	R	GMDS	NM_001500	Body					NA			NA
cg10708400	-3.52506	2.5193e-07	0.00010162	-4.07352	6.56495e-10	4.00841e-08	37	6	30130449	F	TRIM15	NM_033229	TSS1500					NA			NA
cg10710472	0.432083	3.7505e-05	0.00437241	0.400732	3.72351e-05	0.000506746	37	1	8394347	R	SLC45A1	NM_001080397	Body	chr1:8395343-8395635	N_Shore			NA			NA
cg10717189	-1.64873	8.92472e-05	0.00817506	-1.34924	0.000474039	0.00450177	37	2	114735571	R				chr2:114736853-114737689	N_Shore			TRUE	2:114735130-114735979	Unclassified	TRUE
cg10725768	-1.69683	1.26687e-07	5.84427e-05	-1.52444	2.66563e-07	7.0006e-06	37	11	17097511	R	RPS13	NM_001017	Body	chr11:17098839-17099506	N_Shore			NA			NA
cg10726725	1.06332	7.38455e-05	0.00716763	1.22004	1.68332e-06	3.43507e-05	37	8	140930736	R	TRAPPC9;TRAPPC9	NM_001160372;NM_031466	Body;Body					NA	8:140930652-140930857	Unclassified_Cell_type_specific	NA
cg10728473	-2.05378	1.79531e-07	7.73928e-05	-2.26761	1.68849e-09	8.9623e-08	37	3	197226514	F				chr3:197225631-197226150	S_Shore			NA			TRUE
cg10732871	-1.84787	4.84096e-09	4.41457e-06	-1.53655	8.69789e-08	2.6508e-06	37	19	1102675	F	GPX4;GPX4	NM_002085;NM_001039847	TSS1500;TSS1500	chr19:1103722-1105758	N_Shore			NA	19:1102583-1103017	Unclassified_Cell_type_specific	TRUE
cg10743102	-2.74079	1.91493e-08	1.31467e-05	-3.80588	1.98391e-14	6.96992e-12	37	3	177055590	F								TRUE			NA
cg10758369	1.25595	3.29852e-05	0.00396332	1.82444	1.18987e-09	6.665e-08	37	1	48459236	R				chr1:48459812-48460061	N_Shore			NA			NA
cg10758902	-3.99707	1.80031e-07	7.75262e-05	-5.36459	2.51799e-12	3.7933e-10	37	11	65560174	R	OVOL1	NM_004561	Body					NA			TRUE
cg10767146	-1.53371	5.25278e-10	7.28606e-07	-1.44301	3.29796e-10	2.2581e-08	37	15	101547283	R	LRRK1	NM_024652	Body	chr15:101548675-101548898	N_Shore			NA	15:101546960-101547588	Unclassified	NA
cg10773266	-2.13386	1.1663e-09	1.4326e-06	-1.73187	4.72082e-08	1.56952e-06	37	10	43895225	F	HNRNPF;HNRNPF;HNRNPF;HNRNPF	NM_001098205;NM_001098206;NM_001098204;NM_004966	5'UTR;5'UTR;5'UTR;5'UTR	chr10:43891546-43892917	S_Shelf			NA	10:43895158-43895334	Promoter_Associated_Cell_type_specific	NA
cg10773780	-2.74257	1.76631e-09	2.01843e-06	-2.90023	2.57625e-11	2.63508e-09	37	1	17846756	F						low-CpG:17719274-17719415		NA			NA
cg10774440	-1.87007	2.11775e-09	2.32784e-06	-1.54041	5.38815e-08	1.75813e-06	37	1	226076153	R	LEFTY1	NM_020997	Body	chr1:226075150-226075680	S_Shore			NA			TRUE
cg10791260	-0.861032	5.22479e-06	0.00100527	-0.700188	5.02483e-05	0.00065516	37	9	117568588	R	TNFSF15	NM_005118	TSS200					NA			NA
cg10794991	1.81103	1.83035e-06	0.00046104	2.30184	5.68919e-10	3.54697e-08	37	8	141537675	F								TRUE			NA
cg10803453	0.594633	0.000117695	0.00999349	0.627913	1.49477e-05	0.000229013	37	17	907105	F	ABR;ABR;ABR	NM_021962;NM_001092;NM_001159746	3'UTR;3'UTR;3'UTR	chr17:909981-910442	N_Shelf			TRUE			NA
cg10806645	-0.969134	4.22899e-06	0.000858865	-1.01223	3.42714e-07	8.68993e-06	37	2	238640512	R	LRRFIP1;LRRFIP1;LRRFIP1;LRRFIP1;LRRFIP1	NM_001137553;NM_004735;NM_001137550;NM_001137552;NM_001137551	Body;Body;Body;Body;Body	chr2:238643905-238644109	N_Shelf			TRUE	2:238640479-238640567	Unclassified_Cell_type_specific	TRUE
cg10808934	-3.7711	1.06613e-09	1.3215e-06	-2.0685	9.99642e-05	0.0011855	37	6	109059268	F								TRUE			TRUE
cg10809958	0.751894	3.40374e-05	0.00406442	0.765496	6.65437e-06	0.000113586	37	7	2758005	R				chr7:2758004-2758257	Island			NA			NA
cg10816760	-1.68114	3.92878e-06	0.000811638	-1.73042	4.38148e-07	1.07489e-05	37	6	142890973	R	LOC153910;LOC153910	NR_027312;NR_027311	Body;Body					TRUE	6:142890865-142891143	Unclassified_Cell_type_specific	NA
cg10818566	-2.31799	7.31131e-05	0.00712275	-3.05477	7.06228e-08	2.21865e-06	37	2	47197798	R	TTC7A	NM_020458	Body					TRUE			TRUE
cg10826338	-1.09314	1.50119e-05	0.00222453	-0.963009	3.53494e-05	0.000483973	37	17	78193351	F	SLC26A11;SLC26A11;SLC26A11;SLC26A11;SGSH	NM_173626;NM_001166348;NM_001166347;NM_001166349;NM_000199	TSS1500;TSS1500;TSS1500;TSS1500;Body	chr17:78193980-78194954	N_Shore			NA	17:78193288-78193466	Promoter_Associated	NA
cg10856812	-1.26928	6.44121e-05	0.00646918	-2.11775	5.54175e-11	5.01319e-09	37	12	117523153	R	TESC;TESC;TESC	NR_031766;NM_017899;NM_001168325	Body;Body;Body					TRUE			NA
cg10857221	-1.54414	2.8385e-06	0.000636717	-1.73975	3.27726e-08	1.14444e-06	37	17	75282140	F	2009-09-01	NM_001113491	Body	chr17:75277317-75278172	S_Shelf			NA			NA
cg10859442	1.71361	2.4958e-06	0.000575239	1.32521	6.0928e-05	0.000773173	37	11	73716367	F	UCP3;UCP3	NM_022803;NM_003356	Body;Body					NA	11:73715771-73716812	Unclassified	NA
cg10881616	-1.56882	8.02667e-05	0.00759644	-1.53826	3.35138e-05	0.000461881	37	17	27073614	R	TRAF4	NM_004295	Body	chr17:27070538-27071570	S_Shelf			TRUE			NA
cg10892950	-1.97576	1.08352e-05	0.00174099	-2.20431	2.39867e-07	6.37712e-06	37	12	45626938	F	ANO6;ANO6;ANO6	NM_001142679;NM_001142680;NM_001025356	Body;Body;Body					TRUE			TRUE
cg10903916	0.806411	3.35829e-05	0.0040221	0.876168	1.83214e-06	3.69787e-05	37	2	9532980	F	ASAP2;ASAP2	NM_001135191;NM_003887	Body;Body	chr2:9533572-9533807	N_Shore			TRUE			NA
cg10921702	-1.8728	5.89364e-08	3.23045e-05	-1.66585	1.62643e-07	4.55446e-06	37	6	30716324	R				chr6:30710307-30712440	S_Shelf			NA			NA
cg10928103	2.17045	4.05129e-07	0.000146987	2.58642	4.80482e-10	3.08911e-08	37	11	15959981	R				chr11:15959855-15960077	Island			NA			NA
cg10932907	-2.00154	2.76074e-06	0.000622355	-2.79515	5.19438e-11	4.74527e-09	37	11	129723947	F	TMEM45B	NM_138788	Body					TRUE	11:129723377-129724290	Promoter_Associated_Cell_type_specific	NA
cg10936763	-0.73238	0.000100226	0.00890333	-0.677785	0.000102727	0.00121291	37	6	36647073	R	CDKN1A;CDKN1A	NM_000389;NM_078467	5'UTR;5'UTR	chr6:36646244-36648465	Island			NA			NA
cg10948220	-1.19574	1.65401e-05	0.00238597	-1.68828	8.09251e-10	4.787e-08	37	2	75775319	R	FAM176A;FAM176A	NM_032181;NM_001135032	5'UTR;5'UTR					TRUE			NA
cg10949007	-1.72595	6.60135e-06	0.00120031	-2.19149	4.13707e-09	1.94211e-07	37	5	95159614	F	GLRX;GLRX	NM_001118890;NM_002064	TSS1500;TSS1500					TRUE			TRUE
cg10955995	-3.12414	1.75702e-09	2.01836e-06	-3.33906	1.76859e-11	1.93154e-09	37	4	23858146	R	PPARGC1A	NM_013261	Body					TRUE			NA
cg10959711	-1.68158	6.48427e-06	0.00118739	-2.16896	2.55387e-09	1.27742e-07	37	1	153509096	R	S100A6	NM_014624	TSS1500	chr1:153508424-153508840	S_Shore			NA	1:153507457-153509370	Promoter_Associated	NA
cg10970251	-1.05575	4.36826e-05	0.00489125	-1.27194	2.74495e-07	7.17289e-06	37	11	796421	F	SLC25A22	NM_024698	TSS1500	chr11:797640-798544	N_Shore		RDMR	TRUE	11:795816-796996	Promoter_Associated	NA
cg10979364	-1.56802	3.39237e-06	0.000726754	-1.24992	4.83958e-05	0.00063468	37	5	14038630	F								TRUE			NA
cg10985914	-0.817256	7.02046e-05	0.00690371	-0.611555	0.00109676	0.00913885	37	1	212769641	R	ATF3	NM_001030287	5'UTR					TRUE			TRUE
cg10987840	-2.08098	9.64738e-08	4.70603e-05	-1.875	1.91683e-07	5.25049e-06	37	2	9319526	F								TRUE			TRUE
cg11020468	-2.03303	9.33026e-05	0.00842915	-3.30386	2.95794e-10	2.05776e-08	37	15	59909007	R	GCNT3	NM_004751	5'UTR			low-CpG:57695950-57696309		NA			NA
cg11027717	-1.41316	9.26342e-06	0.00154695	-1.20756	3.73242e-05	0.000507788	37	11	33713904	R								TRUE			NA
cg11035271	-1.16084	6.25175e-05	0.00633413	-1.37197	7.10268e-07	1.62954e-05	37	10	95654752	R	TMEM20;TMEM20	NM_153226;NM_001134658	Body;Body	chr10:95653641-95654181	S_Shore			NA	10:95653363-95654976	Promoter_Associated	NA
cg11045198	-2.35399	7.69677e-05	0.00737499	-2.58812	4.1741e-06	7.55801e-05	37	6	106330882	R								TRUE			NA
cg11061343	-1.55051	4.99792e-06	0.000971483	-2.4052	3.74959e-12	5.29833e-10	37	17	73993843	R	C17orf106	NM_001113324	Body					TRUE	17:73993699-73993910	Unclassified_Cell_type_specific	NA
cg11095099	-1.84432	2.02759e-05	0.0027878	-2.49538	4.069e-09	1.91258e-07	37	3	195604374	R	TNK2;TNK2	NM_001010938;NM_005781	Body;Body	chr3:195600845-195602361	S_Shelf			NA			TRUE
cg11115622	-1.53192	1.76567e-05	0.00250888	-1.22769	0.000167144	0.00184361	37	14	65169958	R	PLEKHG3	NM_015549	TSS1500	chr14:65170876-65172007	N_Shore		RDMR	NA			NA
cg11117637	-2.15079	3.57606e-06	0.000756788	-1.68305	6.71111e-05	0.000840211	37	5	149546366	R	CDX1;CDX1	NM_001804;NM_001804	1stExon;5'UTR	chr5:149546027-149546988	Island			TRUE	5:149546249-149546400	Unclassified_Cell_type_specific	NA
cg11147886	-2.14572	1.34794e-05	0.00205303	-2.31345	6.86797e-07	1.58233e-05	37	16	69598170	R	NFAT5;NFAT5;NFAT5;NFAT5;NFAT5	NM_138714;NM_173214;NM_001113178;NM_138713;NM_006599	TSS1500;TSS1500;TSS1500;TSS1500;TSS1500	chr16:69599437-69600736	N_Shore		RDMR	NA			NA
cg11149194	-2.37696	2.4216e-07	9.88675e-05	-2.75262	5.8336e-10	3.62703e-08	37	14	27245119	R								TRUE			NA
cg11152412	-0.92981	9.17576e-05	0.00833388	-1.46134	8.10812e-10	4.79554e-08	37	15	74927688	F	EDC3;EDC3;EDC3	NM_001142443;NM_025083;NM_001142444	Body;Body;Body					NA	15:74927479-74928115	Promoter_Associated	TRUE
cg11155222	0.984946	7.67029e-07	0.00023805	1.26842	9.99119e-11	8.23121e-09	37	6	128602411	R	PTPRK;PTPRK	NM_002844;NM_001135648	Body;Body					TRUE			NA
cg11163555	-2.69545	5.44699e-06	0.00103751	-3.4789	1.90882e-09	9.94917e-08	37	22	31736976	R	PATZ1;PATZ1;PATZ1;PATZ1	NM_014323;NM_032052;NM_032050;NM_032051	Body;Body;Body;3'UTR					TRUE			NA
cg11166600	1.22825	5.226e-06	0.00100527	2.123	6.26137e-14	1.78062e-11	37	3	143695141	R	C3orf58;C3orf58	NM_173552;NM_001134470	Body;Body	chr3:143689733-143692279	S_Shelf			NA			NA
cg11171825	-2.80532	5.45843e-10	7.54566e-07	-2.69839	1.68928e-10	1.28717e-08	37	6	42939029	F	PEX6	NM_000287	Body					TRUE			TRUE
cg11182199	-2.70569	2.99201e-08	1.90352e-05	-2.22317	5.50999e-07	1.31104e-05	37	6	150161689	R	LRP11	NM_032832	Body					TRUE	6:150161675-150162123	Unclassified_Cell_type_specific	TRUE
cg11200568	-1.27535	3.9033e-05	0.00450546	-1.0909	0.000131118	0.00149564	37	7	226540	F	FAM20C	NM_020223	Body	chr7:223970-225989	S_Shore			NA			TRUE
cg11210813	-1.14937	4.85804e-06	0.000953213	-1.4606	2.52492e-09	1.26511e-07	37	20	35972385	F	SRC	NM_005417	TSS1500	chr20:35974177-35974913	N_Shore			NA	20:35972287-35972427	Unclassified_Cell_type_specific	NA
cg11228197	-0.942222	1.44614e-05	0.00216579	-1.80451	8.93617e-15	3.62607e-12	37	11	708640	F	EPS8L2	NM_022772	5'UTR	chr11:712310-712515	N_Shelf			TRUE	11:708247-709113	Unclassified_Cell_type_specific	NA
cg11235594	-3.20032	3.59459e-12	1.39609e-08	-3.12966	4.79214e-13	9.6758e-11	37	2	110907413	R	NPHP1;NPHP1;NPHP1;NPHP1	NM_001128179;NM_207181;NM_000272;NM_001128178	Body;Body;Body;Body					TRUE			NA
cg11247674	-1.32654	6.50433e-06	0.00118898	-1.39882	4.61281e-07	1.12366e-05	37	1	55267266	R	TTC22;TTC22	NM_017904;NM_001114108	TSS1500;TSS1500	chr1:55266277-55267058	S_Shore			NA	1:55266307-55267846	Promoter_Associated	TRUE
cg11253191	0.737779	4.33262e-06	0.000873817	0.542572	0.000188731	0.00204989	37	17	79507006	F	C17orf70;C17orf70	NM_025161;NM_001109760	3'UTR;3'UTR	chr17:79503586-79504181	S_Shelf			NA			NA
cg11256132	1.16524	3.93929e-07	0.000143936	1.10753	2.2133e-07	5.95889e-06	37	1	244515893	R	C1orf100	NM_001012970	TSS200					NA			NA
cg11261958	-1.35245	1.17959e-05	0.00185945	-1.00906	0.000317777	0.00320301	37	3	118958539	R	B4GALT4;B4GALT4	NM_212543;NM_003778	5'UTR;5'UTR	chr3:118959339-118959934	N_Shore			NA	3:118958445-118958759	Promoter_Associated_Cell_type_specific	NA
cg11288831	-1.74001	2.57293e-05	0.0033299	-1.47217	0.000106406	0.0012508	37	13	114880831	R	RASA3	NM_007368	Body	chr13:114879041-114879530	S_Shore			TRUE			TRUE
cg11289878	-2.10967	2.33117e-05	0.00309359	-3.68992	1.05233e-12	1.84419e-10	37	4	111121682	R				chr4:111119187-111120084	S_Shore			NA			NA
cg11304234	-0.955207	0.000103606	0.0091184	-0.812142	0.000335023	0.00335199	37	11	112034801	R	IL18;IL18	NM_001562;NM_001562	5'UTR;1stExon			low-CpG:111540000-111540056		NA			NA
cg11314042	-1.75445	3.33062e-09	3.28077e-06	-1.56052	1.06843e-08	4.36582e-07	37	6	143380966	F	AIG1	NM_016108	TSS1500	chr6:143381444-143381918	N_Shore			NA			NA
cg11321190	-2.40925	1.1263e-10	2.10692e-07	-3.10647	2.70971e-16	2.18818e-13	37	3	37239890	F								TRUE			NA
cg11326574	-1.85171	4.33937e-08	2.5389e-05	-1.64541	1.24796e-07	3.61784e-06	37	12	59271109	R	LRIG3;LRIG3	NM_001136051;NM_153377	Body;Body					TRUE			TRUE
cg11332928	-1.01621	2.21608e-06	0.000529114	-0.931861	2.75776e-06	5.27596e-05	37	1	45273680	R	BTBD19;TCTEX1D4	NM_001136537;NM_001013632	TSS1500;TSS1500	chr1:45271679-45272318	S_Shore			TRUE	1:45272776-45274518	Promoter_Associated	NA
cg11335171	-1.19857	1.95446e-05	0.00271193	-0.903262	0.000403064	0.00392388	37	6	33173333	F	HSD17B8	NM_014234	Body	chr6:33172289-33172823	S_Shore			NA	6:33171945-33173651	Promoter_Associated	TRUE
cg11338156	-1.18623	7.99164e-05	0.00757736	-1.70558	8.29622e-09	3.51541e-07	37	10	82423899	R								TRUE	10:82423895-82424182	Unclassified	TRUE
cg11342789	-2.46349	2.08952e-05	0.002851	-2.85706	2.33727e-07	6.24606e-06	37	1	162352023	F	C1orf226;C1orf226	NM_001085375;NM_001135240	Body;Body					NA			NA
cg11344352	-1.03659	3.36799e-10	5.24229e-07	-0.805619	5.11985e-08	1.6827e-06	37	19	45927696	F	ERCC1;ERCC1;ERCC1	NM_001983;NM_202001;NM_001166049	TSS1500;TSS1500;TSS1500	chr19:45926661-45927191	S_Shore			NA	19:45926529-45927845	Promoter_Associated	NA
cg11350053	-0.744722	4.8124e-05	0.00524227	-0.574123	0.000595368	0.00546167	37	6	30711028	R	IER3;FLOT1	NM_003897;NM_005803	3'UTR;TSS1500	chr6:30710307-30712440	Island			NA	6:30710361-30712511	Promoter_Associated	NA
cg11352146	-2.00716	1.73883e-05	0.00248372	-2.72571	2.82302e-09	1.39257e-07	37	11	65192550	F	NEAT1	NR_028272	Body	chr11:65190824-65191058	S_Shore	low-CpG:64948961-64949369	RDMR	NA	11:65191998-65193022	Promoter_Associated	NA
cg11366934	-1.01673	8.02041e-05	0.00759405	-1.17347	1.67046e-06	3.41344e-05	37	7	97912641	F	BRI3;BRI3	NM_015379;NM_001159491	Body;Body	chr7:97910459-97911618	S_Shore		RDMR	NA	7:97912607-97912842	Promoter_Associated_Cell_type_specific	NA
cg11383208	-3.24265	5.69603e-09	5.03875e-06	-3.36353	1.89823e-10	1.41985e-08	37	22	46481948	R	LOC400931	NR_027033	Body	chr22:46481815-46482024	Island			NA			TRUE
cg11383291	-1.85839	3.50625e-05	0.00416141	-3.63913	3.19126e-14	1.03451e-11	37	3	124597938	R	ITGB5	NM_002213	Body					TRUE			TRUE
cg11383391	0.753187	3.35789e-06	0.000721096	0.786739	2.60427e-07	6.85667e-06	37	8	86136317	F				chr8:86132421-86133003	S_Shelf			NA			NA
cg11385536	-2.10713	5.31614e-07	0.000180395	-1.97252	4.27124e-07	1.05094e-05	37	1	227133801	R	CABC1	NM_020247	5'UTR					TRUE			NA
cg11391618	-2.9034	8.42153e-06	0.001443	-5.46562	5.13055e-15	2.31701e-12	37	17	69324042	R								TRUE			NA
cg11393995	-2.45347	2.52616e-15	6.26236e-11	-2.00411	4.63402e-13	9.42999e-11	37	6	2842359	F	SERPINB1	NM_030666	TSS1500	chr6:2841810-2842273	S_Shore			NA	6:2841306-2842601	Promoter_Associated_Cell_type_specific	TRUE
cg11421182	-2.59855	2.51692e-09	2.67992e-06	-3.06791	7.20977e-13	1.35056e-10	37	20	36153479	R	BLCAP;BLCAP;BLCAP;BLCAP;BLCAP	NM_001167821;NM_001167823;NM_001167820;NM_001167822;NM_006698	5'UTR;TSS1500;5'UTR;5'UTR;5'UTR	chr20:36156022-36156669	N_Shelf			NA	20:36153184-36153483	Unclassified_Cell_type_specific	TRUE
cg11426080	-1.49906	1.53671e-05	0.00226482	-1.35825	2.27336e-05	0.000329923	37	10	134662206	R								NA	10:134661525-134662325	Unclassified_Cell_type_specific	NA
cg11429271	-1.98711	1.32888e-06	0.000364196	-2.33109	3.93393e-09	1.85701e-07	37	15	45722346	R	C15orf48;C15orf48	NM_032413;NM_197955	TSS1500;TSS1500	chr15:45722561-45722939	N_Shore			NA	15:45722338-45722972	Unclassified	NA
cg11432034	-1.2231	5.39647e-08	3.01054e-05	-1.15736	3.18312e-08	1.11529e-06	37	3	13520913	R	HDAC11;HDAC11	NM_001136041;NM_024827	TSS1500;TSS1500	chr3:13520912-13521319	Island			NA			NA
cg11433866	1.61282	6.76414e-05	0.00670284	1.9263	6.31752e-07	1.47336e-05	37	12	115126908	R				chr12:115124729-115125152	S_Shore			TRUE			NA
cg11436113	-1.42587	8.22357e-05	0.00773076	-2.12443	3.19157e-09	1.55019e-07	37	20	19191145	R				chr20:19192459-19193902	N_Shore		RDMR	NA			NA
cg11440666	-1.21319	4.45522e-05	0.00496002	-1.81992	7.91356e-10	4.70161e-08	37	11	75115402	F	RPS3;SNORD15B	NM_001005;NR_000025	Body;TSS200					NA			NA
cg11441533	-2.61334	5.14669e-11	1.12238e-07	-2.00822	1.52929e-08	5.94804e-07	37	12	64295363	R	SRGAP1	NM_020762	Body					TRUE			NA
cg11444527	-1.12873	9.61553e-05	0.00862572	-1.66326	5.92423e-09	2.63414e-07	37	7	44081475	F	FLJ35390;RASA4P;FLJ35390	NR_024416;NR_024116;NR_015401	Body;TSS1500;Body	chr7:44079717-44080568	S_Shore			NA			NA
cg11461808	-1.44011	4.65344e-08	2.68036e-05	-1.49608	2.0255e-09	1.04743e-07	37	7	1126579	R	GPER;GPER;C7orf50;GPER;GPER;C7orf50;C7orf50;GPER	NM_001039966;NM_001039966;NM_001134395;NM_001505;NM_001505;NM_032350;NM_001134396;NM_001098201	1stExon;5'UTR;Body;1stExon;5'UTR;Body;Body;TSS1500	chr7:1126578-1126910	Island			NA	7:1126090-1128006	Unclassified	NA
cg11464160	1.33621	2.22856e-05	0.00299445	2.06055	8.45335e-11	7.1521e-09	37	2	131870398	F	PLEKHB2;PLEKHB2	NM_001100623;NM_017958	5'UTR;5'UTR					TRUE			NA
cg11468193	-1.75464	2.09346e-09	2.30736e-06	-1.7958	9.46643e-11	7.87204e-09	37	17	75282040	R	2009-09-01	NM_001113491	Body	chr17:75277317-75278172	S_Shelf			NA			NA
cg11469587	-1.3762	3.36525e-05	0.00402809	-1.16857	0.000127694	0.00146173	37	17	74639849	R	ST6GALNAC1;ST6GALNAC1	NM_018414;NM_018414	5'UTR;1stExon					NA	17:74639607-74640069	Unclassified_Cell_type_specific	NA
cg11484353	-2.05711	1.06683e-07	5.12434e-05	-2.09245	9.54247e-09	3.96602e-07	37	20	39958249	R							DMR	TRUE	20:39958143-39958523	Unclassified_Cell_type_specific	TRUE
cg11538810	-2.04987	3.39553e-07	0.000129558	-1.72306	2.75726e-06	5.27576e-05	37	22	46481727	F	LOC400931	NR_027033	TSS200	chr22:46481815-46482024	N_Shore			NA			TRUE
cg11542165	-2.05848	5.22463e-05	0.00556757	-1.55976	0.000772131	0.00680818	37	20	43029992	R	HNF4A;HNF4A;HNF4A;HNF4A;HNF4A;HNF4A;HNF4A;HNF4A;HNF4A	NM_178849;NM_001030003;NM_001030004;NM_178849;NM_000457;NM_000457;NM_178850;NM_175914;NM_178850	1stExon;Body;Body;5'UTR;5'UTR;1stExon;1stExon;Body;5'UTR			low-CpG:42463279-42463430		NA			NA
cg11558212	-1.43971	9.43297e-05	0.00849559	-1.57589	5.90462e-06	0.000102295	37	13	22810001	R								TRUE			NA
cg11565007	0.411785	9.62072e-06	0.00159292	0.540405	2.88104e-09	1.41793e-07	37	4	106978683	R	TBCK;TBCK;TBCK;TBCK	NM_033115;NM_001163437;NM_001163435;NM_001163436	Body;Body;Body;Body					TRUE			NA
cg11565429	-0.748375	8.91263e-05	0.00816582	-0.571486	0.00104701	0.00879032	37	12	6717567	R	CHD4	NM_001273	TSS1500	chr12:6715500-6715829	S_Shore		RDMR	NA			NA
cg11586249	-1.88344	2.81684e-05	0.0035575	-4.03234	3.75776e-16	2.83783e-13	37	8	119119864	R	EXT1	NM_000127	Body				RDMR	NA			NA
cg11586448	-3.36379	1.22429e-10	2.23185e-07	-4.66254	1.03399e-17	1.62179e-14	37	12	123383399	F				chr12:123380333-123380894	S_Shelf			NA	12:123382955-123383558	Unclassified	TRUE
cg11590705	-2.03896	0.000114855	0.00982759	-2.64043	2.27121e-07	6.08855e-06	37	12	22781171	F	ETNK1;ETNK1	NM_001039481;NM_018638	Body;Body	chr12:22777988-22778301	S_Shelf			NA			NA
cg11594770	-1.7149	0.000113682	0.00974564	-2.94335	7.77418e-11	6.66879e-09	37	3	43221815	R								TRUE	3:43221475-43222015	Unclassified_Cell_type_specific	NA
cg11597497	-1.56494	6.11938e-06	0.00113175	-2.31596	2.92023e-11	2.9224e-09	37	19	45257305	R	BCL3	NM_005178	Body	chr19:45257703-45257918	N_Shore			TRUE	19:45257272-45257488	Promoter_Associated	NA
cg11606261	-3.14647	2.18913e-10	3.65875e-07	-3.4146	8.63492e-13	1.57274e-10	37	12	53775336	R	SP1;SP1	NM_003109;NM_138473	5'UTR;Body	chr12:53774336-53774603	S_Shore		RDMR	NA	12:53775334-53776683	Promoter_Associated	NA
cg11609668	0.550932	0.000112996	0.00970314	0.586184	1.24464e-05	0.000195226	37	11	117075078	R	TAGLN;TAGLN	NM_001001522;NM_003186	3'UTR;3'UTR					NA			NA
cg11613450	-1.64742	8.84482e-06	0.00149233	-2.37479	1.37548e-10	1.08245e-08	37	19	55721792	F	PTPRH;PTPRH	NM_002842;NM_001161440	TSS1500;TSS1500					NA			TRUE
cg11631280	0.461339	1.1269e-05	0.00179513	0.353576	0.000216414	0.00230568	37	11	1001383	R	AP2A2	NM_012305	Body					NA			NA
cg11637968	-2.93615	4.2007e-08	2.484e-05	-3.03633	2.06087e-09	1.06301e-07	37	4	159732036	R	FNIP2	NM_020840	Body					TRUE			TRUE
cg11655490	-1.66377	3.03921e-11	7.65562e-08	-1.10337	4.02262e-07	9.98261e-06	37	12	12038352	R	ETV6	NM_001987	Body					TRUE			NA
cg11665613	1.2486	6.3438e-05	0.00640036	1.16765	5.54616e-05	0.000712742	37	1	12268883	R	TNFRSF1B	NM_001066	3'UTR					TRUE	1:12268280-12270092	Unclassified	NA
cg11671115	-2.50554	1.76351e-05	0.00250668	-2.96628	1.12738e-07	3.32002e-06	37	10	87336486	R								NA			NA
cg11671265	-1.33465	4.76495e-05	0.00520816	-2.77561	5.69416e-15	2.52402e-12	37	4	78722517	R	CNOT6L	NM_144571	Body					TRUE	4:78722371-78722721	Promoter_Associated_Cell_type_specific	NA
cg11674355	-2.05979	1.68194e-07	7.36737e-05	-2.36026	5.01162e-10	3.19687e-08	37	2	65610261	F	SPRED2	NM_181784	Body					TRUE	2:65609769-65610321	Unclassified	TRUE
cg11678864	-1.42533	3.39315e-06	0.000726754	-1.37398	1.54061e-06	3.18433e-05	37	5	151154298	F	G3BP1;G3BP1	NM_198395;NM_005754	5'UTR;5'UTR	chr5:151150014-151152086	S_Shelf		RDMR	NA			NA
cg11680590	-2.42991	4.22868e-07	0.000151402	-3.28513	7.40367e-12	9.27003e-10	37	15	92701885	R	SLCO3A1;SLCO3A1	NM_001145044;NM_013272	Body;Body					TRUE			NA
cg11685391	-1.26041	2.83336e-05	0.00356966	-1.33543	2.47287e-06	4.79984e-05	37	10	103594334	F	KCNIP2;KCNIP2;KCNIP2;KCNIP2;KCNIP2;KCNIP2;KCNIP2	NM_173195;NM_173191;NM_173193;NM_173194;NM_173192;NM_014591;NM_173197	Body;Body;Body;Body;Body;Body;Body	chr10:103590286-103590609	S_Shelf			NA	10:103594078-103594378	Unclassified_Cell_type_specific	NA
cg11690194	1.2619	6.23727e-06	0.00115019	1.09916	1.90421e-05	0.000282802	37	1	6339954	R	ACOT7;ACOT7;ACOT7;ACOT7	NM_181864;NM_181865;NM_007274;NM_181866	Body;Body;Body;Body	chr1:6339948-6340268	Island			NA			NA
cg11690578	0.953489	0.000100424	0.00891629	0.755947	0.000755778	0.00668392	37	17	4510827	R	SMTNL2;SMTNL2	NM_001114974;NM_198501	3'UTR;3'UTR	chr17:4510554-4510777	S_Shore			TRUE			NA
cg11696200	1.40254	5.99778e-07	0.000198209	2.42306	7.08136e-16	4.6338e-13	37	13	33768013	F	STARD13;STARD13	NM_052851;NM_178006	5'UTR;Body					TRUE	13:33767951-33768101	Unclassified_Cell_type_specific	NA
cg11700584	-1.41852	2.84577e-07	0.000112453	-1.41348	4.92305e-08	1.62786e-06	37	14	50088544	F	RPL36AL;MGAT2	NM_001001;NM_002408	TSS1500;1stExon	chr14:50086955-50088261	S_Shore			NA	14:50088407-50088805	Promoter_Associated	NA
cg11714752	-0.743522	7.16459e-05	0.00701663	-0.795836	6.35116e-06	0.000108992	37	2	96926568	F	TMEM127	NM_017849	Body					TRUE	2:96926328-96926877	Promoter_Associated	TRUE
cg11732925	-2.34808	2.18237e-06	0.000524135	-2.33012	5.12101e-07	1.23026e-05	37	2	128293021	R	MYO7B	NM_001080527	TSS1500					NA			NA
cg11737230	-0.628799	0.000108157	0.00939039	-0.645665	2.18515e-05	0.000318744	37	10	88159580	F				chr10:88159613-88161411	N_Shore			NA	10:88159559-88159896	Promoter_Associated	NA
cg11737831	-0.719141	7.74684e-05	0.00741463	-0.674942	6.42917e-05	0.00080986	37	19	980707	R				chr19:982689-983080	N_Shore			NA			TRUE
cg11746359	0.812541	8.25035e-05	0.00774345	1.14639	1.47783e-08	5.77765e-07	37	4	141012403	R	MAML3	NM_018717	Body					TRUE			NA
cg11750112	1.44625	3.50241e-05	0.00415807	1.94835	1.15578e-08	4.67128e-07	37	1	64938742	R	CACHD1	NM_020925	Body	chr1:64935554-64936614	S_Shelf		RDMR	NA			NA
cg11750851	-2.05591	1.21965e-05	0.00190202	-2.93197	3.45007e-10	2.34492e-08	37	1	86047433	R	CYR61	NM_001554	Body	chr1:86046362-86047240	S_Shore			NA			NA
cg11756095	-0.778118	1.12504e-06	0.000319941	-0.704204	1.85755e-06	3.74248e-05	37	1	32410614	R				chr1:32410188-32410630	Island			TRUE	1:32409307-32410768	Unclassified	TRUE
cg11767757	-2.91737	2.64466e-08	1.71191e-05	-2.38606	5.49884e-07	1.30885e-05	37	21	40145404	R	NCRNA00114	NR_027065	TSS200					TRUE			TRUE
cg11772804	-2.40106	7.68351e-07	0.000238098	-3.20988	2.83633e-11	2.84963e-09	37	6	30131971	F	TRIM15	NM_033229	Body					NA			NA
cg11783264	-0.892292	3.29313e-05	0.00395801	-0.750001	0.000144623	0.0016272	37	19	1905046	R	SCAMP4;ADAT3	NM_079834;NM_138422	TSS1500;TSS1500	chr19:1905106-1905835	N_Shore			NA	19:1904898-1905932	Promoter_Associated	NA
cg11786833	-1.65461	4.09987e-05	0.00466905	-2.13529	4.66819e-08	1.55425e-06	37	1	41884697	R								TRUE			TRUE
cg11792786	-2.20446	1.80635e-07	7.77043e-05	-2.91803	4.20969e-12	5.8412e-10	37	5	14870083	F	ANKH	NM_054027	Body	chr5:14871391-14871611	N_Shore			NA			NA
cg11811510	-1.98684	5.25151e-05	0.00559029	-3.14483	2.03463e-10	1.50096e-08	37	19	43032683	R	CEACAM1;CEACAM1	NM_001024912;NM_001712	TSS200;TSS200					NA	19:43032355-43033797	Promoter_Associated	NA
cg11819702	-2.05683	3.67018e-06	0.000771503	-1.84243	7.05465e-06	0.000119409	37	5	73529573	F								TRUE			NA
cg11820833	-2.25111	3.40494e-07	0.000129771	-1.73548	1.39602e-05	0.000215751	37	14	65187054	F	PLEKHG3	NM_015549	5'UTR					TRUE			TRUE
cg11834956	1.03366	2.16502e-05	0.00291966	1.50743	4.83877e-10	3.10849e-08	37	19	1824369	F	REXO1	NM_020695	Body	chr19:1822339-1822638	S_Shore			NA	19:1824369-1824590	Gene_Associated_Cell_type_specific	NA
cg11844042	-3.53349	8.13592e-13	4.42382e-09	-1.47698	0.00023619	0.00248533	37	4	153602251	R	TMEM154	NM_152680	TSS1500					NA			TRUE
cg11847468	-1.53352	3.2689e-05	0.00393818	-2.09059	7.40287e-09	3.19327e-07	37	10	3825031	R	KLF6;KLF6;KLF6;KLF6	NR_027653;NM_001160124;NM_001160125;NM_001300	Body;Body;Body;Body	chr10:3826853-3828126	N_Shore		RDMR	NA	10:3824634-3826417	Promoter_Associated	TRUE
cg11847543	1.00667	3.05939e-05	0.0037636	1.36792	7.23471e-09	3.13067e-07	37	10	78400585	R								TRUE			NA
cg11847636	-1.26753	1.98677e-06	0.000488709	-1.47744	8.16401e-09	3.46768e-07	37	19	50015523	F	FCGRT;FCGRT	NM_001136019;NM_004107	TSS200;TSS1500	chr19:50016531-50016851	N_Shore			NA			TRUE
cg11857093	-1.42037	6.23884e-06	0.00115019	-1.1643	5.13628e-05	0.000667494	37	1	115642150	F								TRUE	1:115641605-115642641	Promoter_Associated_Cell_type_specific	NA
cg11860777	-3.0553	6.57882e-11	1.38292e-07	-3.03083	6.22487e-12	8.02824e-10	37	17	38609504	F	IGFBP4	NM_001552	Body					NA			TRUE
cg11869784	-1.05275	8.54918e-05	0.00794166	-1.34124	2.07051e-07	5.6201e-06	37	14	21738303	R	HNRNPC;HNRNPC;HNRNPC;HNRNPC	NM_031314;NM_001077442;NM_004500;NM_001077443	TSS1500;TSS1500;TSS1500;TSS1500	chr14:21737406-21738094	S_Shore			NA	14:21737434-21738559	Promoter_Associated	NA
cg11875995	-2.56979	1.68166e-10	2.94329e-07	-3.1196	6.66218e-15	2.88415e-12	37	8	123587744	F								TRUE			NA
cg11883418	-1.3357	1.74265e-05	0.00248621	-1.75774	6.9519e-09	3.02434e-07	37	6	119069624	R								TRUE			NA
cg11896170	-2.75003	2.8424e-06	0.00063724	-2.47854	4.92247e-06	8.72443e-05	37	3	160395073	R	ARL14;ARL14	NM_025047;NM_025047	1stExon;5'UTR					NA			NA
cg11903206	-1.33462	3.19014e-05	0.00387618	-1.16566	8.08083e-05	0.000986173	37	3	70911187	R								TRUE			NA
cg11909975	-2.30154	3.56882e-07	0.00013426	-2.58799	2.35358e-09	1.19111e-07	37	2	128159058	F				chr2:128158437-128158912	S_Shore			NA			TRUE
cg11915812	-2.29952	6.82687e-07	0.000218355	-3.08402	2.104e-11	2.23618e-09	37	2	10554240	F	HPCAL1;HPCAL1	NM_002149;NM_134421	5'UTR;5'UTR					TRUE			TRUE
cg11935282	-1.06249	0.000115245	0.00985063	-1.29491	8.9332e-07	1.98653e-05	37	7	128114609	R				chr7:128116667-128117312	N_Shelf			NA			TRUE
cg11938718	-2.08444	1.43338e-07	6.43764e-05	-1.17211	0.000748641	0.00663102	37	2	10526453	F	HPCAL1;HPCAL1	NM_002149;NM_134421	5'UTR;5'UTR					TRUE			TRUE
cg11947857	-0.586303	2.54803e-05	0.00330397	-1.0353	8.96315e-13	1.62138e-10	37	19	1411919	F	DAZAP1;DAZAP1	NM_018959;NM_170711	Body;Body	chr19:1407109-1408843	S_Shelf			NA	19:1411862-1412317	Promoter_Associated_Cell_type_specific	TRUE
cg11956866	1.10116	9.24889e-05	0.0083779	1.33261	7.49463e-07	1.70831e-05	37	22	31998253	F	SFI1;SFI1	NM_001007467;NM_014775	Body;Body					TRUE			TRUE
cg11957248	-1.68969	2.332e-05	0.00309369	-1.4782	5.91959e-05	0.000754173	37	10	105238964	F	CALHM3;CALHM3	NM_001129742;NM_001129742	5'UTR;1stExon					NA			TRUE
cg11959316	-1.63838	5.62426e-05	0.00587198	-1.96441	4.43092e-07	1.08565e-05	37	1	57001742	R	PPAP2B;PPAP2B	NM_177414;NM_003713	Body;Body					TRUE			NA
cg11962640	1.53488	5.53645e-05	0.00580259	1.83288	4.74334e-07	1.15133e-05	37	1	19764686	R	CAPZB	NM_004930	Body					NA			NA
cg11983038	-2.14906	9.10264e-05	0.00828777	-3.29369	1.70366e-09	9.02286e-08	37	13	34251128	F								TRUE			TRUE
cg11993160	-1.36874	4.36897e-06	0.000878141	-1.77279	1.21755e-09	6.79512e-08	37	18	12404041	F				chr18:12407715-12408242	N_Shelf			NA			TRUE
cg11998200	-1.67272	1.01854e-07	4.92137e-05	-2.07061	1.97338e-11	2.11945e-09	37	7	92274858	R	CDK6;CDK6	NM_001259;NM_001145306	Body;Body					TRUE			NA
cg12014333	-0.93764	3.94786e-05	0.00455175	-1.14098	1.87129e-07	5.14263e-06	37	19	13228096	R	TRMT1;NACC1;TRMT1;TRMT1	NM_017722;NM_052876;NM_001136035;NM_001142554	TSS1500;TSS1500;TSS1500;TSS1500	chr19:13228886-13229576	N_Shore			NA	19:13227073-13228421	Promoter_Associated	NA
cg12019475	0.909601	3.86367e-05	0.00447111	1.09396	2.38919e-07	6.35979e-06	37	6	45700739	F								TRUE			NA
cg12036544	-0.989073	3.63523e-05	0.00427193	-0.772118	0.000414033	0.00401485	37	10	22013777	R	MLLT10;MLLT10	NM_004641;NM_001009569	Body;Body					TRUE	10:22013721-22013830	Unclassified_Cell_type_specific	TRUE
cg12039766	-0.955336	1.84677e-05	0.00259697	-1.26827	5.97406e-09	2.65271e-07	37	2	109648496	R				chr2:109647955-109648230	S_Shore		DMR	TRUE	2:109647411-109649178	Unclassified_Cell_type_specific	NA
cg12043019	-2.02047	3.84628e-12	1.46591e-08	-2.32491	5.75342e-16	3.94331e-13	37	22	50356277	R	PIM3	NM_001001852	Body	chr22:50353596-50357215	Island			NA			NA
cg12045443	-1.98651	1.97918e-05	0.002736	-2.60408	9.51914e-09	3.95728e-07	37	12	89777963	R								TRUE			NA
cg12045829	-1.6112	4.2774e-05	0.00481065	-2.21169	9.72275e-09	4.03027e-07	37	17	7452926	R	TNFSF12;TNFSF12-TNFSF13	NM_003809;NM_172089	Body;Body	chr17:7452150-7452645	S_Shore			TRUE	17:7451854-7453481	Unclassified	TRUE
cg12053291	0.799894	6.7903e-06	0.00122473	0.778044	2.68484e-06	5.1517e-05	37	12	125282342	F	SCARB1;SCARB1	NM_001082959;NM_005505	Body;Body					TRUE			NA
cg12065616	-1.44091	1.23035e-08	9.13982e-06	-1.52937	2.21324e-10	1.60713e-08	37	12	94954828	F								TRUE	12:94954793-94954844	Unclassified_Cell_type_specific	NA
cg12078253	-1.72198	1.05684e-05	0.00170619	-1.91305	2.56351e-07	6.7616e-06	37	2	42281792	R	PKDCC	NM_138370	Body					TRUE			NA
cg12079115	0.624502	5.91599e-06	0.00110364	0.455438	0.000262264	0.00271998	37	2	241851444	F				chr2:241855374-241855631	N_Shelf			NA			NA
cg12081645	-3.21664	9.62541e-10	1.20407e-06	-3.91376	6.13976e-14	1.75583e-11	37	4	157920476	R								TRUE			TRUE
cg12081946	-1.86859	2.76498e-09	2.8932e-06	-2.19323	1.01912e-12	1.79837e-10	37	13	21296465	R	IL17D	NM_138284	3'UTR	chr13:21295611-21296438	S_Shore			TRUE			TRUE
cg12086028	-1.67788	2.92481e-07	0.000114908	-1.84248	3.64567e-09	1.7356e-07	37	6	33241026	R	VPS52;RPS18	NM_022553;NM_022551	TSS1500;Body	chr6:33239326-33240099	S_Shore			NA			NA
cg12097550	-2.17406	9.92545e-06	0.00162883	-2.81827	4.31571e-09	2.01231e-07	37	12	54068942	R	ATP5G2;ATP5G2	NM_001002031;NM_005176	Body;Body	chr12:54069625-54070177	N_Shore		RDMR	NA			NA
cg12109797	-2.30957	1.43402e-06	0.000385244	-3.97081	5.18529e-15	2.3314e-12	37	8	86414553	R								TRUE			NA
cg12120406	-2.72734	1.82225e-05	0.00257244	-3.58746	7.57167e-09	3.25404e-07	37	17	25822056	R	KSR1	NM_014238	5'UTR					TRUE			NA
cg12122737	0.672081	5.62721e-05	0.00587356	0.84743	1.37108e-07	3.92234e-06	37	22	42065726	R				chr22:42062790-42063002	S_Shelf			NA			NA
cg12127811	-2.68425	8.44335e-08	4.23522e-05	-3.35579	1.06577e-11	1.26198e-09	37	10	92079600	F								TRUE			TRUE
cg12140749	0.748929	1.68192e-05	0.00241559	0.736897	5.73031e-06	9.96267e-05	37	14	69264039	R	C14orf181	NM_207442	TSS1500	chr14:69259612-69262900	S_Shore			NA			NA
cg12146829	-1.08663	0.0001177	0.00999349	-0.887086	0.000612186	0.00559131	37	5	1107855	F	SLC12A7	NM_006598	Body	chr5:1108802-1109051	N_Shore			NA	5:1107482-1108429	Promoter_Associated_Cell_type_specific	NA
cg12165685	-1.79353	3.86895e-11	8.96463e-08	-1.6323	7.20765e-11	6.26585e-09	37	19	47288109	R	SLC1A5;SLC1A5;SLC1A5;SLC1A5	NM_001145145;NM_001145145;NM_005628;NM_001145144	1stExon;5'UTR;Body;5'UTR	chr19:47290585-47291983	N_Shelf	low-CpG:51979838-51980043		NA	19:47287361-47288340	Promoter_Associated	NA
cg12166570	-0.958593	3.40459e-05	0.00406442	-0.876829	4.22053e-05	0.000564422	37	14	74225642	R	C14orf43;C14orf43	NM_001043318;NM_194278	5'UTR;5'UTR	chr14:74225626-74227209	Island			NA			NA
cg12176793	-2.21345	1.50316e-06	0.000398826	-1.93943	4.63983e-06	8.2905e-05	37	8	90624127	R								TRUE			TRUE
cg12177407	-1.11714	2.48948e-05	0.003256	-1.66438	3.20755e-10	2.20471e-08	37	10	98799272	F	SLIT1	NM_003061	Body	chr10:98803065-98803434	N_Shelf			NA			NA
cg12179380	1.06587	1.13463e-05	0.00180392	0.960237	1.87124e-05	0.000278524	37	8	142084624	R								TRUE			NA
cg12182124	-3.01034	2.62472e-08	1.70441e-05	-4.43355	2.67647e-15	1.36434e-12	37	18	21451563	F	LAMA3;LAMA3;LAMA3;LAMA3	NM_000227;NM_001127718;NM_198129;NM_001127717	TSS1500;TSS1500;Body;Body					NA	18:21451255-21451736	Unclassified_Cell_type_specific	NA
cg12182708	-1.52247	8.51656e-05	0.00792038	-1.23728	0.000496206	0.00467908	37	10	99223744	R	MMS19	NM_022362	Body					TRUE	10:99223379-99223872	Gene_Associated_Cell_type_specific	TRUE
cg12184624	-2.07117	1.61151e-05	0.00234289	-1.87919	2.32604e-05	0.000336419	37	10	105239164	F	CALHM3	NM_001129742	TSS200					NA			TRUE
cg12190413	-0.784019	3.09275e-05	0.00378295	-0.671421	0.000104931	0.00123621	37	19	14627564	R	DNAJB1	NM_006145	Body	chr19:14628406-14629689	N_Shore		CDMR	NA			NA
cg12192749	-2.97129	3.9098e-09	3.72531e-06	-3.10017	1.01772e-10	8.36582e-09	37	7	17029795	F								TRUE			TRUE
cg12195314	-2.32856	0.000109673	0.00948571	-3.97648	8.46278e-11	7.15859e-09	37	19	2491255	F				chr19:2489064-2489641	S_Shore			NA			TRUE
cg12206571	2.09893	6.67047e-05	0.00664284	3.50732	5.68937e-11	5.13307e-09	37	1	32052538	R	TINAGL1	NM_022164	Body	chr1:32052471-32052771	Island			TRUE			NA
cg12217560	-1.48591	4.88104e-06	0.000956514	-1.70513	4.18523e-08	1.41194e-06	37	13	24144900	F	TNFRSF19;TNFRSF19	NM_148957;NM_148957	1stExon;5'UTR					TRUE			NA
cg12224508	-1.11514	3.64655e-05	0.00427813	-1.3317	2.5908e-07	6.82519e-06	37	2	28589782	F								TRUE	2:28589377-28590175	Unclassified_Cell_type_specific	NA
cg12229082	-1.45317	7.72283e-06	0.00134511	-1.22666	3.87244e-05	0.00052378	37	7	150721650	R	ATG9B	NM_173681	TSS200	chr7:150725173-150726018	N_Shelf			NA			NA
cg12232308	-2.00552	2.2472e-11	6.02906e-08	-2.09327	2.79741e-13	6.13001e-11	37	6	30711580	F	IER3;FLOT1	NM_003897;NM_005803	3'UTR;TSS1500	chr6:30710307-30712440	Island			NA	6:30710361-30712511	Promoter_Associated	NA
cg12235469	-2.26563	6.68494e-05	0.00665563	-4.25195	8.85946e-13	1.6086e-10	37	11	12746796	F	TEAD1	NM_021961	5'UTR					TRUE			NA
cg12243133	-1.08298	2.72184e-05	0.0034741	-1.12658	3.39297e-06	6.31783e-05	37	11	66823616	F	RHOD	NM_014578	TSS1500	chr11:66824118-66824621	N_Shore			NA			NA
cg12249789	0.563923	5.14672e-05	0.00550591	0.666781	5.32721e-07	1.27312e-05	37	21	45203404	F				chr21:45206579-45207051	N_Shelf			NA			NA
cg12265130	-1.62063	1.4397e-05	0.00215851	-1.98232	3.70288e-08	1.27119e-06	37	11	59437344	R	PATL1	NM_152716	TSS1500	chr11:59436201-59437232	S_Shore		CDMR	NA	11:59437078-59438660	Promoter_Associated	NA
cg12273325	-1.52001	1.44983e-05	0.00216971	-2.77247	6.82537e-14	1.91563e-11	37	22	31689831	F	PIK3IP1;PIK3IP1	NM_001135911;NM_052880	TSS1500;TSS1500	chr22:31686636-31687371	S_Shelf			NA	22:31689744-31689860	Unclassified_Cell_type_specific	TRUE
cg12279138	-1.44599	3.41358e-05	0.00407157	-1.68511	4.13229e-07	1.02175e-05	37	1	224370322	F	DEGS1;DEGS1	NM_144780;NM_003676	TSS1500;TSS1500	chr1:224370585-224371755	N_Shore			NA	1:224370246-224370383	Promoter_Associated	NA
cg12280317	-1.32866	7.40341e-05	0.00717647	-1.74881	7.43754e-08	2.31868e-06	37	1	152008083	F	S100A11	NM_005620	Body	chr1:152008838-152009112	N_Shore			TRUE	1:152006593-152008142	Promoter_Associated	NA
cg12286963	-0.8785	9.49853e-05	0.00854654	-0.798847	0.000125434	0.00143982	37	11	72433438	F	ARAP1;ARAP1;ARAP1	NM_001040118;NM_001135190;NM_015242	Body;TSS200;TSS200					TRUE	11:72432591-72434003	Promoter_Associated	NA
cg12292134	0.973613	1.38789e-05	0.00209936	1.14521	9.4271e-08	2.84539e-06	37	8	131272997	R	ASAP1	NM_018482	Body					TRUE			NA
cg12299478	-1.59469	4.16413e-06	0.000849074	-1.40068	1.13588e-05	0.000180478	37	10	111935236	F								TRUE			NA
cg12301814	-1.53137	1.98538e-05	0.00274085	-2.23988	3.75742e-10	2.51897e-08	37	19	17347791	F	NR2F6	NM_005234	Body	chr19:17346165-17346886	S_Shore			NA			NA
cg12307314	-2.63292	1.08591e-08	8.28964e-06	-3.36377	2.49274e-13	5.57319e-11	37	5	142206724	F	ARHGAP26;ARHGAP26	NM_015071;NM_001135608	Body;Body					TRUE			NA
cg12315997	-1.08119	9.50923e-07	0.000279589	-1.00234	9.49875e-07	2.0925e-05	37	4	39461668	R	LIAS;RPL9;RPL9;LIAS	NM_006859;NM_001024921;NM_000661;NM_194451	Body;TSS1500;TSS1500;Body	chr4:39460087-39460811	S_Shore			NA	4:39461593-39461764	Promoter_Associated	NA
cg12323347	-1.00279	2.08103e-05	0.0028421	-0.958708	1.21867e-05	0.00019175	37	10	112256517	R	DUSP5	NM_004419	TSS1500	chr10:112257163-112258684	N_Shore			NA			TRUE
cg12338657	-1.45629	1.90293e-05	0.00265628	-2.16101	2.19315e-10	1.59539e-08	37	10	80384267	F								TRUE			NA
cg12340503	-2.59898	2.7464e-06	0.000620839	-2.81109	8.84863e-08	2.69071e-06	37	11	128212805	F								TRUE	11:128212663-128213236	Promoter_Associated	NA
cg12355172	-2.13836	2.75618e-06	0.000621672	-2.03398	1.63424e-06	3.34983e-05	37	11	67418315	R	ACY3	NM_080658	TSS200					NA	11:67417860-67418447	Unclassified	TRUE
cg12370935	-1.35691	3.07756e-07	0.000119528	-1.30912	1.19685e-07	3.49351e-06	37	17	16976475	R	MPRIP;MPRIP	NM_015134;NM_201274	Body;Body					TRUE			NA
cg12374682	1.07158	8.94447e-05	0.0081867	1.20071	3.51379e-06	6.50891e-05	37	11	64703430	R	GPHA2	NM_130769	TSS200					TRUE	11:64702898-64703467	Unclassified_Cell_type_specific	NA
cg12377816	-2.66033	1.99321e-13	1.40145e-09	-2.93467	1.14272e-16	1.11219e-13	37	12	58758818	R								TRUE			TRUE
cg12378753	-1.51907	8.48647e-09	6.82607e-06	-1.55476	4.57023e-10	2.96258e-08	37	10	116527201	R				chr10:116527524-116528474	N_Shore			NA	10:116527156-116528445	Unclassified_Cell_type_specific	TRUE
cg12382415	-1.73427	6.46511e-07	0.000209912	-1.90981	9.08676e-09	3.80766e-07	37	15	67072678	R	SMAD6;SMAD6;SMAD6	NM_001142861;NR_027654;NM_005585	Body;Body;Body	chr15:67073306-67073943	N_Shore			TRUE	15:67072595-67072757	Unclassified_Cell_type_specific	TRUE
cg12384236	-1.6187	2.18963e-05	0.00294797	-2.2824	1.3857e-09	7.58516e-08	37	21	42880714	F	TMPRSS2;TMPRSS2	NM_001135099;NM_005656	TSS1500;TSS1500	chr21:42878751-42880674	S_Shore			NA			NA
cg12386061	-1.12377	1.39002e-05	0.00210181	-1.39491	2.39397e-08	8.74717e-07	37	3	37906586	F	CTDSPL;CTDSPL	NM_005808;NM_001008392	Body;Body	chr3:37901938-37904039	S_Shelf			NA	3:37906483-37906619	Unclassified_Cell_type_specific	NA
cg12392104	-1.83219	0.000105511	0.00923557	-3.05938	1.62098e-10	1.2442e-08	37	15	55665153	R	CCPG1;MIR628;CCPG1	NM_020739;NR_030358;NM_004748	Body;Body;Body					NA			NA
cg12394201	-2.26075	5.93082e-09	5.18762e-06	-2.44819	4.78614e-11	4.43593e-09	37	11	43942418	R								TRUE			TRUE
cg12404590	-1.74856	1.34425e-07	6.11138e-05	-1.99738	4.1256e-10	2.72151e-08	37	22	50455653	R	TTLL8	NM_001080447	Body	chr22:50453056-50454137	S_Shore		DMR	NA	22:50455211-50455980	Unclassified	NA
cg12407791	1.02238	7.48225e-05	0.00723055	0.896001	0.000167802	0.0018498	37	17	73824354	F	UNC13D	NM_199242	Body					NA	17:73822946-73824716	Promoter_Associated	NA
cg12413346	-1.37457	1.06501e-06	0.000305341	-1.62682	2.24536e-09	1.14344e-07	37	15	43425285	R	TMEM62	NM_024956	TSS1500	chr15:43425772-43426263	N_Shore			NA	15:43425269-43427020	Promoter_Associated	NA
cg12422154	-3.71393	1.21588e-14	1.90783e-10	-3.81204	1.35514e-16	1.27924e-13	37	6	30130819	R	TRIM15	NM_033229	TSS200					NA			NA
cg12423493	-2.45342	2.6118e-05	0.00336534	-3.72818	1.86824e-10	1.40076e-08	37	11	64007813	R	FKBP2;FKBP2	NM_004470;NM_001135208	TSS1500;TSS1500	chr11:64008283-64009487	N_Shore			NA	11:64007539-64007880	Promoter_Associated_Cell_type_specific	NA
cg12424383	-1.53103	1.53644e-06	0.000405281	-2.73147	1.19313e-15	7.11435e-13	37	1	27990967	R				chr1:27994727-27995031	N_Shelf			NA			NA
cg12435551	-1.62773	7.99056e-05	0.00757736	-2.4927	1.3416e-09	7.37545e-08	37	1	118679290	R	SPAG17	NM_206996	Body					TRUE	1:118679082-118679455	Unclassified_Cell_type_specific	NA
cg12441694	-2.63976	2.92829e-10	4.68301e-07	-2.76694	4.42693e-12	6.08261e-10	37	13	106572969	R								TRUE			NA
cg12442108	1.26911	2.36423e-06	0.000552517	1.44601	1.91694e-08	7.22557e-07	37	12	52564910	F	KRT80;KRT80	NM_001081492;NM_182507	3'UTR;3'UTR					TRUE	12:52564888-52566633	Unclassified	NA
cg12444450	0.949474	8.736e-05	0.00805611	1.02461	6.98797e-06	0.000118457	37	1	45763846	R								TRUE			NA
cg12483005	-3.25857	6.72784e-07	0.000215865	-4.75141	9.78934e-13	1.74247e-10	37	1	23474871	R	LUZP1;LUZP1	NM_033631;NM_001142546	5'UTR;5'UTR					TRUE			NA
cg12483340	0.941661	6.79193e-07	0.00021775	0.794571	4.68473e-06	8.36193e-05	37	15	42503039	R	TMEM87A	NM_015497	3'UTR	chr15:42500160-42500561	S_Shelf			NA			NA
cg12491114	-1.94465	1.54637e-08	1.10247e-05	-2.14761	7.95319e-11	6.79804e-09	37	17	39685524	F	KRT19	NM_002276	TSS1500	chr17:39683908-39684599	S_Shore			NA			NA
cg12492380	-2.07364	1.64623e-05	0.00238149	-2.42613	1.36319e-07	3.9018e-06	37	7	98872169	F	MYH16	NR_002147	Body					NA			TRUE
cg12498580	-3.03509	4.37005e-08	2.55318e-05	-2.86166	2.81708e-08	1.0043e-06	37	12	7070732	F								TRUE	12:7069947-7071841	Promoter_Associated	NA
cg12503394	-1.50586	7.51997e-06	0.00131391	-1.54189	1.04187e-06	2.26361e-05	37	7	1596118	R	TMEM184A	NM_001097620	TSS200					TRUE	7:1594906-1596387	Unclassified_Cell_type_specific	NA
cg12510708	-3.28773	2.04059e-10	3.43868e-07	-4.16432	1.36416e-15	7.83535e-13	37	7	26193805	R	NFE2L3	NM_004289	Body	chr7:26191794-26192757	S_Shore		RDMR	TRUE			TRUE
cg12548341	-1.00701	2.55698e-06	0.000586141	-1.07989	1.00093e-07	2.99803e-06	37	10	104420963	F				chr10:104416555-104417165	S_Shelf			TRUE	10:104420546-104421705	Unclassified	TRUE
cg12548348	-1.37539	1.37752e-05	0.00208677	-1.15279	7.1282e-05	0.000885228	37	17	43484496	R	ARHGAP27;ARHGAP27	NM_001159330;NM_199282	TSS1500;5'UTR	chr17:43483097-43483454	S_Shore			NA	17:43484355-43484615	Unclassified_Cell_type_specific	NA
cg12549345	-0.926598	4.93171e-05	0.00533467	-0.760557	0.00027995	0.0028767	37	19	2789453	R	THOP1	NM_003249	Body	chr19:2790376-2790717	N_Shore			NA	19:2789372-2789757	Unclassified_Cell_type_specific	NA
cg12551813	1.08947	1.36303e-07	6.17608e-05	1.4978	6.555e-13	1.255e-10	37	1	200781121	R	CAMSAP1L1	NM_203459	Body					TRUE			NA
cg12551957	-1.87332	7.71592e-07	0.000238558	-1.54685	7.85269e-06	0.000131164	37	7	5535006	R	FBXL18	NM_024963	Body	chr7:5534384-5534766	S_Shore			TRUE	7:5534203-5535349	Unclassified	NA
cg12559925	-2.02703	6.68904e-05	0.00665662	-2.51508	2.62231e-07	6.89839e-06	37	2	235863365	F	SH3BP4	NM_014521	5'UTR	chr2:235860117-235861716	S_Shore		RDMR	NA			NA
cg12581691	-1.90938	1.12232e-05	0.00179064	-1.92263	2.32858e-06	4.55074e-05	37	17	17642247	F	RAI1	NM_030665	5'UTR					TRUE			TRUE
cg12586150	-1.83126	7.69014e-05	0.00737205	-2.51783	2.59464e-08	9.36291e-07	37	6	2840792	F	SERPINB1	NM_030666	Body	chr6:2841810-2842273	N_Shore			TRUE			NA
cg12590005	-1.35881	1.15116e-06	0.000326017	-1.45365	4.01682e-08	1.36191e-06	37	6	35997326	F	MAPK14;MAPK14;MAPK14;MAPK14	NM_139014;NM_139013;NM_139012;NM_001315	Body;Body;Body;Body	chr6:35995245-35996372	S_Shore		RDMR	NA			NA
cg12593746	-1.45184	7.38851e-05	0.00716763	-1.39782	4.11169e-05	0.000551712	37	1	98789535	F								TRUE			NA
cg12614090	-1.08974	3.49018e-07	0.000132032	-0.880211	6.1047e-06	0.00010531	37	10	116444240	R	ABLIM1;ABLIM1;ABLIM1;ABLIM1	NM_001003407;NM_001003408;NM_001003407;NM_001003408	1stExon;1stExon;5'UTR;5'UTR			low-CpG:116434145-116434368		TRUE			NA
cg12620005	-1.7362	2.98039e-05	0.00369203	-2.4923	1.41121e-09	7.69177e-08	37	1	51779655	F	TTC39A;TTC39A	NM_001080494;NM_001144832	Body;Body					TRUE	1:51779549-51779706	Unclassified_Cell_type_specific	TRUE
cg12620935	-2.09177	7.77421e-09	6.36617e-06	-2.34638	1.98854e-11	2.13347e-09	37	5	53603562	R	ARL15	NM_019087	Body	chr5:53605932-53606798	N_Shelf			NA	5:53603483-53603723	Unclassified_Cell_type_specific	NA
cg12630243	-1.85508	2.0939e-05	0.00285394	-2.28928	5.15162e-08	1.69126e-06	37	3	150067033	R								TRUE			NA
cg12632315	-2.5274	1.81278e-06	0.000458029	-3.40262	8.82753e-11	7.41942e-09	37	3	134069894	R								TRUE			NA
cg12635314	-1.53534	6.17197e-05	0.00627349	-1.29244	0.000243254	0.00254916	37	10	2815004	R				chr10:2815003-2815469	Island			NA			NA
cg12635790	-1.53377	2.00559e-07	8.50195e-05	-0.971087	0.000205068	0.00220059	37	8	96112814	F								TRUE	8:96112610-96112833	Unclassified_Cell_type_specific	NA
cg12651286	-3.58018	2.5148e-09	2.67992e-06	-5.32635	3.67494e-17	4.4736e-14	37	11	102473828	F	MMP20	NM_004771	Body					TRUE			NA
cg12656085	-3.18878	4.17099e-14	4.40732e-10	-3.79658	4.39179e-19	1.24374e-15	37	2	85173360	F								TRUE	2:85173173-85173853	Unclassified	TRUE
cg12656312	-2.12683	8.5282e-06	0.00145455	-3.11226	7.84351e-11	6.72119e-09	37	11	6024266	R	OR56A4	NM_001005179	1stExon					NA			NA
cg12662929	-0.638388	2.83033e-05	0.00356966	-1.25629	1.50427e-14	5.56666e-12	37	1	160368823	F				chr1:160370112-160370658	N_Shore			TRUE			NA
cg12663811	-2.12023	7.78106e-08	3.98637e-05	-2.69899	4.94664e-12	6.64447e-10	37	1	901685	R	PLEKHN1;PLEKHN1	NM_032129;NM_001160184	TSS200;TSS200	chr1:894313-902654	Island			NA	1:901590-901708	Unclassified	NA
cg12669354	1.72937	5.72109e-05	0.00594719	2.54881	2.17681e-09	1.11424e-07	37	11	831584	R	CD151;CD151;CD151;CD151;EFCAB4A	NM_139030;NM_004357;NM_139029;NM_001039490;NM_173584	TSS1500;TSS1500;TSS1500;TSS1500;3'UTR	chr11:829284-833558	Island			TRUE			TRUE
cg12669395	1.00591	3.77717e-05	0.00439722	1.08973	2.2556e-06	4.42637e-05	37	6	30860866	R	DDR1;DDR1;DDR1	NM_013993;NM_001954;NM_013994	Body;Body;Body					NA	6:30860453-30861002	Unclassified	NA
cg12678462	0.621796	2.5454e-05	0.00330221	0.469376	0.000478421	0.00453779	37	6	44070391	F								TRUE			NA
cg12682870	-1.66113	1.17954e-05	0.00185945	-1.43342	3.95673e-05	0.000533483	37	6	43766804	R								TRUE			TRUE
cg12686314	-1.45505	5.19895e-05	0.00554868	-1.54158	5.19019e-06	9.13579e-05	37	10	95225718	R	MYOF;MYOF	NM_133337;NM_013451	Body;Body					TRUE			TRUE
cg12710531	1.39765	2.69736e-05	0.00344826	2.71026	2.4642e-14	8.30505e-12	37	11	88032774	F	CTSC	NM_001814	Body					TRUE			NA
cg12710800	-1.30481	8.47331e-05	0.00789781	-1.16391	0.000147444	0.00165446	37	10	74008773	F								TRUE	10:74007717-74008980	Unclassified	NA
cg12719510	-0.846247	5.1233e-05	0.00548661	-1.00203	5.12648e-07	1.23129e-05	37	1	155024394	R	ADAM15;ADAM15;ADAM15;ADAM15;ADAM15;ADAM15	NM_207194;NM_207196;NM_207197;NM_003815;NM_207195;NM_207191	Body;Body;Body;Body;Body;Body	chr1:155022988-155024332	S_Shore			NA	1:155024151-155025400	Promoter_Associated	NA
cg12728588	1.24792	1.29173e-07	5.92546e-05	1.12145	2.69816e-07	7.07192e-06	37	1	36025489	F	NCDN;NCDN;NCDN	NM_001014841;NM_014284;NM_001014839	Body;Body;Body	chr1:36022680-36023834	S_Shore			NA	1:36024152-36026059	Promoter_Associated	NA
cg12734688	-1.73613	2.72718e-05	0.00347875	-2.12678	9.19188e-08	2.78346e-06	37	1	48308390	R								TRUE			NA
cg12737588	1.65102	7.96197e-10	1.02427e-06	1.40149	1.02997e-08	4.23454e-07	37	15	70546706	F								NA			NA
cg12743031	-1.95098	9.09297e-09	7.18633e-06	-1.89637	2.35649e-09	1.19214e-07	37	8	27219512	R	PTK2B;PTK2B;PTK2B;PTK2B	NM_173175;NM_004103;NM_173174;NM_173176	5'UTR;5'UTR;5'UTR;5'UTR					TRUE	8:27219508-27219964	Unclassified	TRUE
cg12765632	-1.37411	4.29062e-05	0.00482286	-1.86473	1.33787e-08	5.30212e-07	37	6	26109295	R	HIST1H1T	NM_005323	TSS1500					NA			NA
cg12799029	-3.46786	1.97552e-17	1.61125e-12	-2.98762	5.85113e-16	3.99684e-13	37	17	984184	R	ABR;ABR;ABR	NM_021962;NM_001092;NM_001159746	Body;Body;Body	chr17:981508-981748	S_Shelf			TRUE	17:984033-984314	Unclassified	TRUE
cg12832726	-1.75946	3.36634e-06	0.00072215	-1.56253	7.62653e-06	0.000127884	37	11	68096165	F	LRP5	NM_002335	Body					NA	11:68095959-68096232	Unclassified_Cell_type_specific	TRUE
cg12866292	-0.839847	5.83574e-06	0.00109167	-0.596094	0.000367568	0.00362654	37	17	8079312	R	TMEM107;TMEM107	NM_032354;NM_183065	Body;Body	chr17:8079490-8080125	N_Shore		RDMR	NA	17:8079104-8079982	Promoter_Associated	NA
cg12873919	-1.88428	9.72848e-06	0.00160685	-2.25357	3.74801e-08	1.28357e-06	37	20	30309627	F	BCL2L1;BCL2L1	NM_138578;NM_001191	Body;Body	chr20:30310503-30310707	N_Shore		RDMR	NA			NA
cg12874792	1.78412	9.02832e-06	0.00151639	1.989	1.92584e-07	5.27196e-06	37	14	68831098	F	RAD51L1;RAD51L1;RAD51L1	NM_133509;NM_002877;NM_133510	Body;Body;Body					TRUE			NA
cg12881765	-2.06722	4.9469e-06	0.000963864	-2.21914	2.19404e-07	5.91523e-06	37	17	48841566	R	C17orf73	NR_024626	Body					TRUE			NA
cg12889126	1.1864	2.04361e-06	0.000498738	2.00981	2.00901e-14	7.03852e-12	37	12	75435362	R	KCNC2;KCNC2	NM_153748;NM_139136	3'UTR;3'UTR					NA			NA
cg12894325	-1.36532	5.3516e-06	0.00102321	-1.1663	2.30879e-05	0.000334304	37	11	67418113	R	ACY3;ACY3	NM_080658;NM_080658	5'UTR;1stExon					NA	11:67417860-67418447	Unclassified	TRUE
cg12915819	0.842569	2.04033e-06	0.000498738	0.777479	2.24117e-06	4.40164e-05	37	2	3453113	R	TTC15	NM_016030	Body	chr2:3452346-3452582	S_Shore			TRUE			NA
cg12926596	-1.62522	2.18995e-06	0.000525026	-1.05385	0.000598832	0.00548827	37	12	56111944	F	BLOC1S1	NM_001487	Body	chr12:56109798-56110298	S_Shore			TRUE			NA
cg12953200	-1.06788	0.000100232	0.00890333	-1.08812	2.27707e-05	0.000330404	37	4	2795501	R	SH3BP2	NM_001122681	5'UTR	chr4:2794494-2794875	S_Shore			NA	4:2794392-2795596	Promoter_Associated	NA
cg12972064	-2.99238	2.51078e-13	1.67853e-09	-2.90878	3.71555e-14	1.16579e-11	37	3	171887393	R	FNDC3B;FNDC3B	NM_001135095;NM_022763	Body;Body					TRUE			NA
cg12992443	-1.30238	9.0129e-05	0.00823179	-1.29367	3.08208e-05	0.00042966	37	20	35093928	R	DLGAP4;DLGAP4;DLGAP4	NM_183006;NM_001042486;NM_014902	Body;5'UTR;Body	chr20:35089448-35089998	S_Shelf		RDMR	NA	20:35093888-35094344	Unclassified_Cell_type_specific	TRUE
cg12999453	-2.24892	1.56068e-10	2.76718e-07	-2.27477	7.91537e-12	9.82324e-10	37	17	59482319	F	TBX2	NM_005994	Body	chr17:59473060-59483266	Island		DMR	TRUE			NA
cg13003011	-1.34037	5.84887e-07	0.000193918	-1.94322	9.56783e-13	1.70904e-10	37	2	20425680	F	SDC1;SDC1	NM_002997;NM_001006946	TSS1500;TSS1500	chr2:20423088-20425767	Island			NA	2:20424205-20426423	Unclassified	NA
cg13008174	-1.02297	3.71356e-05	0.00433477	-1.29675	6.28099e-08	2.00486e-06	37	8	11640960	F	NEIL2;NEIL2;NEIL2;NEIL2	NM_145043;NM_001135746;NM_001135748;NM_001135747	Body;Body;Body;Body					NA			TRUE
cg13009608	-2.44408	2.5885e-05	0.00334686	-2.69811	9.40534e-07	2.07506e-05	37	8	81034420	R	TPD52;TPD52	NM_005079;NM_001025253	Body;Body					TRUE			NA
cg13013841	-2.15629	4.89677e-06	0.000958675	-3.11884	4.27479e-11	4.0363e-09	37	17	18281021	R	EVPLL	NM_001145127	TSS200					NA			NA
cg13015534	-1.69631	4.75234e-05	0.00519717	-1.67956	1.60067e-05	0.000243141	37	17	74639793	R	ST6GALNAC1;ST6GALNAC1	NM_018414;NM_018414	5'UTR;1stExon					NA	17:74639607-74640069	Unclassified_Cell_type_specific	NA
cg13019306	-2.6987	5.21363e-08	2.93261e-05	-1.97365	8.92383e-06	0.000146516	37	5	145155873	R	PRELID2;PRELID2;PRELID2	NM_205846;NM_138492;NM_182960	Body;Body;Body					TRUE			TRUE
cg13027458	-2.1252	0.000105675	0.00924582	-2.0898	4.32167e-05	0.000576064	37	16	59789219	F	LOC644649	NR_028471	TSS200	chr16:59788792-59789072	S_Shore			NA			NA
cg13030582	1.6748	3.46113e-07	0.000131365	1.03608	0.000375479	0.00369278	37	17	19290708	R	MFAP4	NM_002404	TSS1500					TRUE			NA
cg13038025	-2.17812	1.42519e-05	0.00214064	-3.11016	4.37908e-10	2.85363e-08	37	15	42130650	R	JMJD7-PLA2G4B;JMJD7-PLA2G4B;PLA2G4B	NR_015346;NM_005090;NM_001114633	Body;Body;TSS1500					NA			TRUE
cg13044052	-1.5775	5.53196e-05	0.00579937	-1.56722	1.78651e-05	0.000267562	37	6	30103699	R	TRIM40	NM_138700	TSS1500					NA			NA
cg13057055	-1.41577	3.25419e-08	2.03589e-05	-1.93864	8.06184e-14	2.20204e-11	37	17	36572011	R				chr17:36575499-36575782	N_Shelf			TRUE			NA
cg13057167	0.738649	1.40324e-06	0.000379978	0.752638	1.69629e-07	4.72413e-06	37	14	103750565	R								TRUE			NA
cg13065206	-2.82347	5.06651e-08	2.87985e-05	-3.7802	3.89843e-13	8.16955e-11	37	15	41062017	F	DNAJC17;C15orf62	NM_018163;NM_001130448	Body;TSS200					NA	15:41060977-41062235	Gene_Associated	TRUE
cg13065228	2.0471	4.05168e-05	0.00463031	2.8132	8.57761e-09	3.62147e-07	37	8	145701192	R	FOXH1;FOXH1	NM_003923;NM_003923	1stExon;5'UTR	chr8:145703038-145703902	N_Shore			NA			NA
[truncated: 2,052 more rows]
